# Supplementary material for: Rapamycin Response in Tumorigenic and Non-Tumorigenic Hepatic Cell Lines
Source: PLoS One. 2009 Oct 9;4(10):e7373. doi: 10.1371/journal.pone.0007373 (PMC2756589; doi:10.1371/journal.pone.0007373)
Supplement: Table S1 — Genes that show differential expression in response to rapamycin. Results are shown for the WB-F344 (Table S1A), WB311 (Table S1B), GN5 (Table S1C) and H5D (Table S1D) cell lines. Note that for Tables S1A and S1B, some genes have more than one Affymatrix Probe ID while some have neither a gene title nor a gene symbol. (0.80 MB XLS) [file pone.0007373.s003.xls]

## Sheet: WB-F344
WB-F344 Cells
Affymatrix Probe ID	Gene Title	Gene Symbol	Fold Change
1367568_a_at	matrix Gla protein	Mgp	13.6809
1368527_at	prostaglandin-endoperoxide synthase 2	Ptgs2	6.14803
1387018_at	Arg/Abl-interacting protein ArgBP2	Argbp2	5.72815
1368078_at	endothelial cell-specific molecule 1	Esm1	5.52412
1387306_a_at	early growth response 2	Egr2	4.72328
1379935_at	chemokine (C-C motif) ligand 7	Ccl7	4.59583
1398464_at	Transcribed locus	---	4.59463
1384605_at	Transcribed locus	---	4.19243
1377390_at	beta-site APP-cleaving enzyme 2	RGD:1303241	4.16905
1393179_at	FMS-like tyrosine kinase 1	Flt1	3.88662
1367973_at	chemokine (C-C motif) ligand 2	Ccl2	3.79774
1392618_at	Transcribed locus	---	3.74362
1390274_at	Transcribed locus	---	3.64478
1367581_a_at	secreted phosphoprotein 1	Spp1	3.62662
1368359_a_at	VGF nerve growth factor inducible	Vgf	3.58093
1370492_a_at	FMS-like tyrosine kinase 1	Flt1	3.46142
1393235_at	FMS-like tyrosine kinase 1	Flt1	3.36973
1376374_at	Transcribed locus	---	3.24987
1383019_at	FMS-like tyrosine kinase 1	Flt1	3.18944
1380168_at	ets variant gene 4 (E1A enhancer binding protein, E1AF) (predicted)	Etv4_predicted	3.1861
1375184_at	Transcribed locus, weakly similar to XP_317582.1 ENSANGP00000025094 [Anopheles gambiae]	---	3.18443
1390965_at	Transcribed locus	---	3.1501
1387311_at	NADPH oxidase 1	Nox1	3.01262
1375473_at	FMS-like tyrosine kinase 1	Flt1	3.00012
1393314_at	Transcribed locus	---	2.96066
1382387_at	Transcribed locus	---	2.89736
1395197_at	FMS-like tyrosine kinase 1	Flt1	2.87661
1392990_at	SRY-box containing gene 17 (predicted)	Sox17_predicted	2.83187
1383987_at	Transcribed locus	---	2.78443
1368771_at	sulfatase 1	Sulf1	2.7376
1368990_at	cytochrome P450, family 1, subfamily b, polypeptide 1	Cyp1b1	2.72995
1368308_at	myelocytomatosis viral oncogene homolog (avian)	Myc	2.71621
1377113_at	FMS-like tyrosine kinase 1	Flt1	2.61774
1383447_at	ets variant gene 5 (ets-related molecule) (predicted)	Etv5_predicted	2.60821
1378898_at	Transcribed locus	---	2.60318
1368339_at	calbindin 3, (vitamin D-dependent calcium binding protein)	Calb3	2.60163
1370937_a_at	integrin alpha 7	Itga7	2.57805
1382940_at	Transcribed sequence with weak similarity to protein pir:T33381 (C.elegans) T33381 hypothetical protein H22K11.2 - Caenorhabditis elegans	---	2.57451
1388471_at	similar to RIKEN cDNA E430026E19 (predicted)	RGD1307494_predicted	2.44553
1386186_s_at	Transcribed sequence with moderate similarity to protein pir:S12207 (M.musculus) S12207 hypothetical protein	---	2.40684
1373062_at	Sulfatase 1	Sulf1	2.38285
1370406_a_at	decay accelarating factor 1	Daf1	2.38202
1369193_at	cyclin-dependent kinase inhibitor 2B (p15, inhibits CDK4)	Cdkn2b	2.36912
1367802_at	serum/glucocorticoid regulated kinase	Sgk	2.35447
1398840_at	vesicle-associated membrane protein 5	Vamp5	2.34511
1384187_at	similar to Adapter-related protein complex 1 sigma 1B subunit (Sigma-adaptin 1B) (Adaptor protein complex AP-1 sigma-1B subunit) (Golgi adaptor HA1/AP1 adaptin sigma-1B subunit) (Clathrin assembly protein complex 1 sigma-1B small chain) (Sigma 1B s...	LOC302671	2.31986
1370538_at	laminin, alpha 3	Lama3	2.31757
1367853_at	hypothetical gene supported by NM_031798	LOC497723	2.30114
1369087_at	FMS-like tyrosine kinase 1	Flt1	2.28099
1387951_at	decay accelarating factor 1	Daf1	2.27747
1370850_at	sodium channel, voltage-gated, type III, beta	Scn3b	2.25811
1373343_at	Transcribed locus	---	2.25577
1382291_at	Similar to SRY sex determining region Y-box 9 protein	---	2.25268
1388698_at	extracellular matrix protein 1	Ecm1	2.24797
1383531_at	Transcribed sequences	---	2.23022
1384399_at	LOC501082	LOC501082	2.22196
1374864_at	sprouty homolog 2 (Drosophila) (predicted)	Spry2_predicted	2.19887
1382818_at	similar to hypothetical protein D630010C10 (predicted)	RGD1309752_predicted	2.19739
1371774_at	spermidine/spermine N1-acetyl transferase	Sat	2.1943
1392813_at	Similar to SRY sex determining region Y-box 9 protein	---	2.18845
1376403_at	UI-R-BS1-azc-e-04-0-UI.s1 UI-R-BS1 Rattus norvegicus cDNA clone UI-R-BS1-azc-e-04-0-UI 3', mRNA sequence.	---	2.16435
1372213_at	similar to hypothetical protein MGC6835	LOC500300	2.16173
1387757_at	liver regeneration p-53 related protein	RGD:708471	2.15808
1387450_at	transforming growth factor alpha	Tgfa	2.15052
1398616_at	similar to Adapter-related protein complex 1 sigma 1B subunit (Sigma-adaptin 1B) (Adaptor protein complex AP-1 sigma-1B subunit) (Golgi adaptor HA1/AP1 adaptin sigma-1B subunit) (Clathrin assembly protein complex 1 sigma-1B small chain) (Sigma 1B s...	LOC302671	2.14956
1373628_at	Transcribed locus	---	2.0757
1368124_at	dual specificity phosphatase 5	Dusp5	2.07121
1385978_at	Transcribed locus	---	2.05625
1372064_at	similar to chemokine (C-X-C motif) ligand 16	Cxcl16	2.05199
1383435_at	sodium channel, voltage-gated, type III, beta	Scn3b	2.03472
1370389_at	hypothetical gene supported by NM_138846	LOC497844	2.02472
1368342_at	adenosine monophosphate deaminase 3	Ampd3	2.0234
1382607_at	Transcribed sequences	---	2.01485
1382778_at	Dual specificity phosphatase 6	Dusp6	2.005
1383964_at	Transcribed locus	---	1.9979
1388447_at	Transcribed locus, strongly similar to NP_084275.3 limb-bud and heart [Mus musculus]	---	1.99674
1385671_at	Transcribed locus	---	1.99232
1372760_at	LOC499304	---	1.98776
1387788_at	Jun-B oncogene	Junb	1.98668
1373258_at	Similar to cathepsin F (LOC361704), mRNA	---	1.98658
1368490_at	CD14 antigen	Cd14	1.98403
1387969_at	chemokine (C-X-C motif) ligand 10	Cxcl10	1.96764
1387024_at	dual specificity phosphatase 6	Dusp6	1.96234
1369194_a_at	cyclin dependent kinase inhibitor 2A	RGD:2323	1.9606
1384772_at	protein kinase, cAMP dependent, catalytic, beta (predicted)	Prkacb	1.95607
1385132_at	myeloblastosis oncogene-like 1 (predicted)	Mybl1_predicted	1.94507
1388720_at	Transcribed locus	---	1.93779
1377064_at	dual specificity phosphatase 6	Dusp6	1.9341
1381253_at	Transcribed locus	---	1.93157
1375637_at	similar to RIKEN cDNA 1110003E01 (predicted)	RGD1311122_predicted	1.91264
1386994_at	B-cell translocation gene 2, anti-proliferative	Btg2	1.90549
1384842_s_at	Tumor necrosis factor receptor superfamily, member 6	RGD:619831	1.90397
1386041_a_at	Kruppel-like factor	Klf2	1.90238
1374920_at	Transcribed locus	---	1.89865
1374635_at	A disintegrin and metalloprotease domain 23 (predicted)	---	1.88975
1388309_at	high mobility group AT-hook 1	Hmga1	1.88133
1390723_at	Transcribed locus	---	1.87543
1372308_at	CDNA clone IMAGE:7366335	---	1.87474
1373051_at	liver regeneration p-53 related protein	RGD:708471	1.86255
1390312_at	similar to mKIAA2005 protein /// similar to mKIAA2005 protein /// similar to mKIAA2005 protein	LOC500012 /// LOC500014 /// LOC500015	1.85876
1392157_at	plexin A2 (predicted)	Plxna2_predicted	1.85831
1372365_at	Transcribed locus	---	1.85184
1373079_at	Transcribed locus	---	1.84352
1396386_at	Similar to aspartyl protease 1 (LOC360705), mRNA	---	1.8418
1383666_at	LOC362113 (LOC362113), mRNA	---	1.83774
1372426_at	Similar to thrombospondin repeat protein 1	---	1.83687
1373546_at	ATPase, class VI, type 11A (predicted)	Ua20	1.83427
1374227_at	similar to hypothetical protein FLJ20272 (predicted)	RGD1305264_predicted	1.83343
1372332_at	Transcribed locus	---	1.83235
1373921_at	Transcribed locus	---	1.83022
1376588_at	Transcribed locus	---	1.82135
1374749_at	Similar to RIKEN cDNA 2010015J01 (LOC316365), mRNA	---	1.82052
1395184_at	EST239993 Normalized rat ovary, Bento Soares Rattus sp. cDNA clone ROVEM17 3' end, mRNA sequence.	---	1.81324
1368595_at	matrix metallopeptidase 24	Mmp24	1.81011
1367806_at	glutaminase	Gls	1.80838
1379302_at	Transcribed locus	---	1.80817
1371835_at	protein kinase, cAMP dependent, catalytic, beta (predicted)	Prkacb	1.80263
1373592_at	similar to SPI6	MGC94010	1.79422
1392852_at	Similar to SPARC-related protein (LOC314280), mRNA	---	1.79069
1385093_at	similar to hypothetical protein LOC284018 isoform b	LOC498014	1.79051
1386935_at	nuclear receptor subfamily 4, group A, member 1	Nr4a1	1.77997
1375349_at	Transcribed locus	---	1.77282
1369909_s_at	fasting-inducible integral membrane protein TM6P1	Tm6p1	1.77019
1382021_at	Transcribed locus	---	1.76032
1389715_at	yippee-like 4	Ypel4	1.75223
1386611_at	Dre1 protein	Dre1	1.74873
1387294_at	SH3-domain binding protein 5 (BTK-associated)	Sh3bp5	1.74727
1375074_at	ProSAPiP2 protein	Prosapip2	1.74103
1391074_at	cellular retinoic acid binding protein I	Crabp1	1.739
1390555_at	similar to Suppressor of cytokine signaling 5	LOC500616	1.73773
1389282_at	Transcribed locus	---	1.73736
1390863_at	Transcribed locus	---	1.73728
1373410_at	similar to MADS box transcription enhancer factor 2, polypeptide C (myocyte enhancer factor 2C)	LOC499497	1.73551
1386921_at	carboxypeptidase E	Cpe	1.73337
1376569_at	Kruppel-like factor	Klf2	1.73263
1398986_at	tumor differentially expressed 1 (predicted)	Tde1_predicted	1.73166
1380662_at	UI-R-CN1-cjo-c-17-0-UI.s1 UI-R-CN1 Rattus norvegicus cDNA clone UI-R-CN1-cjo-c-17-0-UI 3', mRNA sequence.	---	1.72941
1383797_a_at	LOC362113 (predicted)	RGD1310165_predicted	1.72838
1370099_at	F-box and leucine-rich repeat protein 20	Fbxl20	1.72228
1373514_at	similar to chromosome 17 open reading frame 27 (predicted)	RGD1308168_predicted	1.72205
1390205_at	zinc finger, SWIM domain containing 6 (predicted)	Zswim6_predicted	1.72174
1373672_at	Similar to SPI6 (LOC361241), mRNA	---	1.71356
1371953_at	Cyclin G2 (predicted)	Ccng2	1.71336
1385194_at	RB1-inducible coiled-coil 1 (predicted)	Rb1cc1_predicted	1.70721
1398358_a_at	similar to integrin beta-5	LOC498091	1.70542
1384220_at	tubulin-specific chaperone c (predicted)	Tbcc_predicted	1.70419
1373843_at	Transcribed locus	---	1.70333
1396689_at	Similar to polycystic kidney disease 2	Spp1	1.69675
1372750_at	Follistatin	Fst	1.69391
1377720_x_at	EST196568 Normalized rat kidney, Bento Soares Rattus sp. cDNA clone RKIAX04 3' end, mRNA sequence.	---	1.69331
1373093_at	similar to Mitogen-inducible gene 6 protein homolog (Mig-6) (Gene 33 polypeptide) (predicted)	RGD1307599_predicted	1.6932
1379483_at	Basic helix-loop-helix domain containing, class B2	Bhlhb2	1.69221
1393331_at	Headcase homolog (Drosophila) (predicted)	---	1.68993
1383093_at	Transcribed locus, weakly similar to XP_536174.1 PREDICTED: similar to MEF2A protein [Canis familiaris]	---	1.68967
1388874_at	Transcribed locus	---	1.68601
1379369_at	prickle-like 1 (Drosophila)	Prickle1	1.6807
1383075_at	cyclin D1	Ccnd1	1.67968
1374144_at	Transcribed locus	---	1.67932
1376858_at	Similar to Exocyst complex component Sec6 (rSec6) (LOC308412), mRNA	---	1.67419
1368868_at	A kinase (PRKA) anchor protein (gravin) 12	Akap12	1.67264
1383110_at	Dre1 protein	Dre1	1.67063
1392946_at	Transcribed locus	---	1.6704
1387566_at	phospholipase A2, group IVA (cytosolic, calcium-dependent)	Pla2g4a	1.66669
1384239_at	Ribosomal protein L31	Rpl31	1.66518
1382516_at	Transcribed locus	---	1.6646
1388501_at	Transcribed locus, strongly similar to NP_082617.1 RIKEN cDNA 2810439F02 [Mus musculus]	---	1.66122
1383064_at	Transcribed locus	---	1.66015
1370082_at	transforming growth factor, beta 1	Tgfb1	1.65897
1367898_at	BCL2/adenovirus E1B 19 kDa-interacting protein 3-like	Bnip3l	1.65352
1390387_at	Similar to SH3 domain protein D19 (predicted)	---	1.65186
1372895_at	similar to RIKEN cDNA 5730469M10 (predicted)	RGD1309676_predicted	1.64514
1383300_at	Dre1 protein	Dre1	1.6436
1395741_at	Meningioma expressed antigen 5 (hyaluronidase)	Mgea5	1.64055
1370129_at	meningioma expressed antigen 5 (hyaluronidase)	Mgea5	1.63959
1378305_at	transmembrane 4 superfamily member 1 (predicted)	Tm4sf1_predicted	1.63585
1387389_at	receptor (calcitonin) activity modifying protein 3	Ramp3	1.63092
1368207_at	FXYD domain-containing ion transport regulator 5	Fxyd5	1.63049
1370897_at	branched chain ketoacid dehydrogenase E1, alpha polypeptide	Bckdha	1.62895
1385641_at	Origin recognition complex, subunit 4-like (yeast)	Orc4l	1.62704
1384562_at	UI-R-C2-nj-c-06-0-UI.s1 UI-R-C2 Rattus norvegicus cDNA clone UI-R-C2-nj-c-06-0-UI 3', mRNA sequence.	---	1.62475
1388149_at	transporter 1, ATP-binding cassette, sub-family B (MDR/TAP)	Tap1	1.62087
1397766_at	Transcribed locus, moderately similar to NP_076356.1 RIKEN cDNA 8030498B09 [Mus musculus]	---	1.61982
1379271_at	similar to Suppressor of cytokine signaling 5	LOC500616	1.61771
1372955_at	Transcribed locus	---	1.61504
1379866_at	Transcribed locus	---	1.61289
1383322_at	RAS-like family 11 member B	RGD:1303099	1.61146
1374573_at	similar to Dynein 2 light intermediate chain (predicted)	RGD1310286_predicted	1.61006
1381969_at	Transcribed locus	---	1.6082
1368132_at	transducer of ERBB2, 1	Tob1	1.60655
1383760_at	Transcribed locus, strongly similar to NP_758458.1 zinc finger, CSL domain containing 2 [Mus musculus]	---	1.60348
1384449_at	Transcribed sequences	---	1.6026
1368123_at	insulin-like growth factor 1 receptor	Igf1r	1.5995
1387379_at	Rho-associated coiled-coil forming kinase 2	Rock2	1.59814
1379341_at	USP6 N-terminal like (predicted)	---	1.59714
1383624_at	similar to hypothetical protein LOC284018 isoform b	LOC498014	1.59708
1385027_at	UI-R-CT0-bty-f-05-0-UI.s1 UI-R-CT0 Rattus norvegicus cDNA clone UI-R-CT0-bty-f-05-0-UI 3', mRNA sequence.	---	1.59576
1389833_at	Transcribed locus	---	1.58928
1368489_at	fos-like antigen 1	Fosl1	1.5889
1392386_at	Transcribed locus	---	1.58664
1370085_at	RAS p21 protein activator 1	Rasa1	1.58591
1375199_at	Transcribed locus	---	1.58366
1376994_at	Transcribed locus, moderately similar to XP_418823.1 PREDICTED: similar to leucine-rich repeats containing F-box protein FBL3 [Gallus gallus]	---	1.58358
1387344_at	aldehyde dehydrogenase family 6, subfamily A1	Aldh6a1	1.58216
1371974_at	phytanoyl-CoA dioxygenase domain containing 1 (predicted)	Phyhd1_predicted	1.58173
1392264_s_at	serine (or cysteine) proteinase inhibitor, clade E, member 1	Serpine1	1.57658
1387770_at	putative ISG12(a) protein	RGD:1303168	1.57651
1381967_at	RNA-binding region (RNP1, RRM) containing 2 (predicted)	Rnpc2_predicted	1.57288
1392905_at	Guanine nucleotide binding protein, gamma 2	Gng2	1.57279
1368187_at	glycoprotein (transmembrane) nmb	Gpnmb	1.57123
1374422_at	Transcribed locus	---	1.56818
1393308_at	Transcribed locus	---	1.56773
1374976_a_at	Sterol O-acyltransferase 1	Soat1	1.56657
1375337_at	a disintegrin and metalloproteinase domain 9 (meltrin gamma) (predicted)	Adam9_predicted	1.56643
1386978_at	BCL2/adenovirus E1B 19 kDa-interacting protein 3-like	Bnip3l	1.56306
1381857_at	RAS p21 protein activator 1	Rasa1	1.56305
1373685_at	similar to low density lipoprotein receptor-related protein binding protein	LOC361149	1.56237
1386102_at	Transcribed sequences	---	1.5612
1392529_at	UI-R-DK0-ceo-e-08-0-UI.s1 UI-R-DK0 Rattus norvegicus cDNA clone UI-R-DK0-ceo-e-08-0-UI 3', mRNA sequence.	---	1.55988
1398969_at	Meningioma expressed antigen 5 (hyaluronidase)	Mgea5	1.55917
1384380_at	Transcribed locus	---	1.55814
1368834_at	calcium/calmodulin-dependent protein kinase II, delta	Camk2d	1.55536
1367651_at	cathepsin D	Ctsd	1.5543
1374408_at	similar to CBF1 interacting corepressor (predicted)	RGD1309199_predicted	1.55407
1374525_at	Transcribed locus	---	1.55114
1370609_a_at	solute carrier family 16 (monocarboxylic acid transporters), member 7 /// hypothetical gene supported by NM_017302	Slc16a7 /// LOC497820	1.54921
1375027_at	Cell cycle progression 1 (predicted)	---	1.54846
1372422_at	Transcribed locus	---	1.54595
1370064_at	presenilin 2	Psen2	1.5428
1377141_at	Similar to RIKEN cDNA 1110018J18	---	1.54274
1390937_at	similar to chromosome 14 open reading frame 50 (predicted)	RGD1309051_predicted	1.53667
1383744_at	Transcribed locus, weakly similar to XP_537771.1 PREDICTED: similar to hypothetical protein [Canis familiaris]	---	1.53621
1379356_at	Transcribed locus	---	1.53569
1388415_at	catenin src (predicted)	Catns_predicted	1.53556
1374027_at	Zinc finger protein 8	Azf8	1.53234
1390403_at	Similar to CG8312-PA (predicted)	---	1.53205
1383299_at	Transcribed locus	---	1.52887
1369022_at	SV2 related protein	Svop	1.52791
1387106_at	SH3-domain binding protein 4	Sh3bp4	1.52788
1386976_at	kangai 1	Kai1	1.5277
1395552_s_at	Transcribed locus	---	1.52685
1381996_at	glycoprotein m6b	---	1.52624
1383328_x_at	Transcribed sequence with moderate similarity to protein pir:JC5193 (H.sapiens) JC5193 nuclear protein H731 - human	---	1.52557
1370163_at	ornithine decarboxylase 1	Odc1	1.52272
1376177_at	similar to RIKEN cDNA 5730593F17	LOC497983	1.52242
1376645_at	Similar to RIKEN cDNA 6330406I15 (predicted)	---	1.52116
1386962_at	phospholipase C, beta 4	Plcb4	1.52114
1382481_a_at	a disintegrin and metalloprotease domain 33 (predicted)	Adam33_predicted	1.52024
1383862_at	Transcribed locus	---	1.51928
1393045_at	Rho-associated coiled-coil forming kinase 2	---	1.51601
1387422_at	peptidoglycan recognition protein 1	Pglyrp1	1.51583
1375266_at	Transcribed sequence with strong similarity to protein sp:P00722 (E. coli) BGAL_ECOLI Beta-galactosidase	---	1.51564
1383895_at	dynein, cytoplasmic, light chain 2B (predicted)	Dncl2b_predicted	1.51557
1375894_at	leucine zipper transcription factor-like 1 (predicted)	Lztfl1_predicted	1.51403
1378198_at	Transcribed locus	---	1.51053
1390789_at	similar to 5730439E10Rik protein (predicted)	RGD1306270_predicted	1.50834
1398508_at	similar to polyglutamine-containing protein (predicted)	RGD1310994_predicted	1.50699
1369081_at	neuraminidase 1	Neu1	1.5066
1383199_at	Friend leukemia integration 1 (predicted)	---	1.50444
1370820_at	F-box only protein 6b	Fbxo6b	1.50233
1375916_at	Similar to RIKEN cDNA 5330414D10 (predicted)	---	1.5001
1383224_at	par-6 (partitioning defective 6) homolog beta (C. elegans) (predicted)	Pard6b_predicted	1.49666
1389404_at	forkhead-like 18 (Drosophila) (predicted)	Fkhl18_predicted	1.49627
1381341_at	UI-R-BJ1-avx-h-07-0-UI.s1 UI-R-BJ1 Rattus norvegicus cDNA clone UI-R-BJ1-avx-h-07-0-UI 3', mRNA sequence.	---	1.49441
1386229_at	similar to CBF1 interacting corepressor (predicted)	RGD1309199_predicted	1.49397
1387127_at	attractin	Atrn	1.49348
1371799_at	glucosidase, alpha, acid	Gaa	1.49258
1376776_at	similar to RIKEN cDNA 5330440M15 /// similar to hypothetical protein FLJ33084	LOC313519 /// LOC500529	1.49163
1383327_at	Transcribed sequence with moderate similarity to protein pir:JC5193 (H.sapiens) JC5193 nuclear protein H731 - human	---	1.49013
1372709_at	B-cell receptor-associated protein BAP29	Bcap29	1.48772
1385349_at	centrin 4 (predicted)	Cetn4_predicted	1.48651
1390497_at	Transcribed locus	---	1.48466
1385158_at	Transcribed locus	---	1.48432
1371325_at	protective protein for beta-galactosidase (predicted)	Ppgb_predicted	1.48407
1382874_at	similar to N-acetylneuraminate pyruvate lyase	LOC304860	1.4832
1390987_at	Transcribed locus	---	1.48262
1381533_at	Rho family GTPase 1 (predicted)	Rnd1_predicted	1.48254
1371651_at	protein kinase, lysine deficient 4	---	1.48127
1382105_at	guanine nucleotide binding protein, beta 5	Gnb5	1.48092
1393249_at	Friend leukemia integration 1 (predicted)	---	1.47867
1383623_at	thymocyte protein thy28	MGC72984	1.47706
1373117_at	ubiquitin-like, containing PHD and RING finger domains 2 (predicted)	Uhrf2_predicted	1.47652
1367677_at	peroxiredoxin 5	Prdx5	1.47567
1387843_at	follistatin	Fst	1.47504
1393119_at	Transcribed locus	---	1.47482
1373013_at	similar to polyadenylate-binding protein-interacting protein 2	LOC361309	1.47446
1389166_at	calcium and integrin binding family member 2 (predicted)	Cib2_predicted	1.4743
1371150_at	cyclin D1	Ccnd1	1.46979
1372473_at	tight junction protein 1 (predicted)	Tjp1_predicted	1.46946
1378446_at	Transcribed sequences	---	1.46852
1372585_at	LOC499318	LOC499318	1.46421
1372725_at	similar to phospholipid scramblase 2	LOC315883	1.46343
1389419_at	Transcribed locus	---	1.45989
1383769_at	Bone morphogenic protein receptor, type II (serine/threonine kinase)	Bmpr2	1.45973
1399030_at	similar to DNA segment, Chr X, Immunex 38, expressed	LOC302559	1.45743
1376727_at	similar to RIKEN cDNA 2310034L04 (predicted)	RGD1310157_predicted	1.45653
1384148_at	UI-R-DK0-cdx-h-11-0-UI.s1 UI-R-DK0 Rattus norvegicus cDNA clone UI-R-DK0-cdx-h-11-0-UI 3', mRNA sequence.	---	1.45648
1383025_at	meningioma expressed antigen 5 (hyaluronidase)	---	1.45642
1367899_at	coagulation factor II (thrombin) receptor	F2r	1.45588
1373504_at	GLI pathogenesis-related 1 (glioma) (predicted)	Glipr1_predicted	1.45583
1370047_at	ectonucleotide pyrophosphatase/phosphodiesterase 1	Enpp1	1.45466
1388883_at	polymerase (DNA-directed), delta 4 (predicted)	Pold4_predicted	1.45132
1398246_s_at	Fc receptor, IgG, low affinity III /// Fc gamma receptor II beta	Fcgr3 /// LOC498276	1.44922
1388185_at	retinoblastoma 1	Rb1	1.44888
1391433_at	mitochondrial acyl-CoA thioesterase 1	Mte1	1.44794
1371419_at	spectrin beta 2	Spnb2	1.44792
1388773_at	similar to [Mouse primary response gene B94 mRNA, 3end.], gene product	LOC299339	1.44777
1373566_at	NADH dehydrogenase (ubiquinone) 1 beta subcomplex, 6, 17kDa (predicted)	---	1.44757
1370351_at	tudor domain containing 7	Tdrd7	1.44557
1372599_at	microsomal glutathione S-transferase 2 (predicted)	Mgst2_predicted	1.44554
1372133_at	related RAS viral (r-ras) oncogene homolog 2 (predicted)	Rras2_predicted	1.44508
1377188_at	Transcribed sequences	---	1.44468
1393919_at	similar to RIKEN cDNA 4933405A16 (predicted)	RGD1305778_predicted	1.44381
1398099_at	Synaptotagmin 12	Syt12	1.44269
1388729_at	Harvey rat sarcoma oncogene, subgroup R (predicted)	Rras_predicted	1.44071
1370314_at	solute carrier family 20 (phosphate transporter), member 1	Slc20a1	1.44046
1398332_at	LOC498118	LOC498118	1.44008
1389367_at	schwannomin interacting protein 1 (predicted)	Schip1_predicted	1.43985
1374196_at	lanC (bacterial lantibiotic synthetase component C)-like 1	Lancl1	1.43975
1371337_at	cytochrome c oxidase subunit VIIa polypeptide 2 like (predicted)	Cox7a2l_predicted	1.43974
1367826_at	nuclear factor, erythroid derived 2, like 2	Nfe2l2	1.43945
1389600_at	similar to RIKEN cDNA 1700001E04 /// similar to RIKEN cDNA 1700001E04 /// similar to RIKEN cDNA 1700001E04 /// hypothetical protein LOC363306 /// similar to RIKEN cDNA 1700001E04 /// similar to RIKEN cDNA 1700001E04 /// similar to RIKEN cDNA 1700001E04 /// similar to RIKEN cDNA 1700001E04 /// similar to RIKEN cDNA 4930555G01 /// similar to RIKEN cDNA 2610042L04 /// similar to cDNA sequence AY3580…	LOC301748 /// LOC316186 /// LOC360998 /// LOC363306 /// LOC363320 /// LOC363433 /// LOC498374 /// LOC501091 /// LOC501092 /// LOC501093 /// LOC501221 /// LOC501225 /// LOC501226 /// LOC501245 /// LOC501250 /// LOC501253 /// LOC501393 /// LOC501396 /// LOC501399	1.43906
1387493_at	A kinase (PRKA) anchor protein 5	Akap5	1.43905
1379429_at	Transcribed locus	---	1.43792
1390128_at	Similar to CHMP1.5 protein (LOC364890), mRNA	---	1.43665
1375049_at	latent transforming growth factor beta binding protein 3	---	1.4356
1380229_at	Transcribed locus	---	1.43465
1375346_at	similar to hypothetical protein FLJ20010	LOC500993	1.4332
1378936_at	Transcribed locus	---	1.42987
1392755_at	similar to hypothetical protein AD158 (predicted)	RGD1306585_predicted	1.42719
1399019_at	abhydrolase domain containing 4 (predicted)	Abhd4_predicted	1.42684
1395551_at	Transcribed locus	---	1.42468
1372124_at	eukaryotic translation initiation factor 4B (predicted)	Eif4b_predicted	1.42434
1394059_s_at	YME1-like 1 (S. cerevisiae)	Yme1l1	1.42133
1372497_at	similar to Nbr1 (predicted)	RGD1311421_predicted	1.41974
1374680_at	Transcribed sequences	---	1.41865
1379887_at	similar to chromosome 2 open reading frame 3; transcription factor 9 (binds GC-rich sequences) (predicted)	RGD1304792_predicted	1.41795
1368549_at	high mobility group box transcription factor 1	Hbp1	1.41724
1383246_at	Similar to 5(3)-deoxyribonucleotidase	---	1.41632
1382225_at	Transcribed locus, weakly similar to XP_488675.1 hypothetical protein XP_488675 [Mus musculus]	---	1.41513
1379544_at	Transcribed sequences	---	1.41462
1372475_at	PTEN induced putative kinase 1 (predicted)	Pink1_predicted	1.41336
1399026_at	similar to polyadenylate-binding protein-interacting protein 2	LOC361309	1.4119
1388427_at	limitrin	1200013a08rik	1.41134
1390386_at	caspase 3	Casp3	1.41079
1390914_at	Friend leukemia integration 1 (predicted)	Fli1_predicted	1.41066
1377572_at	similar to UDP-glucose ceramide glucosyltransferase-like 2	LOC361091	1.4078
1368064_a_at	dopa decarboxylase	Ddc	1.40618
1371334_at	integral membrane protein 2C (predicted)	Itm2c_predicted	1.40495
1386325_at	nag13a12.x1 NCI_CGAP_Emb2 Rattus norvegicus cDNA clone IMAGE:4175926 3', mRNA sequence.	---	1.40203
1371357_at	insulin-like growth factor binding protein 7 (predicted)	Igfbp7_predicted	1.4018
1393028_at	Transcribed locus	---	1.40147
1368463_at	vascular endothelial growth factor C	Vegfc	1.40088
1394434_at	Protein phosphatase 2 (formerly 2A), regulatory subunit A (PR 65), beta isoform (predicted)	---	1.40083
1388903_at	T-complex associated-testis-expressed 1-like (Protein 91/23) /// similar to T-complex associated-testis-expressed 1-like (Protein 91/23)	Tcte1l /// LOC501521	1.40076
1376648_at	v-myc myelocytomatosis viral related oncogene, neuroblastoma derived (avian)	Mycn	1.40019
1370199_at	nucleobindin 1	Nucb1	1.39997
1383288_at	Transformed mouse 3T3 cell double minute 2 (predicted)	---	1.39869
1387991_at	calpain 8	Capn8	1.39813
1383942_at	Transcribed locus, strongly similar to NP_079940.2 sorting nexin 9 [Mus musculus]	---	1.39629
1388597_at	Similar to C protein (LOC295929), mRNA	---	1.39625
1372946_at	similar to RIKEN cDNA 1110012L19	LOC292328	1.3961
1389525_at	ring finger protein 149 (predicted)	Rnf149_predicted	1.39579
1374254_a_at	hypothetical LOC300441	LOC300441	1.39416
1388751_at	RNA binding motif protein 24 (predicted)	Rbm24_predicted	1.39412
1377025_at	kinesin family member 3a	Kif3a	1.39323
1388712_at	pleckstrin homology, Sec7 and coiled/coil domains 3	---	1.39276
1379904_at	Similar to hypothetical protein MGC2650 (LOC292693), mRNA	---	1.39226
1390839_at	similar to RIKEN cDNA E030024M05 (predicted)	RGD1306818_predicted	1.39202
1388307_at	tumor differentially expressed 1, like	Tde2	1.39101
1380310_at	Similar to hypothetical protein FLJ14007 (predicted)	---	1.39057
1396145_at	Transcribed locus, weakly similar to XP_376339.2 PREDICTED: HCV F-transactivated protein 1 [Homo sapiens]	---	1.38937
1393273_at	Transcribed locus, weakly similar to XP_484812.1 hypothetical protein XP_484812 [Mus musculus]	---	1.38704
1390876_at	similar to KIAA0377-like protein (predicted)	RGD1311552_predicted	1.38687
1391456_at	junctional adhesion molecule 3	RGD:1303248	1.38673
1368470_at	gamma-glutamyl hydrolase	Ggh	1.38529
1392472_at	similar to myocyte enhancer factor 2C	LOC309957	1.38525
1384185_at	similar to RIKEN cDNA 2410016O06 (predicted)	RGD1307704_predicted	1.38521
1382058_at	related RAS viral (r-ras) oncogene homolog 2 (predicted)	Rras2_predicted	1.38405
1390793_at	similar to osmosis responsive factor	LOC294774	1.38315
1368726_a_at	gonadotropin inducible ovarian transcription factor 2	RGD:620185	1.38286
1390502_at	similar to RIKEN cDNA 1700025G04 gene (predicted)	RGD1309104_predicted	1.38125
1396058_at	Transcribed locus	---	1.38109
1381937_at	similar to 60S ribosomal protein L7a	LOC499344	1.38078
1380357_a_at	Transcribed locus	---	1.37991
1372691_at	Uridine phosphorylase 1 (predicted)	---	1.37985
1371338_at	similar to RIKEN cDNA 1700023M09 (predicted)	RGD1312037_predicted	1.37812
1392044_at	Transcribed sequences	---	1.37791
1385869_at	Zinc finger protein 281 (predicted)	---	1.37773
1375003_at	serine (or cysteine) peptidase inhibitor, clade B, member 6	Serpinb6	1.3773
1391674_at	Transcribed locus	---	1.37613
1377702_at	Transcribed sequence with strong similarity to protein sp:P43657 (H.sapiens) P2Y5_HUMAN P2Y purinoceptor 5	---	1.37605
1389790_at	Transcribed locus	---	1.37469
1368174_at	hypothetical gene supported by NM_019371	LOC497816	1.37446
1372281_at	lysophospholipase-like 1 (predicted)	Lyplal1_predicted	1.37436
1372112_at	similar to 9230105E10Rik protein (predicted)	RGD1304579_predicted	1.3742
1377618_at	Kruppel-like factor 7 (ubiquitous) (predicted)	Klf7_predicted	1.37396
1372947_at	plastin 3 (T-isoform)	Pls3	1.3734
1382013_at	RNA binding motif protein 24 (predicted)	Rbm24_predicted	1.37156
1386282_x_at	SNF related kinase /// hypothetical gene supported by NM_138833	Snrk /// LOC367880	1.37147
1372794_at	death-associated kinase 2 (predicted)	Dapk2_predicted	1.37116
1373847_at	transmembrane 4 superfamily member 1 (predicted)	Tm4sf1_predicted	1.37053
1382623_at	Ras homolog enriched in brain like 1	Rhebl1	1.36927
1371131_a_at	upregulated by 1,25-dihydroxyvitamin D-3	Txnip	1.36895
1368541_at	embigin	Emb	1.36882
1372347_at	Transcribed locus	---	1.36812
1372887_at	scavenger receptor class F, member 2 (predicted)	Scarf2_predicted	1.36809
1368223_at	a disintegrin-like and metalloprotease (reprolysin type) with thrombospondin type 1 motif, 1	Adamts1	1.3667
1370245_at	cathepsin L	Ctsl	1.36576
1368914_at	runt related transcription factor 1	Runx1	1.36566
1371044_at	phosphodiesterase 7A	Pde7a	1.36477
1383576_at	Protein phosphatase 1, regulatory (inhibitor) subunit 12A	Ppp1r12a	1.36326
1389511_s_at	Synaptogyrin 1	Syngr1	1.36301
1379910_at	similar to UDP-N-acteylglucosamine pyrophosphorylase 1 homolog	LOC498272	1.36263
1373270_at	similar to D11Ertd498e protein (predicted)	RGD1307754_predicted	1.36242
1375033_at	carnitine palmitoyltransferase 1c (predicted)	Cpt1c_predicted	1.36223
1391643_at	Transcribed sequences	---	1.3612
1382642_at	zinc finger protein 281 (predicted)	Zfp281_predicted	1.36005
1375573_at	Myeloid/lymphoid or mixed-lineage leukemia 5 (trithorax homolog, Drosophila) (predicted)	---	1.35973
1367595_s_at	beta-2 microglobulin	B2m	1.3595
1368096_at	Ras-related GTP-binding protein Rab29	Rab7l1	1.35857
1380598_at	Similar to SPIRE2 protein	---	1.35842
1384428_at	similar to OTTHUMP00000040081	LOC502228	1.3584
1387812_at	Subtilisin - like endoprotease	Pace4	1.35819
1391489_at	interferon inducible protein 1 (predicted)	Ifi1_predicted	1.3574
1369942_at	actinin alpha 4	Actn4	1.35691
1382436_at	similar to RIKEN cDNA 2610002M06	LOC363487	1.35524
1377647_at	sex comb on midleg homolog 1 (predicted)	Scmh1_predicted	1.35496
1377719_a_at	EST196568 Normalized rat kidney, Bento Soares Rattus sp. cDNA clone RKIAX04 3' end, mRNA sequence.	---	1.35471
1397540_at	Transcribed sequences	---	1.35392
1390207_at	Transcribed locus	---	1.35309
1382112_at	Transcribed locus	---	1.35252
1387405_at	GTPase activating RANGAP domain-like 1	Garnl1	1.35115
1368869_at	A kinase (PRKA) anchor protein (gravin) 12	Akap12	1.35098
1372748_at	similar to KIAA1055 protein (predicted)	RGD1307436_predicted	1.35088
1389705_at	similar to recombination activating gene 1 gene activation (predicted)	RGD1308478_predicted	1.35057
1380297_at	Transcribed sequences	---	1.35009
1379294_at	Transcribed locus	---	1.34961
1376013_at	similar to mKIAA0227 protein	LOC500689	1.34796
1376187_at	Transcribed locus	---	1.34709
1373077_at	similar to hypothetical protein D11Ertd497e (predicted)	RGD1308696_predicted	1.34672
1395725_at	similar to intracellular membrane-associated calcium-independent phospholipase A2 gamma (predicted)	RGD1311444_predicted	1.34617
1374413_at	ubiquitin-like 3 (predicted)	Ubl3_predicted	1.34594
1367850_at	Fc gamma receptor II beta	LOC498276	1.34485
1372557_at	ADP-ribosylation factor-like 6 (predicted)	Arl6_predicted	1.34473
1398432_at	similar to Ankyrin repeat domain protein 28	LOC306264	1.34344
1389732_at	Transcribed locus, strongly similar to NP_082154.2 RIKEN cDNA 1200002N14 [Mus musculus]	---	1.34343
1373216_at	LOC363097 (LOC363097), mRNA	---	1.34311
1385559_at	Transcribed sequences	---	1.34047
1382334_at	Transcribed locus	---	1.34027
1371595_at	Transcribed locus	---	1.33862
1388845_at	SV2 related protein	Svop	1.33764
1371547_at	similar to C10 (predicted)	RGD1309695_predicted	1.33731
1376828_at	retinoic acid induced 3 (predicted)	Rai3_predicted	1.33667
1385110_at	Transcribed sequences	---	1.33622
1376658_at	Transcribed locus	---	1.3336
1367721_at	syndecan 4	Sdc4	1.33354
1388763_at	Transcribed locus, strongly similar to NP_031751.1 calponin 2; h2-calponin [Mus musculus]	---	1.33298
1387766_a_at	retinol binding protein 2, cellular	Rbp2	1.33296
1383875_at	uroplakin 1B (predicted)	Upk1b_predicted	1.33271
1382115_at	similar to RIKEN cDNA 4930521E07 (predicted)	RGD1305166_predicted	1.3317
1391304_at	similar to Ubr2 protein	LOC363190	1.33139
1398762_at	syndecan binding protein	Sdcbp	1.3308
1382045_at	TBC1 domain family, member 15 (predicted)	Tbc1d15_predicted	1.33014
1378413_at	Transcribed sequences	---	1.32844
1373826_at	Similar to Yippee homolog (CGI-127) (LOC298792), mRNA	---	1.32817
1389919_at	parvin, beta (predicted)	Parvb_predicted	1.32804
1397916_s_at	protein tyrosine phosphatase, non-receptor type 1	Ptpn1	1.32746
1371006_at	jagged 2	Jag2	1.32626
1372304_at	COMM domain containing 4 (predicted)	Commd4_predicted	1.32462
1371636_at	Similar to novel protein	---	1.32365
1374204_at	WD repeat and SOCS box-containing 1 (predicted)	---	1.32345
1373421_at	TG interacting factor (predicted)	Tgif_predicted	1.32332
1367922_at	a disintegrin and metalloproteinase domain 17 (tumor necrosis factor, alpha, converting enzyme)	Adam17	1.32299
1367570_at	transgelin	Tagln	1.32285
1388799_at	kelch-like 7 (Drosophila) (predicted)	Klhl7_predicted	1.32256
1374293_at	Transcribed sequence with strong similarity to protein sp:Q93077 (H.sapiens) H2AL_HUMAN Histone H2A.l	---	1.32139
1374770_at	N-acylsphingosine amidohydrolase 1	Asah1	1.32132
1374741_at	Estrogen related receptor, alpha	Esrra	1.32115
1376801_at	hypothetical LOC294291	LOC294291	1.32089
1390474_at	similar to RIKEN cDNA 9330161F08	LOC362899	1.31772
1382028_at	similar to PxF protein	LOC289233	1.3176
1373045_at	potassium channel tetramerisation domain containing 13	Kctd13	1.31609
1372282_at	similar to RIKEN cDNA 2310016C16 (predicted)	RGD1307506_predicted	1.31515
1383161_a_at	EST203097 Normalized rat embryo, Bento Soares Rattus sp. cDNA clone REMBB18 3' end, mRNA sequence.	---	1.31393
1383764_at	cysteine-rich hydrophobic domain 2	---	1.31345
1393428_at	Transcribed locus	---	1.3134
1399059_at	Enhancer of zeste homolog 1 (Drosophila) (predicted)	---	1.31192
1383142_at	Similar to hypothetical protein MGC38024 (predicted)	---	1.31166
1398926_at	prefoldin 1 (predicted)	Pfdn1_predicted	1.31065
1373869_at	sterol O-acyltransferase 1	Soat1	1.30887
1377854_at	similar to hypothetical protein FLJ23375 (predicted)	RGD1305647_predicted	1.30826
1368290_at	cysteine rich protein 61	Cyr61	1.30799
1397174_at	Transcribed locus	---	1.30758
1370807_at	vacuole membrane protein 1	Vmp1	1.30721
1383369_at	tripartite motif protein 26	Trim26	1.30624
1370902_at	aldo-keto reductase family 1, member B8	Akr1b8	1.30586
1379768_at	Transcribed locus	---	1.30565
1381972_at	cereblon (predicted)	Crbn_predicted	1.30539
1383061_at	Transcribed locus	---	1.30485
1372149_at	AU RNA binding protein/enoyl-coenzyme A hydratase (predicted)	Auh_predicted	1.30395
1394000_at	UI-R-CN1-cjm-k-11-0-UI.s1 UI-R-CN1 Rattus norvegicus cDNA clone UI-R-CN1-cjm-k-11-0-UI 3', mRNA sequence.	---	1.30386
1375642_at	ubiquitin-conjugating enzyme E2B, RAD6 homolog (S. cerevisiae)	Ube2b	1.3028
1368215_at	ceroid-lipofuscinosis, neuronal 2	Cln2	1.30242
1388725_at	leptin receptor overlapping transcript	Leprot	1.30235
1377102_at	similar to cDNA sequence BC014795 (predicted)	RGD1306829_predicted	1.30174
1398572_at	RNA (guanine-7-) methyltransferase (predicted)	Rnmt_predicted	1.30149
1368146_at	dual specificity phosphatase 1	Dusp1	1.30039
1368153_a_at	nasal embryonic LHRH factor	Nelf	1.29991
1378753_at	thiopurine methyltransferase	Tpmt	1.29938
1367800_at	plasminogen activator, tissue	Plat	1.29868
1389564_at	Similar to cyclin L1; cyclin L ania-6a (LOC298686), mRNA	---	1.29852
1370244_at	cathepsin L	Ctsl	1.29811
1372176_at	protein kinase C, alpha	Prkca	1.29661
1392886_a_at	similar to FCRL (predicted)	RGD1306176_predicted	1.29416
1372277_at	Similar to intermediate filament-like protein MGC:2625 isoform 2; HOM-TES-103 tumor antigen-like (predicted)	Tas1r2	1.29311
1372949_at	Transcribed locus, weakly similar to XP_376339.2 PREDICTED: HCV F-transactivated protein 1 [Homo sapiens]	---	1.29295
1389617_at	Similar to NimA-related protein kinase (LOC299204), mRNA	---	1.29139
1375678_at	similar to hypothetical protein DKFZp434P0316	LOC501747	1.29138
1370891_at	CD48 antigen	Cd48	1.29098
1374448_at	reversion-inducing-cysteine-rich protein with kazal motifs (predicted)	Reck_predicted	1.29068
1373835_at	F-box only protein 8 (predicted)	Fbxo8_predicted	1.29013
1383314_at	Similar to BC003277 protein	---	1.28983
1372520_at	myeloid cell leukemia sequence 1	Mcl1	1.28938
1389777_at	similar to RIKEN cDNA 2610028I09	MGC93902	1.28917
1394109_at	Thrombospondin 2 (predicted)	TSP-2	1.28878
1371854_at	Transcribed sequences	---	1.28773
1383319_at	solute carrier family 4, sodium bicarbonate transporter-like, member 11 (predicted)	Slc4a11_predicted	1.28727
1373867_at	Transcribed locus	---	1.28664
1372606_at	Transcribed locus	---	1.2862
1376591_a_at	Similar to RIKEN cDNA 1810059G22 (LOC309193), mRNA	---	1.28528
1396123_at	Similar to RIKEN cDNA 0610012D17 (LOC288044), mRNA	---	1.28463
1371645_at	stromal cell derived factor 2 (predicted)	Sdf2_predicted	1.28397
1380470_x_at	UI-R-BX0-asc-c-04-0-UI.s1 UI-R-BX0 Rattus norvegicus cDNA clone UI-R-BX0-asc-c-04-0-UI 3', mRNA sequence.	---	1.28341
1391537_at	similar to SERTA domain containing 4	LOC360899	1.2826
1372907_at	ATPase, H+ transporting, V0 subunit E isoform 2	Atp6v0e2	1.28251
1388542_at	similar to RIKEN cDNA 2010315L10 (predicted) /// similar to 2010315L10Rik protein	RGD1306660_predicted /// LOC292282	1.28221
1372779_at	UDP-GlcNAc:betaGal beta-1,3-N-acetylglucosaminyltransferase 1 (predicted)	---	1.28092
1399032_at	excision repair cross-complementing rodent repair deficiency, complementation group 1 (predicted)	Ercc1_predicted	1.28065
1367765_at	transcobalamin 2	Tcn2	1.28032
1376814_at	Transcribed locus	---	1.28021
1387190_at	diacylglycerol kinase, alpha (80 kDa)	Dgka	1.27888
1372846_at	similar to hypothetical protein MGC20446 (predicted)	RGD1304670_predicted	1.2787
1374109_at	diacylglycerol kinase, theta (predicted)	Dgkq_predicted	1.27813
1387008_at	sideroflexin 3	Sfxn3	1.27758
1398961_at	CDNA clone MGC:93748 IMAGE:7108181	---	1.27743
1388342_at	Transcribed locus	---	1.27708
1387875_at	PTK2 protein tyrosine kinase 2	Ptk2	1.27705
1388137_a_at	zygin-related protein	RGD:628711	1.2768
1367657_at	B-cell translocation gene 1, anti-proliferative	Btg1	1.27515
1388071_x_at	RT1 class Ib, locus Aw2	RT1-Aw2	1.27393
1389142_at	Pallidin (predicted)	---	1.27354
1372377_at	DEAD (Asp-Glu-Ala-Asp) box polypeptide 41 (predicted)	Ddx41_predicted	1.27327
1371527_at	epithelial membrane protein 1	Emp1	1.27326
1383281_at	similar to RIKEN cDNA 1110005A03 (predicted)	RGD1306284_predicted	1.27316
1367664_at	ankyrin repeat domain 1 (cardiac muscle)	Ankrd1	1.27252
1397442_at	Transcribed sequence with strong similarity to protein sp:Q9R0N5 (M.musculus) SYT5_MOUSE Synaptotagmin V	---	1.2713
1391407_at	Ephrin A5	Efna5	1.27078
1391688_at	Mitogen-activated protein kinase kinase kinase 14 (predicted)	---	1.2702
1371930_at	glutaminyl-tRNA synthetase /// similar to glutaminyl-tRNA synthetase	Qars /// LOC501055	1.27005
1373227_at	Transcribed sequence with strong similarity to protein pir:JC5022 (H.sapiens) JC5022 UDP-galactose transporter, splice form 2 - human	---	1.26928
1368379_at	CD36 antigen (collagen type I receptor, thrombospondin receptor)-like 2	Scarb2	1.26904
1371921_at	catenin (cadherin-associated protein), alpha 1, 102kDa	Catna1	1.26867
1368080_at	response gene to complement 32	Rgc32	1.26855
1398814_at	RAB11a, member RAS oncogene family	Rab11a	1.26642
1373145_at	similar to Vps41 protein	LOC306991	1.26564
1367787_at	islet cell autoantigen 1	Ica1	1.26501
1369973_at	xanthine dehydrogenase /// hypothetical gene supported by NM_017154	Xdh /// LOC497811	1.26498
1371393_at	Similar to calsyntenin-1 protein (LOC313717), mRNA	---	1.26466
1399022_at	CDC-like kinase 1 (predicted)	Clk1_predicted	1.26457
1388800_at	RAB5A, member RAS oncogene family	Rab5a	1.26384
1380717_at	Transcribed sequences	---	1.2598
1368311_at	O-6-methylguanine-DNA methyltransferase	Mgmt	1.25972
1398847_at	nudix (nucleoside diphosphate linked moiety X)-type motif 4	Nudt4	1.25891
1393052_at	Transcribed locus	---	1.25873
1398622_at	Cysteine-rich motor neuron 1 (predicted)	---	1.25825
1382284_at	NIMA (never in mitosis gene a)-related expressed kinase 3 (predicted)	Nek3_predicted	1.25823
1396872_at	Transcribed locus	---	1.25815
1379342_at	similar to hypothetical protein FLJ20531 (predicted)	RGD1306740_predicted	1.25769
1394068_x_at	Kruppel-like factor	Klf2	1.25731
1389708_at	similar to RIKEN cDNA 5730421E18 (predicted)	RGD1310006_predicted	1.25634
1367832_at	lysophospholipase 1	Lypla1	1.25625
1376673_at	Transcription factor 8 (represses interleukin 2 expression)	Tcf8	1.25598
1375217_at	Meningioma expressed antigen 5 (hyaluronidase)	Mgea5	1.25535
1388995_at	Transcribed locus	---	1.25416
1395489_at	similar to CG15118-PB (predicted)	RGD1309156_predicted	1.25344
1390298_at	Sorting nexin associated golgi protein 1 (predicted)	---	1.25339
1373040_at	eukaryotic translation initiation factor 3, subunit 5 (epsilon) (predicted)	Eif3s5_predicted	1.25278
1368843_at	YME1-like 1 (S. cerevisiae)	Yme1l1	1.25241
1388390_at	eukaryotic translation initiation factor 3, subunit 3 (gamma)	Eif3s3	1.25189
1393922_at	similar to CDNA sequence BC020077	LOC362549	1.25108
1393654_at	Nei endonuclease VIII-like 1 (E. coli) (predicted)	---	1.2508
1368910_at	protein phosphatase 2C, magnesium-dependent, catalytic subunit	Ppm2c	1.25014
1379699_at	Similar to FLJ20689 (predicted)	---	1.24988
1392627_x_at	UI-R-CU0s-cbw-f-12-0-UI.s1 UI-R-CU0s Rattus norvegicus cDNA clone UI-R-CU0s-cbw-f-12-0-UI 3', mRNA sequence.	---	1.24973
1387063_at	inositol hexaphosphate kinase 2	Ihpk2	1.24929
1388126_at	multiple inositol polyphosphate histidine phosphatase 1	Minpp1	1.24918
1377662_at	pirin	Pir	1.2486
1380257_at	SMC5 structural maintenance of chromosomes 5-like 1 (yeast) (predicted)	Smc5l1_predicted	1.24822
1371768_at	Similar to HSPC182 protein (predicted)	---	1.24746
1389355_at	immediate early response 5	Ier5	1.24607
1390547_at	Sialyltransferase 7 ((alpha-N-acetylneuraminyl 2,3-beta-galactosyl-1,3)-N-acetyl galactosaminde alpha-2,6-sialyltransferase) A	Siat7A	1.24585
1370010_at	lysosomal membrane glycoprotein 2	Lamp2	1.24464
1388408_at	similar to RIKEN cDNA 1110020C13 (predicted)	RGD1307129_predicted	1.24442
1388705_at	similar to selenoprotein SelM	LOC498398	1.24434
1381984_at	Transcribed locus	---	1.24422
1381421_at	Similar to putative endoplasmic reticulum multispan transmembrane protein (LOC290552), mRNA	---	1.24403
1388607_at	Transcribed locus	---	1.24345
1383544_at	FCH and double SH3 domains 1 (predicted)	Fchsd1_predicted	1.24241
1372604_at	similar to RIKEN cDNA 2210421G13	LOC315106	1.2421
1389527_at	promethin	RGD:727895	1.23983
1389325_at	similar to programmed cell death 10	MGC72992	1.23967
1372193_at	imprinted and ancient	Impact	1.23942
1372417_at	SERTA domain containing 1	Sertad1	1.23829
1370490_at	protocadherin 3 /// hypothetical gene supported by NM_173099	Pcdh3 /// LOC497721	1.23813
1373861_at	Nedd4 family interacting protein 2 (predicted)	Ndfip2_predicted	1.23797
1398347_at	AXL receptor tyrosine kinase (predicted)	Axl_predicted	1.23748
1384366_at	COP9 (constitutive photomorphogenic) homolog, subunit 2 (Arabidopsis thaliana)	Cops2	1.2371
1371320_at	integral membrane protein 2B	Itm2b	1.23679
1388764_at	Transcribed locus	---	1.23559
1367722_at	dipeptidylpeptidase 7	Dpp7	1.23536
1390709_at	Transcribed locus	---	1.23455
1368004_at	mitochondrial ribosomal protein L23	Mrpl23	1.23414
1398244_at	GCIP-interacting protein p29	Gcipip	1.23413
1387185_at	amyloid beta (A4) precursor protein-binding, family B, member 3	Apbb3	1.23356
1390841_at	Transcribed locus	---	1.23213
1371680_at	Similar to gamma-aminobutyric acid (GABA(A)) receptor-associated protein-like 1; GABA(A) receptor-associated protein like 1 (LOC297644), mRNA	---	1.23197
1368863_at	non-metastatic cells 3, protein expressed in	Nme3	1.23193
1399072_at	fibroblast growth factor (acidic) intracellular binding protein	Fibp	1.23188
1383287_at	Similar to semaF cytoplasmic domain associated protein 2	---	1.23056
1369922_at	RDCR-0918-3 protein	RGD:708461	1.22921
1384714_x_at	ribosomal protein L8 /// similar to 60S ribosomal protein L8 /// similar to mitochondrial tryptophanyl tRNA synthetase 2	Rpl8 /// LOC499374 /// LOC499679	1.22826
1371575_at	Moesin	Msn	1.2266
1380650_at	TRIO and F-actin binding protein (predicted)	Triobp_predicted	1.22625
1379262_at	acyl-Coenzyme A thioesterase 2, mitochondrial	Acate2	1.22575
1371394_x_at	similar to Ab2-143	LOC498989	1.22519
1379520_at	Transcribed locus	---	1.2251
1386860_at	milk fat globule-EGF factor 8 protein	Mfge8	1.22311
1382930_at	Transcribed locus	---	1.2231
1398780_at	Rab acceptor 1 (prenylated)	Rabac1	1.2222
1374545_at	ring finger and KH domain containing 2 (predicted)	Rkhd2_predicted	1.22201
1392524_at	tripartite motif protein 23	Trim23	1.22193
1367512_at	Similar to RIKEN cDNA 2210412K09 (predicted)	LOC297995	1.22146
1398341_at	hypothetical LOC287661	LOC287661	1.22138
1390027_at	ubiquitin specific protease 8 (predicted)	Usp8_predicted	1.22071
1384290_at	Similar to RIKEN cDNA C030034J04 (LOC361642), mRNA	---	1.22032
1382007_at	SH3-domain GRB2-like B1 (endophilin) (predicted)	Sh3glb1_predicted	1.21989
1374440_at	dehydrogenase/reductase (SDR family) member 8	RGD:1303235	1.21971
1399094_at	churchill domain containing 1 (predicted)	Churc1_predicted	1.21828
1369669_at	neurolysin (metallopeptidase M3 family)	Nln	1.21827
1377644_at	similar to RIKEN cDNA 4921524J17 (predicted)	RGD1308706_predicted	1.21827
1396360_at	Transcribed locus, strongly similar to NP_033788.2 aldo-keto reductase family 1, member B3 (aldose reductase); aldehyde reductase 1; aldo-keto reductase family 1, member B1 (aldose reductase) [Mus musculus]	---	1.21734
1393276_at	similar to CGI-125 protein (predicted)	RGD1309457_predicted	1.21678
1399012_at	similar to RIKEN cDNA 1110001M20 (predicted)	RGD1310313_predicted	1.21631
1383376_at	similar to Williams-Beuren syndrome critical region protein 18	LOC368190	1.21501
1372004_at	heme binding protein 1 (predicted)	Hebp1_predicted	1.21471
1376455_at	similar to 2310010G13Rik protein	MGC114471	1.2143
1368292_at	dynamin 1	Dnm1	1.21409
1369698_at	ATP-binding cassette, sub-family C (CFTR/MRP), member 3	Abcc3	1.2137
1389591_at	Similar to HS1 binding protein 3 (predicted)	---	1.21305
1399150_at	similar to RIKEN cDNA A630054L15; hypothetical protein MGC38041 (predicted)	RGD1306064_predicted	1.21304
1374625_at	hairy and enhancer of split 6 (Drosophila) (predicted)	Hes6_predicted	1.21247
1372905_at	Transcribed sequence with moderate similarity to protein sp:P00722 (E. coli) BGAL_ECOLI Beta-galactosidase	---	1.2122
1377048_at	CDNA clone IMAGE:7115952, containing frame-shift errors	---	1.21056
1390392_at	similar to RIKEN cDNA 2500001K11 (predicted)	RGD1309602_predicted	1.21019
1372362_at	similar to N-acetylgalactosamine kinase (GalNAc kinase) (Galactokinase 2)	LOC296117	1.20913
1372854_at	tetratricopeptide repeat domain 17 (predicted)	Ttc17_predicted	1.20864
1375874_at	similar to cDNA sequence BC013529 (predicted)	RGD1309759_predicted	1.20851
1378061_at	Similar to WD repeat domain 10 isoform 2 (LOC312651), mRNA	---	1.20809
1399045_at	UDP-N-acetyl-alpha-D-galactosamine:polypeptide N-acetylgalactosaminyltransferase 1	Galnt1	1.20746
1373044_at	similar to Dendritic cell protein GA17	LOC295975	1.20564
1367476_at	signal recognition particle 14 (predicted)	Srp14_predicted	1.20503
1376894_at	pallidin (predicted)	Pldn_predicted	1.20465
1395645_at	Transcribed sequences	---	1.20406
1379323_at	similar to hypothetical protein MGC14327 (predicted)	RGD1306304_predicted	1.20362
1370928_at	LPS-induced TNF-alpha factor	RGD:69294	1.2026
1371946_at	kidney predominant protein NCU-G1	RGD:1303130	1.20197
1383686_at	synaptogyrin 1	---	1.20158
1382955_at	Transcribed locus	---	1.20135
1369122_at	Bcl2-associated X protein	Bax	1.20002
1371581_at	Vascular endothelial zinc finger 1 (predicted)	---	-1.20017
1372312_at	similar to hypothetical protein FLJ14909 (predicted)	RGD1311264_predicted	-1.20022
1387028_a_at	Inhibitor of DNA binding 1, helix-loop-helix protein (splice variation)	Id1	-1.20044
1383124_at	Transcribed locus	---	-1.20052
1367584_at	annexin A2	Anxa2	-1.20064
1372659_at	similar to RNA binding motif and ELMO domain 1	LOC500202	-1.20215
1379304_at	similar to PRKR interacting protein 1 (IL11 inducible)	LOC498171	-1.2027
1390382_at	similar to RIKEN cDNA 2310003F16 (predicted)	RGD1311457_predicted	-1.20292
1374233_at	similar to RIKEN cDNA 1810055E12 (predicted)	RGD1308326_predicted	-1.20327
1370360_at	testis specific protein	RGD:621352	-1.20329
1371633_at	beta catenin-like 1	Ctnnbl1	-1.20333
1388875_at	CXXC finger 1 (PHD domain) (predicted)	Cxxc1_predicted	-1.20347
1389178_at	similar to neugrin	LOC499191	-1.2038
1386906_a_at	septin 9	2005-09-09	-1.20412
1385208_at	similar to RIKEN cDNA 2310057M21 (predicted)	RGD1305014_predicted	-1.20445
1376845_at	putative ISG12(b) protein	isg12(b)	-1.20447
1376100_at	Similar to RIKEN cDNA 2310057H16 (predicted)	---	-1.20449
1367883_at	survival of motor neuron 1, telomeric	SMN1	-1.20456
1371920_at	polymerase (DNA-directed), delta interacting protein 2 (predicted)	Poldip2_predicted	-1.2049
1367819_at	glutamate oxaloacetate transaminase 2	Got2	-1.20514
1376941_at	Williams-Beuren syndrome chromosome region 16 (predicted)	Wbscr16_predicted	-1.20517
1374484_at	similar to RIKEN cDNA 2610033C09 (predicted)	RGD1306421_predicted	-1.20561
1371844_at	Similar to hypothetical protein (LOC362013), mRNA	---	-1.20605
1373705_at	similar to Mrpl28 protein	LOC497876	-1.20646
1376703_at	nucleoporin 37 (predicted)	Nup37_predicted	-1.20661
1375686_at	peptidylprolyl isomerase (cyclophilin)-like 3	Ppil3	-1.20672
1379378_at	mitochondrial ribosomal protein S18C (predicted)	Mrps18c_predicted	-1.20672
1382515_at	Similar to cleavage and polyadenylation specificity factor (LOC299256), mRNA	---	-1.20674
1371684_at	pelota homolog	Pelo	-1.20764
1388656_at	Transcribed locus, strongly similar to NP_003330.1 ubiquitin-conjugating enzyme E2D 2 isoform 1; ubiquitin carrier protein; ubiquitin-conjugating enzyme E2-17 kDa 2; ubiquitin-conjugating enzyme E2D 2 (homologous to yeast UBC4/5) [Homo sapiens]	---	-1.20831
1386963_at	thyroid hormone receptor interactor 10	Trip10	-1.20872
1374152_at	Unknown function	Bing4	-1.20893
1377096_at	similar to RIKEN cDNA 2310020P08 (predicted)	RGD1309462_predicted	-1.20907
1368862_at	v-akt murine thymoma viral oncogene homolog 1	Akt1	-1.20914
1388564_at	similar to hypothetical protein FLJ20436	RGD:1303127	-1.20954
1373876_at	Similar to eukaryotic translation initiation factor 4E like 3; DNA segment, human D0S6743E (LOC363275), mRNA	---	-1.20962
1388721_at	heat shock 22kDa protein 8	Hspb8	-1.21006
1371352_at	High mobility group protein 17	Hmgn2	-1.2102
1388369_at	similar to gp25L2 protein (predicted)	RGD1307627_predicted	-1.21092
1373721_at	similar to histidyl-tRNA synthetase-like (predicted) /// similar to Histidyl-tRNA synthetase-like	RGD1308426_predicted /// LOC498842	-1.21092
1388871_at	ash2 (absent, small, or homeotic)-like (Drosophila) (predicted)	Ash2l_predicted	-1.21113
1373107_at	asparagine-linked glycosylation 1 homolog (yeast, beta-1,4-mannosyltransferase) (predicted)	Alg1_predicted	-1.21122
1374508_at	nephronophthisis 1 (juvenile) (predicted)	Nphp1_predicted	-1.21156
1391416_at	similar to ankyrin repeat domain protein 17 isoform b	LOC289521	-1.21157
1387000_at	hypothetical gene supported by NM_019385	LOC497835	-1.2116
1399142_at	GLE1 RNA export mediator-like (yeast (predicted)	---	-1.21169
1375849_at	Transcribed locus	---	-1.21185
1382065_at	Transcribed locus	---	-1.21195
1368917_at	nudix (nucleoside diphosphate linked moiety X)-type motif 1	Nudt1	-1.21249
1394075_at	Fanconi anemia, complementation group A (predicted)	Fanca_predicted	-1.2131
1371620_at	similar to px19-like protein (predicted)	RGD1308082_predicted	-1.21361
1390527_at	LOC500795	LOC500795	-1.21397
1372644_at	similar to RIKEN cDNA 1110038F14 (predicted)	RGD1304721_predicted	-1.21417
1367513_at	Transmembrane 9 superfamily protein member 4 (predicted)	---	-1.21444
1398759_at	transforming growth factor beta 1 induced transcript 4	Tgfb1i4	-1.21444
1375144_at	Similar to testis specific protein, Ddc8	Timp2	-1.21451
1388581_at	hematological and neurological expressed sequence 1	Hn1	-1.21457
1371980_at	ATPase family, AAA domain containing 3A (predicted)	Atad3a_predicted	-1.21459
1374581_at	similar to RIKEN cDNA 1110021N07 (predicted) /// similar to Der1-like domain family, member 1	RGD1311835_predicted /// LOC500872	-1.21462
1374877_at	Transcribed locus, strongly similar to NP_079892.1 translocase of inner mitochondrial membrane 50 homolog [Mus musculus]	---	-1.21464
1372464_at	similar to coat protein gamma-cop	LOC297428	-1.21485
1376576_at	Dual specificity phosphatase 11 (RNA/RNP complex 1-interacting) (predicted)	---	-1.21495
1373387_at	Similar to hypothetical protein DC50 (LOC299212), mRNA	---	-1.21515
1374455_at	similar to AYP1 (predicted)	RGD1310634_predicted	-1.21531
1387368_at	muscle and microspikes RAS	Mras	-1.21562
1371704_at	DEAD (Asp-Glu-Ala-Asp) box polypeptide 23 (predicted)	Ddx23_predicted	-1.2157
1390485_at	ring finger protein 153 (predicted)	Rnf153_predicted	-1.21615
1370080_at	heme oxygenase (decycling) 1	Hmox1	-1.21628
1398387_at	Unknown (protein for MGC:72614)	RGD:735075	-1.2164
1374642_at	zinc finger protein 64 (predicted)	Zfp64_predicted	-1.21673
1392837_at	P34 protein	P34	-1.21679
1398377_at	similar to 4930488P06Rik protein	MGC93893	-1.21684
1398878_at	similar to CPSF4 protein	MGC108785	-1.21705
1386951_at	NADH dehydrogenase (ubiquinone) 1 alpha subcomplex 5	Ndufa5	-1.21718
1372510_at	Transcribed locus	---	-1.21723
1375041_at	Similar to F-box only protein 27	---	-1.21726
1388651_at	ring finger and CHY zinc finger domain containing 1	Rchy1	-1.21783
1371617_at	proteasome (prosome, macropain) 26S subunit, non-ATPase, 13 (predicted)	Psmd13_predicted	-1.21789
1372697_at	mitochondrial ribosomal protein S15	Mrps15	-1.21815
1377891_at	Similar to chromosome 20 open reading frame 169 (LOC296359), mRNA	---	-1.21828
1389964_at	NADH dehydrogenase (ubiquinone) 1, alpha/beta subcomplex, 1 (predicted)	Ndufab1_predicted	-1.21838
1395350_at	Tropomyosin 1, alpha	Tpm1	-1.21839
1390661_at	WD repeat domain 20 (predicted)	Wdr20_predicted	-1.21867
1367738_at	UNC-119 homolog (C. elegans)	Unc119	-1.21955
1391699_at	polymerase (RNA) II (DNA directed) polypeptide F	Polr2f	-1.21955
1376407_a_at	LSM7 homolog, U6 small nuclear RNA associated (S. cerevisiae) (predicted)	Lsm7_predicted	-1.21971
1370537_at	thyroid autoantigen	G22p1	-1.22003
1373412_at	5'-nucleotidase, cytosolic III (predicted)	Nt5c3_predicted	-1.22003
1374279_at	small inducible cytokine subfamily E, member 1	Scye1	-1.22007
1380875_at	Transcribed locus	---	-1.22037
1374729_at	Similar to UV radiation resistance associated	---	-1.22081
1372168_s_at	insulin-like growth factor binding protein 6	Igfbp6	-1.22082
1383477_at	ubiquitin carboxyl-terminal hydrolase L5 (predicted)	Uchl5_predicted	-1.22106
1383625_a_at	Similar to zinc finger protein (LOC300685), mRNA	---	-1.2211
1398928_at	divalent cation tolerant protein CUTA	RGD:1303306	-1.22114
1398867_at	neuronal differentiation-related gene	Prp19	-1.22121
1377234_at	Transcribed locus	---	-1.22149
1372173_at	Similar to U5 snRNP-specific protein (Prp8-binding) (LOC313056), mRNA	---	-1.22174
1397551_at	DEAD (Asp-Glu-Ala-Asp) box polypeptide 27 (predicted)	Ddx27_predicted	-1.22188
1397047_at	UI-R-DK0-cdf-f-09-0-UI.s1 UI-R-DK0 Rattus norvegicus cDNA clone UI-R-DK0-cdf-f-09-0-UI 3', mRNA sequence.	---	-1.22273
1389237_at	similar to Zc3hc1 protein	LOC296957	-1.22326
1383643_at	similar to UPF0197 protein C11orf10 homolog	LOC499317	-1.22328
1383252_at	seryl-tRNA synthetase 2 (predicted)	Sars2_predicted	-1.22393
1374660_at	similar to hypothetical protein FLJ20003 (predicted)	RGD1309025_predicted	-1.22407
1369473_at	phosphoglucomutase 1	Pgm1	-1.22417
1368108_at	ATPase, Ca++ transporting, cardiac muscle, fast twitch 1	Atp2a1	-1.22424
1373704_at	aquarius (predicted)	Aqr_predicted	-1.22432
1368232_at	mevalonate kinase	Mvk	-1.22474
1370067_at	malic enzyme 1	Me1	-1.22486
1372815_at	mago-nashi homolog, proliferation-associated (Drosophila) (predicted)	Magoh_predicted	-1.2249
1378976_x_at	Transcribed locus	---	-1.22516
1386569_at	Transcribed locus	---	-1.2254
1371846_at	phosphoglycerate dehydrogenase like 1 (predicted)	Phgdhl1_predicted	-1.22544
1374063_at	splicing factor, arginine/serine-rich 3 (SRp20) (predicted)	Sfrs3_predicted	-1.22551
1379980_at	Vesicle transport through interaction with t-SNAREs homolog 1A (yeast)	Vti1a	-1.22554
1386857_at	stathmin 1	Stmn1	-1.226
1384383_at	similar to Putative lysophosphatidic acid acyltransferase (predicted)	RGD1310520_predicted	-1.22623
1388397_at	EBNA1 binding protein 2 (predicted)	Ebna1bp2_predicted	-1.22647
1387361_s_at	phosphoglycerate kinase 1	Pgk1	-1.22713
1369412_a_at	solute carrier family 19, member 1	Slc19a1	-1.22765
1368650_at	TGFB inducible early growth response	Tieg	-1.22785
1373849_at	similar to BAF53a (predicted)	RGD1307747_predicted	-1.22802
1391415_at	putatative 28 kDa protein	RGD:727882	-1.22823
1376076_at	Transcribed sequence with moderate similarity to protein ref:NP_037464.1 (H.sapiens) hypoxia-inducible protein 2 [Homo sapiens]	---	-1.22832
1372057_at	Transcribed locus, strongly similar to XP_515359.1 PREDICTED: hypothetical protein XP_515359 [Pan troglodytes]	---	-1.22833
1383282_at	THAP domain containing 11 (predicted)	Thap11_predicted	-1.22836
1376115_at	Transcribed locus	---	-1.22858
1373205_at	U2 small nuclear RNA auxiliary factor 1-like 4 (predicted)	U2af1l4_predicted	-1.22861
1398988_at	hypothetical protein LOC307347	LOC307347	-1.22863
1388150_at	exportin 1, CRM1 homolog (yeast)	Xpo1	-1.22886
1370313_at	brain acyl-CoA hydrolase	Bach	-1.22889
1389497_at	Transcribed locus	---	-1.22935
1368368_a_at	liver-specific bHLH-Zip transcription factor 7	Lisch7	-1.22943
1380380_at	Transcribed locus	---	-1.22974
1374582_at	potassium channel tetramerisation domain containing 9 (predicted)	Kctd9_predicted	-1.23003
1394393_at	ubiquitin specific protease 7 (herpes virus-associated) (predicted)	Usp7_predicted	-1.23021
1374135_at	importin 4 (predicted)	Ipo4_predicted	-1.23022
1388510_at	similar to hypothetical protein FLJ11749	LOC287873	-1.23042
1372962_at	TAR (HIV) RNA binding protein 2 (predicted)	Tarbp2_predicted	-1.23054
1388803_at	deoxyhypusine synthase	RGD:1303326	-1.23085
1389664_at	similar to hypothetical protein (predicted)	RGD1305937_predicted	-1.23115
1370062_at	hypoxia induced gene 1	RGD:620215	-1.23116
1390483_at	solute carrier family 25 (mitochondrial carrier, palmitoylcarnitine transporter), member 29 (predicted)	Slc25a29_predicted	-1.2312
1392165_at	inhibitor of growth family, member 1-like (predicted)	Ing1l_predicted	-1.23204
1370869_at	branched chain aminotransferase 1, cytosolic	Bcat1	-1.23246
1389014_at	pre-B-cell colony enhancing factor 1	Pbef1	-1.2331
1371397_at	nitric oxide synthase interacting protein (predicted)	Nosip_predicted	-1.23318
1381764_s_at	Similar to RIKEN cDNA 2610010O19 (LOC314613), mRNA	---	-1.23368
1386872_at	insulin-like growth factor 2 receptor	Igf2r	-1.23369
1389885_at	Similar to RIKEN cDNA 0610025L06 (predicted)	---	-1.23447
1375439_at	WD repeat domain 18 (predicted)	Wdr18_predicted	-1.23482
1374716_at	similar to RIKEN cDNA 2810430M08 (predicted)	RGD1306106_predicted	-1.23494
1388519_at	Sec61 beta subunit (predicted)	Sec61b_predicted	-1.23508
1372575_at	WW domain binding protein 11 (predicted)	Wbp11_predicted	-1.23528
1373958_at	similar to ALEX3 protein	LOC367902	-1.23538
1374347_at	UI-R-BT1-bmz-e-12-0-UI.s1 UI-R-BT1 Rattus norvegicus cDNA clone UI-R-BT1-bmz-e-12-0-UI 3', mRNA sequence.	---	-1.23543
1387940_at	eukaryotic translation initiation factor 2B, subunit 5 epsilon	Eif2b5	-1.23606
1388318_at	phosphoglycerate kinase 1	Pgk1	-1.23607
1375520_at	Coatomer protein complex, subunit zeta 1 (predicted)	---	-1.23615
1390926_at	zinc finger, SWIM domain containing 3 (predicted)	Zswim3_predicted	-1.23618
1370910_at	replication factor C (activator 1) 2	Rfc2	-1.23618
1373447_at	similar to HN1-like protein (predicted)	RGD1305117_predicted	-1.23623
1372517_at	Similar to Peptidyl-prolyl cis-trans isomerase like 1 (PPIase) (Rotamase) (LOC309651), mRNA	---	-1.23749
1388394_at	alanyl-tRNA synthetase (predicted)	Aars_predicted	-1.23783
1388348_at	fatty acid elongase 1	---	-1.23802
1367695_at	quinoid dihydropteridine reductase	Qdpr	-1.23836
1372847_at	ACN9 homolog (S. cerevisiae) (predicted)	Acn9_predicted	-1.23907
1388960_at	pyrophosphatase	Pp	-1.23913
1372215_at	similar to mitochondrial ribosomal protein S11	LOC499185	-1.23943
1388770_at	similar to RIKEN cDNA 1810045K17 (predicted)	RGD1304890_predicted	-1.23996
1389146_at	hypothetical protein LOC498796	LOC498796	-1.24017
1374194_at	Transcribed sequences	---	-1.24025
1388403_at	similar to NADP+-specific isocitrate dehydrogenase	LOC361596	-1.24059
1399054_at	similar to deubiquitinating enzyme UBH1	LOC498138	-1.24087
1368436_at	nuclear distribution gene C homolog (Aspergillus)	Nudc	-1.24098
1398471_at	component of oligomeric golgi complex 6	RGD:1303283	-1.24142
1370323_at	thimet oligopeptidase 1	Thop1	-1.24175
1389055_at	peptidylprolyl isomerase E (cyclophilin E) (predicted)	Ppie_predicted	-1.24176
1373452_at	RNA terminal phosphate cyclase-like 1 (predicted)	Rcl1_predicted	-1.2418
1388908_at	similar to Peci protein	Peci	-1.24181
1389382_at	makorin, ring finger protein, 2 (predicted)	Mkrn2_predicted	-1.24199
1389103_at	Similar to RIKEN cDNA 2810037C03 (predicted)	---	-1.24206
1389279_at	RAN, member RAS oncogene family	Ran	-1.24211
1371693_at	Transcribed locus, strongly similar to NP_666148.1 AHA1, activator of heat shock 90kDa protein ATPase homolog 1; cDNA sequence BC023857 [Mus musculus]	---	-1.24222
1372550_at	Transcribed sequence with moderate similarity to protein pdb:1LBG (E. coli) B Chain B, Lactose Operon Repressor Bound To 21-Base Pair Symmetric Operator Dna, Alpha Carbons Only	---	-1.24235
1374704_at	Similar to KDEL (Lys-Asp-Glu-Leu) containing 2 protein	---	-1.24247
1398809_at	nuclear distribution gene E homolog 1 (A nidulans)	Nde1	-1.24262
1372411_at	Similar to lipin 3	---	-1.24274
1386912_at	procollagen C-proteinase enhancer protein	Pcolce	-1.24284
1393047_at	IBR domain containing 1 (predicted)	Ibrdc1_predicted	-1.24317
1370309_a_at	heterogeneous nuclear ribonucleoprotein A/B	Hnrpab	-1.24324
1368405_at	v-ral simian leukemia viral oncogene homolog A (ras related)	Rala	-1.24336
1372071_at	similar to 8D6 antigen (predicted)	RGD1305860_predicted	-1.24338
1379858_at	methyltransferase like 2 (predicted)	Mettl2_predicted	-1.24359
1371904_at	SET and MYND domain containing 2	Smyd2	-1.24359
1373334_at	Similar to RIKEN cDNA 0610039G24 gene (predicted)	---	-1.24368
1389587_at	Uridine monophosphate synthetase (predicted)	---	-1.24383
1382508_at	Ac1158	LOC302898	-1.24383
1386861_at	H2A histone family, member Z	H2afz	-1.24436
1371605_at	similar to RIKEN cDNA 2410011G03 (predicted)	RGD1311462_predicted	-1.24459
1383712_at	U87HG mRNA, complete sequence	---	-1.24462
1367502_at	mitochondrial ribosomal protein L21 (predicted)	Mrpl21_predicted	-1.24487
1382419_at	SoxLZ/Sox6 leucine zipper binding protein in testis (predicted)	Solt_predicted	-1.24493
1373637_at	Transcribed sequences	---	-1.24532
1372436_at	tumor protein D52-like 2	Tpd52l2	-1.24544
1392576_at	similar to C33A12.3-like	MGC109006	-1.24558
1383552_at	Transcribed locus	---	-1.24562
1367798_at	S-adenosylhomocysteine hydrolase	Ahcy	-1.24579
1388927_at	RAB, member of RAS oncogene family-like 4 (predicted)	Rabl4_predicted	-1.24593
1382039_at	RAB, member of RAS oncogene family-like 2A (predicted)	Rabl2a_predicted	-1.24613
1370803_at	ZW10 interactor	Zwint	-1.24624
1371483_at	nicotinamide nucleotide transhydrogenase	Nnt	-1.24636
1376730_at	Transcribed locus, strongly similar to NP_035200.2 prefoldin 2 [Mus musculus]	---	-1.24716
1389671_at	transient receptor potential cation channel, subfamily C, member 2	Trpc2	-1.24736
1367686_at	ribosome associated membrane protein 4	RAMP4	-1.24769
1391306_at	Transcribed locus	---	-1.24787
1372413_at	microspherule protein 1 (predicted)	Mcrs1_predicted	-1.24827
1392508_at	similar to RIKEN cDNA 3110010F15 (predicted)	RGD1308378_predicted	-1.24851
1387061_at	junction plakoglobin	Jup	-1.24852
1368382_at	S100 calcium binding protein A3	S100a3	-1.24862
1367526_at	mitochondrial ribosomal protein S26 (predicted)	Mrps26_predicted	-1.24926
1386898_at	heat shock 10 kDa protein 1	Hspe1	-1.24929
1388323_at	NADH dehydrogenase (ubiquinone) 1 alpha subcomplex, 9 (predicted)	Ndufa9_predicted	-1.24941
1376963_at	dual-specificity tyrosine-(Y)-phosphorylation regulated kinase 2 (predicted)	Dyrk2_predicted	-1.24961
1370842_at	branched chain keto acid dehydrogenase kinase	Bckdk	-1.24986
1376580_at	similar to frataxin	LOC499335	-1.24999
1389215_at	selenophosphate synthetase 1 (predicted)	Sephs1_predicted	-1.25011
1399131_at	Transcribed locus, strongly similar to NP_079761.1 ribosomal protein, mitochondrial, S22 [Mus musculus]	---	-1.25014
1372551_at	Fas-activated serine/threonine kinase (predicted)	---	-1.25027
1377137_at	tyrosyl-DNA phosphodiesterase 1 (predicted)	Tdp1_predicted	-1.25048
1375612_at	Heterogeneous nuclear ribonucleoprotein A1	Hnrpa1	-1.25057
1371380_at	pyruvate dehydrogenase E1 alpha 1	Pdha1	-1.25059
1372043_at	similar to ribosomal protein P0-like protein; 60S acidic ribosomal protein PO; ribosomal protein, large, P0-like (predicted)	RGD1311709_predicted	-1.25067
1395313_s_at	Annexin III (Lipocortin III)	---	-1.25085
1398877_at	stress-induced-phosphoprotein 1	Stip1	-1.25096
1369433_at	IP63 protein	RGD:620464	-1.25103
1386983_at	hydroxymethylbilane synthase	Hmbs	-1.25112
1370325_at	Golgi reassembly stacking protein 2	MGC93180	-1.25156
1372472_at	Transcribed locus, strongly similar to NP_694698.2 microtubule-associated protein, RP/EB family, member 2; T-cell activation protein, EB1 family, member 2; APC-binding protein EB1 [Mus musculus]	---	-1.25197
1383088_at	similar to RIKEN cDNA 2610209A20 (predicted)	RGD1305211_predicted	-1.25203
1388715_at	glycyl-tRNA synthetase (predicted)	Gars_predicted	-1.25234
1377070_at	splicing factor 3b, subunit 2 (predicted)	Sf3b2_predicted	-1.25249
1372944_at	Transcribed sequence with strong similarity to protein pir:A55014 (H.sapiens) A55014 GTP-binding protein DRG homolog - human	---	-1.25259
1372866_at	Similar to hypothetical protein MGC18873 (predicted)	---	-1.2527
1370829_at	farnesyltransferase, CAAX box, beta	Fntb	-1.25299
1374720_at	Transcribed locus	---	-1.25308
1367465_at	defender against cell death 1	Dad1	-1.25356
1388443_at	CDK2 (cyclin-dependent kinase 2)-associated protein 1 (predicted)	Cdk2ap1_predicted	-1.25369
1370001_at	RAB8A, member RAS oncogene family	Rab8a	-1.25379
1397584_at	Transcribed locus	---	-1.25389
1388538_at	Transcribed locus, weakly similar to XP_216991.2 PREDICTED: similar to RBX1 protein [Rattus norvegicus]	---	-1.25404
1378824_at	Transcribed locus	---	-1.25469
1369961_at	phosphatidic acid phosphatase 2a	Ppap2a	-1.25493
1377687_at	Transcribed locus	---	-1.25549
1375429_at	Similar to hypothetical protein	---	-1.25581
1388588_at	mammary tumor virus receptor 2 (predicted)	Mtvr2_predicted	-1.25608
1369965_at	mutL homolog 1 (E. coli) /// hypothetical gene supported by NM_031053	Mlh1 /// LOC497834	-1.25616
1367529_at	similar to RIKEN cDNA 1110021N07 (predicted) /// similar to Der1-like domain family, member 1	RGD1311835_predicted /// LOC500872	-1.25644
1389057_at	similar to ARV1 homolog (predicted)	RGD1310264_predicted	-1.25676
1391768_at	proteasome (prosome, macropain) 26S subunit, ATPase, 4	Psmc4	-1.2568
1372797_at	similar to Polyglutamine binding protein 1	LOC302557	-1.25684
1398660_at	Solute carrier family 35, member F2 (predicted)	---	-1.2571
1387962_at	zinc finger protein 180	Zfp180	-1.25721
1374390_at	Similar to RIKEN cDNA 1810009A15 (LOC293720), mRNA	---	-1.25728
1373454_at	similar to RIKEN cDNA 0610037P05 (predicted)	RGD1305823_predicted	-1.25826
1374938_at	ZW10 homolog, centromere/kinetochore protein (Drosophila) (predicted)	Zw10_predicted	-1.25875
1374689_at	phosphatidylinositol 4-kinase, catalytic, beta polypeptide	Pik4cb	-1.25875
1373989_at	Ras association domain family 1	Rassf1	-1.2589
1389639_at	similar to Shb protein	LOC362513	-1.25918
1376513_a_at	Transcribed sequence with moderate similarity to protein sp:P00722 (E. coli) BGAL_ECOLI Beta-galactosidase	---	-1.25952
1375972_at	Similar to membrane protein expressed in epithelial-like lung adenocarcinoma (predicted)	---	-1.25961
1389175_at	Wolf-Hirschhorn syndrome candidate 2 (predicted)	Whsc2_predicted	-1.25965
1376098_a_at	myosin IG (predicted)	Myo1g_predicted	-1.25995
1367454_at	coatomer protein complex, subunit beta 2 (beta prime)	Copb2	-1.26011
1389402_at	Transcribed locus	---	-1.26032
1368567_at	MIPP65 protein	RGD:621020	-1.2604
1397456_at	similar to hypothetical protein	LOC291940	-1.26056
1399133_at	F-box only protein 7 (predicted)	Fbxo7_predicted	-1.26104
1369996_at	polymerase (RNA) II (DNA directed) polypeptide F	Polr2f	-1.26106
1376930_at	Similar to mitochondrial ribosomal protein L51; mitochondrial ribosomal protein 64 (LOC297601), mRNA	---	-1.26118
1374886_at	BCS1-like	Bcs1l	-1.26142
1377042_at	Transcribed sequence with weak similarity to protein ref:NP_116062.1 (H.sapiens) hypothetical protein MGC10882 [Homo sapiens]	---	-1.26227
1376623_at	similar to hypothetical protein FLJ20898	MGC105601	-1.26287
1370073_at	protein kinase inhibitor p58	Dnajc3	-1.26316
1371073_at	UDP-Gal:betaGlcNAc beta 1,4- galactosyltransferase, polypeptide 1	B4galt1	-1.26346
1377147_at	Similar to RIKEN cDNA 2610009C09 (LOC361227), mRNA	---	-1.26429
1383831_at	similar to glutaminyl-tRNA synthase (glutamine-hydrolyzing)-like 1	LOC309911	-1.26432
1371772_at	similar to RIKEN cDNA 1810020C19 gene	LOC362169	-1.26434
1367637_a_at	protein phosphatase 1, catalytic subunit, gamma isoform /// protein serine-threonine phosphatase catalytic subunit PP-1b	Ppp1cc /// LOC360258	-1.26452
1389646_at	Similar to rabkinesin-6 (LOC361308), mRNA	---	-1.26453
1388948_at	START domain containing 10 (predicted)	Stard10_predicted	-1.26464
1379406_at	similar to chromosome 14 open reading frame 21 (predicted)	RGD1308396_predicted	-1.26477
1392064_at	distal-less homeobox 1 (predicted)	Dlx1_predicted	-1.26486
1388744_at	minichromosome maintenance protein 7	RGD:1303018	-1.26491
1367650_at	lipocalin 7	Lcn7	-1.26494
1373477_at	Similar to mitochondrial ribosomal protein L19	---	-1.26516
1382886_at	Transcribed locus, moderately similar to NP_009123.1 chromatin-specific transcription elongation factor large subunit [Homo sapiens]	---	-1.26524
1378475_at	amyloid beta precursor protein (cytoplasmic tail) binding protein 2 (predicted)	Appbp2_predicted	-1.2653
1372431_at	Ribosomal protein, mitochondrial, L12	---	-1.26581
1391427_at	similar to RIKEN cDNA 1500031M22 (predicted)	RGD1311752_predicted	-1.26582
1387821_at	RAB3A interacting protein	Rab3ip	-1.26595
1387915_at	Ratsg2	RGD:628897	-1.26667
1372061_at	similar to RIKEN cDNA 9530020D24 (predicted)	RGD1310612_predicted	-1.26678
1388955_at	Putative eps protein	MGEPS	-1.26752
1368002_at	mutS homolog 2 (E. coli)	Msh2	-1.26804
1374804_at	Similar to Autoantigen NGP-1 (predicted)	---	-1.26827
1381403_at	malic enzyme 2, NAD(+)-dependent, mitochondrial (predicted)	Me2_predicted	-1.26833
1373155_at	mitochondrial ribosomal protein L46 (predicted)	Mrpl46_predicted	-1.26846
1369938_at	pantothenate kinase 4	Pank4	-1.26848
1383129_at	Transcribed sequence with strong similarity to protein ref:NP_079187.1 (H.sapiens) hypothetical protein FLJ23091 [Homo sapiens]	---	-1.26873
1370663_at	wee 1 homolog (S. pombe) (predicted)	Wee1_predicted	-1.26908
1372059_at	similar to RIKEN cDNA 2610528E23 (predicted)	RGD1309437_predicted	-1.26954
1374443_at	immature colon carcinoma transcript 1 (predicted)	Ict1_predicted	-1.26966
1392963_at	secernin 1	Scrn1	-1.26972
1371385_at	Down syndrome critical region gene 2 (predicted)	Dscr2_predicted	-1.26977
1376737_at	Transcribed sequences	---	-1.27007
1370319_at	peptidylprolyl isomerase F (cyclophilin F)	Ppif	-1.27007
1374303_at	similar to prostate cancer antigen-1 (predicted)	RGD1306377_predicted	-1.27034
1373448_at	acylphosphatase 1, erythrocyte (common) type (predicted)	Acyp1_predicted	-1.27046
1398642_at	5-methyltetrahydrofolate-homocysteine methyltransferase reductase (predicted)	---	-1.27108
1372908_at	T-complex expressed gene 1 (predicted)	Tce1_predicted	-1.27132
1374857_at	similar to nucleolar protein family A, member 1	LOC499709	-1.27133
1373068_at	interferon-related developmental regulator 2 (predicted)	Ifrd2_predicted	-1.27134
1371838_at	similar to splicing factor, arginine/serine-rich 2	Sfrs2	-1.27165
1376435_at	Transcribed locus	---	-1.27185
1386971_at	protein phosphatase 1, regulatory subunit 10	Ppp1r10	-1.27246
1388436_at	small nuclear ribonucleoprotein polypeptide A (predicted)	Snrpa_predicted	-1.27288
1392938_s_at	similar to C11orf17 protein (predicted)	RGD1306959_predicted	-1.27293
1389530_at	Similar to hypothetical protein 6030458H05	---	-1.27298
1393983_at	exportin, tRNA (nuclear export receptor for tRNAs) (predicted)	Xpot_predicted	-1.2731
1372352_at	arginine-rich, mutated in early stage tumors (predicted)	Armet_predicted	-1.27311
1388477_at	similar to RAN-binding protein 3 (RanBP3)	LOC501281	-1.27333
1399084_at	DEAH (Asp-Glu-Ala-His) box polypeptide 16	RGD:1302963	-1.27344
1372950_at	blocked early in transport 1 homolog (S. cerevisiae) like	Bet1l	-1.27414
1388860_at	mitochondrial ribosomal protein L22 (predicted)	Mrpl22_predicted	-1.27419
1373389_at	acyl-Coenzyme A dehydrogenase family, member 9	Acad9	-1.27426
1367497_at	phosphatidylserine synthase 1 (predicted)	Ptdss1_predicted	-1.27437
1377338_at	RAD1 homolog (S. pombe) (predicted)	Rad1_predicted	-1.27439
1371962_at	Tu translation elongation factor, mitochondrial (predicted)	Tufm_predicted	-1.27461
1372408_at	Transcribed locus	---	-1.27469
1389389_at	DEAD (Asp-Glu-Ala-Asp) box polypeptide 56	RGD:1303195	-1.27472
1367464_at	siah binding protein 1; FBP interacting repressor; pyrimidine tract binding splicing factor; Ro ribonucleoprotein-binding protein 1	RGD:621674	-1.27478
1373451_at	similar to hypothetical protein FLJ11712	MGC94780	-1.27494
1388889_at	putative aminopeptidase Fxna	Fxna	-1.27521
1392928_at	similar to RIKEN cDNA 2810055F11 (predicted)	RGD1305721_predicted	-1.27531
1398958_at	nuclear prelamin A recognition factor-like (predicted)	Narfl_predicted	-1.27549
1388559_at	ubiquitin-conjugating enzyme E2M (UBC12 homolog, yeast) (predicted)	Ube2m_predicted	-1.27563
1368827_at	GATA binding protein 6	Gata6	-1.27621
1374721_at	Eukaryotic translation initiation factor 2, subunit 2 beta, 38kDa	Eif2s2	-1.27629
1388405_at	similar to colonic and hepatic tumor over-expressed protein isoform a	LOC311191	-1.27654
1367921_at	integrin-linked kinase-associated serine/threonine phosphatase 2C	Ilkap	-1.27655
1367931_a_at	polypyrimidine tract binding protein 1	Ptbp1	-1.27683
1376016_at	similar to RIKEN cDNA 1110007L15 (predicted)	RGD1311660_predicted	-1.27708
1376476_at	similar to 1200003M09Rik protein (predicted)	RGD1305553_predicted	-1.27733
1367628_at	lectin, galactose binding, soluble 1	Lgals1	-1.27736
1384151_at	Transcribed locus	---	-1.27772
1390383_at	adipose differentiation-related protein	ADRP	-1.27798
1372653_at	FK506 binding protein 11 (predicted)	Fkbp11_predicted	-1.27805
1371850_at	3'-phosphoadenosine 5'-phosphosulfate synthase 1 (predicted)	Papss1_predicted	-1.27808
1379862_at	Transcribed sequence with weak similarity to protein ref:NP_491034.1 (C.elegans) Y71F9B.2.p [Caenorhabditis elegans]	---	-1.27816
1383324_at	Similar to PALS2-alpha splice variant	---	-1.27819
1371743_at	guanylate kinase 1 (predicted)	Guk1_predicted	-1.27842
1371918_at	Transcribed locus, weakly similar to NP_002405.1 CD99 antigen; MIC2 (monoclonal antibody 12E7); Antigen identified by monoclonal 12E7, Y homolog; antigen identified by monoclonal antibodies 12E7, F21 and O13 [Homo sapiens]	---	-1.27874
1374554_at	similar to HT014 (predicted)	RGD1308048_predicted	-1.27874
1373463_at	Collagen, type V, alpha 2	Col5a2	-1.27923
1397508_at	similar to RIKEN cDNA 2310005B10	MGC95311	-1.27932
1388779_at	zinc finger protein 180	Zfp180	-1.27952
1375659_at	Sec61, alpha subunit 2 (S. cerevisiae) (predicted)	Sec61a2_predicted	-1.27955
1371347_at	similar to RIKEN cDNA B230114J08 (predicted)	RGD1307561_predicted	-1.28024
1393251_at	Transcribed locus	---	-1.28052
1376519_at	brain protein 16	Brp16	-1.28056
1395118_at	similar to RNA (guanine-9-) methyltransferase domain containing 2	LOC295496	-1.28076
1382423_at	Transcribed locus	---	-1.28128
1389538_at	nuclear factor of kappa light chain gene enhancer in B-cells inhibitor, alpha	Nfkbia	-1.28129
1379778_at	similar to HSPC043 protein (predicted)	RGD1307983_predicted	-1.28139
1377745_at	similar to hypothetical protein FLJ20331	LOC310946	-1.2816
1379312_at	peroxisome proliferative activated receptor, gamma, coactivator-related 1 (predicted)	Pprc1_predicted	-1.28195
1367671_at	proliferating cell nuclear antigen	Pcna	-1.28206
1383627_a_at	general transcription factor IIF, polypeptide 1, 74kDa	Gtf2f1	-1.2826
1372798_at	Laminin gamma 3 (predicted)	---	-1.28262
1370283_at	heat shock 70kD protein 5	Hspa5	-1.2828
1387925_at	asparagine synthetase	Asns	-1.28319
1373468_at	Cyclin F	Ccnf	-1.28319
1383430_at	similar to hypothetical protein MGC2776 (predicted)	RGD1309946_predicted	-1.28354
1376878_at	similar to RIKEN cDNA 2310022B05	LOC498967	-1.28399
1371683_at	LSM4 homolog, U6 small nuclear RNA associated (S. cerevisiae) (predicted)	Lsm4_predicted	-1.2842
1371035_at	general transcription factor III A	Gtf3a	-1.28425
1372488_at	similar to RIKEN cDNA 2310057D15 (predicted)	RGD1309016_predicted	-1.2854
1379631_at	colony stimulating factor 1 (macrophage)	Csf1	-1.28551
1371713_at	Abelson murine leukemia viral (v-abl) oncogene homolog 1	Abl1	-1.28583
1390509_a_at	Similar to mitochondrial ribosomal protein L51; mitochondrial ribosomal protein 64 (LOC297601), mRNA	---	-1.28591
1385066_a_at	Similar to hypothetical protein FLJ13089 (predicted)	---	-1.28657
1373046_at	DAZ associated protein 1 (predicted)	---	-1.28721
1376985_at	similar to RIKEN cDNA 2310007F12	LOC317418	-1.28725
1388669_at	Splicing factor 3a, subunit 3 (predicted)	---	-1.28745
1367975_at	annexin A3	Anxa3	-1.28837
1383519_at	Hexokinase 2	Hk2	-1.28867
1371345_at	Transcribed sequence with weak similarity to protein ref:NP_003917.1 (H.sapiens) methyl-CpG binding domain protein 3 [Homo sapiens]	---	-1.28878
1372148_at	COMM domain containing 2 (predicted)	Commd2_predicted	-1.28905
1368171_at	lysyl oxidase	Lox	-1.28919
1388755_at	SEC23A (S. cerevisiae) (predicted)	Sec23a_predicted	-1.28939
1371802_at	coatomer protein complex, subunit epsilon (predicted)	Cope_predicted	-1.28942
1372037_at	enigma (LIM domain protein)	---	-1.28949
1372270_at	dolichyl-phosphate (UDP-N-acetylglucosamine) N-acetylglucosaminephosphotransferase 1 (GlcNAc-1-P transferase)	H2afx	-1.2904
1371530_at	keratin complex 2, basic, gene 8	Krt2-8	-1.29065
1374853_at	hypothetical LOC287173 (predicted)	RGD1305622_predicted	-1.29108
1390435_at	LOC361111 (predicted)	RGD1307583_predicted	-1.29117
1369971_a_at	heterogeneous nuclear ribonucleoprotein D	Hnrpd	-1.29135
1370224_at	signal transducer and activator of transcription 3	Stat3	-1.29156
1380216_at	similar to mKIAA0981 protein	LOC316457	-1.29168
1369935_at	cyclin D3	Ccnd3	-1.29173
1371498_at	similar to Jtv1-pending protein	LOC288480	-1.29195
1387865_at	deoxyuridine triphosphatase	Dutp	-1.29202
1373105_at	interleukin 1 receptor-like 1 ligand (predicted)	Il1rl1l_predicted	-1.29213
1399077_at	Similar to Metaxin 1, isoform 2	---	-1.29275
1371701_at	NADH dehydrogenase (ubiquinone) 1 beta subcomplex, 9 (predicted)	Ndufb9_predicted	-1.29275
1373959_at	Similar to alpha isoform of regulatory subunit A, protein phosphatase 2; serine/threonine protein phosphatase A subunit type 2A; protein phosphatase PP2A (LOC315648), mRNA	---	-1.29298
1384082_at	Similar to RIKEN cDNA 4922503N01 (predicted)	---	-1.29305
1392784_at	growth arrest specific 6	---	-1.29344
1371359_at	myeloid leukemia factor 2 (predicted)	Mlf2_predicted	-1.2937
1378080_at	similar to SCO cytochrome oxidase deficient homolog 1 (yeast)	LOC497930	-1.29396
1369962_at	5-aminoimidazole-4-carboxamide ribonucleotide formyltransferase/IMP cyclohydrolase	Atic	-1.29433
1384032_at	Transcribed locus	---	-1.29557
1389265_at	glucan (1,4-alpha-), branching enzyme 1 (predicted)	Gbe1_predicted	-1.29597
1372229_at	Similar to pyruvate dehydrogenase kinase, isoenzyme 3 (LOC296849), mRNA	---	-1.296
1390572_at	THO complex 3 (predicted)	Thoc3_predicted	-1.29629
1389033_at	similar to RIKEN cDNA 2900010M23 (predicted)	RGD1306917_predicted	-1.29647
1392810_at	apolipoprotein B editing complex 3 (predicted)	Apobec3_predicted	-1.29649
1375862_at	Similar to mKIAA0230 protein (LOC314016), mRNA	---	-1.29683
1375341_at	Kua homolog (predicted)	Kua_predicted	-1.29692
1367729_at	ornithine aminotransferase	Oat	-1.29715
1395534_at	Transcribed locus, strongly similar to XP_205779.4 PREDICTED: similar to RAS-like, family 10, member B; ras-like protein VTS58635 [Mus musculus]	---	-1.29935
1374291_at	similar to RIKEN cDNA 1700025B16 (predicted)	RGD1308015_predicted	-1.29962
1396062_at	Transcribed locus	---	-1.3
1393946_at	FUS interacting protein (serine-arginine rich) 1 (predicted)	---	-1.30062
1372916_at	mitochondrial ribosomal protein S27 (predicted)	Mrps27_predicted	-1.30077
1384011_a_at	similar to hypothetical protein MGC5297 (predicted)	RGD1309729_predicted	-1.3009
1392906_at	similar to Ubiquitin-like protein 4 (Ubiquitin-like protein GDX)	LOC293864	-1.30124
1372803_at	similar to DNA segment, Chr 14, ERATO Doi 449, expressed (predicted)	RGD1305689_predicted	-1.30168
1370045_at	polymerase (DNA directed), gamma	Polg	-1.30173
1371808_at	bleomycin hydrolase (predicted)	Blmh_predicted	-1.30231
1387377_a_at	p21 (CDKN1A)-activated kinase 1	Pak1	-1.30264
1384588_at	Transcribed locus	---	-1.30272
1371484_at	Similar to RIKEN cDNA 1810009A15 (LOC293720), mRNA	---	-1.30333
1372289_at	similar to solute carrier family 25 (mitochondrial carrier, Aralar), member 12	LOC311122	-1.30342
1384016_at	similar to R31449_3	LOC500790	-1.30398
1374569_at	glutamate-rich WD repeat containing 1 (predicted)	Grwd1_predicted	-1.30446
1374802_at	similar to chromosome 14 open reading frame 94 (predicted)	RGD1305288_predicted	-1.30489
1373518_at	Similar to RIKEN cDNA 1300007B12; clone MNCb-2755 (predicted)	---	-1.30491
1389487_at	similar to DnaJ (Hsp40) homolog, subfamily B, member 12 /// similar to DnaJ (Hsp40) homolog, subfamily B, member 12	LOC294513 /// LOC363376	-1.30501
1386586_at	similar to PAK/PLC-interacting protein 1	LOC361232	-1.30515
1383251_at	ADP-ribosyltransferase (NAD+, poly(ADP-ribose) polymerase)-like 2 (predicted)	Adprtl2_predicted	-1.30613
1388640_at	similar to Ubiquitin-like protein SMT3A precursor (Ubiquitin-related protein SUMO-2)	LOC499417	-1.30622
1380106_at	zinc finger protein 162	Zfp162	-1.30666
1386287_at	similar to RIKEN cDNA 5033405K12 (predicted)	RGD1311593_predicted	-1.30672
1371919_at	similar to RP2 protein, testosterone-regulated - ricefield mouse (Mus caroli)	RGD:1302935	-1.30691
1373535_at	enabled homolog (Drosophila) (predicted)	Enah_predicted	-1.30698
1385881_at	Transcribed locus	---	-1.30724
1383270_at	similar to hypothetical protein (predicted)	RGD1310571_predicted	-1.30737
1376317_at	origin recognition complex, subunit 6-like (S. cerevisiae) (predicted)	Orc6l_predicted	-1.3076
1388668_at	Similar to DNA segment, Chr 11, ERATO Doi 768, expressed (LOC363687), mRNA	---	-1.30765
1392970_at	similar to mucin 7, salivary (predicted)	RGD1311530_predicted	-1.3077
1377607_at	mitogen activated protein kinase kinase kinase 3 (predicted)	Map3k3_predicted	-1.30784
1384139_at	UI-R-E1-fi-f-03-0-UI.s1 UI-R-E1 Rattus norvegicus cDNA clone UI-R-E1-fi-f-03-0-UI 3' similar to gi|50600|emb|X63100|MMCX45 M.musculus mRNA for connexin45, mRNA sequence.	---	-1.30794
1368206_at	peroxisomal acyl-CoA thioesterase 1	Pte1	-1.30815
1389093_at	p21 (CDKN1A)-activated kinase 1	---	-1.30846
1373490_at	glia maturation factor, gamma	Gmfg	-1.30847
1371586_at	mitochondrial ribosomal protein L48 (predicted)	Mrpl48_predicted	-1.30932
1371658_at	neighbor of Cox4 (predicted)	Noc4_predicted	-1.31001
1398706_at	UI-R-DK0-cem-h-10-0-UI.s1 UI-R-DK0 Rattus norvegicus cDNA clone UI-R-DK0-cem-h-10-0-UI 3', mRNA sequence.	---	-1.31022
1370282_at	cysteine and glycine-rich protein 2	Csrp2	-1.31055
1376349_a_at	solute carrier family 29 (nucleoside transporters), member 2	Slc29a2	-1.31115
1383940_at	cell division cycle associated 1 (predicted)	Cdca1_predicted	-1.31119
1378638_a_at	similar to 2700029M09Rik protein (predicted)	RGD1311747_predicted	-1.31149
1369066_at	MAP-kinase activating death domain	Madd	-1.31232
1371810_at	Transcribed locus	---	-1.31239
1377079_a_at	protoporphyrinogen oxidase (predicted)	Ppox_predicted	-1.31257
1393621_at	vitamin K epoxide reductase complex, subunit 1-like 1	RGD:1303249	-1.31262
1376196_a_at	vitamin D receptor interacting protein (predicted)	Vdrip_predicted	-1.31292
1383227_at	Similar to RIKEN cDNA 4922503N01 (predicted)	---	-1.31297
1397653_at	Transcribed locus	---	-1.31318
1388574_at	tryptophanyl-tRNA synthetase (predicted)	Wars_predicted	-1.31339
1377760_at	similar to hypothetical protein MGC28606 (predicted)	RGD1310661_predicted	-1.31359
1374424_at	SKB1 homolog (S. pombe) (predicted)	Skb1_predicted	-1.31361
1391347_at	RAB8B, member RAS oncogene family	Rab8b	-1.31384
1390289_at	similar to RIKEN cDNA A530089I17 (predicted)	RGD1311375_predicted	-1.31413
1369039_at	phosphatidylinositol 4-kinase, catalytic, beta polypeptide	Pik4cb	-1.31475
1370506_at	demethyl-Q 7	Coq7	-1.31486
1385606_at	brain protein 16	Brp16	-1.31491
1396280_at	similar to G patch domain and KOW motifs	LOC302560	-1.31531
1370127_at	polymerase (DNA directed), delta 1, catalytic subunit	Pold1	-1.3154
1370847_at	spondin 2, extracellular matrix protein	Spon2	-1.31563
1374064_at	Similar to RIKEN cDNA 9530027K23 (predicted)	---	-1.3161
1398908_at	stomatin (Epb7.2)-like 2 (predicted)	Stoml2_predicted	-1.31614
1393784_at	vascular endothelial zinc finger 1 (predicted)	Vezf1_predicted	-1.31634
1372933_at	Transcribed locus	---	-1.31664
1371958_at	poly(A) binding protein, nuclear 1	Pabpn1	-1.31692
1394554_at	Transcribed locus	---	-1.31709
1388448_at	Similar to CDC42 small effector 2	---	-1.31729
1371822_at	polymerase (RNA) III (DNA directed) polypeptide D (predicted)	Polr3d_predicted	-1.31739
1383618_at	mitochondrial ribosomal protein L38 (predicted)	Mrpl38_predicted	-1.31743
1383213_at	epidermal growth factor receptor pathway substrate 8 (predicted) /// similar to Eps8	Eps8_predicted /// LOC365516	-1.31744
1377189_at	similar to BC282485_1 (predicted)	RGD1307390_predicted	-1.31748
1371665_at	SWI/SNF related, matrix associated, actin dependent regulator of chromatin, subfamily d, member 3 (predicted)	Smarcd3_predicted	-1.31759
1382093_at	Similar to DKFZP434B168 protein (predicted)	---	-1.318
1376512_at	FtsJ homolog 2 (E. coli) (predicted)	Ftsj2_predicted	-1.31918
1383581_at	Transcribed sequence with moderate similarity to protein pdb:1LBG (E. coli) B Chain B, Lactose Operon Repressor Bound To 21-Base Pair Symmetric Operator Dna, Alpha Carbons Only	---	-1.31943
1385471_at	DEAD (Asp-Glu-Ala-Asp) box polypeptide 27 (predicted)	Ddx27_predicted	-1.31985
1383871_at	Transcribed sequences	---	-1.32037
1370990_at	similar to cytokine receptor related protein 4	RGD:621517	-1.32042
1367586_at	lactate dehydrogenase A	Ldha	-1.32043
1371649_at	similar to mitochondrial ribosomal protein S24	LOC498406	-1.32141
1388634_at	phosphoglucomutase 1	Pgm1	-1.32162
1387800_at	Fas death domain-associated protein	Daxx	-1.32213
1388570_at	similar to RIKEN cDNA 2310005O14	LOC498909	-1.32255
1390859_at	similar to Nedd4 binding protein 1 (predicted)	RGD1305179_predicted	-1.32261
1386897_at	heterogeneous nuclear ribonucleoproteins methyltransferase-like 2 (S. cerevisiae)	Hrmt1l2	-1.32265
1372757_at	Signal transducer and activator of transcription 1	Stat1	-1.32311
1395520_at	RNA binding motif protein 28 (predicted)	Rbm28_predicted	-1.3232
1368055_a_at	lamin A	Lmna	-1.32326
1371342_at	cytochrome c-1 (predicted)	Cyc1_predicted	-1.32355
1390416_at	solute carrier family 25, member 30	Slc25a30	-1.324
1376866_at	Transcribed locus	---	-1.32433
1393842_at	similar to RIKEN cDNA 2700091N06 (predicted)	RGD1310710_predicted	-1.32436
1372832_at	Epimorphin	Epim	-1.32454
1388739_at	similar to chromosome 14 open reading frame 130	MGC94098	-1.32455
1374840_at	Transcribed locus, strongly similar to XP_484589.1 similar to peptidyl prolyl isomerase H; cyclophilin H; rotamase H [Mus musculus]	---	-1.32556
1389676_at	similar to hypothetical protein BC011981 (predicted)	RGD1310609_predicted	-1.32572
1375563_at	Similar to dendritic cell-derived ubiquitin-like protein (predicted)	---	-1.32599
1388107_at	protein phosphatase 2, regulatory subunit B, delta isoform	Ppp2r2d	-1.32624
1390805_at	Transcribed sequence with moderate similarity to protein pdb:1LBG (E. coli) B Chain B, Lactose Operon Repressor Bound To 21-Base Pair Symmetric Operator Dna, Alpha Carbons Only	---	-1.32632
1382684_at	Transcribed sequences	---	-1.32651
1381623_at	similar to Sfrs4 protein	LOC362612	-1.32727
1367833_at	peptidase (prosome, macropain) 26S subunit, ATPase 5	Psmc5	-1.32744
1371436_at	dimethylarginine dimethylaminohydrolase 2	RGD:1302955	-1.32814
1367982_at	aminolevulinic acid synthase 1	Alas1	-1.32847
1373371_a_at	similar to RIKEN cDNA 1110001J03	MGC112899	-1.3297
1388722_at	DnaJ (Hsp40) homolog, subfamily B, member 1 (predicted)	Dnajb1_predicted	-1.33011
1367730_at	vesicle docking protein	Vdp	-1.3304
1387917_at	lamina-associated polypeptide 1B	Lap1b	-1.33108
1388959_at	similar to KIAA0153 protein (predicted)	RGD1305319_predicted	-1.3311
1388877_at	mitochondrial ribosomal protein S5 (predicted)	Mrps5_predicted	-1.33119
1376722_at	nucleoporin 205kDa (predicted)	Nup205_predicted	-1.33122
1374931_at	mitochondrial ribosomal protein L40	Mrpl40	-1.33171
1375546_at	fizzy/cell division cycle 20 related 1 (Drosophila) (predicted)	Fzr1_predicted	-1.33174
1392471_at	Guanine nucleotide binding protein (G protein), gamma 12	Gng12	-1.33175
1372614_at	similar to mKIAA1797 protein (predicted)	RGD1311849_predicted	-1.33181
1381298_at	Minichromosome maintenance deficient 10 (S. cerevisiae) (predicted)	---	-1.33191
1389374_at	kinesin family member C3 (predicted)	Kifc3_predicted	-1.33234
1393233_at	Similar to hypothetical gene MGC19595 (predicted)	---	-1.3326
1379827_at	similar to G protein pathway suppressor 2	LOC497941	-1.33289
1375565_at	translocase of inner mitochondrial membrane 22 homolog (yeast)	Timm22	-1.33306
1371368_at	SEC61, alpha subunit (S. cerevisiae)	Sec61a1	-1.33317
1389973_a_at	Similar to Surf-4 protein - mouse (LOC296598), mRNA	---	-1.33405
1373557_at	mini chromosome maintenance deficient 4 homolog (S. cerevisiae)	---	-1.33452
1387062_a_at	checkpoint kinase 1 homolog (S. pombe)	Chek1	-1.33463
1388616_at	similar to RIKEN cDNA 2310042G06	MGC72955	-1.33478
1374632_at	phosphatidylserine receptor (predicted)	Ptdsr_predicted	-1.33491
1383455_at	glutamyl-prolyl-tRNA synthetase (predicted)	Eprs_predicted	-1.33514
1375865_at	tight junction protein 4 (peripheral) (predicted)	Tjp4_predicted	-1.33539
1389208_at	similar to AI448196 protein	LOC363495	-1.33583
1385905_at	Transcribed locus	---	-1.3361
1389184_at	Similar to RNaseP protein p30 (LOC309518), mRNA	---	-1.33619
1393753_at	similar to chronic myelogenous leukemia tumor antigen 66 (predicted)	RGD1310624_predicted	-1.33653
1372608_at	Similar to P100 polymyositis-scleroderma overlap syndrome associated autoantigen homolog (LOC313707), mRNA	---	-1.33693
1371535_at	phosphomannomutase 2 (predicted)	Pmm2_predicted	-1.337
1373935_at	polymerase (DNA directed), delta 2, regulatory subunit (predicted)	Pold2_predicted	-1.33719
1385458_a_at	similar to C11orf17 protein (predicted)	RGD1306959_predicted	-1.33721
1372611_at	similar to RIKEN cDNA 2010305A19 (predicted)	RGD1305274_predicted	-1.33756
1398247_at	protease, serine, 15	Prss15	-1.33792
1379257_at	erythrocyte protein band 4.1-like 4a (predicted)	Epb4.1l4a_predicted	-1.33862
1374945_at	similar to RIKEN cDNA 6720458F09 gene	MGC94251	-1.33944
1387151_at	nucleoporin 107	Nup107	-1.33999
1387871_at	cofilin 1	Cfl1	-1.34045
1387048_at	nuclear RNA helicase, DECD variant of DEAD box family	Ddx39	-1.34061
1387233_at	hydroxysteroid (17-beta) dehydrogenase 7	Hsd17b7	-1.34082
1389681_at	Transcribed locus	---	-1.34143
1382233_a_at	UI-R-C0-ji-d-12-0-UI.s1 UI-R-C0 Rattus norvegicus cDNA clone UI-R-C0-ji-d-12-0-UI 3', mRNA sequence.	---	-1.34221
1398765_at	adaptor-related protein complex 2, mu 1 subunit	Ap2m1	-1.34269
1383479_at	Myelin basic protein	Mbp	-1.34271
1388846_at	Similar to RIKEN cDNA 5430429M05 (LOC361567), mRNA	---	-1.34271
1392535_at	pyrroline-5-carboxylate reductase-like (predicted)	Pycrl_predicted	-1.34316
1370939_at	acyl-CoA synthetase long-chain family member 1	Acsl1	-1.34332
1384280_at	Similar to Opa-interacting protein 5	---	-1.34334
1391086_at	katanin p60 subunit A 1	RGD:1303062	-1.34367
1370364_at	ADP-ribosylation factor GTPase activating protein 1	Arfgap1	-1.3444
1391026_at	Similar to immediate early response 5-like	---	-1.34459
1367674_at	phosphatidylinositol transfer protein, beta	Pitpnb	-1.34463
1372128_at	mitochondrial ribosomal protein S12 (predicted)	Mrps12_predicted	-1.34534
1388528_at	Fibrillarin (predicted)	---	-1.34584
1371976_at	similar to RIKEN cDNA 9530058B02	LOC497875	-1.34597
1372450_at	Transcribed sequence with moderate similarity to protein ref:NP_064573.1 (H.sapiens) DC13 protein [Homo sapiens]	---	-1.34644
1372181_at	Transcribed sequence with moderate similarity to protein sp:P00722 (E. coli) BGAL_ECOLI Beta-galactosidase	---	-1.34668
1386895_at	melanoma antigen, family D, 1	Maged1	-1.34673
1383460_at	similar to uroplakin IIIb (predicted)	RGD1309615_predicted	-1.34682
1379047_at	PDGFA associated protein 1	Pdap1	-1.34735
1373279_at	Similar to beta-catenin-interacting protein ICAT	---	-1.34796
1386129_at	inhibitor of growth family, member 1-like (predicted)	Ing1l_predicted	-1.34806
1367648_at	insulin-like growth factor binding protein 2	Igfbp2	-1.34834
1383181_at	DnaJ (Hsp40) homolog, subfamily C, member 9 (predicted)	Dnajc9_predicted	-1.34881
1382727_at	Transcribed sequence with moderate similarity to protein sp:P00722 (E. coli) BGAL_ECOLI Beta-galactosidase	---	-1.34981
1376029_at	RAB2, member RAS oncogene family-like	RGD:1302985	-1.35007
1376136_at	Similar to 3230401M21Rik protein (LOC287157), mRNA	---	-1.35015
1371813_at	HIRA interacting protein 3 (predicted)	---	-1.35058
1368835_at	signal transducer and activator of transcription 1	Stat1	-1.35073
1389248_at	galactokinase 1 (predicted)	Galk1_predicted	-1.35095
1378282_at	casein kinase II, alpha 2, polypeptide (predicted)	Csnk2a2_predicted	-1.35151
1371935_at	transmembrane protein 9 (predicted)	Tmem9_predicted	-1.35161
1376252_at	splicing factor, arginine/serine-rich 3 (SRp20) (predicted)	Sfrs3_predicted	-1.35192
1374841_at	similar to RIKEN cDNA 2410004B18	LOC499724	-1.35199
1373161_at	similar to RIKEN cDNA 6530411B15	MGC93733	-1.35217
1389622_at	similar to citrin	LOC362322	-1.35261
1374018_at	similar to ASC-1 complex subunit P100	LOC498402	-1.35286
1373074_at	similar to RIKEN cDNA 2700002I20 (predicted)	RGD1307279_predicted	-1.35353
1371461_at	similar to RIKEN cDNA 2410166I05 (predicted)	RGD1305453_predicted	-1.35399
1376265_at	Similar to six transmembrane epithelial antigen of prostate 2; six transmembrane prostate protein; prostate cancer associated gene 1; prostate cancer associated protein 1 (LOC312052), mRNA	---	-1.35428
1376346_at	Tnf receptor associated factor 4 (predicted)	---	-1.35432
1384407_at	similar to RIKEN cDNA 1110025F24 (predicted)	RGD1311451_predicted	-1.35471
1397409_s_at	wee 1 homolog (S. pombe) (predicted)	Wee1_predicted	-1.35587
1390543_at	Transcribed locus	---	-1.35605
1383175_a_at	similar to C11orf17 protein (predicted)	RGD1306959_predicted	-1.35624
1392957_at	similar to Single-stranded DNA-binding protein 2 (Sequence-specific single-stranded-DNA-binding protein 2)	LOC361877	-1.35653
1372661_at	transducin (beta)-like 3 (predicted)	Tbl3_predicted	-1.35667
1389261_at	Similar to hypothetical protein MGC23280 (LOC303275), mRNA	---	-1.35688
1373439_at	Lamin B receptor	Lbr	-1.3572
1369931_at	similar to pyruvate kinase (EC 2.7.1.40) isozyme M2 - rat	LOC498661	-1.35766
1368588_at	ATP-dependent, RNA helicase	Ddx52	-1.35781
1371712_at	similar to snRNP core protein SMX5d	LOC292030	-1.35801
1388353_at	proliferation-associated 2G4, 38kDa	RGD:1302994	-1.3581
1397161_a_at	intersectin 1	Itsn	-1.35862
1393647_at	histone aminotransferase 1 (predicted)	Hat1_predicted	-1.35898
1385765_at	similar to lin-9 homolog (C. elegans)	LOC360888	-1.35931
1374036_at	minichromosome maintenance deficient 2 mitotin (S. cerevisiae) (predicted)	Mcm2_predicted	-1.35989
1379424_at	Similar to DKFZP434B168 protein (predicted)	---	-1.35996
1371451_at	ribonuclease H2, large subunit (predicted)	Rnaseh2a_predicted	-1.36008
1380009_at	vaccinia related kinase 1 (predicted)	Vrk1_predicted	-1.3601
1371885_at	cytoskeleton-associated protein 1 (predicted)	Ckap1_predicted	-1.36011
1372609_at	Transcribed locus	---	-1.36018
1388341_at	RAN GTPase activating protein 1 (predicted)	Rangap1_predicted	-1.36042
1376567_at	FtsJ homolog 2 (E. coli) (predicted)	---	-1.36052
1386981_at	solute carrier family 16 (monocarboxylic acid transporters), member 1	Slc16a1	-1.3609
1384550_at	similar to RIKEN cDNA 1810030O07	LOC317344	-1.36092
1384340_a_at	similar to N-acetyltransferase ARD1	LOC363518	-1.36116
1368260_at	aurora kinase B	Aurkb	-1.36134
1390623_at	Transcribed sequence with weak similarity to protein prf:2113200B (H.sapiens) 2113200B ribosomal protein L21 [Homo sapiens]	---	-1.36134
1382275_at	similar to PAK/PLC-interacting protein 1	LOC361232	-1.36172
1398424_at	WD SOCS-box protein 2	Wsb2	-1.36221
1383922_a_at	similar to N-acetyltransferase ARD1	LOC363518	-1.36225
1373853_at	similar to hypothetical protein MGC15716 (predicted)	RGD1308123_predicted	-1.36228
1382635_at	SCY1-like 1 (S. cerevisiae) (predicted)	Scyl1_predicted	-1.36238
1388099_a_at	TCF3 (E2A) fusion partner	Tfpt	-1.36273
1372607_at	nucleotide binding protein 2 (predicted)	Nubp2_predicted	-1.36292
1374534_at	MIRO2 protein	Rhot2	-1.36292
1387086_at	calcium modulating ligand	Camlg	-1.36315
1372305_at	coatomer protein complex, subunit zeta 2 (predicted)	Copz2_predicted	-1.36354
1374897_at	Similar to ALY (LOC287878), mRNA	---	-1.36364
1388140_at	RAB13, member RAS oncogene family	Rab13	-1.36389
1371896_at	growth arrest and DNA-damage-inducible, gamma interacting protein 1 (predicted)	Gadd45gip1_predicted	-1.3644
1374388_at	EF hand domain containing 2 (predicted)	Efhd2_predicted	-1.36517
1390962_at	Transcribed locus	---	-1.36521
1381079_at	Transcribed locus	---	-1.36524
1374671_at	similar to expressed sequence AI429613	LOC361857	-1.36533
1370235_at	diazepam binding inhibitor	Dbi	-1.36549
1388521_at	pyrroline-5-carboxylate synthetase (glutamate gamma-semialdehyde synthetase) (predicted)	Pycs_predicted	-1.36558
1367790_at	staphylococcal nuclease domain containing 1	Snd1	-1.36603
1391062_at	similar to elongation protein 4 homolog	LOC499851	-1.36604
1373168_at	Similar to LEYDIG CELL TUMOR 10 KD PROTEIN	LOC288913	-1.3662
1383601_at	BCL2-associated transcription factor 1 (predicted)	---	-1.3662
1367599_at	ATP synthase, H+ transporting, mitochondrial F0 complex, subunit c (subunit 9), isoform 1	Atp5g1	-1.36621
1375280_at	CGI-146 protein	PNAS-4	-1.3676
1376001_at	similar to RNA polymerase I associated factor (PAF53)	LOC313245	-1.36768
1373530_at	cyclin E	Ccne1	-1.36787
1374836_at	RNA, U3 small nucleolar interacting protein 2 (predicted)	Rnu3ip2_predicted	-1.36818
1382062_at	similar to hypothetical protein FLJ13273 (predicted)	RGD1311822_predicted	-1.36818
1368114_at	fibroblast growth factor 13	Fgf13	-1.36835
1384988_at	F-box only protein 5 (predicted)	Fbxo5_predicted	-1.3686
1370931_at	X-ray repair complementing defective repair in Chinese hamster cells 5	Xrcc5	-1.36936
1389393_at	similar to RIKEN cDNA 2210412D01 (predicted)	RGD1308210_predicted	-1.36944
1373870_at	similar to RIKEN cDNA 2810405J04 (predicted)	RGD1305486_predicted	-1.36951
1390966_at	CDNA clone IMAGE:7305115	---	-1.37002
1374212_at	Transcribed locus	---	-1.37152
1397556_at	Mak3 homolog (S. cerevisiae) (predicted)	Mak3_predicted	-1.37158
1372660_at	tubulin, gamma complex associated protein 3 (predicted)	Tubgcp3_predicted	-1.37183
1381759_at	hypothetical LOC291903	LOC291903	-1.37202
1374034_at	cysteinyl-tRNA synthetase (predicted)	Cars_predicted	-1.37203
1390585_at	mannan-binding lectin serine peptidase 1	Masp1	-1.37238
1383742_at	sorting nexin 7 (predicted)	Snx7_predicted	-1.37257
1372642_at	Transcribed locus	---	-1.37257
1373613_at	Histone deacetylase 7	Hdac7a	-1.37284
1384050_at	budding uninhibited by benzimidazoles 3 homolog (S. cerevisiae) (predicted)	Bub3_predicted	-1.37311
1378902_at	similar to hypothetical protein FLJ10900 (predicted)	RGD1310420_predicted	-1.37349
1371765_at	Similar to Histone H2A.1 (LOC303177), mRNA	---	-1.3735
1376762_at	Similar to Pleckstrin homology domain-containing protein family A member 1 (Tandem PH domain containing protein-1) (TAPP-1)	---	-1.37423
1373090_at	Signal sequence receptor, alpha (predicted)	Ssr1	-1.37465
1374289_at	RNA polymerase 1-1 (predicted)	Rpo1-1_predicted	-1.37536
1388366_at	mitochondrial ribosomal protein L4 (predicted)	Mrpl4_predicted	-1.37605
1377114_at	EST239154 Normalized rat heart, Bento Soares Rattus sp. cDNA clone RHECZ07 3' end, mRNA sequence.	---	-1.37637
1376288_at	Transcribed locus	---	-1.37665
1383741_at	Transcribed locus	---	-1.37706
1372574_at	TEA domain family member 2	Tead2	-1.37724
1389668_at	similar to AD024 protein (predicted)	RGD1307811_predicted	-1.37735
1379358_at	Transcribed locus	---	-1.37818
1390466_at	Transcribed locus	---	-1.38043
1395928_at	Nuclear receptor subfamily 1, group D, member 1	Nr1d1	-1.38054
1372730_at	Transcribed locus	---	-1.38058
1378568_a_at	Transcribed sequences	---	-1.38078
1387366_at	interleukin enhancer binding factor 3	Ilf3	-1.38103
1392544_at	rcd1 (required for cell differentiation) homolog 1 (S. pombe) (predicted)	Rqcd1_predicted	-1.38117
1367849_at	syndecan 1	Sdc1	-1.38131
1382163_at	GATA binding protein 3	Gata3	-1.38133
1367603_at	Similar to Tpi1 protein	---	-1.38134
1373290_at	similar to Ezh2 protein	LOC312299	-1.38237
1390208_at	HIV-1 Tat interactive protein 2 (predicted)	Htatip2_predicted	-1.38368
1367754_s_at	argininosuccinate lyase /// heterogeneous nuclear ribonucleoprotein A/B	Asl /// Hnrpab	-1.38374
1371442_at	hypoxia up-regulated 1	Hyou1	-1.38426
1367516_at	Clone E5-B dystrobrevin binding protein 1 variant	---	-1.38508
1374409_at	TAF6-like RNA polymerase II, p300/CBP-associated factor (PCAF)-associated factor (predicted)	Taf6l_predicted	-1.38517
1398439_a_at	origin recognition complex, subunit 6-like (S. cerevisiae) (predicted)	Orc6l_predicted	-1.38548
1372478_at	similar to LNV	LOC501065	-1.38551
1378357_at	Transcribed locus	---	-1.38559
1376211_a_at	potassium channel tetramerisation domain containing 6 (predicted)	Kctd6_predicted	-1.38625
1388340_at	Ns5atp9 protein	RGD:1303041	-1.38651
1396521_at	StAR-related lipid transfer (START) domain containing 4 (predicted)	Stard4_predicted	-1.38667
1394022_at	inhibitor of DNA binding 4	Idb4	-1.38676
1392065_at	Transcribed sequences	---	-1.3878
1376868_at	Similar to cobl-related 1 (LOC311088), mRNA	---	-1.38858
1371853_at	mitochondrial ribosomal protein L42 (predicted) /// similar to RIKEN cDNA 2900055D03	Mrpl42_predicted /// LOC367117	-1.38861
1392111_at	exosome component 3 (predicted)	Exosc3_predicted	-1.38877
1394359_at	similar to DUF729 domain containing 1	LOC364500	-1.38956
1397419_at	Transcribed sequences	---	-1.38997
1372406_at	minichromosome maintenance deficient 3 (S. cerevisiae) (predicted) /// similar to DNA replication licensing factor MCM3 (DNA polymerase alpha holoenzyme-associated protein P1) (P1-MCM3)	Mcm3_predicted /// LOC367976	-1.39051
1375368_at	similar to RIKEN cDNA 1700012G19 gene (predicted)	RGD1307773_predicted	-1.39078
1391889_at	Transcribed locus	---	-1.39104
1367776_at	cell division cycle 2 homolog A (S. pombe)	Cdc2a	-1.39135
1382596_a_at	similar to hypothetical protein FLJ20254 (predicted)	RGD1311324_predicted	-1.39163
1379448_at	Similar to protein kinase (EC 2.7.1.-) esk splice form 2 - mouse (LOC315852), mRNA	---	-1.392
1374828_at	protein disulfide isomerase-associated 5	Pdia5	-1.39264
1383308_a_at	similar to hypothetical protein FLJ34389 (predicted)	RGD1305243_predicted	-1.39344
1367743_at	phosphofructokinase, liver, B-type	Pfkl	-1.39386
1390982_at	chromatin assembly factor 1, subunit B (p60) (predicted)	Chaf1b_predicted	-1.39416
1370054_at	cyclin-dependent kinase inhibitor 2C (p18, inhibits CDK4)	Cdkn2c	-1.39503
1378177_at	Similar to gem (nuclear organelle) associated protein 5; hypothetical protein C330013N08 (LOC303160), mRNA	---	-1.39641
1387271_at	phytanoyl-CoA hydroxylase	Phyh	-1.39673
1386970_at	eukaryotic translation initiation factor 2B, subunit 4 delta	Eif2b4	-1.39679
1373176_at	Polymerase (DNA-directed), delta 3, accessory subunit (predicted)	---	-1.39683
1367777_at	2,4-dienoyl CoA reductase 1, mitochondrial	Decr1	-1.3972
1389117_at	O-sialoglycoprotein endopeptidase (predicted)	Osgep_predicted	-1.39775
1377299_at	nuclear autoantigenic sperm protein	Nasp	-1.39788
1372952_at	similar to RIKEN cDNA 2310061F22	LOC292069	-1.39817
1371955_at	mitochondrial ribosomal protein L35 (predicted)	Mrpl35_predicted	-1.39858
1373671_at	Transcribed locus	---	-1.39876
1382186_a_at	similar to RIKEN cDNA 2610029K21 (predicted)	RGD1311086_predicted	-1.3994
1375941_at	similar to RIKEN cDNA 1300006M19 (predicted)	RGD1308452_predicted	-1.39961
1373406_at	Torsin family 1, member B (predicted)	---	-1.39977
1371999_at	Similar to dJ862K6.2.2 (splicing factor, arginine/serine-rich 6 (SRP55-2)(isoform 2))	---	-1.40017
1386913_at	glycoprotein 38	Gp38	-1.40035
1375980_at	nucleoredoxin (predicted)	Nxn_predicted	-1.40086
1376291_at	similar to WD repeat domain 4	LOC499412	-1.40154
1372590_at	C1q and tumor necrosis factor related protein 1	C1qtnf1	-1.40164
1398373_at	UDP-Gal:betaGlcNAc beta 1,3-galactosyltransferase, polypeptide 3 (predicted)	B3galt3_predicted	-1.40235
1389844_at	FK506 binding protein 4	Fkbp4	-1.40249
1371926_at	Interleukin 6 signal transducer	Il6st	-1.4034
1375669_at	similar to binding protein	LOC293702	-1.40342
1372596_at	similar to RIKEN cDNA 1110007L15 (predicted)	RGD1311660_predicted	-1.40376
1394259_at	Transcribed locus	---	-1.40401
1382464_at	similar to ENSANGP00000021391 (predicted)	RGD1309779_predicted	-1.40421
1392615_at	Transcribed locus	---	-1.4043
1382858_at	intimal thickness-related receptor	MGC94555	-1.40505
1385105_at	similar to DKFZP434B168 protein (predicted)	RGD1308014_predicted	-1.40556
1371310_s_at	serine (or cysteine) proteinase inhibitor, clade H, member 1	Serpinh1	-1.40597
1399058_at	mitochondrial ribosomal protein L18 (predicted)	Mrpl18_predicted	-1.40623
1372704_at	similar to RIKEN cDNA 2310008M10	LOC362040	-1.40632
1380148_at	Transcribed locus	---	-1.40658
1378104_at	similar to RIKEN cDNA 8430406I07 (predicted)	RGD1307465_predicted	-1.40664
1392330_at	similar to N6-DNA-methyltransferase isoform 1 (predicted)	RGD1311843_predicted	-1.40807
1389911_at	similar to cDNA sequence BC019776	LOC316842	-1.40808
1398608_at	similar to hypothetical gene supported by BC007071 (predicted)	RGD1311868_predicted	-1.40897
1370809_at	tubulin, gamma 1	Tubg1	-1.40983
1374630_at	chloride intracellular channel 3 (predicted)	Clic3_predicted	-1.41018
1389446_at	small nuclear ribonucleoprotein polypeptide A' (predicted)	Snrpa1_predicted	-1.41043
1395560_at	Transcribed locus	---	-1.41045
1367612_at	microsomal glutathione S-transferase 1	Mgst1	-1.41079
1367676_at	high mobility group box 2 /// similar to High mobility group protein 2 (HMG-2) /// similar to High mobility group protein 2 (HMG-2) /// similar to High mobility group protein 2 (HMG-2)	Hmgb2 /// LOC498072 /// LOC498388 /// LOC498988	-1.41101
1393456_at	Transcribed locus	---	-1.4113
1390109_at	Transcribed sequences	---	-1.41152
1371332_at	Transcribed locus, strongly similar to XP_545386.1 PREDICTED: similar to Histone H1.2 (H1d) [Canis familiaris]	---	-1.41158
1388833_at	similar to DNA polymerase epsilon p17 subunit (DNA polymerase epsilon subunit 3) (Chromatin accessibility complex 17) (HuCHRAC17) (CHRAC-17)	MGC94182	-1.4121
1379235_x_at	similar to CDC45L	LOC287961	-1.41243
1389176_at	Inositol polyphosphate-5-phosphatase F (predicted)	---	-1.41246
1393197_at	abhydrolase domain containing 8 (predicted)	Abhd8_predicted	-1.41334
1388647_at	Transcribed sequence with moderate similarity to protein ref:NP_077276.1 (H.sapiens) hypothetical protein MGC2217 [Homo sapiens]	---	-1.41379
1368916_at	argininosuccinate lyase	Asl	-1.41384
1391201_at	Transcribed locus	---	-1.41457
1372655_at	Transcribed sequence with moderate similarity to protein pdb:1LBG (E. coli) B Chain B, Lactose Operon Repressor Bound To 21-Base Pair Symmetric Operator Dna, Alpha Carbons Only	---	-1.41465
1369636_at	sorbitol dehydrogenase	Sord	-1.41514
1374961_at	Similar to polyamine-modulated factor 1 (LOC295232), mRNA	---	-1.41581
1398354_at	catenin alpha-like 1 (predicted)	Catnal1_predicted	-1.41622
1374576_at	similar to mKIAA0841 protein	LOC361546	-1.41641
1389360_at	FXYD domain-containing ion transport regulator 3	Fxyd3	-1.41647
1389593_at	Kinesin heavy chain member 2	Kif2	-1.41671
1390461_at	Transcribed locus	---	-1.41689
1377350_at	Transcribed locus	---	-1.4177
1382370_at	cyclin F	Ccnf	-1.41778
1377387_a_at	similar to RIKEN cDNA 1810009K13	LOC498110	-1.4179
1374559_at	Ring finger protein 26 (predicted)	---	-1.41816
1389073_at	similar to RIKEN cDNA 2700029E10 (predicted)	RGD1306561_predicted	-1.41907
1392061_at	minichromosome maintenance deficient 10 (S. cerevisiae) (predicted)	Mcm10_predicted	-1.41922
1367967_at	leprecan 1	Lepre1	-1.41937
1388695_at	serine hydroxymethyl transferase 2 (mitochondrial) (predicted)	Shmt2_predicted	-1.41949
1373745_at	general transcription factor II H, polypeptide 4	RGD:1303309	-1.4197
1373398_at	Tripartite motif protein 37 (predicted)	---	-1.42061
1390836_at	Transcribed sequences	---	-1.4207
1380725_at	transmembrane 4 superfamily member 9	RGD:1303176	-1.42078
1387031_at	endoplasmic retuclum protein 29	Erp29	-1.42079
1374916_at	Transcribed locus	---	-1.42088
1370838_s_at	alpha-spectrin 2 /// hypothetical gene supported by NM_171983	Spna2 /// LOC497766	-1.42227
1372370_at	similar to hypothetical protein FLJ14494 (predicted)	RGD1311268_predicted	-1.42272
1376123_at	ADP-ribosylation factor 1 GTPase activating protein	---	-1.4232
1368725_at	jagged 1	Jag1	-1.4236
1372997_at	Similar to hypothetical protein FLJ23305 (predicted)	---	-1.42364
1370415_at	Ras association (RalGDS/AF-6) domain family 5	Rassf5	-1.42392
1392507_at	Transcribed locus	---	-1.42402
1392461_at	PRP4 pre-mRNA processing factor 4 homolog (yeast) (predicted)	Prpf4_predicted	-1.4247
1387083_at	cardiotrophin 1	Ctf1	-1.42512
1374543_at	Transcribed locus	---	-1.42523
1371966_at	protein-L-isoaspartate (D-aspartate) O-methyltransferase 1	Pcmt1	-1.4257
1379514_at	Transcribed locus	---	-1.42571
1376037_at	achalasia, adrenocortical insufficiency, alacrimia (Allgrove, triple-A) (predicted)	Aaas_predicted	-1.42598
1376687_at	ubiquitin specific protease 1 (predicted)	Usp1_predicted	-1.42602
1389230_at	Arrestin domain containing 3	Arrdc3	-1.42611
1389537_at	Treacher Collins Franceschetti syndrome 1, homolog (predicted)	Tcof1_predicted	-1.42649
1383786_at	Transcribed locus	---	-1.42708
1393000_at	amphiphysin	---	-1.42745
1372009_at	Tyrosyl-tRNA synthetase (predicted)	---	-1.42754
1388135_at	replication protein A2	Rpa2	-1.42789
1389755_at	Transcribed locus, strongly similar to NP_666152.1 cDNA sequence BC006933 [Mus musculus]	---	-1.42789
1397341_at	PDZ binding kinase (predicted)	---	-1.42808
1373668_at	polymerase (RNA) II (DNA directed) polypeptide I (predicted)	Polr2i_predicted	-1.4288
1374661_at	similar to RIKEN cDNA 2410004H02	LOC361571	-1.43077
1374033_at	Proteasome (prosome, macropain) subunit, beta type 10 (predicted)	---	-1.43089
1383284_at	Neural cell adhesion molecule 1	Ncam1	-1.43115
1374728_at	Transcribed locus	---	-1.4321
1376369_at	trophinin associated protein (tastin) (predicted)	Troap_predicted	-1.43275
1398304_at	frizzled homolog 2 (Drosophila)	Fzd2	-1.43474
1383176_at	similar to C11orf17 protein (predicted)	RGD1306959_predicted	-1.43506
1384308_at	Transcribed locus	---	-1.4355
1392040_at	similar to 2810453L12Rik protein (predicted)	RGD1306255_predicted	-1.4362
1371780_at	KDEL (Lys-Asp-Glu-Leu) endoplasmic reticulum protein retention receptor 2 (predicted)	Kdelr2_predicted	-1.43676
1384252_at	similar to hypothetical protein BC015148 (predicted)	RGD1309095_predicted	-1.43686
1382348_at	dihydroorotate dehydrogenase	Dhodh	-1.43697
1391733_at	Transcribed locus	---	-1.43705
1373263_at	similar to SUMO/sentrin specific protease 5	LOC499312	-1.43743
1391578_at	Similar to modulator of estrogen induced transcription (LOC315792), mRNA	---	-1.4375
1371542_at	similar to Tubulin alpha-4 chain (Alpha-tubulin 4)	MGC94628	-1.43801
1376377_at	Transcribed locus	---	-1.43806
1374107_at	elaC homolog 2 (E. coli)	Elac2	-1.43858
1371715_at	LOC500651	MGC112883	-1.439
1370948_a_at	myristoylated alanine rich protein kinase C substrate	Marcks	-1.43926
1378507_at	Transcribed locus	---	-1.43938
1382276_at	coronin, actin binding protein 1C (predicted)	Coro1c_predicted	-1.43956
1373980_at	similar to XPA binding protein 1	LOC500619	-1.44065
1380088_at	Transcribed locus	---	-1.44179
1373026_at	similar to RIKEN cDNA 2410030K01 (predicted)	RGD1307631_predicted	-1.44215
1368229_at	survival of motor neuron protein interacting protein 1	Sip1	-1.44228
1378296_at	Similar to RIKEN cDNA A730011O11 (LOC296125), mRNA	---	-1.4428
1388488_at	LSM3 homolog, U6 small nuclear RNA associated (S. cerevisiae) (predicted)	Lsm3_predicted	-1.44337
1375020_at	Ras and Rab interactor 3 (predicted)	Rin3	-1.44452
1397628_at	similar to RIKEN cDNA 2900092E17 (predicted)	RGD1305592_predicted	-1.4458
1376247_at	phosphoenolpyruvate carboxykinase 2 (mitochondrial) (predicted)	Pck2_predicted	-1.4458
1375110_at	Transcribed locus	---	-1.44585
1390415_at	Thyroid hormone receptor interactor 13 (predicted)	---	-1.44598
1374105_at	hypoxia induced gene 1	RGD:620215	-1.44697
1389435_at	Transcribed locus	---	-1.44741
1389738_at	uracil-DNA glycosylase (predicted)	Ung_predicted	-1.44757
1379195_s_at	ligase I, DNA, ATP-dependent /// ligase I, DNA, ATP-dependent (predicted)	Lig1 /// Lig1_predicted	-1.44788
1388936_at	cadherin 11	Cdh11	-1.44817
1393914_at	similar to Ftsj homolog	LOC363450	-1.44826
1383279_at	chromosome condensation 1-like	Chc1l	-1.44913
1372145_at	threonyl-tRNA synthetase	Tars	-1.44918
1394509_at	Heterogeneous nuclear ribonucleoprotein A/B	Hnrpab	-1.4493
1372820_at	Transcribed locus	---	-1.4494
1398648_at	malignant fibrous histiocytoma amplified sequence 1 (predicted)	Mfhas1_predicted	-1.45081
1389598_at	ceroid-lipofuscinosis, neuronal 6 (predicted)	Cln6_predicted	-1.45127
1374668_at	splicing factor 3a, subunit 1 (predicted)	Sf3a1_predicted	-1.45184
1397872_at	UI-R-AD0-wb-c-10-0-UI.s1 UI-R-AD0 Rattus norvegicus cDNA clone UI-R-AD0-wb-c-10-0-UI 3', mRNA sequence.	---	-1.45204
1382077_at	Transcribed locus	---	-1.45229
1388890_at	Transcribed locus, moderately similar to XP_580018.1 PREDICTED: hypothetical protein XP_580018 [Rattus norvegicus]	---	-1.45299
1382797_at	similar to 1500019C06Rik protein	LOC296750	-1.45373
1385426_at	similar to hypothetical protein FLJ20647 (predicted)	RGD1305326_predicted	-1.45423
1391148_at	Transcribed locus	---	-1.45463
1379849_at	THO complex 3 (predicted)	---	-1.45473
1376087_at	similar to RIKEN cDNA 1300010M03	LOC360632	-1.45491
1371040_at	sodium-dependent neutral amino acid transporter ASCT2	Slc1a5	-1.45536
1390878_at	mucin 1, transmembrane	Muc1	-1.45608
1376758_at	inhibitor of growth family, member 1 (predicted)	Ing1_predicted	-1.45615
1367983_at	flap structure-specific endonuclease 1	Fen1	-1.45616
1390185_at	mRNA decapping enzyme	Dcps	-1.45764
1377268_at	similar to RIKEN cDNA 1200014M14 (predicted)	RGD1310597_predicted	-1.45827
1383619_at	Transcribed sequences	---	-1.45902
1383578_at	Transcribed locus	---	-1.45903
1394039_at	Kruppel-like factor 5	Klf5	-1.46012
1389222_at	Bq135360	---	-1.46031
1373895_at	Transcribed sequence with moderate similarity to protein sp:P00722 (E. coli) BGAL_ECOLI Beta-galactosidase	---	-1.46093
1375981_a_at	similar to Su(var)3-9 homolog	LOC302553	-1.46104
1374483_at	Transcribed locus	---	-1.46139
1393342_at	Solute carrier family 25 (mitochondrial carrier; ornithine transporter) member 15 (predicted)	---	-1.46143
1371849_at	similar to hypothetical protein FLJ12442 (predicted)	RGD1305524_predicted	-1.46161
1372091_at	MID1 interacting G12-like protein	RGD:1303258	-1.46163
1393036_at	Similar to Myosin-binding protein H (MyBP-H) (H-protein) (LOC310782), mRNA	---	-1.46198
1370906_at	branched chain keto acid dehydrogenase E1, beta polypeptide	Bckdhb	-1.46279
1388858_at	mitogen activated protein kinase kinase 3 (predicted)	Map2k3_predicted	-1.46341
1381145_at	Transcribed locus	---	-1.46463
1377016_at	similar to RIKEN cDNA 5730592L21 (predicted)	RGD1310614_predicted	-1.46496
1385644_at	ring finger protein 121 (predicted)	Rnf121_predicted	-1.465
1388506_at	Desmoplakin (predicted)	---	-1.46552
1383500_at	ribosome binding protein 1 homolog 180kDa (dog) (predicted)	Rrbp1_predicted	-1.46604
1393431_at	Ribosomal protein L36a (predicted)	---	-1.46619
1370461_at	hyaluronan mediated motility receptor	Hmmr	-1.46661
1373642_at	Similar to hypothetical protein (LOC310628), mRNA	---	-1.46741
1392975_at	Transcribed locus, strongly similar to NP_115695.1 chromosome 2 open reading frame 7 [Homo sapiens]	---	-1.46786
1374540_at	Cell division cycle associated 7 (predicted)	---	-1.46805
1391161_at	Similar to Wolf-Hirschhorn syndrome candidate 1 protein isoform 1; IL5 promoter REII region-binding protein; trithorax/ash1-related protein 5; multiple myeloma SET domain protein (LOC305456), mRNA	---	-1.46811
1371988_at	mannosidase 1, alpha (predicted)	Man1a_predicted	-1.46814
1368204_at	ligase I, DNA, ATP-dependent /// ligase I, DNA, ATP-dependent (predicted)	Lig1 /// Lig1_predicted	-1.46842
1371908_at	NTF2-related export protein 1 (predicted)	Nxt1_predicted	-1.46877
1378076_at	Hypothetical LOC287173 (predicted)	---	-1.46934
1379348_at	exosome component 2 (predicted)	Exosc2_predicted	-1.46992
1376050_at	TAF5 RNA polymerase II, TATA box binding protein (TBP)-associated factor (predicted)	Taf5_predicted	-1.4712
1388881_at	Similar to RIKEN cDNA 1700012G19 gene (predicted)	---	-1.47142
1374927_at	Transcribed locus	---	-1.47311
1390481_a_at	similar to RIKEN cDNA 2700084L22 (predicted)	RGD1310816_predicted	-1.474
1371887_at	similar to high mobility group protein homolog HMG4	LOC305373	-1.47405
1383489_at	Interleukin 6 signal transducer	Il6st	-1.47415
1368671_at	sushi-repeat-containing protein	Srpx	-1.47466
1398406_at	Transcribed locus	---	-1.47521
1370197_a_at	protein kinase C, zeta	Prkcz	-1.47616
1394182_at	Myotubularin related protein 4 (predicted)	---	-1.47629
1367834_at	spermidine synthase	Srm	-1.47777
1368773_at	follicle stimulating hormone primary response gene 1	Fshprh1	-1.47924
1375889_at	similar to spermine synthase	LOC363469	-1.47932
1373457_at	inhibitor of growth family, member 1 (predicted)	Ing1_predicted	-1.48014
1372188_at	Similar to hypothetical protein D15Ertd785e	---	-1.48074
1388539_at	plakophilin 2 (predicted)	Pkp2_predicted	-1.48169
1381280_at	similar to methylenetetrahydrofolate dehydrogenase (NAD) (EC 1.5.1.15) / methenyltetrahydrofolate cyclohydrolase (EC 3.5.4.9) precursor - mouse (predicted)	RGD1310879_predicted	-1.48236
1368189_at	7-dehydrocholesterol reductase	Dhcr7	-1.48259
1378274_at	Transcribed locus	---	-1.48269
1380500_s_at	similar to binding protein	LOC293702	-1.48355
1376055_at	Transcribed locus	---	-1.48534
1397949_at	Similar to PALS2-beta splice variant (LOC362359), mRNA	---	-1.48558
1387826_at	similar to pyridoxal (pyridoxine, vitamin B6) kinase	LOC361819	-1.48759
1378027_at	poliovirus receptor-related 3 (predicted)	Pvrl3_predicted	-1.48775
1389573_at	similar to RIKEN cDNA 1810008K03 (predicted)	RGD1307153_predicted	-1.48792
1389616_at	Transcribed locus	---	-1.4895
1383278_at	centaurin, gamma 2 (predicted)	Centg2_predicted	-1.4901
1388201_at	bone morphogenetic protein 6	Bmp6	-1.49036
1379541_at	Transcribed sequence with moderate similarity to protein ref:NP_116202.1 (H.sapiens) hypothetical protein FLJ14624 [Homo sapiens]	---	-1.4927
1368525_at	MRS2-like, magnesium homeostasis factor (S. cerevisiae)	Mrs2l	-1.49297
1374734_at	similar to RIKEN cDNA 2810025M15 (predicted)	RGD1304982_predicted	-1.49433
1390384_at	similar to Histone H2A.x (H2a/x)	LOC500987	-1.4946
1394761_at	similar to Rho-GTPase-activating protein 26 (Oligophrenin-1 like protein) (GTPase regulator associated with focal adhesion kinase)	LOC300350	-1.49466
1377689_at	kinetochore associated 1 (predicted)	Kntc1_predicted	-1.49482
1378482_at	kidney cell line derived transcript 1 (predicted)	Kdt1_predicted	-1.49522
1378199_at	Transcribed locus	---	-1.49653
1371567_at	aldehyde dehydrogenase family 7, member A1 (predicted)	Aldh7a1_predicted	-1.4966
1383574_at	similar to mannosyl-oligosaccharide alpha-1,2-mannosidase /// mannosidase 1, alpha (predicted)	LOC294410 /// Man1a_predicted	-1.49661
1389408_at	Transcribed locus	---	-1.49675
1390137_at	TRAF4 associated factor 1	RGD:1303240	-1.49839
1391067_at	Transcribed sequence with moderate similarity to protein sp:P00722 (E. coli) BGAL_ECOLI Beta-galactosidase	---	-1.49879
1390126_at	Transcribed sequences	---	-1.49931
1371862_at	ribonucleotide reductase M1	Rrm1	-1.50021
1376312_a_at	CGI-146 protein	---	-1.50099
1369018_at	forkhead box M1	Foxm1	-1.50109
1383292_at	inner centromere protein antigens 135/155kDa (predicted)	Incenp_predicted	-1.5015
1392570_at	ATP-binding cassette, sub-family D (ALD), member 4 (predicted)	Abcd4_predicted	-1.50289
1377223_at	Transcribed sequences	---	-1.50345
1383737_at	Transcribed locus	---	-1.50365
1372493_at	similar to RIKEN cDNA 2410005K17 (predicted)	RGD1311232_predicted	-1.50531
1382466_at	similar to RIKEN cDNA 6530403A03 (predicted)	RGD1309020_predicted	-1.50559
1376684_at	discs, large homolog 7 (Drosophila) (predicted)	Dlg7_predicted	-1.50587
1372945_at	inhibitor of growth family, member 3 (predicted)	Ing3_predicted	-1.50682
1376180_at	Transcribed sequences	---	-1.50792
1393706_at	six transmembrane epithelial antigen of the prostate (predicted)	Steap_predicted	-1.50885
1368872_a_at	homer homolog 2 (Drosophila)	Homer2	-1.50926
1392701_at	similar to GDP-mannose pyrophosphorylase B	LOC363145	-1.50936
1392563_at	Rho GTPase activating protein 8 (predicted)	Arhgap8_predicted	-1.50964
1393405_at	Transcribed locus	---	-1.51082
1378264_at	Nuclear autoantigenic sperm protein	Nasp	-1.51131
1385297_at	RecQ protein-like 4 (predicted)	Recql4_predicted	-1.51158
1389582_at	Stromal cell-derived factor 2-like 1 (predicted)	---	-1.51166
1390891_at	similar to Kinesin family member 11	LOC499350	-1.51198
1378240_at	Fanconi anemia D2 protein	RGD:1303172	-1.51259
1383976_at	FK506 binding protein 14 (predicted)	---	-1.51261
1368079_at	pyruvate dehydrogenase kinase 1	Pdk1	-1.51562
1384265_at	polymerase (DNA-directed), delta 3, accessory subunit (predicted)	Pold3_predicted	-1.51794
1380547_at	chloride channel 3	Clcn3	-1.51855
1388458_at	replication factor C (activator 1) 4 (predicted)	Rfc4_predicted	-1.51885
1391264_at	Similar to chromosome 20 open reading frame 155 (predicted)	---	-1.51889
1372903_at	Similar to 3000004C01Rik protein (LOC303575), mRNA	---	-1.52118
1392899_at	protein regulator of cytokinesis 1 (predicted)	Prc1_predicted	-1.52288
1370462_at	hyaluronan mediated motility receptor	Hmmr	-1.52298
1371790_at	mitochondrial ribosomal protein L45 (predicted)	Mrpl45_predicted	-1.52356
1385865_at	similar to RIKEN cDNA 2510040D07	LOC501048	-1.52381
1388911_at	DNA primase, p58 subunit	Prim2	-1.52397
1384338_at	similar to CDC45L	LOC287961	-1.52527
1385428_at	exportin 4 (predicted)	Xpo4_predicted	-1.52804
1386879_at	lectin, galactose binding, soluble 3	Lgals3	-1.52883
1373489_at	similar to chromatin assembly factor-I p150 subunit	LOC363333	-1.52904
1389228_at	Similar to RIKEN cDNA 2010309E21 (predicted)	---	-1.53096
1388913_at	phosphatidic acid phosphatase type 2c	Ppap2c	-1.53137
1387795_at	polymerase (DNA directed), alpha 2	Pola2	-1.53146
1382984_at	UI-R-Y0-mb-f-08-0-UI.s1 UI-R-Y0 Rattus norvegicus cDNA clone UI-R-Y0-mb-f-08-0-UI 3', mRNA sequence.	---	-1.53162
1388182_at	DNA primase, p49 subunit	RGD:621380	-1.53209
1373740_at	Transcribed locus, weakly similar to XP_418630.1 PREDICTED: similar to ORF2 [Gallus gallus]	---	-1.53401
1393738_s_at	malignant fibrous histiocytoma amplified sequence 1 (predicted)	Mfhas1_predicted	-1.53515
1387803_at	protein phosphatase 2 (formerly 2A), regulatory subunit B (PR 52), beta isoform	Ppp2r2b	-1.53532
1388920_at	bone morphogenetic protein 6	Bmp6	-1.53544
1372818_at	collectin sub-family member 12	Colec12	-1.53754
1382661_at	nucleoporin 160 (predicted)	Nup160_predicted	-1.5382
1386979_at	developmentally regulated protein TPO1	Tpo1	-1.53887
1393330_at	Transcribed sequences	---	-1.53963
1384042_at	Transcribed locus	---	-1.54081
1383568_at	tubulin, epsilon 1 (predicted)	Tube1_predicted	-1.54082
1373037_at	ubiquitin-conjugating enzyme E2L 6 (predicted)	Ube2l6_predicted	-1.541
1382317_at	Transcribed locus	---	-1.54118
1373384_at	Similar to Ppp2r5c protein (LOC362786), mRNA	---	-1.54141
1394419_at	similar to RIKEN cDNA 6530401L14 gene (predicted)	RGD1309107_predicted	-1.54225
1392942_at	similar to hypothetical protein MGC17943	LOC362857	-1.54274
1385619_at	similar to Kinesin family member 11	LOC499350	-1.54284
1393844_at	similar to myeloid leukemia factor 1 interacting protein	LOC306464	-1.54285
1396101_at	stanniocalcin 1	Stc1	-1.54314
1390141_at	Similar to 2410004L15Rik protein (LOC361472), mRNA	---	-1.54411
1388957_at	Similar to hypothetical protein D10Ertd641e	---	-1.54513
1367857_at	fatty acid desaturase 1	Fads1	-1.54741
1388010_at	Antisense RNA overlapping MCH protein	---	-1.54747
1394320_at	cyclin dependent kinase 2	Cdk2	-1.54749
1383962_at	Cd27 binding protein (Hindu God of destruction)	Siva	-1.54798
1389555_at	transcription factor 19	RGD:1302974	-1.54813
1379404_at	Transcribed locus	---	-1.54874
1370420_at	steroid 5 alpha-reductase 1	Srd5a1	-1.54889
1380611_at	FK506 binding protein 5 (predicted)	Fkbp5_predicted	-1.54932
1370020_at	solute carrier family 25 (mitochondrial carrier; dicarboxylate transporter), member 10	RGD:621430	-1.5499
1388791_at	similar to 2810022L02Rik protein (predicted)	RGD1309930_predicted	-1.55063
1374912_at	PREDICTED: Rattus norvegicus kinesin-related protein 2 (Kif2c), mRNA	---	-1.55142
1384295_at	heat shock protein hsp70-related protein	RGD:1303296	-1.55245
1372966_at	hypothetical LOC298504 (predicted)	RGD1310174_predicted	-1.55322
1374524_at	selenocysteine lyase	Scly	-1.55415
1382774_at	Transcribed sequences	---	-1.55558
1370052_at	3-phosphoinositide dependent protein kinase-1	Pdpk1	-1.55587
1379234_a_at	similar to CDC45L	LOC287961	-1.55663
1371074_a_at	mini chromosome maintenance deficient 6 (S. cerevisiae)	Mcmd6	-1.55711
1383958_at	cell division cycle associated 2 (predicted)	Cdca2_predicted	-1.55764
1388996_at	Similar to RIKEN cDNA 3110052N05 (predicted)	---	-1.55852
1383536_at	Similar to hypothetical protein 2BE2121 - Chinese hamster (fragment)	Dhfr	-1.55909
1381933_at	Replication factor C (activator 1) 5 (predicted)	---	-1.56012
1370348_at	ninjurin 1	Ninj1	-1.56082
1373823_at	similar to Cyclin-dependent kinases regulatory subunit 2 (CKS-2)	LOC498709	-1.56118
1377954_at	Transcribed locus	---	-1.56179
1382232_at	Transcribed locus	---	-1.56181
1387581_at	peptidylglycine alpha-amidating monooxygenase COOH-terminal interactor	Pamci	-1.56229
1381758_at	similar to MDM2 Binding protein	LOC500870	-1.56282
1388194_at	dihydrolipoamide S-acetyltransferase (E2 component of pyruvate dehydrogenase complex)	Dlat	-1.56353
1367811_at	3-phosphoglycerate dehydrogenase	Phgdh	-1.56373
1372957_at	Transcribed locus	---	-1.56475
1393655_at	RAD54 like (S. cerevisiae) (predicted)	Rad54l_predicted	-1.5649
1373610_at	Similar to Protein transport protein Sec24D (SEC24-related protein D) (LOC310843), mRNA	---	-1.56499
1371445_at	similar to ribosome-binding protein p34 - rat (predicted)	RGD1305092_predicted	-1.56514
1375993_at	Transcribed locus	---	-1.56551
1373897_at	lamin B1	---	-1.56714
1380243_at	similar to CG14803-PA (predicted)	RGD1304693_predicted	-1.56723
1393262_at	Transcribed locus	---	-1.56776
1373612_at	Transcribed locus	---	-1.56815
1382592_at	Similar to RIKEN cDNA 2600001J17 (LOC303037), mRNA	---	-1.5682
1390372_at	Mitogen activated protein kinase kinase kinase 12	Map3k12	-1.56824
1389326_at	replication factor C (activator 1) 3 (predicted)	Rfc3_predicted	-1.56855
1392589_at	replication factor C (activator 1) 5 (predicted)	Rfc5_predicted	-1.56904
1375523_at	Similar to Myristoylated alanine-rich C-kinase substrate (MARCKS) (ACAMP-81)	Marcks	-1.57077
1389349_s_at	similar to interleukin 17 receptor E isoform 1	Il17re	-1.57198
1389440_at	Transcribed locus	---	-1.57379
1367744_at	melanoma antigen, family D, 2	Maged2	-1.57467
1391199_at	Fas (TNFRSF6)-associated via death domain	Fadd	-1.57595
1383357_a_at	Transcribed locus, strongly similar to NP_722482.1 Bcl-2-associated transcription factor [Mus musculus]	---	-1.57783
1393817_at	UI-R-C2-na-g-01-0-UI.s1 UI-R-C2 Rattus norvegicus cDNA clone UI-R-C2-na-g-01-0-UI 3', mRNA sequence.	---	-1.57812
1373928_at	similar to interleukin 17 receptor E isoform 1	Il17re	-1.57894
1372267_at	proteasome (prosome, macropain) 26S subunit, non-ATPase, 5 (predicted)	Psmd5_predicted	-1.57982
1391780_at	similar to hypothetical protein MGC16491 (predicted)	RGD1308967_predicted	-1.58023
1395342_at	cytoskeleton-associated protein 4 (predicted)	Ckap4_predicted	-1.58236
1374906_at	similar to RIKEN cDNA 2810428C21	LOC313450	-1.58306
1374216_at	Transcribed locus	---	-1.58558
1370063_at	nuclear receptor subfamily 2, group F, member 2	Nr2f2	-1.58645
1390542_at	Transcribed locus	---	-1.58724
1390469_at	nurim (nuclear envelope membrane protein)	RGD:1302966	-1.58769
1370949_at	myristoylated alanine rich protein kinase C substrate	Marcks	-1.58848
1391046_at	similar to SET and MYND domain containing 3	LOC498295	-1.58947
1372317_at	EH-domain containing 1 (predicted)	Ehd1_predicted	-1.58948
1372523_at	glutamate-cysteine ligase, catalytic subunit	Gclc	-1.58963
1373722_at	kinesin family member 20A (predicted)	Kif20a_predicted	-1.58967
1376231_at	similar to Hypothetical UPF0080 protein KIAA0186	LOC499914	-1.59416
1393452_at	Similar to carbonic anhydrase 9 (LOC313495), mRNA	---	-1.59442
1385638_at	Transcribed sequences	---	-1.59573
1372685_at	cyclin-dependent kinase inhibitor 3 (predicted)	Cdkn3_predicted	-1.5958
1370393_at	coiled-coil domain containing 5	Ccdc5	-1.59673
1389566_at	cyclin B2 (predicted)	Ccnb2_predicted	-1.59708
1370281_at	fatty acid binding protein 5, epidermal	Fabp5	-1.59819
1384606_at	similar to hypothetical protein FLJ13909 (predicted)	RGD1306994_predicted	-1.59852
1398349_at	adenylate kinase 2	Ak2	-1.59991
1378197_at	kinesin family member C2	KIFC2	-1.60397
1370999_at	sperm associated antigen 5	Spag5	-1.60505
1398732_at	Transcribed locus	---	-1.60641
1372401_at	N-acetylneuraminic acid synthase (sialic acid synthase) (predicted)	Nans_predicted	-1.6078
1375014_at	Hypothetical LOC301598 (LOC301598), mRNA	---	-1.60834
1397918_at	Transcribed locus, strongly similar to NP_963999.1 helicase with SNF2 domain 1 [Mus musculus]	---	-1.6094
1392640_at	cryptochrome 1 (photolyase-like)	Cry1	-1.6094
1369380_at	kinesin-related protein 2	Kif2c	-1.60954
1398442_at	similar to chromosome 14 open reading frame 80 (predicted)	RGD1311091_predicted	-1.60958
1374225_at	CDNA clone IMAGE:7314743	---	-1.61054
1397294_at	Similar to small nuclear ribonucleoprotein B	Snrpb	-1.61144
1373432_at	myristoylated alanine rich protein kinase C substrate	Marcks	-1.61164
1378016_at	Echinoderm microtubule associated protein like 4 (predicted)	---	-1.61243
1392440_at	Transcribed locus	---	-1.61287
1368811_at	lamin B1	Lmnb1	-1.61441
1372326_at	Solute carrier family 2 (facilitated glucose transporter), member 3	Slc2a3	-1.61609
1387898_at	heat shock protein, alpha-crystallin-related, B6	Hspb6	-1.61656
1398606_at	golgi phosphoprotein 4 (predicted)	Golph4_predicted	-1.61795
1373140_at	Interleukin 6 signal transducer	Il6st	-1.6182
1387793_at	ERM-binding phosphoprotein	Slc9a3r1	-1.62001
1368202_a_at	disabled homolog 2 (Drosophila)	Dab2	-1.62142
1372870_at	KDEL (Lys-Asp-Glu-Leu) endoplasmic reticulum protein retention receptor 3 (predicted)	Kdelr3_predicted	-1.62269
1388812_at	similar to novel protein	LOC287550	-1.62287
1372610_at	procollagen-proline, 2-oxoglutarate 4-dioxygenase (proline 4-hydroxylase), alpha II polypeptide (predicted)	P4ha2_predicted	-1.62386
1392541_at	similar to RIKEN cDNA A030007L17; EST AA673177 (predicted) /// similar to RIKEN cDNA A030007L17	RGD1304876_predicted /// LOC362370	-1.62421
1376485_at	TRAF-interacting protein (predicted)	Traip_predicted	-1.62522
1385733_at	exonuclease 1 (predicted)	Exo1_predicted	-1.62614
1397633_at	UI-R-CT0s-caq-e-12-0-UI.s1 UI-R-CT0s Rattus norvegicus cDNA clone UI-R-CT0s-caq-e-12-0-UI 3', mRNA sequence.	---	-1.62746
1368052_at	transmembrane 4 superfamily member 3	Tm4sf3	-1.62769
1378066_at	Transcribed locus	---	-1.63072
1394009_at	Transcribed locus, weakly similar to XP_537141.1 PREDICTED: similar to REST corepressor 3 [Canis familiaris]	---	-1.63214
1392467_at	inositol (myo)-1(or 4)-monophosphatase 2	Impa2	-1.633
1390915_at	Transcribed locus, strongly similar to XP_538131.1 PREDICTED: similar to zinc finger, CW-type with coiled-coil domain 2 [Canis familiaris]	---	-1.63359
1371817_at	similar to myo-inositol 1-phosphate synthase A1	LOC290651	-1.63382
1373119_at	potassium channel tetramerisation domain containing 3 (predicted)	Kctd3_predicted	-1.63509
1376062_at	syndecan 1	Sdc1	-1.63605
1370416_at	Max dimerization protein 3	Mxd3	-1.63613
1380259_at	similar to RIKEN cDNA 2410017P07 (predicted)	RGD1311358_predicted	-1.63663
1373658_at	Transcribed locus	---	-1.63716
1375148_at	PREDICTED: Rattus norvegicus zinc finger protein 469 (predicted) (Znf469_predicted), mRNA	---	-1.63724
1376185_at	kinesin family member C1	Kifc1	-1.63794
1368453_at	fatty acid desaturase 2	Fads2	-1.63835
1374805_at	similar to hypothetical protein MGC5528	LOC299933	-1.63944
1376807_at	RAB, member of RAS oncogene family-like 3 (predicted)	Rabl3_predicted	-1.63981
1375353_at	Cdk5 and Abl enzyme substrate 1 (predicted)	---	-1.64015
1395376_at	DEAD/H (Asp-Glu-Ala-Asp/His) box polypeptide 11 (CHL1-like helicase homolog, S. cerevisiae) (predicted)	Ddx11_predicted	-1.64064
1377940_at	hypothetical LOC287534	MGC94755	-1.64108
1380217_at	Similar to HEC protein (LOC301701), mRNA	---	-1.64114
1370957_at	interleukin 6 signal transducer	Il6st	-1.64198
1368727_at	solute carrier family 7 (cationic amino acid transporter, y+ system), member 9	Slc7a9	-1.64199
1383926_at	budding uninhibited by benzimidazoles 1 homolog, beta (S. cerevisiae)	Bub1b	-1.64218
1393451_at	similar to RIKEN cDNA 2610510J17 (predicted)	RGD1310953_predicted	-1.64294
1373035_at	Transcribed locus, weakly similar to XP_341951.1 PREDICTED: Protein tyrosine phosphatase, receptor type, epsilon polypeptide [Rattus norvegicus]	---	-1.64499
1370821_at	Thiopurine methyltransferase	Ocln	-1.64524
1379479_at	kinesin family member 4	Kif4	-1.64601
1372479_at	Transcribed locus	---	-1.64718
1388750_at	Transferrin receptor	Tfrc	-1.6487
1385874_at	Transcribed locus	---	-1.64944
1367673_at	selenium binding protein 2	Selenbp1	-1.65236
1390226_at	similar to hypothetical protein LOC340061	LOC498840	-1.65293
1368268_at	thymine-DNA glycosylase	Tdg	-1.65481
1370294_a_at	cell division cycle 20 homolog (S. cerevisiae)	Cdc20	-1.65689
1381749_at	Transcribed locus	---	-1.65981
1393816_at	Transcribed sequences	---	-1.65994
1386059_at	Transcribed locus	---	-1.66275
1374758_at	Transcribed locus	---	-1.66393
1392512_at	histone 3, H2ba (predicted)	Hist3h2ba_predicted	-1.66417
1376105_at	collagen, type XIV, alpha 1 (undulin) (predicted)	Col14a1_predicted	-1.66462
1383660_at	Transcribed locus	---	-1.66488
1385926_at	Transcribed locus, strongly similar to NP_071902.2 constitutive photomorphogenic protein isoform a [Homo sapiens]	---	-1.66491
1390650_at	Pericentrin 1 (predicted)	---	-1.66506
1376951_at	Transcribed locus, moderately similar to XP_533306.1 PREDICTED: similar to Mitotic spindle assembly checkpoint protein MAD2A (MAD2-like 1) (HsMAD2) [Canis familiaris]	---	-1.66542
1392449_at	RAD18 homolog (S. cerevisiae) (predicted)	Rad18_predicted	-1.66641
1380410_at	Transcribed locus, strongly similar to NP_071902.2 constitutive photomorphogenic protein isoform a [Homo sapiens]	---	-1.66671
1377832_at	polo-like kinase 4 (Drosophila) (predicted)	Plk4_predicted	-1.66712
1372516_at	kinesin family member 22 (predicted)	Kif22_predicted	-1.66789
1368020_at	mevalonate (diphospho) decarboxylase	Mvd	-1.6683
1369373_at	fibroblast growth factor receptor 3	Fgfr3	-1.66866
1383739_at	Transcribed locus, weakly similar to NP_076356.1 RIKEN cDNA 8030498B09 [Mus musculus]	---	-1.66913
1369583_at	Jun dimerization protein 2	RGD:621611	-1.66931
1382459_at	Transcribed sequences	---	-1.67374
1372462_at	similar to acetyl CoA transferase-like	MGC95138	-1.67468
1394243_at	similar to spermine synthase	LOC363469	-1.67654
1378640_at	Ubiquitin-like, containing PHD and RING finger domains, 1	Uhrf1	-1.68016
1376150_at	Transcribed locus	---	-1.68313
1373240_at	dehydrogenase/reductase (SDR family) member 3 (predicted)	Dhrs3_predicted	-1.68354
1387276_at	activity and neurotransmitter-induced early gene protein 4 (ania-4)	RGD:621187	-1.68385
1391477_at	Transcribed sequence with moderate similarity to protein sp:P13693 (H.sapiens) TCTP_HUMAN Translationally controlled tumor protein	---	-1.68858
1377695_at	Transcribed locus	---	-1.69199
1372156_at	similar to RIKEN cDNA 1810014L12 (predicted)	RGD1307423_predicted	-1.69217
1398227_at	Transcribed locus	---	-1.696
1380011_at	Transcribed sequences	---	-1.69816
1374139_at	similar to cerebellar degeneration-related 2 (predicted)	RGD1310578_predicted	-1.70103
1390640_at	CTF18, chromosome transmission fidelity factor 18 homolog (S. cerevisiae) (predicted)	Chtf18_predicted	-1.70245
1385522_at	origin recognition complex, subunit 1-like (S.cereviaiae)	Orc1l	-1.70253
1388484_at	ubiquitin-conjugating enzyme E2C (predicted)	Ube2c_predicted	-1.70681
1393982_at	polymerase (DNA directed), epsilon 2 (p59 subunit) (predicted)	Pole2_predicted	-1.70782
1389457_at	myeloblastosis oncogene-like 2 (predicted)	Mybl2_predicted	-1.70798
1374087_at	Histone deacetylase 7	Hdac7a	-1.71087
1375661_at	SRY-box containing gene 11	Sox11	-1.71202
1372808_at	similar to methylenetetrahydrofolate dehydrogenase (NAD) (EC 1.5.1.15) / methenyltetrahydrofolate cyclohydrolase (EC 3.5.4.9) precursor - mouse	LOC313410	-1.71443
1370346_at	cyclin B1	Ccnb1	-1.71613
1390823_at	Transcribed locus, weakly similar to NP_116026.1 S-phase kinase-associated protein 2 isoform 2; CDK2/cyclin A-associated protein p45 [Homo sapiens]	---	-1.72005
1367691_at	protein kinase C, delta binding protein	Prkcdbp	-1.72037
1372476_at	fatty acid desaturase 3	Fads3	-1.72274
1394025_at	MAD homolog 6 (Drosophila) (predicted)	Smad6_predicted	-1.72292
1372343_at	exosome component 8 (predicted)	Exosc8_predicted	-1.72389
1374477_at	paired related homeobox 2 (predicted)	Prrx2_predicted	-1.7245
1377424_at	Deoxyuridine triphosphatase	Dutp	-1.7258
1372681_at	Transcribed locus	---	-1.72607
1374449_at	cell division cycle associated 3 /// similar to cell division cycle associated 3	Cdca3 /// LOC501134	-1.72629
1373249_at	Similar to Ubiquitin-like protein 4 (Ubiquitin-like protein GDX)	---	-1.72642
1393617_at	Transcribed sequences	---	-1.72696
1384231_at	CDNA clone MGC:116179 IMAGE:7455942	---	-1.72699
1378653_at	Similar to chromosome 20 open reading frame 155 (predicted)	---	-1.72941
1381878_at	ubinuclein 1 (predicted)	Ubn1_predicted	-1.7301
1395944_at	Transcribed locus	---	-1.73191
1380277_at	Transcribed locus	---	-1.73475
1378874_at	cyclin dependent kinase 2	Cdk2	-1.73584
1378056_at	geminin (predicted)	Gmnn_predicted	-1.73586
1367940_at	chemokine orphan receptor 1	Cmkor1	-1.73675
1391317_at	similar to RIKEN cDNA 2810433K01 (predicted)	RGD1310784_predicted	-1.73839
1377923_at	Transcribed locus, weakly similar to XP_576460.1 PREDICTED: similar to hypothetical protein PB402898.00.0 [Rattus norvegicus]	---	-1.7387
1396183_at	Transcribed sequences	---	-1.74087
1385816_at	Transcribed locus, strongly similar to NP_780591.1 RIKEN cDNA 2700049P18 [Mus musculus]	---	-1.7415
1389660_at	amphoterin induced gene and ORF 3	Amigo3	-1.74186
1377967_at	Transcribed locus	---	-1.74562
1376026_at	downstream neighbor of SON (predicted)	Donson_predicted	-1.74756
1372886_at	transforming acidic coiled coil 3	RGD:1302948	-1.75112
1387895_s_at	cell division cycle 20 homolog (S. cerevisiae)	Cdc20	-1.75119
1374181_at	similar to heterogeneous nuclear ribonucleoprotein G - human	LOC302855	-1.75575
1386937_at	ATPase, Na+/K+ transporting, beta 1 polypeptide	Atp1b1	-1.76079
1376924_a_at	Palmdelphin (predicted)	---	-1.76098
1379582_a_at	cyclin A2	Ccna2	-1.76103
1370345_at	cyclin B1	Ccnb1	-1.76167
1389085_at	Transcribed locus	---	-1.76235
1371924_at	olfactomedin-like 3 (predicted)	Olfml3_predicted	-1.76319
1377962_at	Transcribed locus	---	-1.76327
1371700_at	microfibrillar-associated protein 4 (predicted)	Mfap4_predicted	-1.76408
1385876_at	Similar to Gpc6 protein	---	-1.7652
1367720_at	aminolevulinate, delta-, dehydratase	Alad	-1.77202
1377718_at	similar to CDNA sequence BC022692	LOC501552	-1.77232
1380474_at	Similar to Lysyl oxidase homolog 2 precursor (Lysyl oxidase-like protein 2) (Lysyl oxidase related protein 2) (Lysyl oxidase-related protein WS9-14) (LOC290350), mRNA	---	-1.77233
1372897_at	hypothetical gene supported by NM_175869	LOC497831	-1.77375
1380888_at	EST220066 Normalized rat ovary, Bento Soares Rattus sp. cDNA clone ROVBS36 3' end, mRNA sequence.	---	-1.77863
1392228_at	Similar to chromosome 20 open reading frame 155 (predicted)	---	-1.7803
1372665_at	phosphoserine aminotransferase 1	Psat1	-1.78032
1371928_at	cell division cycle associated 8	Cdca8	-1.7805
1385220_at	Similar to Klotho-LPH related protein (LOC315750), mRNA	---	-1.7817
1378152_at	Transcribed sequences	---	-1.7845
1368799_at	baculoviral IAP repeat-containing 5	Birc5	-1.7849
1382864_at	Palmdelphin (predicted)	---	-1.7863
1370297_at	polo-like kinase 1 (Drosophila)	Plk1	-1.79944
1383434_at	Transcribed locus	---	-1.80828
1374333_at	similar to RIKEN cDNA 1110007C09 (predicted)	RGD1306058_predicted	-1.8111
1391518_at	Transcribed sequences	---	-1.81325
1389756_at	maternal embryonic leucine zipper kinase (predicted)	Melk_predicted	-1.81807
1390892_at	DEP domain containing 1B (predicted)	---	-1.82318
1388644_at	Monoglyceride lipase	Mgll	-1.82569
1379608_at	Transcribed sequences	---	-1.82686
1397248_at	Transcribed locus	---	-1.83419
1377890_at	Transcribed locus	---	-1.83787
1369953_a_at	CD24 antigen	Cd24	-1.83978
1387316_at	chemokine (C-X-C motif) ligand 1	Cxcl1	-1.84876
1377831_at	Monoamine oxidase A	Maoa	-1.85009
1382017_at	Transcribed sequence with moderate similarity to protein pdb:1LBG (E. coli) B Chain B, Lactose Operon Repressor Bound To 21-Base Pair Symmetric Operator Dna, Alpha Carbons Only	---	-1.85513
1370959_at	collagen, type III, alpha 1	Col3a1	-1.86195
1379669_at	Transcribed sequences	---	-1.86551
1372225_at	Transcribed locus	---	-1.86879
1367814_at	ATPase, Na+/K+ transporting, beta 1 polypeptide	Atp1b1	-1.87137
1383684_at	ASF1 anti-silencing function 1 homolog B (S. cerevisiae) (predicted)	Asf1b_predicted	-1.87179
1376339_at	Similar to KIAA1280 protein (LOC317439), mRNA	---	-1.87806
1386321_s_at	tribbles homolog 3 (Drosophila)	Trib3	-1.88057
1380028_at	Transcribed locus	---	-1.88282
1375988_at	DEAD (aspartate-glutamate-alanine-aspartate) box polypeptide 25	---	-1.88389
1375964_at	phosphoserine phosphatase (predicted)	Psph_predicted	-1.89067
1391672_at	Transcribed locus	---	-1.89241
1372132_at	CNDP dipeptidase 2 (metallopeptidase M20 family) (predicted)	Cndp2_predicted	-1.89764
1376039_at	serine/threonine kinase 6	---	-1.90155
1372986_at	Jun dimerization protein 2	---	-1.90476
1393822_at	Transcribed locus	---	-1.91106
1381474_at	similar to mCHCR	LOC302492	-1.91151
1367859_at	transforming growth factor, beta 3	Tgfb3	-1.91176
1384762_at	UI-R-BX0-arh-h-02-0-UI.s1 UI-R-BX0 Rattus norvegicus cDNA clone UI-R-BX0-arh-h-02-0-UI 3', mRNA sequence.	---	-1.91309
1375937_a_at	similar to RIKEN cDNA G630055P03 gene (predicted)	RGD1309383_predicted	-1.91676
1372631_at	EST216530 Normalized rat muscle, Bento Soares Rattus sp. cDNA clone RMUAY57 3' end, mRNA sequence.	---	-1.91743
1398618_s_at	Similar to hypothetical protein FLJ32743 (predicted)	---	-1.92068
1385359_at	UI-R-BJ2-bps-c-09-0-UI.s1 UI-R-BJ2 Rattus norvegicus cDNA clone UI-R-BJ2-bps-c-09-0-UI 3', mRNA sequence.	---	-1.92412
1394501_at	sialic acid binding Ig-like lectin 10 (predicted)	Siglec10_predicted	-1.93784
1368619_at	DEAD (Asp-Glu-Ala-Asp) box polypeptide 25	Ddx25	-1.952
1375060_at	similar to Cc2-27 (predicted)	RGD1310244_predicted	-1.95645
1379072_at	Transcribed locus	---	-1.95645
1370864_at	collagen, type 1, alpha 1	Col1a1	-1.95732
1367714_at	eukaryotic translation initiation factor 2B, subunit 2 beta	Eif2b2	-1.96011
1394031_at	similar to Protein C20orf129 homolog	LOC311598	-1.97866
1374157_at	phosphodiesterase 4B	---	-1.99953
1370678_s_at	monoamine oxidase A	Maoa	-2.01576
1391898_at	Transcribed locus	---	-2.02643
1375638_at	serum deprivation response protein	Sdpr	-2.0451
1372226_at	Transcribed locus, strongly similar to NP_055665.1 SLIT-ROBO Rho GTPase-activating protein 2; SLIT-ROBO Rho GTPase-activating protein 3; WAVE-associated Rac GTPase activating protein [Homo sapiens]	---	-2.0464
1387753_s_at	membrane-associated guanylate kinase-related (MAGI-3)	Magi3	-2.08886
1369590_a_at	DNA-damage inducible transcript 3	Ddit3	-2.11021
1387280_a_at	tumor-associated protein 1	Slc7a5	-2.14074
1370072_at	membrane metallo endopeptidase	Mme	-2.14202
1372006_at	Transcribed locus	---	-2.1472
1385506_at	Transcribed sequences	---	-2.14861
1382776_at	similar to O-acyltransferase (membrane bound) domain containing 1	LOC498741	-2.15101
1371518_at	Nidogen (entactin)	Nid	-2.15734
1375879_at	G protein-coupled receptor 48	Gpr48	-2.15903
1367847_at	nuclear protein 1	Nupr1	-2.16541
1375532_at	Inhibitor of DNA binding 2, dominant negative helix-loop-helix protein	Id2	-2.17874
1389145_at	CDC42 effector protein (Rho GTPase binding) 2 (predicted)	Cdc42ep2_predicted	-2.20184
1398866_at	membrane-associated guanylate kinase-related (MAGI-3)	Magi3	-2.20648
1397958_at	T-cell activation GTPase activating protein (predicted)	---	-2.2318
[truncated: 36 more rows]

## Sheet: WB311
WB311 Cells
Probe ID	Gene Title	Gene Symbol	Fold Change
1380455_at	Transcribed locus, moderately similar to NP_694996.2 hypothetical protein FLJ35880 [Homo sapiens]	---	2.25214
1372016_at	growth arrest and DNA-damage-inducible 45 beta (predicted)	Gadd45b_predicted	2.15996
1393782_at	Pleiomorphic adenoma gene-like 1	Plagl1	2.102
1368290_at	cysteine rich protein 61	Cyr61	2.00984
1381798_at	LIM domain only protein 7	RGD:1302984	1.97683
1388111_at	elastin	Eln	1.97598
1368321_at	early growth response 1	Egr1	1.97512
1369519_at	endothelin 1	Edn1	1.93843
1395753_at	elastin	Eln	1.91098
1390024_at	Similar to osteoclast inhibitory lectin	---	1.90656
1373740_at	Transcribed locus, weakly similar to XP_418630.1 PREDICTED: similar to ORF2 [Gallus gallus]	---	1.88913
1385355_at	Ephrin A5	Efna5	1.88307
1373843_at	Transcribed locus	---	1.84649
1383110_at	Dre1 protein	Dre1	1.84269
1373900_at	keratin complex 2, basic, gene 7 (predicted)	Krt2-7_predicted	1.83947
1390300_at	UI-R-DM1-cka-h-18-0-UI.s1 UI-R-DM1 Rattus norvegicus cDNA clone UI-R-DM1-cka-h-18-0-UI 3', mRNA sequence.	---	1.83098
1377795_at	Transcribed locus	---	1.80288
1386611_at	Dre1 protein	Dre1	1.79782
1398281_at	thiopurine methyltransferase	Tpmt	1.78792
1385008_at	Transcribed locus	---	1.78743
1372993_at	Insulin-like growth factor 2 receptor	Igf2r	1.77895
1393308_at	Transcribed locus	---	1.76009
1385704_at	Transcribed sequence with strong similarity to protein pir:T17293 (H.sapiens) T17293 hypothetical protein DKFZp434G162.1 - human	---	1.75448
1392999_at	Transcribed sequences	---	1.74779
1367631_at	connective tissue growth factor	Ctgf	1.74544
1374038_at	Transcribed locus	---	1.73737
1397217_at	CUG triplet repeat,RNA-binding protein 2	Cugbp2	1.73504
1383300_at	Dre1 protein	Dre1	1.72822
1394778_at	Nuclear factor I/B	Nfib	1.72431
1377695_at	Transcribed locus	---	1.72054
1373651_at	Transcribed locus	---	1.70283
1392105_at	Phosphatase and actin regulator 2	Phactr2	1.69677
1383565_at	Transcribed locus	---	1.68829
1376105_at	collagen, type XIV, alpha 1 (undulin) (predicted)	Col14a1_predicted	1.68368
1370064_at	presenilin 2	Psen2	1.65746
1389986_at	LOC499304	---	1.63883
1368200_at	chemokine (C-X3-C motif) ligand 1	Cx3cl1	1.63873
1376282_at	Transcribed locus	---	1.63551
1385171_s_at	UI-R-BJ1-avw-h-10-0-UI.s1 UI-R-BJ1 Rattus norvegicus cDNA clone UI-R-BJ1-avw-h-10-0-UI 3', mRNA sequence.	---	1.6334
1377551_at	Transcribed locus	---	1.62638
1376334_at	Transcribed locus	---	1.61387
1378606_at	similar to hypothetical protein MGC37079 (predicted)	RGD1310484_predicted	1.61097
1368349_at	fibroblast growth factor binding protein 1	Fgfbp1	1.61006
1390866_at	Transcribed sequences	---	1.60556
1393729_at	neuropilin (NRP) and tolloid (TLL)-like 2 (predicted)	Neto2_predicted	1.60058
1370269_at	cytochrome P450, family 1, subfamily a, polypeptide 1	Cyp1a1	1.59625
1387122_at	pleiomorphic adenoma gene-like 1	Plagl1	1.59432
1378753_at	thiopurine methyltransferase	Tpmt	1.59113
1374089_at	Transcribed locus	---	1.58337
1384904_at	neuropilin (NRP) and tolloid (TLL)-like 2 (predicted)	Neto2_predicted	1.57757
1385001_at	gasdermin domain containing 1 (predicted)	Gsdmdc1_predicted	1.57343
1388500_at	Transcribed locus	---	1.57013
1374758_at	Transcribed locus	---	1.56516
1380168_at	ets variant gene 4 (E1A enhancer binding protein, E1AF) (predicted)	Etv4_predicted	1.55838
1396034_at	carboxylesterase 615	LOC307660	1.55234
1373164_at	Serine/threonine kinase 17b (apoptosis-inducing)	Stk17b	1.55145
1388786_at	Transcribed locus	---	1.55141
1393615_at	Transcribed locus	---	1.55029
1372467_at	Transcribed locus	---	1.54859
1382481_a_at	a disintegrin and metalloprotease domain 33 (predicted)	Adam33_predicted	1.5482
1374990_at	Ribosomal protein L22	Rpl22	1.54363
1389533_at	fibulin 2	Fbln2	1.54349
1390943_at	similar to hypothetical protein dJ465N24.2.1	LOC362626	1.54176
1396539_at	Actinin, alpha 1	Actn1	1.53901
1391407_at	Ephrin A5	Efna5	1.53803
1371091_at	unknown protein	RGD:708546	1.52985
1391718_at	Ephrin A5	Efna5	1.52965
1368419_at	ceruloplasmin	Cp	1.52909
1392012_at	Transcribed locus, strongly similar to NP_659097.2 epiplakin 1 [Mus musculus]	---	1.52887
1369146_a_at	aryl hydrocarbon receptor	Ahr	1.52706
1372124_at	eukaryotic translation initiation factor 4B (predicted)	Eif4b_predicted	1.51666
1375726_at	LIM domain only protein 7	RGD:1302984	1.51479
1389337_at	Transcribed locus	---	1.51129
1383786_at	Transcribed locus	---	1.51126
1388600_at	CDNA clone IMAGE:7320582	---	1.50726
1370927_at	procollagen, type XII, alpha 1	Col12a1	1.50233
1384260_at	UI-R-BU0-aoy-c-03-0-UI.s1 UI-R-BU0 Rattus norvegicus cDNA clone UI-R-BU0-aoy-c-03-0-UI 3', mRNA sequence.	---	1.50112
1371954_at	Transcribed sequence with strong similarity to protein pir:T17293 (H.sapiens) T17293 hypothetical protein DKFZp434G162.1 - human	---	1.50028
1397492_at	Similar to LIM domain only 7 (LOC309583), mRNA	---	1.49847
1373750_at	leprecan-like 2 (predicted)	Leprel2_predicted	1.49815
1380751_at	Annexin A3	Anxa3	1.49781
1371974_at	phytanoyl-CoA dioxygenase domain containing 1 (predicted)	Phyhd1_predicted	1.49765
1378699_at	polycystic kidney and hepatic disease 1-like 1 (predicted)	Pkhd1l1_predicted	1.4941
1398238_at	Transcribed locus	---	1.49228
1370517_at	hypothetical gene supported by NM_153735	LOC497675	1.49113
1381125_at	Transmembrane 4 superfamily member 3	Tm4sf3	1.48903
1377736_at	Transcribed locus	---	1.48846
1378032_at	Similar to molecule possessing ankyrin-repeats induced by lipopolysaccharide; IkappaB-zeta (LOC304005), mRNA	---	1.48839
1371500_at	latent transforming growth factor beta binding protein 4 (predicted)	Ltbp4_predicted	1.48479
1370488_a_at	protein tyrosine phosphatase, receptor type, D	Ptprd	1.48458
1397772_at	CDNA clone IMAGE:7320582	---	1.48082
1378414_at	similar to hypothetical protein	LOC311323	1.47762
1368114_at	fibroblast growth factor 13	Fgf13	1.47458
1388920_at	bone morphogenetic protein 6	Bmp6	1.47317
1383149_at	Transcribed locus	---	1.47104
1373696_at	LOC362536 (LOC362536), mRNA	---	1.47076
1378038_at	Transcribed locus	---	1.47017
1393338_at	UI-R-BO1-ajo-e-09-0-UI.s1 UI-R-BO1 Rattus norvegicus cDNA clone UI-R-BO1-ajo-e-09-0-UI 3', mRNA sequence.	---	1.46864
1391046_at	similar to SET and MYND domain containing 3	LOC498295	1.46792
1383075_at	cyclin D1	Ccnd1	1.46768
1368896_at	MAD homolog 7 (Drosophila)	Madh7	1.46173
1374650_at	neural precursor cell expressed, developmentally down-regulated gene 9 (predicted)	Nedd9_predicted	1.45263
1371376_at	similar to Gene model 461	LOC500252	1.45105
1396053_at	neural precursor cell expressed, developmentally down-regulated gene 9 (predicted)	Nedd9_predicted	1.45094
1367940_at	chemokine orphan receptor 1	Cmkor1	1.44962
1393129_at	UI-R-AF0-yb-e-10-0-UI.s1 UI-R-AF0 Rattus norvegicus cDNA clone UI-R-AF0-yb-e-10-0-UI 3', mRNA sequence.	---	1.44809
1372760_at	LOC499304	---	1.44304
1373540_at	Similar to heterogeneous nuclear ribonucleoprotein A2/B1 (LOC362361), mRNA	---	1.4419
1386718_at	similar to aldo-keto reductase family 1, member C12	LOC307096	1.44161
1368146_at	dual specificity phosphatase 1	Dusp1	1.44103
1372657_at	similar to hypothetical protein MGC5576 (predicted)	RGD1311532_predicted	1.44079
1382138_at	similar to hypothetical protein FLJ20433	LOC499745	1.44028
1371643_at	cyclin D1	Ccnd1	1.43968
1367725_at	serine/threonine-protein kinase pim-3	Pim3	1.43937
1389307_at	similar to Amyloid beta (A4) precursor-like protein 1	LOC502317	1.43729
1369793_a_at	melanoma cell adhesion molecule	Mcam	1.43688
1372964_at	Transcribed locus	---	1.4359
1371510_at	host cell factor C1 regulator 1 (XPO1-dependent)	Hcfc1r1	1.43563
1388698_at	extracellular matrix protein 1	Ecm1	1.43563
1394387_at	Transcribed locus	---	1.43505
1371813_at	HIRA interacting protein 3 (predicted)	---	1.43211
1388464_at	Similar to Hypothetical protein KIAA0076 (LOC363191), mRNA	---	1.43142
1397420_at	Transcribed sequences	---	1.43031
1379631_at	colony stimulating factor 1 (macrophage)	Csf1	1.43013
1378081_at	Transcribed locus	---	1.42053
1395297_at	similar to hypothetical protein FLJ10652 (predicted)	RGD1309621_predicted	1.41927
1368565_at	solute carrier family 1 (glial high affinity glutamate transporter), member 3	Slc1a3	1.41699
1368308_at	myelocytomatosis viral oncogene homolog (avian)	Myc	1.41581
1386716_at	Similar to EF-hand domain (C-terminal) containing 1	---	1.41577
1368441_at	mesothelin	Msln	1.41561
1390945_at	zinc finger protein 292	Znf292	1.41451
1372708_at	Transcription factor-like 4 (predicted)	---	1.41432
1379896_at	DEAD (Asp-Glu-Ala-Asp) box polypeptide 42 (predicted)	Ddx42_predicted	1.41372
1393437_at	Transcribed locus	---	1.41304
1382487_at	Similar to testis expressed protein 14 isoform 1 (LOC287603), mRNA	---	1.41181
1395436_at	Protein phosphatase 3, catalytic subunit, alpha isoform	Ppp3ca	1.41048
1377180_at	Transcribed locus, strongly similar to NP_067312.1 superkiller viralicidic activity 2-like [Mus musculus]	---	1.4101
1378996_at	zinc finger protein 282 (predicted)	Zfp282_predicted	1.40916
1371361_at	similar to tensin	LOC301509	1.40843
1392990_at	SRY-box containing gene 17 (predicted)	Sox17_predicted	1.40529
1374803_at	Proteasome (prosome, macropain) 26S subunit, non-ATPase, 11 (predicted)	---	1.40326
1388932_at	laminin, alpha 5	Lama5	1.40325
1391841_at	Tropomyosin 1, alpha	Tpm1	1.40095
1393225_at	CDNA clone IMAGE:7312771, with apparent retained intron	---	1.40062
1378098_at	Transcribed locus	---	1.3991
1367650_at	lipocalin 7	Lcn7	1.39872
1398364_at	similar to hypothetical protein dJ465N24.2.1	LOC362626	1.3987
1382050_at	Transcribed locus	---	1.39727
1368676_at	dynein, cytoplasmic, heavy polypeptide 2 /// hypothetical gene supported by NM_023024	Dnch2 /// LOC497827	1.39723
1379904_at	Similar to hypothetical protein MGC2650 (LOC292693), mRNA	---	1.39686
1368324_at	breast cancer 2	Brca2	1.39538
1373288_at	suppression of tumorigenicity 5 (predicted)	St5_predicted	1.39431
1378211_s_at	Transcribed sequences	---	1.39408
1392553_at	thrombospondin, type I domain containing 6 (predicted)	Thsd6_predicted	1.39385
1374535_at	Similar to expressed sequence AU041783 (LOC292130), mRNA	---	1.39297
1387502_at	serine/threonine kinase 17b (apoptosis-inducing)	Stk17b	1.39291
1372081_at	Transcribed locus, strongly similar to NP_065605.1 TH1 homolog [Mus musculus]	---	1.39253
1371202_a_at	nuclear factor I/B	Nfib	1.39216
1395359_at	Spectrin beta 2	Spnb2	1.39211
1390041_at	SRY-box containing gene 17 (predicted)	Sox17_predicted	1.39158
1373291_at	rho GTPase activating protein 7	---	1.39048
1397004_at	Nuclear receptor subfamily 3, group C, member 1	Nr3c1	1.39045
1397529_at	DEAD (Asp-Glu-Ala-Asp) box polypeptide 17 (predicted)	Ddx17_predicted	1.39021
1388751_at	RNA binding motif protein 24 (predicted)	Rbm24_predicted	1.3901
1371595_at	Transcribed locus	---	1.38899
1383164_at	Transcribed locus	---	1.38829
1371150_at	cyclin D1	Ccnd1	1.38679
1380583_s_at	colony stimulating factor 1 (macrophage)	Csf1	1.38619
1369783_a_at	neuregulin 1	Nrg1	1.38589
1379524_at	WD repeat domain 34	Wdr34	1.38475
1389538_at	nuclear factor of kappa light chain gene enhancer in B-cells inhibitor, alpha	Nfkbia	1.38473
1389180_at	Similar to phosphorylase kinase (EC 2.7.1.38) beta chain, non-muscle - rabbit	---	1.38438
1385506_at	Transcribed sequences	---	1.38424
1373089_at	cadherin 3, type 1, P-cadherin (placental)	Cdh3	1.384
1394995_at	Transcribed locus	---	1.38189
1387402_at	myosin, heavy polypeptide 9	Myh9	1.38091
1396175_at	similar to Zinc finger protein 62 homolog (Zfp-62) (ZT3)	LOC497894	1.38065
1382158_at	Transcribed locus	---	1.38022
1388038_at	attractin	Atrn	1.37879
1375647_at	Transcribed locus	---	1.37821
1373570_at	aminopeptidase-like 1 (predicted)	Npepl1_predicted	1.37815
1370599_a_at	protein tyrosine phosphatase, receptor type, D	Ptprd	1.37736
1396359_at	Transcribed locus	---	1.37696
1371471_at	glioma tumor suppressor candidate region gene 2	RGD:1303085	1.37684
1380174_at	Transcribed locus	---	1.37678
1382942_at	Transcribed locus	---	1.37644
1395794_at	tropomyosin 1, alpha	Tpm1	1.37411
1373969_at	SH3 domain protein 4	Sh3d4	1.37324
1368550_at	HNF-3/forkhead homolog-1 /// hypothetical gene supported by NM_022858	Foxq1 /// LOC497713	1.37264
1397164_at	Transcribed locus	---	1.37104
1371004_at	sortilin 1	Sort1	1.37013
1379936_at	Tropomyosin 1, alpha	Tpm1	1.37
1377427_at	Transcribed locus	---	1.36866
1392470_at	delangin (predicted)	NIPBL_predicted	1.36759
1393004_at	Transcribed locus	---	1.36647
1367722_at	dipeptidylpeptidase 7	Dpp7	1.3657
1379268_at	Similar to LOC443645 protein	---	1.36568
1383533_at	Transcribed locus	---	1.36559
1367568_a_at	matrix Gla protein	Mgp	1.36527
1387439_at	EGF-like-domain, multiple 3	Egfl3	1.36511
1370416_at	Max dimerization protein 3	Mxd3	1.36508
1380155_at	Transcribed locus	---	1.36446
1381577_at	Transcribed sequences	---	1.36437
1387788_at	Jun-B oncogene	Junb	1.36366
1377154_at	Transcribed locus	---	1.36356
1388773_at	similar to [Mouse primary response gene B94 mRNA, 3end.], gene product	LOC299339	1.36335
1376971_at	similar to autophagy 10-like	LOC361876	1.36254
1394109_at	Thrombospondin 2 (predicted)	TSP-2	1.3621
1382037_at	cysteine-rich motor neuron 1 (predicted)	Crim1_predicted	1.36138
1385701_at	Transcribed locus	---	1.36105
1374786_at	Transcribed sequences	---	1.3608
1385380_at	UI-R-C1-ke-c-08-0-UI.s1 UI-R-C1 Rattus norvegicus cDNA clone UI-R-C1-ke-c-08-0-UI 3', mRNA sequence.	---	1.36066
1390471_at	Tropomyosin 1, alpha	Tpm1	1.3598
1387901_at	protein tyrosine phosphatase, receptor type, D	Ptprd	1.35927
1388401_at	Similar to actin-binding protein homolog ABP-278 (LOC306204), mRNA	---	1.35916
1377238_at	Guanosine monophosphate reductase 2	Gmpr2	1.35896
1367594_at	biglycan	Bgn	1.35892
1377045_at	Transcribed locus	---	1.35881
1382493_at	Transcribed locus	---	1.3585
1389250_at	Transcribed locus	---	1.35765
1385904_at	cold inducible RNA binding protein	Cirbp	1.35747
1373295_at	oligonucleotide/oligosaccharide-binding fold containing 1 (predicted)	Obfc1_predicted	1.3573
1367636_at	insulin-like growth factor 2 receptor	Igf2r	1.35698
1371362_at	Similar to KDEL (Lys-Asp-Glu-Leu) endoplasmic reticulum protein retention receptor 3 (LOC315131), mRNA	---	1.35432
1379089_at	Transcribed sequences	---	1.35374
1373055_at	Transcribed locus	---	1.35349
1388921_at	Transcribed locus	---	1.35166
1374410_at	Transcribed locus	---	1.35142
1371771_at	Transcribed locus	---	1.34841
1396815_at	LOC501008	LOC501008	1.34802
1367876_at	importin 13	Ipo13	1.34741
1370221_at	WNT1 inducible signaling pathway protein 1	Wisp1	1.34729
1396872_at	Transcribed locus	---	1.34729
1380027_at	Transcribed sequences	---	1.34571
1388230_at	ajuba homolog (Xenopus laevis)	Jub	1.3432
1389107_at	Transcribed locus	---	1.34181
1390494_at	ribosomal protein S24	Rps24	1.3418
1388384_at	Dynein, cytoplasmic, light chain 1	Dnclc1	1.34169
1368050_at	cyclin L1	Ccnl1	1.34133
1394077_at	ras homolog gene family, member E	Arhe	1.34117
1391827_at	filamin, beta (predicted)	Flnb_predicted	1.34064
1371969_at	Caldesmon 1	Cald1	1.33985
1396965_at	Forkhead box O1A	Foxo1a	1.33948
1369949_at	Lutheran blood group (Auberger b antigen included)	Lu	1.33944
1378543_at	Transcribed locus	---	1.33922
1390907_at	Transcribed sequences	---	1.33902
1374903_at	glucosaminyl (N-acetyl) transferase 2, I-branching enzyme /// hypothetical gene supported by NM_001001511	Gcnt2 /// LOC497712	1.33852
1389601_at	CDNA clone IMAGE:7308494	---	1.33699
1384051_at	Transcribed locus	---	1.33683
1373143_at	similar to hypothetical protein FLJ10652 (predicted)	RGD1309621_predicted	1.33665
1387540_at	breast cancer 1 /// hypothetical gene supported by NM_012514	Brca1 /// LOC497672	1.33578
1394038_at	carnitine deficiency-associated gene expressed in ventricle 1	Cdv1	1.33373
1368202_a_at	disabled homolog 2 (Drosophila)	Dab2	1.3331
1393728_at	Transcribed locus	---	1.33256
1389402_at	Transcribed locus	---	1.3321
1371547_at	similar to C10 (predicted)	RGD1309695_predicted	1.33101
1389127_at	MAD homolog 3 (Drosophila)	---	1.33058
1372592_at	histone deacetylase 6	Hdac6	1.32984
1369373_at	fibroblast growth factor receptor 3	Fgfr3	1.32956
1372838_at	Transcribed locus	---	1.32914
1382013_at	RNA binding motif protein 24 (predicted)	Rbm24_predicted	1.32891
1385050_at	zinc finger protein 292	Znf292	1.32884
1374143_at	Transcribed locus	---	1.32833
1394585_at	Transcribed locus	---	1.32791
1388527_at	Transcribed locus	---	1.32688
1386872_at	insulin-like growth factor 2 receptor	Igf2r	1.32612
1373463_at	Collagen, type V, alpha 2	Col5a2	1.32589
1373165_at	Transcribed locus	---	1.32565
1388011_a_at	transforming growth factor, beta 2	Tgfb2	1.32497
1385944_at	Transcribed sequences	---	1.32405
1398134_at	similar to NK10	LOC498945	1.3235
1379085_at	Similar to mKIAA0978 protein	---	1.32344
1389271_at	Transcribed sequences	---	1.32331
1379625_at	Transcribed locus	---	1.32237
1374956_at	pericentriolar material 1	Pcm1	1.32232
1379719_at	Transcribed locus	---	1.32216
1378578_at	similar to chromosome X open reading frame 23	LOC501559	1.32179
1395092_at	Transcribed locus	---	1.32169
1382755_at	Transcribed locus	---	1.32046
1399100_at	Cyclin T2 (predicted)	---	1.32044
1397692_at	cytotoxic granule-associated RNA binding protein 1 (predicted)	Tia1_predicted	1.31925
1388201_at	bone morphogenetic protein 6	Bmp6	1.3191
1376676_a_at	similar to Ab2-008 (predicted)	RGD1305133_predicted	1.31885
1387172_a_at	transforming growth factor, beta 2	Tgfb2	1.31838
1383746_at	protein tyrosine phosphatase, non-receptor type 14 (predicted)	Ptpn14_predicted	1.31828
1371494_at	Transcribed locus	---	1.31775
1378248_at	Similar to amyloid beta (A4) precursor protein-binding, family B, member 2	---	1.31741
1376066_at	Ras homolog gene family, member E	Arhe	1.31718
1395760_at	Similar to membrane protein expressed in epithelial-like lung adenocarcinoma (predicted)	---	1.31675
1382333_at	Transcribed locus	---	1.31513
1383495_at	DNA cross-link repair 1A, PSO2 homolog (S. cerevisiae) (predicted)	Dclre1a_predicted	1.31442
1393956_at	serine/threonine kinase 17b (apoptosis-inducing)	Stk17b	1.31422
1392730_at	Protein phosphatase 1, catalytic subunit, beta isoform	Ppp1cb	1.31413
1374432_at	activated leukocyte cell adhesion molecule	---	1.31207
1370012_at	prostaglandin I2 (prostacyclin) synthase	Ptgis	1.31116
1380525_at	arylsulfatase E (chondrodysplasia punctata 1) (predicted)	Arse_predicted	1.31054
1378152_at	Transcribed sequences	---	1.30998
1370307_at	agrin	Agrn	1.30969
1376895_at	interleukin 16	Il16	1.30949
1382341_at	Similar to mKIAA0978 protein	---	1.30949
1393012_at	similar to novel protein	LOC305467	1.30882
1390876_at	similar to KIAA0377-like protein (predicted)	RGD1311552_predicted	1.30882
1378993_at	Transcribed sequences	---	1.30868
1378447_at	Transcribed locus	---	1.30746
1397811_at	similar to KIAA1731 protein (predicted)	RGD1311723_predicted	1.30559
1370389_at	hypothetical gene supported by NM_138846	LOC497844	1.30531
1382387_at	Transcribed locus	---	1.30426
1373521_at	similar to RIKEN cDNA D430044G18 (predicted)	RGD1309038_predicted	1.30299
1374774_at	Transcribed locus	---	1.30292
1382294_at	Activated leukocyte cell adhesion molecule	Alcam	1.30268
1387770_at	putative ISG12(a) protein	RGD:1303168	1.30201
1373644_at	CDNA clone IMAGE:7308494	---	1.30189
1381190_at	Similar to KIAA0858 protein (LOC361084), mRNA	---	1.30182
1383241_at	complement component 1, r subcomponent (predicted)	C1r_predicted	1.30173
1384144_at	Nucleoredoxin (predicted)	---	1.30166
1376828_at	retinoic acid induced 3 (predicted)	Rai3_predicted	1.30039
1374933_at	melanoma cell adhesion molecule	Mcam	1.29932
1368919_at	placental growth factor	Pgf	1.2988
1395207_at	Transcribed locus	---	1.29866
1380393_at	crystallin, zeta (predicted)	Cryz_predicted	1.29824
1375049_at	latent transforming growth factor beta binding protein 3	---	1.29815
1378061_at	Similar to WD repeat domain 10 isoform 2 (LOC312651), mRNA	---	1.29806
1370234_at	fibronectin 1	Fn1	1.29764
1389360_at	FXYD domain-containing ion transport regulator 3	Fxyd3	1.29666
1371404_at	eukaryotic translation initiation factor 4B (predicted)	Eif4b_predicted	1.29614
1374635_at	A disintegrin and metalloprotease domain 23 (predicted)	---	1.296
1389098_at	Similar to CP2B	---	1.29551
1395214_at	LOC497962	LOC497962	1.29458
1372211_at	v-maf musculoaponeurotic fibrosarcoma oncogene family, protein K (avian)	Mafk	1.29436
1376649_at	Transcribed locus	---	1.29395
1393678_at	similar to CG10084-PA (predicted)	RGD1308297_predicted	1.29392
1386893_at	granulin	Grn	1.29365
1381902_at	Zinc finger protein 292	Znf292	1.2934
1398549_at	Similar to cyclin L1; cyclin L ania-6a (LOC298686), mRNA	---	1.29326
1374573_at	similar to Dynein 2 light intermediate chain (predicted)	RGD1310286_predicted	1.2927
1373211_at	F-box and WD-40 domain protein 4 (predicted)	Fbxw4_predicted	1.29244
1389790_at	Transcribed locus	---	1.29225
1370418_s_at	brain and kidney protein /// hypothetical gene supported by NM_138849	Bk /// LOC497736	1.2919
1394833_at	chimerin (chimaerin) 2	---	1.29142
1392480_at	poly(A) binding protein, nuclear 1	Pabpn1	1.29129
1376498_at	similar to 2900002H16Rik protein (predicted)	RGD1307973_predicted	1.29022
1391472_at	DAZ interacting protein 1 (predicted)	Dzip1_predicted	1.28969
1376325_at	Nuclear factor related to kappa B binding protein (predicted)	---	1.28924
1373666_at	Rap guanine nucleotide exchange factor (GEF) 5	Rapgef5	1.28909
1380512_at	dipeptidase 2 (predicted)	Dpep2_predicted	1.28906
1390100_s_at	HLA-B-associated transcript 1A	Bat1a	1.28901
1389146_at	hypothetical protein LOC498796	LOC498796	1.28891
1368028_at	peripherin 1	Prph1	1.28827
1371725_at	Myosin, heavy polypeptide 9	Myh9	1.28824
1377663_at	ras homolog gene family, member E	Arhe	1.28791
1374252_at	Transcribed sequences	---	1.28762
1380336_at	Transcribed sequences	---	1.28752
1387106_at	SH3-domain binding protein 4	Sh3bp4	1.28749
1392993_at	similar to hypothetical protein MGC37079 (predicted)	RGD1310484_predicted	1.28724
1371652_at	Unknown mRNA sequence	---	1.28706
1394907_at	Transcribed locus	---	1.28683
1394025_at	MAD homolog 6 (Drosophila) (predicted)	Smad6_predicted	1.28679
1375926_at	Transcribed locus	---	1.28676
1393247_at	Transcribed locus	---	1.28643
1382522_at	matrin 3 /// hypothetical gene supported by NM_019149 /// similar to Matrin 3	Matr3 /// LOC497720 /// LOC498557	1.28605
1393555_at	heat shock 90kDa protein 1, beta	RGD:1303075	1.2859
1373608_at	Transcribed locus	---	1.28581
1393428_at	Transcribed locus	---	1.28563
1376749_at	osteoglycin (predicted)	Ogn_predicted	1.28491
1398400_at	protein kinase LYK5	Lyk5	1.28484
1370855_at	cystatin C	Cst3	1.28463
1372168_s_at	insulin-like growth factor binding protein 6	Igfbp6	1.2841
1389313_at	Transcribed locus	---	1.28407
1375009_at	nudix (nucleoside diphosphate linked moiety X)-type motif 14 (predicted)	Nudt14_predicted	1.28354
1396123_at	Similar to RIKEN cDNA 0610012D17 (LOC288044), mRNA	---	1.28321
1392886_a_at	similar to FCRL (predicted)	RGD1306176_predicted	1.28289
1372031_at	Disabled homolog 2 (Drosophila)	Dab2	1.28283
1376905_at	Transcribed locus	---	1.28264
1390821_at	protocadherin alpha 4 /// protocadherin alpha 13 /// protocadherin alpha 10 /// protocadherin alpha 11 /// protocadherin alpha 3 /// protocadherin alpha 8 /// protocadherin alpha 1 /// protocadherin alpha 2 /// protocadherin alpha 5 /// protocadherin alpha 6 /// protocadherin alpha 7 /// protocadherin alpha 9 /// protocadherin alpha subfamily C, 1 /// protocadherin alpha subfamily C, 2 /// protoc…	Pcdha4 /// Pcdha13 /// Pcdha10 /// Pcdha11 /// Pcdha3 /// Pcdha8 /// Pcdha1 /// Pcdha2 /// Pcdha5 /// RGD:735165 /// RGD:735055 /// RGD:735153 /// RGD:735086 /// RGD:735216	1.28242
1377034_at	serine (or cysteine) proteinase inhibitor, clade B, member 1a (predicted)	Serpinb1a_predicted	1.28229
1384280_at	Similar to Opa-interacting protein 5	---	1.28178
1392909_at	Transcribed locus	---	1.28078
1389555_at	transcription factor 19	RGD:1302974	1.28063
1385879_at	Transcribed locus	---	1.28058
1385671_at	Transcribed locus	---	1.28039
1387625_at	insulin-like growth factor binding protein 6	Igfbp6	1.28027
1372617_at	similar to BTB (POZ) domain containing 2	LOC500793	1.27986
1388552_at	sphingomyelin phosphodiesterase 1, acid lysosomal	Smpd1	1.27942
1385274_at	protocadherin beta 19	Pcdhb19	1.27931
1391643_at	Transcribed sequences	---	1.27921
1369594_at	ephrin A5	Efna5	1.27919
1375868_at	Transcribed locus	---	1.27824
1374234_at	GLI-Kruppel family member HKR3 (predicted)	Hkr3_predicted	1.27763
1389546_at	UI-R-BJ2-bqh-f-03-0-UI.s1 UI-R-BJ2 Rattus norvegicus cDNA clone UI-R-BJ2-bqh-f-03-0-UI 3', mRNA sequence.	---	1.27755
1395584_at	CDNA clone IMAGE:7367808	---	1.27718
1375270_at	Transcribed locus	---	1.27696
1387294_at	SH3-domain binding protein 5 (BTK-associated)	Sh3bp5	1.27667
1372138_at	Cut-like 1 (Drosophila)	Cutl1	1.27647
1376169_at	Transcribed locus	---	1.27631
1390706_at	spectrin beta 2	Spnb2	1.27604
1384925_at	Similar to IL-17D	---	1.27542
1387090_a_at	LIM motif-containing protein kinase 2	Limk2	1.27456
1373122_at	ajuba homolog (Xenopus laevis)	Jub	1.27451
1370043_at	activated leukocyte cell adhesion molecule	Alcam	1.27432
1369963_at	platelet-activating factor acetylhydrolase, isoform 1b, alpha1 subunit	RGD:620333	1.27372
1379912_at	Protein kinase C, mu	Prkcm	1.27287
1378462_at	Similar to Cc1-6	---	1.27269
1376659_at	similar to hypothetical protein FLJ12660 (predicted)	RGD1307232_predicted	1.27229
1372586_at	Transcribed locus	---	1.27203
1395387_at	carnitine deficiency-associated gene expressed in ventricle 1	Cdv1	1.27202
1379580_at	chromodomain helicase DNA binding protein 6 (predicted)	Chd6_predicted	1.27201
1399150_at	similar to RIKEN cDNA A630054L15; hypothetical protein MGC38041 (predicted)	RGD1306064_predicted	1.27177
1386587_at	similar to BTB (POZ) domain containing 12	LOC302953	1.27173
1373173_at	Similar to slingshot 1 (LOC304580), mRNA	---	1.27167
1384380_at	Transcribed locus	---	1.27113
1396227_at	mitochondrial ribosome recycling factor (predicted)	Mrrf_predicted	1.27104
1375793_at	Transcribed locus	---	1.27093
1377793_at	similar to hypothetical protein MGC20460 (predicted)	RGD1310651_predicted	1.27059
1393142_at	UI-R-BS0-anw-d-01-0-UI.r1 UI-R-BS0 Rattus norvegicus cDNA clone UI-R-BS0-anw-d-01-0-UI 5', mRNA sequence.	---	1.27055
1388064_a_at	solute carrier family 1 (glial high affinity glutamate transporter), member 3	Slc1a3	1.27033
1368123_at	insulin-like growth factor 1 receptor	Igf1r	1.26952
1376747_at	BAI1-associated protein 1 (predicted)	---	1.26923
1381967_at	RNA-binding region (RNP1, RRM) containing 2 (predicted)	Rnpc2_predicted	1.26923
1375435_at	hypothetical LOC308765 (predicted)	RGD1311021_predicted	1.26917
1383224_at	par-6 (partitioning defective 6) homolog beta (C. elegans) (predicted)	Pard6b_predicted	1.26904
1392707_at	EST201954 Normalized rat ovary, Bento Soares Rattus sp. cDNA clone ROVAR34 3' end, mRNA sequence.	---	1.26887
1373966_at	Retinoic acid induced 1 (predicted)	---	1.26867
1375168_at	histone deacetylase 7	Hdac7a	1.26834
1378010_at	Origin recognition complex, subunit 4	Orc4	1.26774
1374159_at	Similar to RN49018 (predicted)	---	1.26739
1388167_at	nuclear factor I/B	Nfib	1.26691
1398622_at	Cysteine-rich motor neuron 1 (predicted)	---	1.26661
1393309_at	Transcribed locus	---	1.26657
1380746_at	aryl-hydrocarbon receptor repressor	Ahrr	1.26636
1389542_at	centromere protein E (predicted)	Cenpe_predicted	1.26538
1371485_at	Transcribed locus	---	1.26511
1385687_at	similar to RIKEN cDNA 2200001I15	LOC498586	1.26504
1374404_at	v-jun sarcoma virus 17 oncogene homolog (avian)	Jun	1.26417
1384701_at	Transcribed locus	---	1.26414
1393091_at	similar to RIKEN cDNA D130064H19 (predicted)	RGD1311241_predicted	1.26374
1391560_at	human immunodeficiency virus type I enhancer-binding protein 1	---	1.2628
1372172_at	nephronophthisis 1 (juvenile) (predicted)	Nphp1_predicted	1.26263
1369631_at	unconventional myosin Myr2 I heavy chain	---	1.26168
1380358_at	Transcribed sequences	---	1.26155
1386252_at	Transcribed locus	---	1.26146
1390273_at	Transcribed locus	---	1.26133
1373415_at	Transcribed locus	---	1.26119
1384290_at	Similar to RIKEN cDNA C030034J04 (LOC361642), mRNA	---	1.26108
1374453_at	Transcribed locus	---	1.2609
1387803_at	protein phosphatase 2 (formerly 2A), regulatory subunit B (PR 52), beta isoform	Ppp2r2b	1.26083
1373716_at	armadillo repeat containing 5 (predicted)	Armc5_predicted	1.26077
1371727_at	galactosidase, beta 1	---	1.26075
1374321_at	reticulon 3	---	1.26057
1389096_at	Similar to flavoprotein oxidoreductase MICAL2 (LOC365352), mRNA	---	1.26031
1392732_at	nucleolar and spindle associated protein 1 (predicted)	Nusap1_predicted	1.25979
1376816_at	Hypothetical gene supported by NM_012514	Brca1	1.25978
1367673_at	selenium binding protein 2	Selenbp1	1.25887
1370399_at	cytochrome P450, family 4, subfamily b, polypeptide 1	Cyp4b1	1.25858
1371703_at	Similar to AHNAK	Ahnak	1.25852
1373283_at	Thymopoietin	Tmpo	1.25819
1379072_at	Transcribed locus	---	1.25806
1373287_at	similar to bHLH factor Math6	LOC500200	1.25805
1376615_at	TEA domain family member 3 (predicted)	Tead3_predicted	1.2579
1387028_a_at	Inhibitor of DNA binding 1, helix-loop-helix protein (splice variation)	Id1	1.25748
1383579_at	Transcribed locus	---	1.25725
1371940_at	similar to microfilament and actin filament cross-linker protein isoform a	LOC362587	1.25701
1377194_a_at	similar to RIKEN cDNA 2310015N07 (predicted)	RGD1308637_predicted	1.25685
1392204_at	similar to NK10	LOC498945	1.25629
1375857_at	similar to Myoferlin (Fer-1 like protein 3)	LOC309499	1.25593
1394779_at	Transcribed locus	---	1.25591
1388415_at	catenin src (predicted)	Catns_predicted	1.25549
1377697_at	Similar to amyloid beta (A4) precursor protein-binding, family B, member 2	---	1.25471
1376786_a_at	LOC501008	Neo1	1.25464
1367716_at	T-cell immunomodulatory protein	Cda08	1.25462
1377052_at	Tripartite motif protein 26	Trim26	1.25458
1399000_at	Transcribed locus, strongly similar to NP_056620.2 ATPas, class II, type 9B; ATPase, class 2, member b; ATPase 9B, p type; ATPase 9B, class II [Mus musculus]	---	1.25446
1390427_at	Similar to RIKEN cDNA C330027C09 (predicted)	---	1.25391
1376619_at	Similar to protein tyrosine phosphatase, receptor type, D	---	1.25383
1374382_at	Transcribed locus	---	1.25379
1373240_at	dehydrogenase/reductase (SDR family) member 3 (predicted)	Dhrs3_predicted	1.25362
1370216_at	discoidin domain receptor family, member 1	Ddr1	1.25355
1371064_at	pericentriolar material 1	Pcm1	1.25327
1393267_at	PC4 and SFRS1 interacting protein 1	Psip1	1.25325
1375346_at	similar to hypothetical protein FLJ20010	LOC500993	1.25307
1378537_at	Transcribed locus	---	1.25286
1370131_at	caveolin	Cav	1.25281
1369958_at	rhoB gene	Rhob	1.25264
1371046_at	spectrin beta 2	---	1.25263
1389145_at	CDC42 effector protein (Rho GTPase binding) 2 (predicted)	Cdc42ep2_predicted	1.25234
1380668_at	Unknown (protein for MGC:72974)	MGC72974	1.25229
1390105_at	UDP-Gal:betaGlcNAc beta 1,4- galactosyltransferase, polypeptide 2 (predicted)	B4galt2_predicted	1.25214
1398294_at	actinin, alpha 1	Actn1	1.25198
1387377_a_at	p21 (CDKN1A)-activated kinase 1	Pak1	1.25184
1389568_at	family with sequence similarity 26, member B (predicted)	Fam26b_predicted	1.2517
1372069_at	ankyrin repeat domain 15 (predicted)	Ankrd15_predicted	1.2516
1388699_at	mannosidase 2, alpha B1	Man2b1	1.25148
1388587_at	immediate early response 3	RGD:1303321	1.25146
1391454_at	Similar to tyrosine kinase-associated leucine zipper protein LAZipII (LOC293112), mRNA	---	1.2514
1370895_at	collagen, type V, alpha 2	Col5a2	1.25131
1380286_x_at	similar to KIAA1731 protein (predicted)	RGD1311723_predicted	1.25097
1377175_at	Transcribed locus	---	1.25095
1373393_at	similar to Ext1	LOC299907	1.25084
1389093_at	p21 (CDKN1A)-activated kinase 1	---	1.25071
1378680_at	Transcribed sequence with weak similarity to protein sp:O14924 (H.sapiens) RGSC_HUMAN Regulator of G-protein signaling 12	---	1.25066
1380301_at	UI-R-DM1-cke-i-12-0-UI.s1 UI-R-DM1 Rattus norvegicus cDNA clone UI-R-DM1-cke-i-12-0-UI 3', mRNA sequence.	---	1.24957
1379928_at	COP9 constitutive photomorphogenic homolog subunit 3	RGD:1303002	1.24956
1390459_at	Transcribed locus, weakly similar to XP_535264.1 PREDICTED: similar to RIKEN cDNA 4921516M08 [Canis familiaris]	---	1.24869
1388827_at	H2A histone family, member V (predicted) /// similar to H2A histone family, member V isoform 1	H2afv_predicted /// LOC498894	1.24845
1370155_at	procollagen, type I, alpha 2	Col1a2	1.24823
1383614_at	SNF1/AMP-activated protein kinase	1200013b22rik	1.24818
1390536_at	Transcribed locus	---	1.24739
1369981_at	immunoglobulin (CD79A) binding protein 1	Igbp1	1.24731
1384848_at	Transcribed locus, strongly similar to NP_009039.1 elongin B isoform a; transcription elongation factor B, polypeptide 2; transcription elongation factor B (SIII), polypeptide 2 (18kD, elongin B) [Homo sapiens]	---	1.24712
1389684_at	Transcribed locus	---	1.24682
1372696_at	Transcribed locus	---	1.24627
1377892_at	sema domain, immunoglobulin domain (Ig), short basic domain, secreted, (semaphorin) 3 F (predicted)	Sema3f_predicted	1.246
1379029_at	Similar to Zinc finger protein 62 homolog (Zfp-62) (ZT3)	---	1.246
1393452_at	Similar to carbonic anhydrase 9 (LOC313495), mRNA	---	1.24592
1390552_at	Similar to BAI1-associated protein 1; WW domain-containing protein 3; atrophin-1 interacting protein 3 (LOC297463), mRNA	---	1.24555
1376657_at	immunoglobulin superfamily, member 4A (predicted)	Igsf4a_predicted	1.24553
1375173_at	RDCR-0918-3 protein	RGD:708461	1.24543
1375590_at	similar to RIKEN cDNA 5730454B08 (predicted)	RGD1308290_predicted	1.24531
1369961_at	phosphatidic acid phosphatase 2a	Ppap2a	1.24489
1372483_at	zinc finger protein 469 (predicted)	Zfp469_predicted	1.24479
1376653_at	putative homeodomain transcription factor 1	Phtf1	1.2445
1381108_at	similar to hypothetical protein FLJ20436	RGD:1303127	1.24427
1392638_at	Transcribed locus	---	1.244
1383517_at	Transcribed sequences	---	1.24388
1387316_at	chemokine (C-X-C motif) ligand 1	Cxcl1	1.24331
1367880_at	laminin, beta 2	Lamb2	1.243
1374529_at	Thrombospondin 2 (predicted)	TSP-2	1.24291
1374794_at	kinesin-like 7	---	1.24287
1372347_at	Transcribed locus	---	1.24282
1367890_at	caspase 2	Casp2	1.24271
1388418_at	Transcribed locus	---	1.24267
1369732_a_at	sialyltransferase 4B (beta-galactoside alpha-2,3-sialyltransferase)	Siat4b	1.24263
1387036_at	hairy and enhancer of split 1 (Drosophila)	Hes1	1.2421
1396877_at	Transcribed locus	---	1.2421
1371972_at	Similar to Sad1/unc-84-like protein 2 (LOC362961), mRNA	---	1.24172
1391802_at	Transcribed locus	---	1.24163
1369018_at	forkhead box M1	Foxm1	1.24122
1383520_at	serine-arginine-rich splicing regulatory protein 86	---	1.24087
1373887_at	splicing factor 3b, subunit 1	Sf3b1	1.24065
1381871_at	BAI1-associated protein 1 (predicted)	Baiap1_predicted	1.24062
1377706_x_at	UI-R-E0-bx-f-04-0-UI.r1 UI-R-E0 Rattus norvegicus cDNA clone UI-R-E0-bx-f-04-0-UI 5', mRNA sequence.	---	1.2406
1371211_a_at	neuregulin 1	Nrg1	1.24038
1386974_at	pleckstrin homology-like domain, family B, member 1	Phldb1	1.24028
1379487_at	Transcribed locus	---	1.24008
1373964_at	similar to CG9147-PB (predicted)	RGD1305487_predicted	1.24004
1390207_at	Transcribed locus	---	1.23972
1377833_at	Similar to CG6004-PB (LOC295602), mRNA	---	1.2396
1373097_at	Excision repair cross-complementing rodent repair deficiency, complementation group 6 (predicted)	---	1.23958
1389705_at	similar to recombination activating gene 1 gene activation (predicted)	RGD1308478_predicted	1.23929
1378445_at	similar to putative repair and recombination helicase RAD26L	LOC361197	1.23925
1372903_at	Similar to 3000004C01Rik protein (LOC303575), mRNA	---	1.23902
1372585_at	LOC499318	LOC499318	1.23888
1371019_at	tribbles homolog 1 (Drosophila)	Trib1	1.23848
1374144_at	Transcribed locus	---	1.23818
1390121_at	GLIS family zinc finger 2 (predicted)	---	1.23787
1389528_s_at	v-jun sarcoma virus 17 oncogene homolog (avian)	Jun	1.23764
1372720_at	BTB (POZ) domain containing 1 (predicted)	Btbd1_predicted	1.2376
1391079_at	Transcribed sequences	---	1.23747
1374470_at	DEAH (Asp-Glu-Ala-Asp/His) box polypeptide 57 (predicted)	Dhx57_predicted	1.23745
1374446_at	TCDD-inducible poly(ADP-ribose) polymerase (predicted)	Tiparp_predicted	1.23714
1389136_at	protein-kinase, interferon-inducible double stranded RNA dependent inhibitor, repressor of (P58 repressor) (predicted)	Prkrir_predicted	1.23689
1373679_at	Transcribed locus	---	1.23667
1383939_at	Transcribed locus	---	1.23663
1395437_at	Transcribed sequences	---	1.23622
1392244_at	LOC498362	LOC498362	1.23591
1398508_at	similar to polyglutamine-containing protein (predicted)	RGD1310994_predicted	1.23589
1382587_at	Transcribed locus	---	1.23577
1388575_at	Transcribed locus	---	1.23552
1368246_at	adaptor-related protein complex 3, mu 2 subunit	Ap3m2	1.23512
1372281_at	lysophospholipase-like 1 (predicted)	Lyplal1_predicted	1.23475
1381937_at	similar to 60S ribosomal protein L7a	LOC499344	1.23457
1367846_at	S100 calcium-binding protein A4	S100a4	1.23426
1379866_at	Transcribed locus	---	1.23384
1389674_at	zinc finger protein 282 (predicted)	Zfp282_predicted	1.2337
1373930_at	Similar to pericentrin B; kendrin; pericentrin-2 (LOC361823), mRNA	---	1.23328
1377754_at	Transcribed locus	---	1.23287
1374066_at	Similar to 5330440M15Rik protein	---	1.23277
1389564_at	Similar to cyclin L1; cyclin L ania-6a (LOC298686), mRNA	---	1.23269
1398992_at	Transcribed locus	---	1.23245
1394957_at	nischarin (predicted)	Nisch_predicted	1.23242
1389102_at	similar to Dock1 protein	LOC309081	1.23234
1368650_at	TGFB inducible early growth response	Tieg	1.23208
1390122_at	Similar to triggering receptor expressed on myeloid cells-like 1	---	1.2319
1384056_at	Fibroblast growth factor receptor 3	Fgfr3	1.23162
1368176_at	retinoic acid receptor, alpha	Rara	1.23147
1377336_at	sema domain, immunoglobulin domain (Ig), short basic domain, secreted, (semaphorin) 3B (predicted)	Sema3b_predicted	1.23146
1378595_at	Transcribed sequence with strong similarity to protein sp:P00722 (E. coli) BGAL_ECOLI Beta-galactosidase	---	1.23065
1394451_at	annexin A1	Anxa1	1.23061
1378104_at	similar to RIKEN cDNA 8430406I07 (predicted)	RGD1307465_predicted	1.23051
1380775_at	M-phase phosphoprotein 1 (predicted)	Mphosph1_predicted	1.23043
1373227_at	Transcribed sequence with strong similarity to protein pir:JC5022 (H.sapiens) JC5022 UDP-galactose transporter, splice form 2 - human	---	1.23024
1389274_at	similar to RIKEN cDNA 6720485C15	MGC94233	1.23015
1368136_at	thymopoietin	Tmpo	1.22988
1378049_at	similar to Cas-associated zinc finger protein (predicted)	RGD1306498_predicted	1.22972
1368991_at	sphingomyelin phosphodiesterase 3, neutral	Smpd3	1.22966
1383283_at	oculocerebrorenal syndrome of Lowe	Ocrl	1.22948
1397391_at	Transcribed locus	---	1.22945
1392846_at	Transcribed locus	---	1.22926
1371572_at	amyloid beta (A4) precursor protein	---	1.22917
1383570_at	PHD finger protein 3 (predicted)	Phf3_predicted	1.22863
1379329_at	Similar to dimerization cofactor of hepatocyte nuclear factor 1 ( HNF1) from muscle	---	1.22856
1373106_at	Parathyroid hormone regulated sequence (215bp)	---	1.22735
1367505_at	Transcribed locus	---	1.22732
1371325_at	protective protein for beta-galactosidase (predicted)	Ppgb_predicted	1.22701
1375307_at	chromobox homolog 6 (predicted)	Cbx6_predicted	1.227
1399086_at	zinc finger protein 105 (predicted)	Zfp105_predicted	1.22697
1389570_at	similar to putative phosphoinositide 5-phosphatase type II; C62	LOC287533	1.22686
1372197_at	Transcribed locus	---	1.22665
1398481_at	Transcribed locus	---	1.22621
1367901_at	glucuronidase, beta	Gusb	1.2262
1396708_at	similar to hypothetical protein MGC33486 (predicted)	RGD1310680_predicted	1.2261
1398397_at	Similar to Parg1-pending protein (predicted)	B130017i01rik	1.22603
1397405_at	DEAD (Asp-Glu-Ala-Asp) box polypeptide 17 (predicted)	Ddx17_predicted	1.226
1382736_at	Transcribed locus	---	1.22592
1380095_at	similar to WAP four-disulfide core domain protein 8 precursor (Putative protease inhibitor WAP8)	LOC499942	1.2258
1378057_at	similar to fibronectin leucine rich transmembrane protein 3	LOC366205	1.2257
1368266_at	arginase 1	Arg1	1.22534
1368004_at	mitochondrial ribosomal protein L23	Mrpl23	1.2251
1398273_at	ephrin A1	Efna1	1.22494
1374624_at	UDP-N-acetyl-alpha-D-galactosamine:polypeptide N-acetylgalactosaminyltransferase 11 (GalNAc-T11)	Galnt11	1.22493
1372728_at	Sortilin 1	Sort1	1.22432
1377437_at	similar to Veph-A (predicted)	RGD1308217_predicted	1.2241
1388542_at	similar to RIKEN cDNA 2010315L10 (predicted) /// similar to 2010315L10Rik protein	RGD1306660_predicted /// LOC292282	1.22381
1373072_at	Transcribed locus	---	1.22365
1371382_at	similar to Filamin A (Alpha-filamin) (Filamin 1) (Endothelial actin-binding protein) (Actin-binding protein 280) (ABP-280) (Nonmuscle filamin)	LOC293860	1.22348
1389404_at	forkhead-like 18 (Drosophila) (predicted)	Fkhl18_predicted	1.22301
1397941_at	UI-R-BU0-ani-h-04-0-UI.s1 UI-R-BU0 Rattus norvegicus cDNA clone UI-R-BU0-ani-h-04-0-UI 3', mRNA sequence.	---	1.22287
1393619_at	CCR4-NOT transcription complex, subunit 6-like (predicted)	Cnot6l_predicted	1.22275
1372293_at	Transcribed locus	---	1.22249
1367632_at	glutamine synthetase 1	Glul	1.22239
1396529_at	Transcribed locus	---	1.2223
1380179_at	Transcribed locus	---	1.22226
1367687_a_at	peptidylglycine alpha-amidating monooxygenase	Pam	1.22226
1374591_at	Similar to protein tyrosine phosphatase, receptor type, D	---	1.22201
1387654_at	unconventional myosin Myr2 I heavy chain	RGD:620443	1.22197
1382194_at	Coagulation factor VIII	F8	1.22186
1384488_at	similar to cyclin-dependent kinase inhibitor 2D	Cdkn2d	1.22178
1369052_at	zinc finger protein 111	Zfp111	1.22174
1371477_at	Transcribed locus	---	1.22114
1383310_at	Protein phosphatase V	Ppp6c	1.22086
1372887_at	scavenger receptor class F, member 2 (predicted)	Scarf2_predicted	1.22068
1371755_at	Transcribed locus	---	1.22036
1393911_at	Transcribed locus	---	1.22029
1389991_at	Fas (TNFRSF6) binding factor 1 (predicted)	Fbf1_predicted	1.21951
1379330_s_at	Similar to dimerization cofactor of hepatocyte nuclear factor 1 ( HNF1) from muscle	---	1.21942
1399119_at	Similar to zinc-finger protein (LOC313144), mRNA	---	1.21889
1386435_at	transcription factor AP-4 (activating enhancer binding protein 4) (predicted)	Tfap4_predicted	1.21875
1382739_at	G protein-coupled receptor 19	Gpr19	1.21853
1372613_at	dehydrogenase/reductase (SDR family) member 6 (predicted)	Dhrs6_predicted	1.2185
1377485_at	gap junction protein, alpha 12, 47kDa	Gja12	1.2178
1377705_at	UI-R-E0-bx-f-04-0-UI.r1 UI-R-E0 Rattus norvegicus cDNA clone UI-R-E0-bx-f-04-0-UI 5', mRNA sequence.	---	1.21776
1372376_at	kinesin family member 9 (predicted)	Kif9_predicted	1.21754
1370872_at	hypothetical gene supported by Y16641 /// similar to Hnrpa3 protein /// similar to Hnrpa3 protein	LOC292273 /// LOC363971 /// LOC499592	1.2174
1370217_at	Rattus norvegicus tyrosine kinase receptor (Ptk-3) gene, complete cds.	---	1.21737
1370106_at	fibroblast growth factor 18	Fgf18	1.21716
1368703_at	enigma homolog	Enh	1.2171
1387024_at	dual specificity phosphatase 6	Dusp6	1.21705
1398913_at	nuclear mitotic apparatus protein 1 (predicted)	Numa1_predicted	1.21687
1376887_at	Similar to zinc finger protein 445	---	1.21678
1388494_at	Transcribed locus	---	1.2167
1385481_at	similar to NCAG1 (predicted)	RGD1307724_predicted	1.21644
1393036_at	Similar to Myosin-binding protein H (MyBP-H) (H-protein) (LOC310782), mRNA	---	1.21594
1396239_at	UI-R-E0-dg-g-06-0-UI.s1 UI-R-E0 Rattus norvegicus cDNA clone UI-R-E0-dg-g-06-0-UI 3', mRNA sequence.	---	1.21572
1387427_at	RAD50 homolog (S. cerevisiae)	Rad50	1.2155
1393334_at	Transcribed locus	---	1.21549
1374856_at	similar to RIKEN cDNA 4930556P03 (predicted)	RGD1306433_predicted	1.21523
1375027_at	Cell cycle progression 1 (predicted)	---	1.21512
1390445_at	Similar to Mbt domain containing 1	---	1.2148
1374486_at	Similar to hypothetical protein FLJ32884 (predicted)	---	1.21478
1388130_at	zyxin	Zyx	1.21467
1380582_at	colony stimulating factor 1 (macrophage)	Csf1	1.21432
1375767_at	similar to common-site lymphoma leukemia guanine nucleotide exchange factor like (5N754) (predicted)	RGD1308089_predicted	1.21427
1392650_at	casein kinase II, alpha 1 polypeptide	---	1.2142
1395737_at	B7 homlog 3	B7h3	1.21374
1380692_at	Transcribed sequences	---	1.21355
1392863_at	Similar to fibronectin leucine rich transmembrane protein 3	---	1.2126
1384344_at	FK506 binding protein 7 (predicted)	Fkbp7_predicted	1.21255
1391581_at	Rho GTPase activating protein 5 (predicted)	---	1.21244
1374204_at	WD repeat and SOCS box-containing 1 (predicted)	---	1.21221
1373323_at	Similar to Epidermal growth factor receptor substrate 15-like 1 (Eps15-related protein) (Eps15R) (Epidermal growth factor receptor pathway substrate 15 related sequence) (Eps15-rs)	---	1.21205
1390108_at	Similar to RIKEN cDNA 2310079N02 (LOC361443), mRNA	---	1.21185
1374111_at	similar to pinin	LOC368070	1.21183
1395361_at	Deoxyuridine triphosphatase	Dutp	1.21155
1385252_at	Tripartite motif protein 34 (predicted)	---	1.21123
1367784_a_at	clusterin	Clu	1.21093
1374688_at	Transcribed locus	---	1.21072
1390585_at	mannan-binding lectin serine peptidase 1	Masp1	1.2106
1380460_at	similar to RIKEN cDNA 4931426K16 gene (predicted)	RGD1311267_predicted	1.21028
1373471_at	ring finger protein 166	RGD:1302950	1.21018
1376082_at	ecotropic viral integration site 1 (predicted)	Evi1_predicted	1.21017
1367726_at	thyroid hormone receptor alpha	Thra	1.21009
1374784_at	phosphoribosyl transferase domain containing 1 (predicted)	Prtfdc1_predicted	1.20994
1380717_at	Transcribed sequences	---	1.20938
1388837_at	LOC363025 (LOC363025), mRNA	---	1.20933
1393655_at	RAD54 like (S. cerevisiae) (predicted)	Rad54l_predicted	1.20921
1388758_at	O-linked N-acetylglucosamine (GlcNAc) transferase (UDP-N-acetylglucosamine:polypeptide-N-acetylglucosaminyl transferase)	Ogt	1.20906
1392065_at	Transcribed sequences	---	1.20899
1374273_at	Transcribed locus	---	1.20867
1372263_at	Transcribed locus	---	1.20858
1388492_at	TNFAIP3 interacting protein 1 (predicted)	Tnip1_predicted	1.20827
1374713_at	HMT1 hnRNP methyltransferase-like 6 (S. cerevisiae) (predicted)	---	1.2082
1379737_a_at	RNA-binding region (RNP1, RRM) containing 2 (predicted)	Rnpc2_predicted	1.20799
1376800_at	Chimerin (chimaerin) 2	Chn2	1.20786
1367737_at	fucosidase, alpha-L- 1, tissue	Fuca	1.2077
1373817_at	inhibitor of growth family, member 4 (predicted)	Ing4_predicted	1.20742
1367535_at	interferon regulatory factor 2 binding protein 1 (predicted)	Irf2bp1_predicted	1.20733
1390341_at	Congenital dyserythropoietic anemia, type I (predicted)	---	1.20724
1381528_at	sialyltransferase 5	---	1.20705
1389268_at	similar to DNA polymerase lambda	LOC361767	1.207
1388650_at	topoisomerase (DNA) 2 alpha	Top2a	1.20696
1389050_at	Similar to Dual specificity protein phosphatase 3 (T-DSP11)	Dusp3	1.20676
1372752_at	transmembrane 4 superfamily member 7 (predicted) /// similar to transmembrane 4 superfamily member 7	Tm4sf7_predicted /// LOC368016	1.20633
1389628_at	phospholipase C, delta 3 (predicted)	Plcd3_predicted	1.20628
1380626_at	Transcribed sequences	---	1.20622
1379433_at	Transcribed locus	---	1.20616
1371854_at	Transcribed sequences	---	1.20611
1377782_at	Transcribed locus, weakly similar to XP_580018.1 PREDICTED: hypothetical protein XP_580018 [Rattus norvegicus]	---	1.20571
1387935_at	interleukin 3 receptor, alpha chain	Il3ra	1.20544
1389030_a_at	Rous sarcoma oncogene	Src	1.20528
1373613_at	Histone deacetylase 7	Hdac7a	1.20505
1369628_at	synaptic vesicle glycoprotein 2b	Sv2b	1.20471
1372186_a_at	topoisomerase (DNA) 2 alpha	Top2a	1.20465
1392669_at	similar to CG10084-PA (predicted)	RGD1308297_predicted	1.20446
1391849_at	Similar to MBD2 (methyl-CpG-binding protein)-interacting zinc finger protein (predicted)	---	1.20444
1372568_at	Transcribed locus	---	1.20443
1367700_at	fibromodulin	Fmod	1.20433
1373933_at	Rap guanine nucleotide exchange factor (GEF) 2 (predicted)	Rapgef2_predicted	1.20429
1397362_at	Hippyragranin	LOC257650	1.20425
1392891_at	androgen-induced proliferation inhibitor (predicted)	Aprin_predicted	1.20423
1371518_at	Nidogen (entactin)	Nid	1.2037
1374322_at	similar to MKIAA1064 protein	LOC499087	1.20344
1386966_a_at	protein kinase C-binding protein Beta15	Pkcbpb15	1.20316
1382749_at	RNA binding motif protein 5 (predicted)	Rbm5_predicted	1.20281
1390023_at	Transcribed sequence with weak similarity to protein pir:S19560 (M.musculus) S19560 proline-rich protein MP4 - mouse	---	1.20263
1371884_at	EST204360 Normalized rat lung, Bento Soares Rattus sp. cDNA clone RLUBQ62 3' end, mRNA sequence.	---	1.20258
1384233_at	Transcribed locus	---	1.20257
1369922_at	RDCR-0918-3 protein	RGD:708461	1.20224
1374150_at	Transcribed locus	---	1.20217
1376997_at	Transcribed locus	---	1.20201
1388723_at	brain and reproductive organ-expressed protein	Bre	1.20189
1393668_at	peroxisomal biogenesis factor 11c (predicted)	Pex11c_predicted	1.20187
1378506_at	Transcribed locus	---	1.20171
1383593_at	Transcribed locus	---	1.2016
1375393_at	Beta-site APP cleaving enzyme	Bace	1.20148
1390846_at	procollagen, type XVI, alpha 1 (predicted)	Col16a1_predicted	1.20137
1374216_at	Transcribed locus	---	1.20131
1373026_at	similar to RIKEN cDNA 2410030K01 (predicted)	RGD1307631_predicted	1.20119
1374429_at	Transcribed locus, weakly similar to NP_002639.1 pim-1 oncogene; Oncogene PIM1 [Homo sapiens]	---	1.20096
1387907_at	inositol 1,4,5-triphosphate receptor 1	Itpr1	1.20058
1391486_at	Transcribed locus	---	1.20058
1393803_at	caspase 8 associated protein 2 (predicted)	Casp8ap2_predicted	1.20047
1391901_at	Transcribed locus	---	1.20038
1372718_at	Transcribed sequence with weak similarity to protein pir:T13576 (D.melanogaster) T13576 hypothetical protein 52C10.5 - fruit fly	---	1.20013
1383314_at	Similar to BC003277 protein	---	-1.20012
1367955_at	RAB4B, member RAS oncogene family	Rab4b	-1.20032
1374233_at	similar to RIKEN cDNA 1810055E12 (predicted)	RGD1308326_predicted	-1.20032
1396062_at	Transcribed locus	---	-1.20033
1371617_at	proteasome (prosome, macropain) 26S subunit, non-ATPase, 13 (predicted)	Psmd13_predicted	-1.20055
1389525_at	ring finger protein 149 (predicted)	Rnf149_predicted	-1.20081
1372267_at	proteasome (prosome, macropain) 26S subunit, non-ATPase, 5 (predicted)	Psmd5_predicted	-1.20088
1369269_at	UDP-N-acetyl-alpha-D-galactosamine:polypeptide N-acetylgalactosaminyltransferase 1	Galnt1	-1.20131
1387826_at	similar to pyridoxal (pyridoxine, vitamin B6) kinase	LOC361819	-1.20131
1376862_at	ubiquitination factor E4B, UFD2 homolog (S. cerevisiae) (predicted)	Ube4b_predicted	-1.20136
1382689_at	similar to RGD1310870_predicted protein	LOC499242	-1.20194
1375521_at	transcription elongation factor A (SII)-like 8	Tceal8	-1.20229
1398879_at	similar to hypothetical protein MGC8721	RGD:1303011	-1.20234
1392337_at	Similar to hypothetical protein FLJ38348 (LOC362685), mRNA	---	-1.20237
1370828_at	zinc finger, DHHC domain containing 2	Zdhhc2	-1.20263
1367599_at	ATP synthase, H+ transporting, mitochondrial F0 complex, subunit c (subunit 9), isoform 1	Atp5g1	-1.20266
1392539_at	biliverdin reductase B (flavin reductase (NADPH)) (predicted)	Blvrb_predicted	-1.20303
1374139_at	similar to cerebellar degeneration-related 2 (predicted)	RGD1310578_predicted	-1.20347
1371475_at	ribonuclease, RNase A family 4	Rnase4	-1.20348
1374721_at	Eukaryotic translation initiation factor 2, subunit 2 beta, 38kDa	Eif2s2	-1.20375
1371104_at	sterol regulatory element binding factor 1	Srebf1	-1.20376
1382144_at	mitochondrial ribosomal protein L47 (predicted)	Mrpl47_predicted	-1.204
1370000_at	nucleobindin 2	Nucb2	-1.20446
1373749_at	syntrophin, acidic 1 (predicted)	Snta1_predicted	-1.20447
1374560_at	similar to RIKEN cDNA 1190002C06	LOC291444	-1.20483
1385243_at	V-maf musculoaponeurotic fibrosarcoma (avian) oncogene homolog (c-maf)	Maf	-1.20511
1382436_at	similar to RIKEN cDNA 2610002M06	LOC363487	-1.20517
1390990_at	Protein phosphatase 1, catalytic subunit, beta isoform	Ppp1cb	-1.2052
1371481_at	deleted in polyposis 1 (predicted)	Dp1_predicted	-1.20552
1384323_at	proteasome (prosome, macropain) 26S subunit, ATPase, 6 (predicted)	Psmc6_predicted	-1.2059
1370229_at	N-myc downstream regulated 4	Ndr4	-1.20609
1376585_at	mitochondrial ribosomal protein L50 (predicted)	Mrpl50_predicted	-1.2063
1372653_at	FK506 binding protein 11 (predicted)	Fkbp11_predicted	-1.20632
1368507_at	proteasome (prosome, macropain) subunit, alpha type 3	Psma3	-1.20664
1383227_at	Similar to RIKEN cDNA 4922503N01 (predicted)	---	-1.20709
1378568_a_at	Transcribed sequences	---	-1.20721
1377999_at	Similar to Tropomodulin 3 (predicted)	---	-1.20757
1390893_at	CDNA clone MGC:95268 IMAGE:7133962	---	-1.20811
1375280_at	CGI-146 protein	PNAS-4	-1.2084
1384315_at	pyruvate dehydrogenase kinase, isoenzyme 3	Pdk3	-1.20861
1370815_at	neurofilament, heavy polypeptide	Nefh	-1.20871
1374483_at	Transcribed locus	---	-1.20877
1384263_at	ATP-binding cassette, sub-family A (ABC1), member 13 (predicted) /// similar to hypothetical protein MGC33214 (predicted)	Abca13_predicted /// RGD1309660_predicted	-1.20879
1370295_at	expressed in non-metastatic cells 1	Nme1	-1.20891
1372655_at	Transcribed sequence with moderate similarity to protein pdb:1LBG (E. coli) B Chain B, Lactose Operon Repressor Bound To 21-Base Pair Symmetric Operator Dna, Alpha Carbons Only	---	-1.20981
1380665_at	CGI-58-like protein	LOC316122	-1.20985
1373400_at	Protein kinase, cAMP-dependent, regulatory, type 2, alpha	Prkar2a	-1.21008
1381990_at	UDP-N-acetyl-alpha-D-galactosamine:polypeptide N-acetylgalactosaminyltransferase 1	Galnt1	-1.21022
1379249_at	Similar to Wilms tumor 1-associating protein (WT1-associated protein) (Putative pre-mRNA splicing regulator female-lethal(2D) homolog)	---	-1.21024
1371576_at	mitochondrial ribosomal protein S36 (predicted)	Mrps36_predicted	-1.21035
1384757_at	similar to mKIAA1612 protein (predicted)	RGD1308848_predicted	-1.21044
1368074_at	galactose-4-epimerase, UDP	Gale	-1.21052
1372298_at	thioredoxin domain containing 4 (endoplasmic reticulum) (predicted)	Txndc4_predicted	-1.21058
1388571_at	Synaptogyrin 2	Syngr2	-1.21061
1390372_at	Mitogen activated protein kinase kinase kinase 12	Map3k12	-1.21153
1372925_at	Similar to sirtuin 3; sir2-like 3; sirtuin type 3; sirtuin (silent mating type information regulation 2, S.cerevisiae, homolog) 3; silent mating type information regulation 2, S.cerevisiae, homolog 3; mitochondrial nicotinamide aden ...	---	-1.21159
1376312_a_at	CGI-146 protein	---	-1.21166
1376758_at	inhibitor of growth family, member 1 (predicted)	Ing1_predicted	-1.21175
1388198_at	Nucleoporin like 1	Nupl1	-1.21221
1384186_at	similar to mKIAA0212 protein	LOC297504	-1.21236
1368430_at	legumain	Lgmn	-1.21297
1369294_at	bone marrow stromal cell antigen 1	Bst1	-1.21393
1371752_at	similar to Ran-interacting protein MOG1	LOC287419	-1.21499
1370305_at	Yip1 interacting factor homolog (S. cerevisiae)	Yif1	-1.21515
1395454_at	Similar to osteopetrosis associated transmembrane protein 1	---	-1.21532
1376079_at	DnaJ (Hsp40) homolog, subfamily C, member 1 (predicted)	Dnajc1_predicted	-1.2154
1373273_at	similar to hypothetical protein FLJ14936 (predicted)	RGD1311129_predicted	-1.21709
1381826_at	Transcribed sequence with moderate similarity to protein sp:P00722 (E. coli) BGAL_ECOLI Beta-galactosidase	---	-1.21719
1384903_at	glutamic pyruvate transaminase (alanine aminotransferase) 2 (predicted)	Gpt2_predicted	-1.21744
1375441_at	seryl-aminoacyl-tRNA synthetase 1	Sars1	-1.21745
1382253_at	Signal recognition particle receptor ('docking protein') (predicted)	---	-1.21834
1370176_at	amyotrophic lateral sclerosis 2 (juvenile) chromosome region, candidate 3 homolog (human)	Als2cr3	-1.21863
1369319_at	ADP-ribosylation factor-like 6 interacting protein 5	Arl6ip5	-1.21872
1369076_at	transmembrane protein 33	Tmem33	-1.2192
1372009_at	Tyrosyl-tRNA synthetase (predicted)	---	-1.21923
1371968_at	CGI-119 protein	Cgi119	-1.21924
1373037_at	ubiquitin-conjugating enzyme E2L 6 (predicted)	Ube2l6_predicted	-1.21977
1383922_a_at	similar to N-acetyltransferase ARD1	LOC363518	-1.2205
1388427_at	limitrin	1200013a08rik	-1.2206
1379186_at	Translocase of outer mitochondrial membrane 70 homolog A	TOM70	-1.22075
1367856_at	glucose-6-phosphate dehydrogenase	G6pdx	-1.22081
1373312_at	Transcribed locus	---	-1.22094
1368948_at	moesin	Msn	-1.22121
1388426_at	sterol regulatory element binding factor 1	Srebf1	-1.22125
1389615_at	similar to RIKEN cDNA 1110021N07 (predicted) /// similar to Der1-like domain family, member 1	RGD1311835_predicted /// LOC500872	-1.22125
1395606_at	UI-R-BT1-bmz-e-04-0-UI.s1 UI-R-BT1 Rattus norvegicus cDNA clone UI-R-BT1-bmz-e-04-0-UI 3', mRNA sequence.	---	-1.2213
1387793_at	ERM-binding phosphoprotein	Slc9a3r1	-1.22156
1389832_at	glutathione S-transferase omega 1	Gsto1	-1.22171
1371951_at	four and a half LIM domains 2	---	-1.22222
1383976_at	FK506 binding protein 14 (predicted)	---	-1.22236
1372277_at	Similar to intermediate filament-like protein MGC:2625 isoform 2; HOM-TES-103 tumor antigen-like (predicted)	Tas1r2	-1.22259
1374518_at	hypothetical protein LOC362011	LOC362011	-1.22261
1368083_at	cyclin H	Ccnh	-1.22338
1384950_at	phosphatidylinositol 4-kinase type-II beta	MGC94512	-1.22393
1382596_a_at	similar to hypothetical protein FLJ20254 (predicted)	RGD1311324_predicted	-1.2253
1374387_at	ADP-ribosylation factor-like 6 interacting protein 5	Arl6ip5	-1.22625
1371955_at	mitochondrial ribosomal protein L35 (predicted)	Mrpl35_predicted	-1.22635
1384252_at	similar to hypothetical protein BC015148 (predicted)	RGD1309095_predicted	-1.22652
1372476_at	fatty acid desaturase 3	Fads3	-1.22657
1373831_at	CDNA clone MGC:94133 IMAGE:7127052	---	-1.22661
1374307_at	CaM-kinase II inhibitor alpha	LOC287005	-1.22756
1370245_at	cathepsin L	Ctsl	-1.22767
1397960_at	similar to ALEX3 protein	LOC367902	-1.22871
1384295_at	heat shock protein hsp70-related protein	RGD:1303296	-1.22913
1378551_at	cytochrome P450, family 20, subfamily A, polypeptide 1	Cyp20a1	-1.22959
1369520_a_at	branched chain aminotransferase 1, cytosolic	Bcat1	-1.22987
1367705_at	glutaredoxin 1 (thioltransferase)	Glrx1	-1.22997
1368947_at	growth arrest and DNA-damage-inducible 45 alpha	Gadd45a	-1.23017
1393456_at	Transcribed locus	---	-1.23066
1389844_at	FK506 binding protein 4	Fkbp4	-1.23107
1367786_at	proteosome (prosome, macropain) subunit, beta type 8	Psmb8	-1.23182
1368470_at	gamma-glutamyl hydrolase	Ggh	-1.23182
1370476_at	associated molecule with the SH3 domain of STAM	Stambp	-1.23214
1389318_at	Dishevelled associated activator of morphogenesis 1 (predicted)	---	-1.2322
1382651_at	Transcribed locus	---	-1.23228
1375904_at	Transcribed locus	---	-1.23238
1376086_at	similar to RIKEN cDNA 1810047C23 (predicted)	RGD1311161_predicted	-1.23239
1372352_at	arginine-rich, mutated in early stage tumors (predicted)	Armet_predicted	-1.23281
1381341_at	UI-R-BJ1-avx-h-07-0-UI.s1 UI-R-BJ1 Rattus norvegicus cDNA clone UI-R-BJ1-avx-h-07-0-UI 3', mRNA sequence.	---	-1.23302
1388153_at	acyl-CoA synthetase long-chain family member 1	Acsl1	-1.23317
1392640_at	cryptochrome 1 (photolyase-like)	Cry1	-1.23387
1398660_at	Solute carrier family 35, member F2 (predicted)	---	-1.23392
1398616_at	similar to Adapter-related protein complex 1 sigma 1B subunit (Sigma-adaptin 1B) (Adaptor protein complex AP-1 sigma-1B subunit) (Golgi adaptor HA1/AP1 adaptin sigma-1B subunit) (Clathrin assembly protein complex 1 sigma-1B small chain) (Sigma 1B s...	LOC302671	-1.23438
1367686_at	ribosome associated membrane protein 4	RAMP4	-1.23515
1374004_at	similar to RIKEN cDNA D030028O16 (predicted)	RGD1310143_predicted	-1.23515
1388517_at	mitochondrial ribosomal protein L40	Mrpl40	-1.23532
1383551_at	2,3-bisphosphoglycerate mutase	Bpgm	-1.23548
1382261_at	similar to CG8841-PA (predicted)	RGD1311422_predicted	-1.23584
1370906_at	branched chain keto acid dehydrogenase E1, beta polypeptide	Bckdhb	-1.23684
1371817_at	similar to myo-inositol 1-phosphate synthase A1	LOC290651	-1.23698
1391965_at	Transcribed sequences	---	-1.23705
1373282_at	similar to CG7744-PA (predicted)	RGD1306651_predicted	-1.23706
1386970_at	eukaryotic translation initiation factor 2B, subunit 4 delta	Eif2b4	-1.23711
1387101_at	acyl-CoA synthetase long-chain family member 4	Acsl4	-1.23724
1379296_at	Transcribed locus	---	-1.23727
1368967_at	eukaryotic translation initiation factor 2B, subunit 3 gamma	Eif2b3	-1.2373
1389014_at	pre-B-cell colony enhancing factor 1	Pbef1	-1.23733
1375186_at	Transcribed sequence with moderate similarity to protein ref:NP_542788.1 (H.sapiens) chromosome 20 open reading frame 143 [Homo sapiens]	---	-1.23755
1395792_at	Transcribed locus	---	-1.23794
1391148_at	Transcribed locus	---	-1.23795
1373081_at	Brain-specific angiogenesis inhibitor 1-associated protein 2	Baiap2	-1.23818
1376584_at	Transcribed locus	---	-1.23822
1372976_at	similar to Dorz1 (predicted)	RGD1309721_predicted	-1.23843
1371818_at	Exportin, tRNA (nuclear export receptor for tRNAs) (predicted)	---	-1.2385
1374437_at	Asparaginyl-tRNA synthetase (predicted)	---	-1.23882
1395840_at	eukaryotic translation initiation factor 1A (predicted)	Eif1a_predicted	-1.23897
1370905_at	dedicator of cytokinesis 9	Dock9	-1.23897
1386985_at	glutathione S-transferase, mu 1	Gstm1	-1.23899
1388770_at	similar to RIKEN cDNA 1810045K17 (predicted)	RGD1304890_predicted	-1.24025
1375213_at	phosphoenolpyruvate carboxykinase 2 (mitochondrial) (predicted)	Pck2_predicted	-1.24031
1398429_at	hypothetical protein LOC311254	LOC311254	-1.24035
1393203_at	similar to RIKEN cDNA 2010309E21 (predicted)	RGD1304825_predicted	-1.24153
1369708_a_at	cAMP responsive element binding protein 1	Creb1	-1.24184
1371184_x_at	Tropomyosin isoform 6	Tpm3	-1.24223
1368232_at	mevalonate kinase	Mvk	-1.24228
1376848_at	Transcribed locus	---	-1.24228
1381645_at	similar to hypothetical protein (predicted)	RGD1311196_predicted	-1.24285
1371885_at	cytoskeleton-associated protein 1 (predicted)	Ckap1_predicted	-1.24287
1370690_at	heat shock protein, A (predicted)	Hspa9a_predicted	-1.24345
1383097_at	similar to RIKEN cDNA 2010012O05 (predicted)	RGD1311783_predicted	-1.24351
1383399_at	synaptic vesicle glycoprotein 2a	Sv2a	-1.24383
1373363_at	microtubule-associated protein 1b	Map1b	-1.24405
1389111_at	Transcribed locus	---	-1.24436
1374468_at	myeloid differentiation primary response gene 88	Myd88	-1.24446
1393043_at	similar to Hypothetical WD-repeat protein CGI-48 (predicted)	RGD1309957_predicted	-1.24465
1375819_at	similar to RIKEN cDNA 1200011I18 (predicted)	RGD1307254_predicted	-1.24524
1391552_at	Transcribed locus	---	-1.24531
1372142_at	arsA arsenite transporter, ATP-binding, homolog 1 (bacterial) (predicted)	Asna1_predicted	-1.2473
1393000_at	amphiphysin	---	-1.24802
1373162_at	NYGGF3	---	-1.24818
1390704_at	SDA1 domain containing 1	Sdad1	-1.24865
1367908_at	glycine cleavage system protein H (aminomethyl carrier)	Gcsh	-1.249
1379521_at	asparagine-linked glycosylation 3 homolog (yeast, alpha-1,3-mannosyltransferase) (predicted)	Alg3_predicted	-1.24981
1393427_s_at	EGF-like domain 7	Egfl7	-1.24982
1381759_at	hypothetical LOC291903	LOC291903	-1.25003
1374858_at	DEAH (Asp-Glu-Ala-His) box polypeptide 29 (predicted)	Dhx29_predicted	-1.25019
1399065_at	Transcribed sequences	---	-1.25217
1388163_at	solute carrier family 25 (mitochondrial carrier; adenine nucleotide translocator), member 5	Slc25a5	-1.25233
1390326_at	angiogenin, ribonuclease A family, member 1	Ang1	-1.25237
1388960_at	pyrophosphatase	Pp	-1.25283
1374610_at	Transcribed locus	---	-1.25311
1387048_at	nuclear RNA helicase, DECD variant of DEAD box family	Ddx39	-1.25312
1397313_at	CDNA clone MGC:93828 IMAGE:7110880	---	-1.25369
1393236_at	RIO kinase 3 (yeast) (predicted)	---	-1.2538
1397765_at	Transcribed locus	---	-1.25391
1384149_at	similar to hypothetical protein FLJ38348 (predicted)	RGD1311424_predicted	-1.25415
1393643_at	reticulocalbin (predicted)	Rcn_predicted	-1.25422
1374393_at	protein tyrosine phosphatase-like (proline instead of catalytic arginine), member b (predicted)	Ptplb_predicted	-1.25439
1367807_at	procollagen-lysine, 2-oxoglutarate 5-dioxygenase 1	Plod1	-1.25454
1375968_at	similar to Catna2 protein	LOC500214	-1.25457
1384439_at	Dimethylarginine dimethylaminohydrolase 2	Ddah2	-1.25497
1370510_a_at	aryl hydrocarbon receptor nuclear translocator-like	Arntl	-1.25501
1372177_at	molybdopterin synthase	Mocs2	-1.25522
1389446_at	small nuclear ribonucleoprotein polypeptide A' (predicted)	Snrpa1_predicted	-1.2561
1390208_at	HIV-1 Tat interactive protein 2 (predicted)	Htatip2_predicted	-1.25627
1374333_at	similar to RIKEN cDNA 1110007C09 (predicted)	RGD1306058_predicted	-1.25702
1373787_at	Solute carrier family 6 (neurotransmitter transporter, glycine), member 9	Slc6a9	-1.25734
1395370_at	germ cell-less protein	Gcl	-1.25815
1370870_at	malic enzyme 1	Me1	-1.25827
1388206_a_at	eukaryotic translation initiation factor 5	Eif5	-1.25861
1378028_at	MAD2 (mitotic arrest deficient, homolog)-like 1 (yeast) (predicted)	Mad2l1_predicted	-1.25931
1389228_at	Similar to RIKEN cDNA 2010309E21 (predicted)	---	-1.25947
1388851_at	heat shock protein, A (predicted)	Hspa9a_predicted	-1.25992
1387693_a_at	solute carrier family 6 (neurotransmitter transporter, glycine), member 9	Slc6a9	-1.26049
1371546_at	similar to TR4 orphan receptor associated protein TRA16	LOC361128	-1.26054
1383455_at	glutamyl-prolyl-tRNA synthetase (predicted)	Eprs_predicted	-1.26062
1388889_at	putative aminopeptidase Fxna	Fxna	-1.26067
1374070_at	glutathione peroxidase 2	Gpx2	-1.26074
1372704_at	similar to RIKEN cDNA 2310008M10	LOC362040	-1.26109
1397918_at	Transcribed locus, strongly similar to NP_963999.1 helicase with SNF2 domain 1 [Mus musculus]	---	-1.26222
1372297_at	glutathione S-transferase, alpha 4 (predicted)	Gsta4_predicted	-1.26246
1372966_at	hypothetical LOC298504 (predicted)	RGD1310174_predicted	-1.26376
1385133_at	UI-R-BS2-bdb-a-03-0-UI.s1 UI-R-BS2 Rattus norvegicus cDNA clone UI-R-BS2-bdb-a-03-0-UI 3', mRNA sequence.	---	-1.26387
1367729_at	ornithine aminotransferase	Oat	-1.26394
1399013_at	similar to RIKEN cDNA 2610318K02 (predicted)	RGD1310905_predicted	-1.26625
1372598_at	similar to 1190005I06Rik protein (predicted)	RGD1309651_predicted	-1.26664
1395730_at	glycyl-tRNA synthetase (predicted) /// similar to Glycyl-tRNA synthetase	Gars_predicted /// LOC500135	-1.26665
1367943_at	nuclear factor of kappa light chain gene enhancer in B-cells inhibitor, beta	Nfkbib	-1.26732
1388108_at	ELOVL family member 6, elongation of long chain fatty acids (yeast)	Elovl6	-1.26741
1384187_at	similar to Adapter-related protein complex 1 sigma 1B subunit (Sigma-adaptin 1B) (Adaptor protein complex AP-1 sigma-1B subunit) (Golgi adaptor HA1/AP1 adaptin sigma-1B subunit) (Clathrin assembly protein complex 1 sigma-1B small chain) (Sigma 1B s...	LOC302671	-1.26773
1372318_at	ELOVL family member 6, elongation of long chain fatty acids (yeast)	Elovl6	-1.26819
1374018_at	similar to ASC-1 complex subunit P100	LOC498402	-1.26914
1367702_at	acetyl-coenzyme A dehydrogenase, medium chain	Acadm	-1.26922
1381987_at	Transcribed locus	---	-1.26934
1393648_at	UI-R-CN1-cjp-p-03-0-UI.s1 UI-R-CN1 Rattus norvegicus cDNA clone UI-R-CN1-cjp-p-03-0-UI 3', mRNA sequence.	---	-1.26968
1389680_at	elongation factor RNA polymerase II 2 (predicted)	Ell2_predicted	-1.27019
1388574_at	tryptophanyl-tRNA synthetase (predicted)	Wars_predicted	-1.27032
1371484_at	Similar to RIKEN cDNA 1810009A15 (LOC293720), mRNA	---	-1.27075
1382251_at	karyopherin alpha 1 (importin alpha 5)	Kpna1	-1.27135
1370869_at	branched chain aminotransferase 1, cytosolic	Bcat1	-1.27258
1383161_a_at	EST203097 Normalized rat embryo, Bento Soares Rattus sp. cDNA clone REMBB18 3' end, mRNA sequence.	---	-1.27334
1372490_at	Transcribed locus	---	-1.27353
1390767_at	Signal sequence receptor, alpha (predicted)	Ssr1	-1.27357
1383477_at	ubiquitin carboxyl-terminal hydrolase L5 (predicted)	Uchl5_predicted	-1.27363
1382385_at	proteasome (prosome, macropain) 26S subunit, ATPase, 6 (predicted)	Psmc6_predicted	-1.2738
1369554_at	synaptogyrin 2	Syngr2	-1.27406
1372246_at	osteoclast stimulating factor 1	Ostf1	-1.2756
1370728_at	interleukin 13 receptor, alpha 1	Il13ra1	-1.27601
1371040_at	sodium-dependent neutral amino acid transporter ASCT2	Slc1a5	-1.27601
1367695_at	quinoid dihydropteridine reductase	Qdpr	-1.27611
1373043_at	Similar to SDF2 like protein 1 (LOC287936), mRNA	---	-1.27631
1373671_at	Transcribed locus	---	-1.27686
1389308_at	DnaJ (Hsp40) homolog, subfamily B, member 11 (predicted)	Dnajb11_predicted	-1.27722
1373743_at	similar to open reading frame 5 (predicted)	RGD1305062_predicted	-1.27795
1385634_at	Similar to Da1-6 (LOC307347), mRNA	---	-1.27812
1395535_at	similar to RIKEN cDNA 2810405J04 (predicted)	RGD1305486_predicted	-1.27864
1376073_at	Sel1 (suppressor of lin-12) 1 homolog (C. elegans)	Sel1h	-1.27874
1372006_at	Transcribed locus	---	-1.27899
1374058_at	similar to D7H11orf15 protein (predicted)	RGD1310775_predicted	-1.27901
1383466_at	Similar to dJ862K6.2.2 (splicing factor, arginine/serine-rich 6 (SRP55-2)(isoform 2))	---	-1.27904
1393983_at	exportin, tRNA (nuclear export receptor for tRNAs) (predicted)	Xpot_predicted	-1.27913
1388672_at	Transcribed locus	---	-1.27962
1383270_at	similar to hypothetical protein (predicted)	RGD1310571_predicted	-1.28125
1379850_at	proteasome (prosome, macropain) 26S subunit, ATPase, 6 (predicted)	Psmc6_predicted	-1.28281
1389930_at	Transcribed locus	---	-1.28332
1369986_at	hydroxyacyl glutathione hydrolase	Hagh	-1.28353
1368132_at	transducer of ERBB2, 1	Tob1	-1.28401
1371488_at	LOC499125	LOC499125	-1.28412
1373201_at	Dihydrolipoamide branched chain transacylase E2	Dbt	-1.2842
1371332_at	Transcribed locus, strongly similar to XP_545386.1 PREDICTED: similar to Histone H1.2 (H1d) [Canis familiaris]	---	-1.28554
1392983_at	proteasome 26S non-ATPase subunit 12	Psmd12	-1.28586
1386186_s_at	Transcribed sequence with moderate similarity to protein pir:S12207 (M.musculus) S12207 hypothetical protein	---	-1.2862
1379429_at	Transcribed locus	---	-1.28719
1369954_at	isocitrate dehydrogenase 1 (NADP+), soluble	Idh1	-1.2872
1394005_s_at	SRB7 (supressor of RNA polymerase B) homolog (S. cerevisiae) (predicted)	Surb7_predicted	-1.28833
1372170_at	aminoacylase 1	Acy1	-1.28849
1397557_at	general transcription factor II H, polypeptide 1 (predicted)	Gtf2h1_predicted	-1.28859
1383577_at	RAB, member of RAS oncogene family-like 3 (predicted)	---	-1.28864
1376430_at	ELAV (embryonic lethal, abnormal vision, Drosophila)-like 1 (Hu antigen R) (predicted)	---	-1.28947
1392953_at	Transcribed sequence with strong similarity to protein ref:NP_055056.2 (H.sapiens) protein tyrosine phosphatase-like, member a; proline instead of catalytic arginine [Homo sapiens]	---	-1.28956
1368144_at	regulator of G-protein signaling 2	Rgs2	-1.28968
1373928_at	similar to interleukin 17 receptor E isoform 1	Il17re	-1.29026
1380547_at	chloride channel 3	Clcn3	-1.29045
1371542_at	similar to Tubulin alpha-4 chain (Alpha-tubulin 4)	MGC94628	-1.29103
1378133_at	Transcribed locus	---	-1.29264
1388624_at	similar to Hypothetical UPF0184 protein C9orf16 homolog	LOC499780	-1.29328
1374670_at	similar to hypothetical protein MGC20700 (predicted)	RGD1307722_predicted	-1.29409
1371445_at	similar to ribosome-binding protein p34 - rat (predicted)	RGD1305092_predicted	-1.29463
1372927_at	mitochondrial ribosomal protein L50 (predicted)	Mrpl50_predicted	-1.29499
1368622_at	fructose-1,6-bisphosphatase 2	Fbp2	-1.2954
1390527_at	LOC500795	LOC500795	-1.2955
1383430_at	similar to hypothetical protein MGC2776 (predicted)	RGD1309946_predicted	-1.29631
1386900_at	ribosome associated membrane protein 4	RAMP4	-1.29633
1395881_at	Death-associated protein	Dap	-1.29701
1387361_s_at	phosphoglycerate kinase 1	Pgk1	-1.29812
1380045_at	pyruvate dehydrogenase phosphatase isoenzyme 2	Pdp2	-1.29838
1375669_at	similar to binding protein	LOC293702	-1.29867
1388832_at	dehydrogenase/reductase (SDR family) X chromosome (predicted)	Dhrsx_predicted	-1.29924
1373574_at	similar to hypothetical protein MGC40499 (predicted)	RGD1307636_predicted	-1.30078
1391549_at	Transcribed locus	---	-1.301
1376579_at	leucine aminopeptidase 3 (predicted)	Lap3_predicted	-1.30255
1388695_at	serine hydroxymethyl transferase 2 (mitochondrial) (predicted)	Shmt2_predicted	-1.3027
1393887_at	similar to choline phosphotransferase 1; cholinephosphotransferase 1 alpha; cholinephosphotransferase 1	MGC95241	-1.30273
1367617_at	aldolase A	Aldoa	-1.30386
1370942_at	RAS p21 protein activator 3	Rasa3	-1.30453
1370067_at	malic enzyme 1	Me1	-1.30454
1395744_at	Transcribed locus	---	-1.30479
1385426_at	similar to hypothetical protein FLJ20647 (predicted)	RGD1305326_predicted	-1.30486
1367773_at	solute carrier family 25, member 1	Slc25a1	-1.30522
1374777_at	hypothetical protein LOC502894	LOC502894	-1.30529
1373908_at	Transcribed locus	---	-1.30536
1372326_at	Solute carrier family 2 (facilitated glucose transporter), member 3	Slc2a3	-1.30797
1391607_at	Similar to Sestrin 2 (Hi95)	---	-1.30881
1372580_at	MAP-kinase activating death domain	Madd	-1.30901
1390226_at	similar to hypothetical protein LOC340061	LOC498840	-1.30935
1398108_at	Rho GDP dissociation inhibitor (GDI) alpha	Arhgdia	-1.3105
1368020_at	mevalonate (diphospho) decarboxylase	Mvd	-1.31064
1372607_at	nucleotide binding protein 2 (predicted)	Nubp2_predicted	-1.31113
1386994_at	B-cell translocation gene 2, anti-proliferative	Btg2	-1.31119
1375921_at	Reticulocalbin (predicted)	---	-1.31258
1377968_at	Transcribed locus	---	-1.3133
1370848_at	solute carrier family 2 (facilitated glucose transporter), member 1	Slc2a1	-1.31399
1389349_s_at	similar to interleukin 17 receptor E isoform 1	Il17re	-1.31557
1393268_at	Transcribed locus	---	-1.31648
1385428_at	exportin 4 (predicted)	Xpo4_predicted	-1.31679
1387020_at	cytochrome P450, subfamily 51	Cyp51	-1.31743
1396521_at	StAR-related lipid transfer (START) domain containing 4 (predicted)	Stard4_predicted	-1.31831
1390077_at	Translocating chain-associating membrane protein	Tram1	-1.31854
1381403_at	malic enzyme 2, NAD(+)-dependent, mitochondrial (predicted)	Me2_predicted	-1.31886
1367814_at	ATPase, Na+/K+ transporting, beta 1 polypeptide	Atp1b1	-1.31886
1382462_at	Transcribed locus	---	-1.31938
1371702_at	transmembrane 4 superfamily member 2	Tm4sf2	-1.31976
1372656_at	sorting nexin 15 (predicted)	Snx15_predicted	-1.31997
1382442_at	Similar to hypothetical protein A630014H24	---	-1.32002
1371421_at	Similar to FLJ40243 protein (predicted)	---	-1.32056
1372156_at	similar to RIKEN cDNA 1810014L12 (predicted)	RGD1307423_predicted	-1.32225
1393293_at	checkpoint with forkhead and ring finger domains (predicted)	Chfr_predicted	-1.32291
1392988_at	NAD(P) dependent steroid dehydrogenase-like	Nsdhl	-1.32319
1383162_at	EST203097 Normalized rat embryo, Bento Soares Rattus sp. cDNA clone REMBB18 3' end, mRNA sequence.	---	-1.32373
1379812_at	nicotinamide N-methyltransferase (predicted)	Nnmt_predicted	-1.32392
1390021_at	histone 1, H2bh (predicted)	Hist1h2bh_predicted	-1.32544
1386907_at	enolase 3, beta	Eno3	-1.32773
1367833_at	peptidase (prosome, macropain) 26S subunit, ATPase 5	Psmc5	-1.32819
1369473_at	phosphoglucomutase 1	Pgm1	-1.3289
1386928_at	branched chain aminotransferase 2, mitochondrial	Bcat2	-1.3296
1383519_at	Hexokinase 2	Hk2	-1.33142
1368275_at	sterol-C4-methyl oxidase-like	Sc4mol	-1.33226
1389816_at	Similar to endonuclease G (LOC362100), mRNA	---	-1.33236
1388497_at	thioesterase superfamily member 2 (predicted)	Them2_predicted	-1.33422
1372295_at	Forkhead box K2 (predicted)	---	-1.33423
1387926_at	sterol-C5-desaturase (fungal ERG3, delta-5-desaturase) homolog (S. cerevisae)	Sc5d	-1.33453
1378314_at	LOC499808	---	-1.33463
1389265_at	glucan (1,4-alpha-), branching enzyme 1 (predicted)	Gbe1_predicted	-1.33557
1370172_at	superoxide dismutase 2, mitochondrial	Sod2	-1.3364
1388634_at	phosphoglucomutase 1	Pgm1	-1.33656
1395124_at	tryptophanyl-tRNA synthetase (predicted)	Wars_predicted	-1.3371
1399111_at	similar to 101F6 protein	MGC95239	-1.33809
1374085_at	Max dimerization protein 4 (predicted)	Mxd4_predicted	-1.33812
1392144_at	Transcribed locus	---	-1.34019
1374675_at	similar to D7H11orf15 protein (predicted)	RGD1310775_predicted	-1.34058
1370073_at	protein kinase inhibitor p58	Dnajc3	-1.34176
1380500_s_at	similar to binding protein	LOC293702	-1.342
1389973_a_at	Similar to Surf-4 protein - mouse (LOC296598), mRNA	---	-1.34202
1395966_at	Similar to hypothetical protein MGC2376 (LOC308836), mRNA	---	-1.34294
1388872_at	Isopentenyl-diphosphate delta isomerase	Idi1	-1.34367
1367612_at	microsomal glutathione S-transferase 1	Mgst1	-1.34432
1374575_at	cAMP responsive element binding protein 3-like 1	Creb3l1	-1.34676
1373859_at	Transcribed locus	---	-1.34781
1377141_at	Similar to RIKEN cDNA 1110018J18	---	-1.34853
1370062_at	hypoxia induced gene 1	RGD:620215	-1.34911
1392541_at	similar to RIKEN cDNA A030007L17; EST AA673177 (predicted) /// similar to RIKEN cDNA A030007L17	RGD1304876_predicted /// LOC362370	-1.34939
1373960_at	similar to transmembrane protein induced by tumor necrosis factor alpha (predicted)	RGD1311474_predicted	-1.35044
1367932_at	3-hydroxy-3-methylglutaryl-Coenzyme A synthase 1	Hmgcs1	-1.3522
1375517_at	RGD:735085 hypothetical protein	LOC362246	-1.35278
1382571_at	Transcribed locus	---	-1.35375
1388996_at	Similar to RIKEN cDNA 3110052N05 (predicted)	---	-1.35414
1390181_at	Transcribed sequence with moderate similarity to protein sp:P00722 (E. coli) BGAL_ECOLI Beta-galactosidase	---	-1.35487
1371776_at	Phosphatidylinositol 3-kinase, regulatory subunit, polypeptide 1	Pik3r1	-1.3561
1367979_s_at	cytochrome P450, subfamily 51	Cyp51	-1.35669
1388155_at	keratin complex 1, acidic, gene 18	Krt1-18	-1.35812
1396086_at	similar to RIKEN cDNA 1810014L12 (predicted)	RGD1307423_predicted	-1.35912
1370509_at	pyruvate dehydrogenase phosphatase isoenzyme 2	Pdp2	-1.35976
1368453_at	fatty acid desaturase 2	Fads2	-1.36131
1367743_at	phosphofructokinase, liver, B-type	Pfkl	-1.36225
1380529_at	Zinc finger protein 207 (predicted)	---	-1.36462
1374906_at	similar to RIKEN cDNA 2810428C21	LOC313450	-1.36602
1374185_at	Similar to RIKEN cDNA 2810408E11 (LOC302899), mRNA	---	-1.36606
1387915_at	Ratsg2	RGD:628897	-1.36684
1384975_at	putative aminopeptidase Fxna	Fxna	-1.3677
1392516_a_at	Transcribed locus	---	-1.36778
1377875_at	Transcribed locus	---	-1.36876
1378137_at	similar to ribosome-binding protein p34 - rat (predicted)	RGD1305092_predicted	-1.36876
1372726_at	germinal histone H4 gene	Hist1h4b	-1.36895
1380269_at	FUS interacting protein (serine-arginine rich) 1 (predicted)	---	-1.36946
1384009_at	Forkhead box K2 (predicted)	---	-1.36983
1368878_at	isopentenyl-diphosphate delta isomerase	Idi1	-1.37039
1391045_at	diacylglycerol O-acyltransferase homolog 2 (mouse)	Dgat2	-1.37223
1374686_at	solute carrier family 30 (zinc transporter), member 7 (predicted)	Slc30a7_predicted	-1.37398
1383240_at	Integrin, alpha 6	Itga6	-1.37546
1372510_at	Transcribed locus	---	-1.37632
1380216_at	similar to mKIAA0981 protein	LOC316457	-1.37698
1367894_at	insulin induced gene 1	Insig1	-1.37708
1367586_at	lactate dehydrogenase A	Ldha	-1.37719
1368921_a_at	CD44 antigen	Cd44	-1.37823
1388647_at	Transcribed sequence with moderate similarity to protein ref:NP_077276.1 (H.sapiens) hypothetical protein MGC2217 [Homo sapiens]	---	-1.37964
1389297_at	ERO1-like (S. cerevisiae)	Ero1l	-1.38001
1379371_at	Transcribed locus	---	-1.38089
1389571_at	signal transducer and activator of transcription 2 (predicted)	Stat2_predicted	-1.38245
1376089_at	low density lipoprotein receptor	---	-1.38311
1383434_at	Transcribed locus	---	-1.38383
1367667_at	farensyl diphosphate synthase	Fdps	-1.38609
1367603_at	Similar to Tpi1 protein	---	-1.38643
1387074_at	regulator of G-protein signaling 2	Rgs2	-1.38763
1386073_at	CDNA clone MGC:114474 IMAGE:7455230	---	-1.38763
1367960_at	ADP-ribosylation factor-like 4	Arl4	-1.39061
1371963_at	propionyl-coenzyme A carboxylase, alpha polypeptide	---	-1.3914
1393706_at	six transmembrane epithelial antigen of the prostate (predicted)	Steap_predicted	-1.39371
1374524_at	selenocysteine lyase	Scly	-1.39378
1383443_at	similar to RIKEN cDNA 1110018J18	LOC498685	-1.39424
1370422_at	receptor-interacting serine-threonine kinase 3	Ripk3	-1.39807
1368342_at	adenosine monophosphate deaminase 3	Ampd3	-1.40167
1387925_at	asparagine synthetase	Asns	-1.4043
1377143_at	galactose transporter	RGD:727783	-1.40505
1368079_at	pyruvate dehydrogenase kinase 1	Pdk1	-1.40615
1390777_at	sterol-C5-desaturase (fungal ERG3, delta-5-desaturase) homolog (S. cerevisae)	Sc5d	-1.41067
1395248_at	similar to mKIAA0212 protein	LOC297504	-1.41268
1370817_at	Sec11-like 3 (S. cerevisiae)	Sec11l3	-1.4145
1370939_at	acyl-CoA synthetase long-chain family member 1	Acsl1	-1.42095
1368189_at	7-dehydrocholesterol reductase	Dhcr7	-1.42237
1371615_at	diacylglycerol O-acyltransferase homolog 2 (mouse)	Dgat2	-1.42263
1376813_at	gene rich cluster, C3f gene (predicted)	Grcc3f_predicted	-1.4228
1372803_at	similar to DNA segment, Chr 14, ERATO Doi 449, expressed (predicted)	RGD1305689_predicted	-1.42375
1395745_at	Transcribed locus	---	-1.42512
1367581_a_at	secreted phosphoprotein 1	Spp1	-1.42674
1377016_at	similar to RIKEN cDNA 5730592L21 (predicted)	RGD1310614_predicted	-1.42731
1370080_at	heme oxygenase (decycling) 1	Hmox1	-1.42956
1392274_at	Transcribed locus	---	-1.43747
1387376_at	aldehyde oxidase 1	Aox1	-1.44382
1398553_at	similar to CGI-100-like protein	MGC95001	-1.4458
1397248_at	Transcribed locus	---	-1.44734
1371772_at	similar to RIKEN cDNA 1810020C19 gene	LOC362169	-1.45781
1392604_at	NAD(P) dependent steroid dehydrogenase-like	Nsdhl	-1.46314
1390455_at	abhydrolase domain containing 2 (predicted)	Abhd2_predicted	-1.46662
1372132_at	CNDP dipeptidase 2 (metallopeptidase M20 family) (predicted)	Cndp2_predicted	-1.46898
1389101_at	cyclin C	---	-1.4701
1382375_at	Transcribed sequence with moderate similarity to protein pir:RGECDW (E. coli) RGECDW transcription activator of D-serine dehydratase - Escherichia coli	---	-1.47175
1394401_at	ELOVL family member 6, elongation of long chain fatty acids (yeast)	Elovl6	-1.47681
1387599_a_at	NAD(P)H dehydrogenase, quinone 1	Nqo1	-1.48161
1389430_at	Transcribed locus	---	-1.48343
1389381_at	sequestosome 1	Sqstm1	-1.48991
1387805_at	BCL2/adenovirus E1B 19 kDa-interacting protein 3	Bnip3	-1.48998
1372182_at	phosphofructokinase, platelet	Pfkp	-1.49347
1375964_at	phosphoserine phosphatase (predicted)	Psph_predicted	-1.49977
1377860_at	similar to bM410K19.2.2 (novel protein similar to extra-cellular matrix proteins and chondroitin sulfate proteoglycans, variant 2) (predicted)	RGD1306981_predicted	-1.5015
1368025_at	DNA-damage-inducible transcript 4	Ddit4	-1.5017
1390243_at	Transcribed locus	---	-1.50416
1368582_at	solute carrier family 7 (cationic amino acid transporter, y+ system), member 3	Slc7a3	-1.50668
1367857_at	fatty acid desaturase 1	Fads1	-1.51754
1372462_at	similar to acetyl CoA transferase-like	MGC95138	-1.51871
1377821_at	V-erb-b2 erythroblastic leukemia viral oncogene homolog 3 (avian)	Erbb3	-1.52367
1387233_at	hydroxysteroid (17-beta) dehydrogenase 7	Hsd17b7	-1.52852
1398625_at	Transcribed locus, strongly similar to NP_080169.1 SMAD-interacting zinc finger protein 2 [Mus musculus]	---	-1.53601
1387121_a_at	N-myc downstream regulated gene 2	Ndrg2	-1.53964
1380410_at	Transcribed locus, strongly similar to NP_071902.2 constitutive photomorphogenic protein isoform a [Homo sapiens]	---	-1.54503
1368672_at	arginase 2	Arg2	-1.54997
1386995_at	B-cell translocation gene 2, anti-proliferative	Btg2	-1.55694
1387964_a_at	ERO1-like (S. cerevisiae)	Ero1l	-1.55785
1381474_at	similar to mCHCR	LOC302492	-1.55971
1397300_at	Transcribed locus	---	-1.56224
1389797_at	Transcribed locus	---	-1.56386
1387969_at	chemokine (C-X-C motif) ligand 10	Cxcl10	-1.56807
1370821_at	Thiopurine methyltransferase	Ocln	-1.59356
1393915_at	gene rich cluster, C3f gene (predicted)	Grcc3f_predicted	-1.5958
1377114_at	EST239154 Normalized rat heart, Bento Soares Rattus sp. cDNA clone RHECZ07 3' end, mRNA sequence.	---	-1.60365
1383500_at	ribosome binding protein 1 homolog 180kDa (dog) (predicted)	Rrbp1_predicted	-1.60779
1370902_at	aldo-keto reductase family 1, member B8	Akr1b8	-1.61858
1369590_a_at	DNA-damage inducible transcript 3	Ddit3	-1.62647
1398618_s_at	Similar to hypothetical protein FLJ32743 (predicted)	---	-1.6622
1368387_at	3-hydroxybutyrate dehydrogenase (heart, mitochondrial)	Bdh	-1.67759
1370695_s_at	tribbles homolog 3 (Drosophila)	Trib3	-1.71883
1368121_at	aldo-keto reductase family 7, member A3 (aflatoxin aldehyde reductase)	Akr7a3	-1.72122
1367847_at	nuclear protein 1	Nupr1	-1.73606
1387818_at	caspase 11	Casp11	-1.78411
1372601_at	activating transcription factor 5	Atf5	-1.80943
1386321_s_at	tribbles homolog 3 (Drosophila)	Trib3	-1.98066
1383661_at	Transcribed locus	---	-2.02622
1367838_at	CTL target antigen	Cth	-2.04182
1372729_at	Protein C receptor, endothelial (predicted)	---	-2.04562
1370694_at	tribbles homolog 3 (Drosophila)	Trib3	-2.13869
1367668_a_at	stearoyl-Coenzyme A desaturase 2	Scd2	-2.20148
1385925_at	Transcribed locus, strongly similar to NP_071902.2 constitutive photomorphogenic protein isoform a [Homo sapiens]	---	-2.32384
1376845_at	putative ISG12(b) protein	isg12(b)	-2.34939
1386889_at	stearoyl-Coenzyme A desaturase 2	Scd2	-2.40125
1382314_at	interferon, alpha-inducible protein (clone IFI-15K) (predicted)	G1p2_predicted	-2.46456

## Sheet: GN5
GN5 Cells
Illumina Probe ID	Gene Title	Gene Symbol	Fold Change
ILMN_1360661	Rattus norvegicus ankyrin repeat domain 1 (cardiac muscle) (Ankrd1), mRNA.	Ankrd1	2.03245
ILMN_1361640	Rattus norvegicus latent transforming growth factor beta binding protein 2 (Ltbp2), mRNA.	Ltbp2	2.01093
ILMN_1363231	Rattus norvegicus endothelin 1 (Edn1), mRNA.	Edn1	1.99652
ILMN_1356758	Rattus norvegicus chemokine (C-X-C motif) ligand 13 (Cxcl13), mRNA.	Cxcl13	1.92861
ILMN_1366485	Rattus norvegicus similar to chromosome 1 open reading frame 63 (RGD1359529), mRNA.	RGD1359529	1.88986
ILMN_1372919	Rattus norvegicus cysteine rich protein 61 (Cyr61), mRNA.	Cyr61	1.88146
ILMN_1367348	PREDICTED: Rattus norvegicus LOC499196 (LOC499196), mRNA.	LOC499196	1.87966
ILMN_1376736	Rattus norvegicus Rho GTPase activating protein 24 (Arhgap24), mRNA.	Arhgap24	1.83994
ILMN_1350146	PREDICTED: Rattus norvegicus fibulin 2, transcript variant 2 (Fbln2), mRNA.	Fbln2	1.83719
ILMN_1367486	Rattus norvegicus dual specificity phosphatase 1 (Dusp1), mRNA.	Dusp1	1.77757
ILMN_1349272	Rattus norvegicus natriuretic peptide receptor 3 (Npr3), mRNA.	Npr3	1.76761
ILMN_1367741	PREDICTED: Rattus norvegicus MAD homolog 6 (Drosophila) (predicted) (Smad6_predicted), mRNA.	Smad6_predicted	1.7034
ILMN_1369791	PREDICTED: Rattus norvegicus similar to SERTA domain containing 4 (predicted) (RGD1565408_predicted), mRNA.	RGD1565408_predicted	1.69015
ILMN_1363251	PREDICTED: Rattus norvegicus similar to bHLH factor Math6 (predicted) (RGD1561512_predicted), mRNA.	RGD1561512_predicted	1.68314
ILMN_1353747	Rattus norvegicus follistatin (Fst), mRNA.	Fst	1.66408
ILMN_1357776	Rattus norvegicus caldesmon 1 (Cald1), mRNA.	Cald1	1.64716
ILMN_1361588	Rattus norvegicus schlafen 3 (Slfn3), mRNA.	Slfn3	1.62143
ILMN_1358820	PREDICTED: Rattus norvegicus latent transforming growth factor beta binding protein 3 (Ltbp3), mRNA.	Ltbp3	1.62038
ILMN_1367265	PREDICTED: Rattus norvegicus similar to nidogen 2 (LOC317070), mRNA.	LOC317070	1.61585
ILMN_1367103	Rattus norvegicus a disintegrin-like and metallopeptidse (reprolysin type) with thrombospondin type 1 motif, 1 (Adamts1), mRNA.	Adamts1	1.59342
ILMN_1366296	Rattus norvegicus peripherin 1 (Prph1), mRNA.	Prph1	1.57374
ILMN_1364005	Rattus norvegicus Rho family GTPase 1 (Rnd1), mRNA.	Rnd1	1.56975
ILMN_1373682	Rattus norvegicus transforming growth factor, beta 2 (Tgfb2), mRNA.	Tgfb2	1.55801
ILMN_1351925	PREDICTED: Rattus norvegicus zinc finger protein 294 (Zfp294), mRNA.	Zfp294	1.5496
ILMN_1372487	PREDICTED: Rattus norvegicus similar to chromosome 9 open reading frame 7 (predicted) (LOC296599), mRNA.	LOC296599	1.5356
ILMN_1349269	Rattus norvegicus serum/glucocorticoid regulated kinase (Sgk), mRNA.	Sgk	1.53311
ILMN_1373954	PREDICTED: Rattus norvegicus similar to colon carcinoma related protein (predicted) (RGD1560030_predicted), mRNA.	RGD1560030_predicted	1.53038
ILMN_1372371	Rattus norvegicus coagulation factor II (thrombin) receptor (F2r), mRNA.	F2r	1.52982
ILMN_1361837	Rattus norvegicus complement component 4, gene 2 (C4-2), mRNA.	C4-2	1.52896
ILMN_1369012	Rattus norvegicus monoglyceride lipase (Mgll), mRNA.	Mgll	1.52832
ILMN_1376740	Rattus norvegicus GLI pathogenesis-related 1 (glioma) (Glipr1), mRNA.	Glipr1	1.52798
ILMN_1365973	PREDICTED: Rattus norvegicus similar to protein Tyr phosphatase (LOC498331), mRNA.	LOC498331	1.51925
ILMN_1376842	Rattus norvegicus transgelin (Tagln), mRNA.	Tagln	1.51193
ILMN_1363912	PREDICTED: Rattus norvegicus tenascin N (predicted) (Tnn_predicted), mRNA.	Tnn_predicted	1.50993
ILMN_1360561	Rattus norvegicus occludin (Ocln), mRNA.	Ocln	1.50938
ILMN_1360447	Rattus norvegicus brain derived neurotrophic factor (Bdnf), mRNA.	Bdnf	1.50303
ILMN_1354948	PREDICTED: Rattus norvegicus hypothetical gene supported by NM_019371 (LOC497816), mRNA.	LOC497816	1.50154
ILMN_1365210	Rattus norvegicus glutaminase (Gls), mRNA.	Gls	1.49056
ILMN_1368331	Rattus norvegicus carbonic anhydrase 3 (Ca3), mRNA.	Ca3	1.48663
ILMN_1372721	Rattus norvegicus eukaryotic translation initiation factor 4B (Eif4b), mRNA.	Eif4b	1.48156
ILMN_1350031	Rattus norvegicus proprotein convertase subtilisin/kexin type 6 (Pcsk6), mRNA.	Pcsk6	1.47709
ILMN_1353897	PREDICTED: Rattus norvegicus phosphodiesterase 7A, transcript variant 2 (Pde7a), mRNA.	Pde7a	1.47692
ILMN_1367453	PREDICTED: Rattus norvegicus growth arrest and DNA-damage-inducible 45 gamma (Gadd45g), mRNA.	Gadd45g	1.47668
ILMN_1353346	PREDICTED: Rattus norvegicus latent transforming growth factor beta binding protein 4 (Ltbp4), mRNA.	Ltbp4	1.47116
ILMN_1376752	Rattus norvegicus nudix (nucleoside diphosphate linked moiety X)-type motif 4 (Nudt4), mRNA.	Nudt4	1.46635
ILMN_1359696	Rattus norvegicus thioredoxin interacting protein (Txnip), mRNA.	Txnip	1.46113
ILMN_1365871	Rattus norvegicus inhibitor of DNA binding 1 (Id1), mRNA.	Id1	1.46013
ILMN_1356069	PREDICTED: Rattus norvegicus CDC-like kinase 1 (Clk1), mRNA.	Clk1	1.45624
ILMN_1650532	PREDICTED: Rattus norvegicus v-myc myelocytomatosis viral related oncogene, neuroblastoma derived (avian) (Mycn), mRNA.	Mycn	1.45431
ILMN_1358593	PREDICTED: Rattus norvegicus paired related homeobox 2 (predicted) (Prrx2_predicted), mRNA.	Prrx2_predicted	1.45178
ILMN_1370470	PREDICTED: Rattus norvegicus similar to alcohol dehydrogenase PAN2 (predicted) (RGD1565196_predicted), mRNA.	RGD1565196_predicted	1.45057
ILMN_1361953	PREDICTED: Rattus norvegicus MAD homolog 7 (Drosophila) (Madh7), mRNA.	Madh7	1.45046
ILMN_1371005	PREDICTED: Rattus norvegicus cell cycle progression 1 (predicted), transcript variant 3 (Ccpg1_predicted), mRNA.	Ccpg1_predicted	1.44987
ILMN_1369810	PREDICTED: Rattus norvegicus similar to C10 (predicted) (LOC297591), mRNA.	LOC297591	1.44108
ILMN_1349413	Rattus norvegicus insulin-like growth factor 2 receptor (Igf2r), mRNA.	Igf2r	1.43381
ILMN_1371500	PREDICTED: Rattus norvegicus similar to RAB17, member RAS oncogene family (predicted) (RGD1562478_predicted), mRNA.	RGD1562478_predicted	1.43207
ILMN_1365937	PREDICTED: Rattus norvegicus LRRGT00094 (LOC498759), misc RNA.	LOC498759	1.43056
ILMN_1365135	Rattus norvegicus aspartoacylase (aminoacylase) 3 (Acy3), mRNA.	Acy3	1.42296
ILMN_1367547	PREDICTED: Rattus norvegicus similar to KIAA0377-like protein (predicted), transcript variant 4 (RGD1311552_predicted), mRNA.	RGD1311552_predicted	1.41891
ILMN_1348956	Rattus norvegicus fibronectin 1 (Fn1), mRNA.	Fn1	1.4164
ILMN_1357122	Rattus norvegicus dimethylarginine dimethylaminohydrolase 1 (Ddah1), mRNA.	Ddah1	1.41037
ILMN_1365332	Rattus norvegicus beta galactoside alpha 2,6 sialyltransferase 1 (St6gal1), mRNA.	St6gal1	1.40716
ILMN_1358233	Rattus norvegicus elastin (Eln), mRNA.	Eln	1.4062
ILMN_1352223	Rattus norvegicus adrenergic receptor, alpha 1b (Adra1b), mRNA.	Adra1b	1.40568
ILMN_1376804	Rattus norvegicus glutaminyl-tRNA synthetase (Qars), mRNA.	Qars	1.40021
ILMN_1375676	PREDICTED: Rattus norvegicus neuralized-like 2 (Drosophila) (predicted) (Neurl2_predicted), mRNA.	Neurl2_predicted	1.39891
ILMN_1362479	Rattus norvegicus hydroxy-delta-5-steroid dehydrogenase, 3 beta- and steroid delta-isomerase 7 (Hsd3b7), mRNA.	Hsd3b7	1.39839
ILMN_1357783	Rattus norvegicus heparin-binding EGF-like growth factor (Hbegf), mRNA.	Hbegf	1.39475
ILMN_1368083	Rattus norvegicus trophoblast glycoprotein (Tpbg), mRNA.	Tpbg	1.39234
ILMN_1351603	Rattus norvegicus chemokine (C-X-C motif) ligand 12 (Cxcl12), transcript variant 1, mRNA.	Cxcl12	1.38901
ILMN_1358960	PREDICTED: Rattus norvegicus cysteine-rich motor neuron 1 (predicted) (Crim1_predicted), mRNA.	Crim1_predicted	1.38771
ILMN_1360224	Rattus norvegicus similar to C21ORF7 (LOC304131), mRNA.	LOC304131	1.38701
ILMN_1353445	PREDICTED: Rattus norvegicus CTTNBP2 N-terminal like (predicted) (Cttnbp2nl_predicted), mRNA.	Cttnbp2nl_predicted	1.38513
ILMN_1363087	Rattus norvegicus RAS-like family 11 member B (Rasl11b), mRNA.	Rasl11b	1.38458
ILMN_1374967	Rattus norvegicus interferon, alpha-inducible protein 27-like (Ifi27l), mRNA.	Ifi27l	1.37654
ILMN_1356548	PREDICTED: Rattus norvegicus similar to LRRG00135 (LOC501548), mRNA.	LOC501548	1.37432
ILMN_1362834	Rattus norvegicus dual specificity phosphatase 6 (Dusp6), mRNA.	Dusp6	1.37301
ILMN_1366815	PREDICTED: Rattus norvegicus similar to Homeobox protein Hox-D8 (Hox-4.3) (Hox-5.4) (LOC366083), mRNA.	LOC366083	1.37058
ILMN_1362763	PREDICTED: Rattus norvegicus similar to Sulfide:quinone oxidoreductase, mitochondrial precursor (LOC691966), mRNA.	LOC691966	1.36866
ILMN_1355751	PREDICTED: Rattus norvegicus zinc finger protein 523 (predicted) (Zfp523_predicted), mRNA.	Zfp523_predicted	1.36632
ILMN_1374045	Rattus norvegicus glioma tumor suppressor candidate region gene 2 (Gltscr2), mRNA.	Gltscr2	1.35857
ILMN_1360197	PREDICTED: Rattus norvegicus similar to 40S ribosomal protein S26 (predicted) (RGD1565117_predicted), mRNA.	RGD1565117_predicted	1.35648
ILMN_1369107	PREDICTED: Rattus norvegicus plakophilin 2 (Pkp2), mRNA.	Pkp2	1.35616
ILMN_1357658	Rattus norvegicus WD repeat and SOCS box-containing 1 (Wsb1), transcript variant 2, mRNA.	Wsb1	1.35449
ILMN_1369848	Rattus norvegicus interleukin 10 (Il10), mRNA.	Il10	1.35448
ILMN_1373666	PREDICTED: Rattus norvegicus similar to 4631422O05Rik protein (predicted) (RGD1565927_predicted), mRNA.	RGD1565927_predicted	1.35369
ILMN_1363939	Rattus norvegicus cyclin L1 (Ccnl1), mRNA.	Ccnl1	1.35354
ILMN_1355110	Rattus norvegicus F-box and leucine-rich repeat protein 20 (Fbxl20), mRNA.	Fbxl20	1.35188
ILMN_1355243	PREDICTED: Rattus norvegicus similar to dJ1033H22.1 (KIAA0554 protein) (predicted) (LOC310839), mRNA.	LOC310839	1.35186
ILMN_1376417	Rattus norvegicus serine (or cysteine) peptidase inhibitor, clade E, member 1 (Serpine1), mRNA.	Serpine1	1.35146
ILMN_1367752	Rattus norvegicus protease, serine, 23 (Prss23), mRNA.	Prss23	1.35093
ILMN_1364718	PREDICTED: Rattus norvegicus doublesex and mab-3 related transcription factor 2 (predicted) (Dmrt2_predicted), mRNA.	Dmrt2_predicted	1.34921
ILMN_1374387	Rattus norvegicus integrin alpha 1 (Itga1), mRNA.	Itga1	1.34566
ILMN_1350336	Rattus norvegicus procollagen-proline, 2-oxoglutarate 4-dioxygenase (proline 4-hydroxylase), alpha polypeptide III (P4ha3), mRNA.	P4ha3	1.34382
ILMN_1373383	PREDICTED: Rattus norvegicus TCDD-inducible poly(ADP-ribose) polymerase (predicted) (Tiparp_predicted), mRNA.	Tiparp_predicted	1.34284
ILMN_1353643	PREDICTED: Rattus norvegicus odd-skipped related 1 (Drosophila) (predicted) (Osr1_predicted), mRNA.	Osr1_predicted	1.34127
ILMN_1355152	PREDICTED: Rattus norvegicus DEAD (Asp-Glu-Ala-Asp) box polypeptide 50, transcript variant 2 (Ddx50), mRNA.	Ddx50	1.34121
ILMN_1371120	PREDICTED: Rattus norvegicus similar to LRRG00135 (LOC501637), mRNA.	LOC501637	1.34032
ILMN_1366137	Rattus norvegicus actinin, alpha 1 (Actn1), mRNA.	Actn1	1.3401
ILMN_1356628	PREDICTED: Rattus norvegicus nuclear factor of kappa light chain gene enhancer in B-cells inhibitor, alpha (Nfkbia), mRNA.	Nfkbia	1.33903
ILMN_1375194	PREDICTED: Rattus norvegicus similar to LRRG00116 (LOC500867), mRNA.	LOC500867	1.33601
ILMN_1364633	Rattus norvegicus SH3-domain binding protein 4 (Sh3bp4), mRNA.	Sh3bp4	1.33467
ILMN_1361660	Rattus norvegicus PQ loop repeat containing 3 (Pqlc3), mRNA.	Pqlc3	1.33406
ILMN_1366848	Rattus norvegicus glycoprotein, synaptic 2 (Gpsn2), mRNA.	Gpsn2	1.33176
ILMN_1376714	Rattus norvegicus zinc finger and BTB domain containing 1 (Zbtb1), mRNA.	Zbtb1	1.33155
ILMN_1360643	Rattus norvegicus guanosine diphosphate dissociation inhibitor 1 (Gdi1), mRNA.	Gdi1	1.32918
ILMN_1350785	PREDICTED: Rattus norvegicus RNA binding motif protein 24 (predicted) (Rbm24_predicted), mRNA.	Rbm24_predicted	1.3291
ILMN_1375563	Rattus norvegicus v-maf musculoaponeurotic fibrosarcoma oncogene homolog (avian) (Maf), mRNA.	Maf	1.32874
ILMN_1361143	PREDICTED: Rattus norvegicus suppressor of variegation 4-20 homolog 2 (Drosophila) (predicted) (Suv420h2_predicted), mRNA.	Suv420h2_predicted	1.32794
ILMN_1348848	PREDICTED: Rattus norvegicus transmembrane protein with EGF-like and two follistatin-like domains 1 (Tmeff1), mRNA.	Tmeff1	1.32621
ILMN_1356454	Rattus norvegicus fibroblast growth factor receptor-like 1 (Fgfrl1), mRNA.	Fgfrl1	1.32539
ILMN_1356119	Rattus norvegicus protein kinase, interferon inducible double stranded RNA dependent activator (Prkra), mRNA.	Prkra	1.32366
ILMN_1355733	Rattus norvegicus acyl-Coenzyme A dehydrogenase, long-chain (Acadl), nuclear gene encoding mitochondrial protein, mRNA.	Acadl	1.32268
ILMN_1360660	Rattus norvegicus proviral integration site 3 (Pim3), mRNA.	Pim3	1.32011
ILMN_2040234	PREDICTED: Rattus norvegicus leprecan-like 2 (predicted) (Leprel2_predicted), mRNA.	Leprel2_predicted	1.31987
ILMN_1358442	PREDICTED: Rattus norvegicus similar to KDEL (Lys-Asp-Glu-Leu) containing 2 protein (LOC315664), mRNA.	LOC315664	1.31892
ILMN_1354695	Rattus norvegicus immunoglobulin (CD79A) binding protein 1 (Igbp1), mRNA.	Igbp1	1.3186
ILMN_1349207	Rattus norvegicus inhibitor of DNA binding 2 (Id2), mRNA.	Id2	1.31807
ILMN_1363474	Rattus norvegicus similar to hypothetical protein FLJ21827 (RGD1307682), mRNA.	RGD1307682	1.31736
ILMN_1364825	PREDICTED: Rattus norvegicus carboxypeptidase A6 (predicted) (Cpa6_predicted), mRNA.	Cpa6_predicted	1.31676
ILMN_1350278	PREDICTED: Rattus norvegicus similar to AT motif-binding factor (predicted) (RGD1560268_predicted), mRNA.	RGD1560268_predicted	1.31634
ILMN_1376575	PREDICTED: Rattus norvegicus phospholipid transfer protein (predicted) (Pltp_predicted), mRNA.	Pltp_predicted	1.31607
ILMN_1650840	PREDICTED: Rattus norvegicus cyclin L2 (predicted) (Ccnl2_predicted), mRNA.	Ccnl2_predicted	1.31506
ILMN_1374217	Rattus norvegicus SYF2 homolog, RNA splicing factor (S. cerevisiae) (Syf2), mRNA.	Syf2	1.31319
ILMN_1376339	Rattus norvegicus aryl hydrocarbon receptor (Ahr), mRNA.	Ahr	1.31273
ILMN_1371063	PREDICTED: Rattus norvegicus similar to ORF4 (LOC498048), mRNA.	LOC498048	1.31239
ILMN_1366604	Rattus norvegicus ribosomal protein L15 (Rpl15), mRNA.	Rpl15	1.31227
ILMN_1373279	PREDICTED: Rattus norvegicus similar to Ab2-008 (RGD1305133), mRNA.	RGD1305133	1.31156
ILMN_1374960	Rattus norvegicus family with sequence similarity 26, member B (Fam26b), mRNA.	Fam26b	1.31094
ILMN_2040378	Rattus norvegicus Axl receptor tyrosine kinase (Axl), transcript variant 2, mRNA.	Axl	1.31016
ILMN_1367985	Rattus norvegicus neuropilin 1 (Nrp1), mRNA.	Nrp1	1.30935
ILMN_1360936	PREDICTED: Rattus norvegicus microrchidia 3 (predicted) (Morc3_predicted), mRNA.	Morc3_predicted	1.30919
ILMN_1376388	Rattus norvegicus caveolin, caveolae protein 1 (Cav1), transcript variant 2, mRNA.	Cav1	1.30908
ILMN_1368469	PREDICTED: Rattus norvegicus DEAD/H (Asp-Glu-Ala-Asp/His) box polypeptide 20, 103kD (Ddx20), mRNA.	Ddx20	1.30736
ILMN_1355605	Rattus norvegicus vitamin K epoxide reductase complex, subunit 1 (Vkorc1), mRNA.	Vkorc1	1.30599
ILMN_1376361	Rattus norvegicus T-cell immunomodulatory protein (Cda08), mRNA.	Cda08	1.30597
ILMN_1367452	Rattus norvegicus mitochondrial carrier triple repeat 1 (Mcart1), nuclear gene encoding mitochondrial protein, mRNA.	Mcart1	1.30593
ILMN_1365444	Rattus norvegicus Cd200 antigen (Cd200), mRNA.	Cd200	1.30567
ILMN_1370045	Rattus norvegicus trafficking protein particle complex 2 (Trappc2), mRNA.	Trappc2	1.30562
ILMN_1367033	Rattus norvegicus four and a half LIM domains 1 (Fhl1), transcript variant 2, mRNA.	Fhl1	1.30343
ILMN_1355835	PREDICTED: Rattus norvegicus laminin, gamma 1 (Lamc1), mRNA.	Lamc1	1.29979
ILMN_1356427	Rattus norvegicus A kinase (PRKA) anchor protein 5 (Akap5), mRNA.	Akap5	1.29932
ILMN_1356239	PREDICTED: Rattus norvegicus similar to Myoferlin (Fer-1 like protein 3) (predicted) (RGD1564216_predicted), mRNA.	RGD1564216_predicted	1.29894
ILMN_1359195	PREDICTED: Rattus norvegicus ribonuclease T2 (predicted) (Rnaset2_predicted), mRNA.	Rnaset2_predicted	1.29825
ILMN_1359642	Rattus norvegicus UDP-N-acetyl-alpha-D-galactosamine:polypeptide N-acetylgalactosaminyltransferase 11 (Galnt11), mRNA.	Galnt11	1.29775
ILMN_1357031	PREDICTED: Rattus norvegicus similar to RIKEN cDNA D130059P03 gene (predicted) (RGD1310722_predicted), mRNA.	RGD1310722_predicted	1.29744
ILMN_1360680	Rattus norvegicus insulin receptor substrate 1 (Irs1), mRNA.	Irs1	1.29587
ILMN_1376635	Rattus norvegicus cytochrome P450, family 1, subfamily b, polypeptide 1 (Cyp1b1), mRNA.	Cyp1b1	1.29489
ILMN_1355694	PREDICTED: Rattus norvegicus similar to Ac1262 (LOC363492), mRNA.	LOC363492	1.2944
ILMN_1376442	Rattus norvegicus neural precursor cell expressed, developmentally down-regulated gene 9 (Nedd9), mRNA.	Nedd9	1.2938
ILMN_1363886	Rattus norvegicus similar to 1300014I06Rik protein (RGD1311307), mRNA.	RGD1311307	1.29235
ILMN_1375135	PREDICTED: Rattus norvegicus cytidine 5'-triphosphate synthase (predicted) (Ctps_predicted), mRNA.	Ctps_predicted	1.29226
ILMN_1355376	PREDICTED: Rattus norvegicus excision repair cross-complementing rodent repair deficiency, complementation group 5 (mapped) (Ercc5_mapped), mRNA.	Ercc5_mapped	1.29105
ILMN_1355679	Rattus norvegicus intraflagellar transport 81 homolog (Chlamydomonas) (Ift81), mRNA.	Ift81	1.29025
ILMN_1351917	Rattus norvegicus matrix Gla protein (Mgp), mRNA.	Mgp	1.29023
ILMN_1373649	Rattus norvegicus serine protease inhibitor, Kunitz type 2 (Spint2), transcript variant 2, mRNA.	Spint2	1.28929
ILMN_1357538	Rattus norvegicus lysosomal membrane glycoprotein 1 (Lamp1), mRNA.	Lamp1	1.28822
ILMN_1369102	PREDICTED: Rattus norvegicus protein kinase, cAMP dependent, catalytic, beta (predicted) (Prkacb_predicted), mRNA.	Prkacb_predicted	1.28804
ILMN_1651132	Rattus norvegicus kelch-like 24 (Drosophila) (Klhl24), mRNA.	Klhl24	1.28798
ILMN_1374926	Rattus norvegicus activin receptor IIB (Acvr2b), mRNA.	Acvr2b	1.28768
ILMN_1356203	Rattus norvegicus adrenomedullin (Adm), mRNA.	Adm	1.28694
ILMN_1370468	PREDICTED: Rattus norvegicus similar to RIKEN cDNA 2310010M24 (predicted) (RGD1562767_predicted), mRNA.	RGD1562767_predicted	1.2862
ILMN_1359800	PREDICTED: Rattus norvegicus LIM and cysteine-rich domains 1 (predicted) (Lmcd1_predicted), mRNA.	Lmcd1_predicted	1.2857
ILMN_1365843	PREDICTED: Rattus norvegicus similar to DNA-directed RNA polymerase II 23 kDa polypeptide (RPB25) (RPB5) (RPABC1) (LOC687055), mRNA.	LOC687055	1.28453
ILMN_1368086	Rattus norvegicus insulin-like growth factor binding protein 7 (Igfbp7), mRNA.	Igfbp7	1.2845
ILMN_1352338	Rattus norvegicus discoidin domain receptor family, member 1 (Ddr1), mRNA.	Ddr1	1.28418
ILMN_1352087	PREDICTED: Rattus norvegicus poly A binding protein, cytoplasmic 2 (predicted) (Pabpc2_predicted), mRNA.	Pabpc2_predicted	1.28418
ILMN_1369149	PREDICTED: Rattus norvegicus similar to Zinc finger, FYVE domain containing 16 (predicted) (RGD1564784_predicted), mRNA.	RGD1564784_predicted	1.28411
ILMN_1353590	Rattus norvegicus growth arrest and DNA-damage-inducible 45 beta (Gadd45b), mRNA.	Gadd45b	1.28408
ILMN_1649832	PREDICTED: Rattus norvegicus lysophospholipase-like 1 (predicted) (Lyplal1_predicted), mRNA.	Lyplal1_predicted	1.28375
ILMN_1650649	PREDICTED: Rattus norvegicus similar to mKIAA0716 protein (LOC366608), mRNA.	LOC366608	1.28337
ILMN_1356637	Rattus norvegicus Ras homolog enriched in brain like 1 (Rhebl1), mRNA.	Rhebl1	1.2825
ILMN_1373182	PREDICTED: Rattus norvegicus large tumor suppressor 2 (predicted) (Lats2_predicted), mRNA.	Lats2_predicted	1.28141
ILMN_1366782	Rattus norvegicus Kallmann syndrome 1 (Kal1), mRNA.	Kal1	1.28138
ILMN_1369444	PREDICTED: Rattus norvegicus similar to ORF4 (LOC361942), mRNA.	LOC361942	1.28057
ILMN_1363528	PREDICTED: Rattus norvegicus similar to YLP motif containing protein 1 (Nuclear protein ZAP3) (ZAP113) (predicted) (RGD1564946_predicted), mRNA.	RGD1564946_predicted	1.27901
ILMN_1359211	PREDICTED: Rattus norvegicus laminin, alpha 5 (Lama5), mRNA.	Lama5	1.27898
ILMN_1362561	PREDICTED: Rattus norvegicus similar to LRRGT00176 (LOC498378), mRNA.	LOC498378	1.27832
ILMN_1354667	PREDICTED: Rattus norvegicus hypothetical gene supported by NM_031623 (LOC497769), mRNA.	LOC497769	1.27811
ILMN_1360255	PREDICTED: Rattus norvegicus similar to Aig1 protein (predicted) (RGD1562920_predicted), mRNA.	RGD1562920_predicted	1.27763
ILMN_1371898	PREDICTED: Rattus norvegicus similar to retinoblastoma-associated factor 600 (RBAF600) (LOC313658), mRNA.	LOC313658	1.27575
ILMN_1354592	PREDICTED: Rattus norvegicus carbohydrate (chondroitin) synthase 1 (predicted) (Chsy1_predicted), mRNA.	Chsy1_predicted	1.27562
ILMN_1355648	PREDICTED: Rattus norvegicus xeroderma pigmentosum, complementation group A (predicted) (Xpa_predicted), mRNA.	Xpa_predicted	1.27479
ILMN_1361015	PREDICTED: Rattus norvegicus similar to transmembrane protein TM9SF3 (LOC309475), mRNA.	LOC309475	1.27253
ILMN_1350385	Rattus norvegicus transmembrane protein 150 (Tmem150), mRNA.	Tmem150	1.27168
ILMN_1358074	Rattus norvegicus neural proliferation, differentiation and control, 1 (Npdc1), mRNA.	Npdc1	1.27161
ILMN_1357786	PREDICTED: Rattus norvegicus putative homeodomain transcription factor 1 (Phtf1), mRNA.	Phtf1	1.27075
ILMN_1352204	PREDICTED: Rattus norvegicus similar to Golgi phosphoprotein 2 (Golgi membrane protein GP73), transcript variant 2 (LOC682869), mRNA.	LOC682869	1.27065
ILMN_1356777	PREDICTED: Rattus norvegicus similar to Ac1147 (predicted) (RGD1561229_predicted), mRNA.	RGD1561229_predicted	1.26896
ILMN_1355383	Rattus norvegicus disabled homolog 2, mitogen-responsive phosphoprotein (Drosophila) (Dab2), mRNA.	Dab2	1.26763
ILMN_1355505	PREDICTED: Rattus norvegicus podocalyxin-like 2 (predicted) (Podxl2_predicted), mRNA.	Podxl2_predicted	1.26646
ILMN_1352928	Rattus norvegicus acid phosphatase-like 2 (Acpl2), mRNA.	Acpl2	1.26645
ILMN_1357766	PREDICTED: Rattus norvegicus kelch-like 9 (Drosophila) (predicted) (Klhl9_predicted), mRNA.	Klhl9_predicted	1.26644
ILMN_1357805	PREDICTED: Rattus norvegicus similar to RIKEN cDNA A030009H04 (predicted) (RGD1563441_predicted), mRNA.	RGD1563441_predicted	1.26565
ILMN_1374103	Rattus norvegicus protein tyrosine phosphatase, receptor type, D (Ptprd), mRNA.	Ptprd	1.2656
ILMN_1369374	Rattus norvegicus interleukin 1 receptor-like 1 (Il1rl1), mRNA.	Il1rl1	1.26559
ILMN_1350355	PREDICTED: Rattus norvegicus similar to PABP-dependent poly(A) nuclease 3 (LOC360760), mRNA.	LOC360760	1.26532
ILMN_1371437	PREDICTED: Rattus norvegicus LUC7-like (S. cerevisiae) (predicted) (Luc7l_predicted), mRNA.	Luc7l_predicted	1.2649
ILMN_1368158	PREDICTED: Rattus norvegicus similar to RIKEN cDNA 1110003E01 (predicted) (RGD1560592_predicted), mRNA.	RGD1560592_predicted	1.26472
ILMN_1362140	Rattus norvegicus adaptor-related protein complex AP-4, mu 1 (Ap4m1), mRNA.	Ap4m1	1.26423
ILMN_1369730	PREDICTED: Rattus norvegicus SID1 transmembrane family, member 2 (predicted) (Sidt2_predicted), mRNA.	Sidt2_predicted	1.26363
ILMN_1353161	Rattus norvegicus ATP synthase, H+ transporting, mitochondrial F0 complex, subunit c (subunit 9), isoform 2 (Atp5g2), mRNA.	Atp5g2	1.26296
ILMN_2040238	PREDICTED: Rattus norvegicus similar to 4930438D12Rik protein (predicted) (RGD1563224_predicted), mRNA.	RGD1563224_predicted	1.26264
ILMN_1376581	Rattus norvegicus eukaryotic translation initiation factor 3, subunit E (Eif3e), mRNA.	Eif3e	1.2621
ILMN_1361515	Rattus norvegicus myosin phosphatase-Rho interacting protein (M-rip), transcript variant 2, mRNA.	M-rip	1.26149
ILMN_1355322	PREDICTED: Rattus norvegicus zinc finger protein, multitype 2 (predicted) (Zfpm2_predicted), mRNA.	Zfpm2_predicted	1.26119
ILMN_1367426	PREDICTED: Rattus norvegicus LOC499812 (LOC499812), mRNA.	LOC499812	1.26116
ILMN_1355332	Rattus norvegicus eukaryotic translation initiation factor 3, subunit H (Eif3h), mRNA.	Eif3h	1.26115
ILMN_1361017	PREDICTED: Rattus norvegicus similar to LRRGT00082 (LOC500398), mRNA.	LOC500398	1.26068
ILMN_1374873	PREDICTED: Rattus norvegicus similar to RIKEN cDNA 2810489O06 (predicted) (RGD1560177_predicted), mRNA.	RGD1560177_predicted	1.26054
ILMN_1356465	PREDICTED: Rattus norvegicus transcription factor AP-2, alpha (predicted) (Tcfap2a_predicted), mRNA.	Tcfap2a_predicted	1.26047
ILMN_1354609	Rattus norvegicus similar to RIKEN cDNA 1200009B18; EST AA408438 (RGD1310606), mRNA.	RGD1310606	1.25964
ILMN_1364421	PREDICTED: Rattus norvegicus mitochondrial carrier triple repeat 2 (predicted) (Mcart2_predicted), mRNA.	Mcart2_predicted	1.25857
ILMN_1370962	PREDICTED: Rattus norvegicus kinesin family member 9 (predicted) (Kif9_predicted), mRNA.	Kif9_predicted	1.25814
ILMN_1363012	PREDICTED: Rattus norvegicus RAD52 motif 1 (predicted) (Rdm1_predicted), mRNA.	Rdm1_predicted	1.25742
ILMN_1350515	PREDICTED: Rattus norvegicus similar to hypothetical protein B230399E16 (predicted) (RGD1559694_predicted), mRNA.	RGD1559694_predicted	1.25646
ILMN_1367049	Rattus norvegicus phytanoyl-CoA dioxygenase domain containing 1 (Phyhd1), mRNA.	Phyhd1	1.25635
ILMN_1352975	Rattus norvegicus alpha-2-macroglobulin (A2m), mRNA.	A2m	1.25441
ILMN_1362786	PREDICTED: Rattus norvegicus cold autoinflammatory syndrome 1 homolog (human) (predicted) (Cias1_predicted), mRNA.	Cias1_predicted	1.25433
ILMN_1359503	Rattus norvegicus cyclin D-type binding-protein 1 (Ccndbp1), mRNA.	Ccndbp1	1.25427
ILMN_1359735	PREDICTED: Rattus norvegicus U1 small nuclear ribonucleoprotein polypeptide A (predicted) (Snrp70_predicted), mRNA.	Snrp70_predicted	1.25417
ILMN_1372765	Rattus norvegicus N-acetyltransferase 1 (arylamine N-acetyltransferase) (Nat1), mRNA.	Nat1	1.25377
ILMN_1349390	PREDICTED: Rattus norvegicus RNA binding motif protein 4 (predicted) (Rbm4_predicted), mRNA.	Rbm4_predicted	1.25339
ILMN_1360736	Rattus norvegicus UDP-glucose dehydrogenase (Ugdh), mRNA.	Ugdh	1.25249
ILMN_1354723	Rattus norvegicus cytidine monophospho-N-acetylneuraminic acid hydroxylase (Cmah), mRNA.	Cmah	1.25178
ILMN_1361968	PREDICTED: Rattus norvegicus similar to S-adenosylmethionine synthetase gamma form (Methionine adenosyltransferase) (predicted) (RGD1560523_predicted), mRNA.	RGD1560523_predicted	1.25148
ILMN_1348930	PREDICTED: Rattus norvegicus similar to KIAA1217 (predicted) (RGD1563437_predicted), mRNA.	RGD1563437_predicted	1.25143
ILMN_1360586	Rattus norvegicus latrophilin 1 (Lphn1), mRNA.	Lphn1	1.25113
ILMN_1350250	Rattus norvegicus sterol O-acyltransferase 1 (Soat1), mRNA.	Soat1	1.25078
ILMN_1350770	Rattus norvegicus sodium channel, voltage-gated, type III, beta (Scn3b), mRNA.	Scn3b	1.25006
ILMN_1376363	Rattus norvegicus Cnksr family member 3 (Cnksr3), mRNA.	Cnksr3	1.25004
ILMN_1651025	PREDICTED: Rattus norvegicus solute carrier family 25 (mitochondrial carrier, peroxisomal membrane protein), member 17 (predicted) (Slc25a17_predicted), mRNA.	Slc25a17_predicted	1.24929
ILMN_1375050	PREDICTED: Rattus norvegicus paternally expressed 12 (predicted) (Peg12_predicted), mRNA.	Peg12_predicted	1.24855
ILMN_1358432	PREDICTED: Rattus norvegicus cyclin E2 (predicted), transcript variant 2 (Ccne2_predicted), mRNA.	Ccne2_predicted	1.24852
ILMN_1369965	Rattus norvegicus myosin, heavy polypeptide 9, non-muscle (Myh9), mRNA.	Myh9	1.24685
ILMN_1348907	Rattus norvegicus sulfatase 1 (Sulf1), mRNA.	Sulf1	1.24681
ILMN_1365384	PREDICTED: Rattus norvegicus similar to ribosomal protein L10 (predicted) (RGD1563861_predicted), mRNA.	RGD1563861_predicted	1.24599
ILMN_1362266	Rattus norvegicus extracellular matrix protein 1 (Ecm1), mRNA.	Ecm1	1.24578
ILMN_1361777	Rattus norvegicus mannosidase 2, alpha B1 (Man2b1), mRNA.	Man2b1	1.24551
ILMN_1354357	PREDICTED: Rattus norvegicus jumonji domain containing 1C (Jmjd1c), mRNA.	Jmjd1c	1.24483
ILMN_1372614	Rattus norvegicus neurocalcin delta (Ncald), mRNA.	Ncald	1.24458
ILMN_1370641	PREDICTED: Rattus norvegicus LOC499620 (LOC499620), mRNA.	LOC499620	1.2445
ILMN_1359269	PREDICTED: Rattus norvegicus cordon-bleu (predicted) (Cobl_predicted), mRNA.	Cobl_predicted	1.24442
ILMN_1376869	Rattus norvegicus ubiquitin specific peptidase 19 (Usp19), mRNA.	Usp19	1.24435
ILMN_1350803	PREDICTED: Rattus norvegicus similar to LRRGT00176 (LOC498623), mRNA.	LOC498623	1.2442
ILMN_1376269	Rattus norvegicus zinc finger protein 513 (Zfp513), mRNA.	Zfp513	1.24378
ILMN_1354381	PREDICTED: Rattus norvegicus similar to 60S ribosomal protein L7a (LOC367835), mRNA.	LOC367835	1.2431
ILMN_1349829	Rattus norvegicus v-maf musculoaponeurotic fibrosarcoma oncogene family, protein K (avian) (Mafk), mRNA.	Mafk	1.2423
ILMN_1368460	PREDICTED: Rattus norvegicus hypothetical gene supported by NM_031819 (LOC497706), mRNA.	LOC497706	1.24216
ILMN_1356793	Rattus norvegicus coagulation factor III (F3), mRNA.	F3	1.24148
ILMN_1363645	PREDICTED: Rattus norvegicus similar to RIKEN cDNA 4930556P03 (predicted) (RGD1306433_predicted), mRNA.	RGD1306433_predicted	1.24077
ILMN_1357093	Rattus norvegicus tropomyosin 4 (Tpm4), mRNA.	Tpm4	1.24003
ILMN_1356258	Rattus norvegicus myosin IXb (Myo9b), mRNA.	Myo9b	1.23999
ILMN_1370362	PREDICTED: Rattus norvegicus myelin basic protein expression factor 2, repressor (Myef2), mRNA.	Myef2	1.23838
ILMN_1354677	PREDICTED: Rattus norvegicus 5'-nucleotidase, cytosolic II (predicted) (Nt5c2_predicted), mRNA.	Nt5c2_predicted	1.23807
ILMN_1355719	PREDICTED: Rattus norvegicus ischemia related factor NYW-1 (Nyw1), mRNA.	Nyw1	1.2377
ILMN_1352414	Rattus norvegicus transforming growth factor, beta 3 (Tgfb3), mRNA.	Tgfb3	1.23736
ILMN_1357973	PREDICTED: Rattus norvegicus similar to ORF2 consensus sequence encoding endonuclease and reverse transcriptase minus RNaseH (LOC500829), mRNA.	LOC500829	1.23735
ILMN_1372395	PREDICTED: Rattus norvegicus similar to RIKEN cDNA D430044G18 (RGD1309038), mRNA.	RGD1309038	1.23706
ILMN_1353885	Rattus norvegicus zinc finger protein 219 (Zfp219), mRNA.	Zfp219	1.23675
ILMN_1361391	PREDICTED: Rattus norvegicus protein tyrosine phosphatase alpha (LOC360370), mRNA.	LOC360370	1.23667
ILMN_1351816	PREDICTED: Rattus norvegicus Rab6 interacting protein 1 (predicted) (Rab6ip1_predicted), mRNA.	Rab6ip1_predicted	1.23483
ILMN_1358314	Rattus norvegicus leucine zipper protein 1 (Luzp1), mRNA.	Luzp1	1.23438
ILMN_1373397	PREDICTED: Rattus norvegicus Eph receptor A2 (predicted) (Epha2_predicted), mRNA.	Epha2_predicted	1.23418
ILMN_1349114	Rattus norvegicus serine (or cysteine) peptidase inhibitor, clade B, member 6a (Serpinb6a), mRNA.	Serpinb6a	1.2336
ILMN_1370179	PREDICTED: Rattus norvegicus eukaryotic translation initiation factor 3, subunit 5 (epsilon) (predicted) (Eif3s5_predicted), mRNA.	Eif3s5_predicted	1.23327
ILMN_1349139	PREDICTED: Rattus norvegicus similar to CG9996-PA (LOC686935), mRNA.	LOC686935	1.23324
ILMN_1369569	Rattus norvegicus leucine rich repeat containing 14 (Lrrc14), mRNA.	Lrrc14	1.23297
ILMN_1359228	PREDICTED: Rattus norvegicus similar to hypothetical protein (predicted) (RGD1562123_predicted), mRNA.	RGD1562123_predicted	1.2324
ILMN_1371266	PREDICTED: Rattus norvegicus methionyl aminopeptidase 1 (predicted) (Metap1_predicted), mRNA.	Metap1_predicted	1.23158
ILMN_1355047	PREDICTED: Rattus norvegicus hypothetical protein LOC686361 (LOC686361), mRNA.	LOC686361	1.23138
ILMN_1371229	PREDICTED: Rattus norvegicus ataxin 2 (predicted) (Atxn2_predicted), mRNA.	Atxn2_predicted	1.23136
ILMN_1363607	Rattus norvegicus PAS domain containing serine/threonine kinase (Pask), mRNA.	Pask	1.23114
ILMN_1368366	PREDICTED: Rattus norvegicus SWI/SNF related, matrix associated, actin dependent regulator of chromatin, subfamily a, member 5 (predicted) (Smarca5_predicted), mRNA.	Smarca5_predicted	1.22927
ILMN_1649855	PREDICTED: Rattus norvegicus similar to RIKEN cDNA 2010315L10 (predicted) (RGD1306660_predicted), mRNA.	RGD1306660_predicted	1.22834
ILMN_1364451	PREDICTED: Rattus norvegicus Rho GTPase activating protein 21 (predicted) (Arhgap21_predicted), mRNA.	Arhgap21_predicted	1.22806
ILMN_1376462	Rattus norvegicus fragile X mental retardation, autosomal homolog 1 (Fxr1), mRNA.	Fxr1	1.22784
ILMN_1359090	PREDICTED: Rattus norvegicus similar to zinc finger protein 198 (LOC305913), mRNA.	LOC305913	1.22768
ILMN_1370257	Rattus norvegicus meningioma expressed antigen 5 (hyaluronidase) (Mgea5), mRNA.	Mgea5	1.22735
ILMN_1362443	PREDICTED: Rattus norvegicus hypothetical gene supported by NM_019331 (LOC497733), mRNA.	LOC497733	1.22729
ILMN_1375082	PREDICTED: Rattus norvegicus sirtuin (silent mating type information regulation 2 homolog) 4 (S. cerevisiae) (predicted) (Sirt4_predicted), mRNA.	Sirt4_predicted	1.22729
ILMN_1376466	PREDICTED: Rattus norvegicus cut-like 1 (Drosophila) (Cutl1), mRNA.	Cutl1	1.22681
ILMN_1374536	Rattus norvegicus SH2B adaptor protein 2 (Sh2b2), mRNA.	Sh2b2	1.22652
ILMN_1374105	Rattus norvegicus adiponectin receptor 1 (Adipor1), mRNA.	Adipor1	1.22641
ILMN_1376332	Rattus norvegicus disrupted in renal carcinoma 2 (Dirc2), mRNA.	Dirc2	1.22637
ILMN_1354658	Rattus norvegicus RIB43A domain with coiled-coils 1 (Ribc1), mRNA.	Ribc1	1.22601
ILMN_1372932	PREDICTED: Rattus norvegicus LOC500504 (LOC500504), mRNA.	LOC500504	1.22599
ILMN_1352574	PREDICTED: Rattus norvegicus COMM domain containing 4 (predicted) (Commd4_predicted), mRNA.	Commd4_predicted	1.22595
ILMN_1370146	PREDICTED: Rattus norvegicus similar to CDNA sequence BC022692 (predicted) (RGD1561555_predicted), mRNA.	RGD1561555_predicted	1.22542
ILMN_1371560	PREDICTED: Rattus norvegicus similar to chromosome 11 open reading frame2 (predicted), transcript variant 1 (RGD1560544_predicted), mRNA.	RGD1560544_predicted	1.22513
ILMN_1359605	Rattus norvegicus CBF1 interacting corepressor (Cir), mRNA.	Cir	1.22498
ILMN_1355708	PREDICTED: Rattus norvegicus PFTAIRE protein kinase 1 (predicted) (Pftk1_predicted), mRNA.	Pftk1_predicted	1.22495
ILMN_1375096	Rattus norvegicus transmembrane protein 123 (Tmem123), mRNA.	Tmem123	1.22479
ILMN_1372551	PREDICTED: Rattus norvegicus inositol hexaphosphate kinase 2 (Ihpk2), mRNA.	Ihpk2	1.22438
ILMN_1365255	Rattus norvegicus ectonucleotide pyrophosphatase/phosphodiesterase 1 (Enpp1), mRNA.	Enpp1	1.22312
ILMN_1363103	PREDICTED: Rattus norvegicus membrane-spanning 4-domains, subfamily A, member 8B (predicted) (Ms4a8b_predicted), mRNA.	Ms4a8b_predicted	1.22298
ILMN_1365857	PREDICTED: Rattus norvegicus suppressor of variegation 4-20 homolog 1 (Drosophila) (predicted) (Suv420h1_predicted), mRNA.	Suv420h1_predicted	1.22251
ILMN_1354187	Rattus norvegicus lanC (bacterial lantibiotic synthetase component C)-like 1 (Lancl1), mRNA.	Lancl1	1.22231
ILMN_1358399	PREDICTED: Rattus norvegicus similar to small EDRK-rich factor 1 (predicted) (RGD1565105_predicted), mRNA.	RGD1565105_predicted	1.22221
ILMN_1376291	Rattus norvegicus RecQ protein-like (Recql), mRNA.	Recql	1.22186
ILMN_1364972	Rattus norvegicus angiotensin II receptor, type 1 (AT1A) (Agtr1a), mRNA.	Agtr1a	1.22138
ILMN_1364359	Rattus norvegicus leptin receptor overlapping transcript (Leprot), mRNA.	Leprot	1.22065
ILMN_1368181	Rattus norvegicus nicotinate phosphoribosyltransferase domain containing 1 (Naprt1), mRNA.	Naprt1	1.22045
ILMN_1368533	PREDICTED: Rattus norvegicus similar to 60S ribosomal protein L7a (predicted) (RGD1564423_predicted), mRNA.	RGD1564423_predicted	1.22019
ILMN_1358477	Rattus norvegicus phosducin-like (Pdcl), mRNA.	Pdcl	1.22006
ILMN_1362012	PREDICTED: Rattus norvegicus fibronectin type III domain containing 3B (predicted) (Fndc3b_predicted), mRNA.	Fndc3b_predicted	1.21941
ILMN_1370811	PREDICTED: Rattus norvegicus TM2 domain containing 1 (predicted) (Tm2d1_predicted), mRNA.	Tm2d1_predicted	1.2193
ILMN_1348815	PREDICTED: Rattus norvegicus similar to suppressor of hairy wing homolog 4 isoform 1 (predicted) (RGD1560796_predicted), mRNA.	RGD1560796_predicted	1.21927
ILMN_1367511	Rattus norvegicus latrophilin 2 (Lphn2), mRNA.	Lphn2	1.21917
ILMN_1357388	Rattus norvegicus zinc finger protein 260 (Zfp260), mRNA.	Zfp260	1.21915
ILMN_1349675	PREDICTED: Rattus norvegicus tumor suppressor candidate 4 (predicted) (Tusc4_predicted), mRNA.	Tusc4_predicted	1.21892
ILMN_1349513	Rattus norvegicus X-ray repair complementing defective repair in Chinese hamster cells 6 (Xrcc6), mRNA.	Xrcc6	1.21888
ILMN_1355617	PREDICTED: Rattus norvegicus zinc finger protein 692 (predicted) (Zfp692_predicted), mRNA.	Zfp692_predicted	1.21835
ILMN_1374774	Rattus norvegicus presenilin enhancer 2 homolog (C. elegans) (Psenen), mRNA.	Psenen	1.21816
ILMN_1368928	PREDICTED: Rattus norvegicus ankyrin repeat domain 50 (predicted) (Ankrd50_predicted), mRNA.	Ankrd50_predicted	1.21812
ILMN_1359985	PREDICTED: Rattus norvegicus polymerase (RNA) III (DNA directed) polypeptide H (predicted) (Polr3h_predicted), mRNA.	Polr3h_predicted	1.21778
ILMN_1359081	Rattus norvegicus NIN1/RPN12 binding protein 1 homolog (S. cerevisiae) (Nob1), mRNA.	Nob1	1.21767
ILMN_1365482	Rattus norvegicus zinc finger protein 422 (Zfp422), mRNA.	Zfp422	1.21721
ILMN_1365134	Rattus norvegicus deleted in bladder cancer 1 (Dbc1), mRNA.	Dbc1	1.21689
ILMN_1364908	PREDICTED: Rattus norvegicus transmembrane, prostate androgen induced RNA (predicted) (Tmepai_predicted), mRNA.	Tmepai_predicted	1.2163
ILMN_1357785	PREDICTED: Rattus norvegicus odd Oz/ten-m homolog 3 (Drosophila) (predicted) (Odz3_predicted), mRNA.	Odz3_predicted	1.2162
ILMN_1363878	PREDICTED: Rattus norvegicus similar to hydroxyacyl-Coenzyme A dehydrogenase/3-ketoacyl-Coenzyme A thiolase/enoyl-Coenzyme A hydratase (trifunctional protein), alpha subunit (LOC500621), mRNA.	LOC500621	1.21607
ILMN_1353604	PREDICTED: Rattus norvegicus BMP-binding endothelial regulator (predicted) (Bmper_predicted), mRNA.	Bmper_predicted	1.21606
ILMN_1356217	PREDICTED: Rattus norvegicus solute carrier family 35 (CMP-sialic acid transporter), member 1 (predicted) (Slc35a1_predicted), mRNA.	Slc35a1_predicted	1.21594
ILMN_1350274	PREDICTED: Rattus norvegicus ephrin A4 (predicted) (Efna4_predicted), mRNA.	Efna4_predicted	1.21578
ILMN_1356190	PREDICTED: Rattus norvegicus AT hook containing transcription factor 1 (predicted) (Ahctf1_predicted), mRNA.	Ahctf1_predicted	1.2157
ILMN_1372152	PREDICTED: Rattus norvegicus development and differentiation enhancing (predicted) (Ddef1_predicted), mRNA.	Ddef1_predicted	1.21542
ILMN_1360850	Rattus norvegicus Wilms tumor 1 (Wt1), mRNA.	Wt1	1.21478
ILMN_1357359	PREDICTED: Rattus norvegicus solute carrier family 24 (sodium/potassium/calcium exchanger), member 4 (predicted) (Slc24a4_predicted), mRNA.	Slc24a4_predicted	1.2146
ILMN_1370349	Rattus norvegicus amyloid beta (A4) precursor protein-binding, family B, member 3 (Apbb3), mRNA.	Apbb3	1.21338
ILMN_1361625	PREDICTED: Rattus norvegicus similar to LRRGT00194 (LOC361885), mRNA.	LOC361885	1.21338
ILMN_1357459	PREDICTED: Rattus norvegicus similar to U7 snRNA-associated Sm-like protein Lsm11 (predicted) (RGD1565523_predicted), mRNA.	RGD1565523_predicted	1.2132
ILMN_1376249	Rattus norvegicus transferrin (Trf), mRNA.	Trf	1.21306
ILMN_1376802	Rattus norvegicus ectodermal-neural cortex 1 (Enc1), mRNA.	Enc1	1.21282
ILMN_1352362	PREDICTED: Rattus norvegicus small nuclear ribonucleoprotein D2 (predicted) (Snrpd2_predicted), mRNA.	Snrpd2_predicted	1.21268
ILMN_1361370	PREDICTED: Rattus norvegicus RING1 and YY1 binding protein (predicted) (Rybp_predicted), mRNA.	Rybp_predicted	1.21222
ILMN_1357994	PREDICTED: Rattus norvegicus similar to cDNA sequence BC013529 (predicted), transcript variant 2 (RGD1309759_predicted), mRNA.	RGD1309759_predicted	1.21205
ILMN_1363337	PREDICTED: Rattus norvegicus similar to 60S ribosomal protein L7a (predicted) (RGD1564370_predicted), mRNA.	RGD1564370_predicted	1.21191
ILMN_1360659	Rattus norvegicus WNT1 inducible signaling pathway protein 1 (Wisp1), mRNA.	Wisp1	1.21189
ILMN_1357411	Rattus norvegicus granulin (Grn), mRNA.	Grn	1.21171
ILMN_1354107	Rattus norvegicus ribosomal protein L37 (Rpl37), mRNA.	Rpl37	1.21168
ILMN_1369090	PREDICTED: Rattus norvegicus TM2 domain containing 3 (predicted) (Tm2d3_predicted), mRNA.	Tm2d3_predicted	1.21132
ILMN_1349906	Rattus norvegicus caspase 2 (Casp2), mRNA.	Casp2	1.21122
ILMN_1374575	Rattus norvegicus insulin-like growth factor 1 receptor (Igf1r), mRNA.	Igf1r	1.21114
ILMN_1356007	PREDICTED: Rattus norvegicus tubulin, gamma complex associated protein 5 (predicted) (Tubgcp5_predicted), mRNA.	Tubgcp5_predicted	1.21104
ILMN_1371446	Rattus norvegicus ring finger protein 138 (Rnf138), mRNA.	Rnf138	1.21084
ILMN_1350576	PREDICTED: Rattus norvegicus similar to palladin (LOC290704), mRNA.	LOC290704	1.21077
ILMN_1357905	PREDICTED: Rattus norvegicus exostoses (multiple)-like 2 (Extl2), mRNA.	Extl2	1.21067
ILMN_1530353	AGENCOURT_31479076 NIH_MGC_251 Rattus norvegicus cDNA clone IMAGE:7385236 5', mRNA		1.21059
ILMN_1650346	PREDICTED: Rattus norvegicus similar to LIM and senescent cell antigen-like domains 1 (predicted) (RGD1560732_predicted), mRNA.	RGD1560732_predicted	1.20975
ILMN_1374238	PREDICTED: Rattus norvegicus similar to Fc receptor-like and mucin-like 1 (LOC690312), mRNA.	LOC690312	1.20924
ILMN_1371931	Rattus norvegicus RAS-like family 11 member A (Rasl11a), mRNA.	Rasl11a	1.20906
ILMN_1365885	Rattus norvegicus matrix metallopeptidase 14 (membrane-inserted) (Mmp14), mRNA.	Mmp14	1.20842
ILMN_1365236	Rattus norvegicus RNA (guanine-7-) methyltransferase (Rnmt), mRNA.	Rnmt	1.20823
ILMN_1364535	Rattus norvegicus RNA binding motif protein 39 (Rbm39), mRNA.	Rbm39	1.20779
ILMN_1368622	Rattus norvegicus leucine rich repeat containing 41 (Lrrc41), mRNA.	Lrrc41	1.20713
ILMN_1354013	Rattus norvegicus glypican 3 (Gpc3), mRNA.	Gpc3	1.20693
ILMN_1353264	PREDICTED: Rattus norvegicus neural precursor cell expressed, developmentally down-regulated gene 4A (Nedd4a), mRNA.	Nedd4a	1.20678
ILMN_1350958	PREDICTED: Rattus norvegicus similar to Ac1-163 (LOC498644), mRNA.	LOC498644	1.20647
ILMN_1351710	Rattus norvegicus family with sequence similarity 3, member C (Fam3c), mRNA.	Fam3c	1.20576
ILMN_1349992	PREDICTED: Rattus norvegicus similar to GTPase activating protein testicular GAP1 (LOC501456), mRNA.	LOC501456	1.20575
ILMN_1365194	PREDICTED: Rattus norvegicus interleukin 16 (mapped) (Il16_mapped), mRNA.	Il16_mapped	1.20548
ILMN_1358516	PREDICTED: Rattus norvegicus similar to mucin 7, salivary (predicted) (RGD1311530_predicted), mRNA.	RGD1311530_predicted	1.20507
ILMN_1368494	Rattus norvegicus presenilin 2 (Psen2), mRNA.	Psen2	1.20484
ILMN_1363338	Rattus norvegicus GATA binding protein 6 (Gata6), mRNA.	Gata6	1.20438
ILMN_1368737	Rattus norvegicus mesothelin (Msln), mRNA.	Msln	1.20381
ILMN_1349238	Rattus norvegicus transforming growth factor alpha (Tgfa), mRNA.	Tgfa	1.20378
ILMN_1361650	PREDICTED: Rattus norvegicus similar to protein containing single MORN motif in testis (predicted) (RGD1563988_predicted), mRNA.	RGD1563988_predicted	1.20354
ILMN_1374365	PREDICTED: Rattus norvegicus transmembrane emp24 protein transport domain containing 4 (predicted) (Tmed4_predicted), mRNA.	Tmed4_predicted	1.20323
ILMN_1374604	Rattus norvegicus 6-pyruvoyl-tetrahydropterin synthase (Pts), mRNA.	Pts	1.2032
ILMN_1363017	PREDICTED: Rattus norvegicus myeloblastosis oncogene-like 1 (predicted) (Mybl1_predicted), mRNA.	Mybl1_predicted	1.20307
ILMN_1356148	PREDICTED: Rattus norvegicus Cdk5 and Abl enzyme substrate 1 (predicted) (Cables1_predicted), mRNA.	Cables1_predicted	1.20302
ILMN_1374693	Rattus norvegicus splicing factor, arginine/serine-rich 6 (Sfrs6), mRNA.	Sfrs6	1.20288
ILMN_1359173	Rattus norvegicus phosphatidylinositol glycan anchor biosynthesis, class Y (Pigy), mRNA.	Pigy	1.20284
ILMN_1369272	PREDICTED: Rattus norvegicus nischarin (Nisch), mRNA.	Nisch	1.20274
ILMN_1372821	PREDICTED: Rattus norvegicus F-box only protein 33 (predicted) (Fbxo33_predicted), mRNA.	Fbxo33_predicted	1.20268
ILMN_1365681	Rattus norvegicus SNAP-associated protein (Snapap), mRNA.	Snapap	1.2024
ILMN_1357010	PREDICTED: Rattus norvegicus similar to RIKEN cDNA 4121402D02 (predicted) (RGD1564778_predicted), mRNA.	RGD1564778_predicted	1.20206
ILMN_1376540	Rattus norvegicus spermatogenesis associated 7 (Spata7), mRNA.	Spata7	1.20165
ILMN_1376846	Rattus norvegicus lysyl oxidase-like 1 (Loxl1), mRNA.	Loxl1	1.20116
ILMN_1349231	PREDICTED: Rattus norvegicus RNA binding motif protein 25 (predicted) (Rbm25_predicted), mRNA.	Rbm25_predicted	1.20102
ILMN_1354162	Rattus norvegicus WD repeat domain 34 (Wdr34), mRNA.	Wdr34	1.2009
ILMN_1361818	PREDICTED: Rattus norvegicus ADP-ribosyltransferase (NAD+; poly (ADP-ribose) polymerase)-like 1 (Adprtl1), mRNA.	Adprtl1	1.20087
ILMN_1359727	PREDICTED: Rattus norvegicus catenin (cadherin associated protein), delta 1 (predicted) (Ctnnd1_predicted), mRNA.	Ctnnd1_predicted	1.20076
ILMN_1364747	Rattus norvegicus ajuba (Jub), mRNA.	Jub	1.20049
ILMN_1362886	Rattus norvegicus heterochromatin protein 1, binding protein 3 (Hp1bp3), mRNA.	Hp1bp3	1.2004
ILMN_1359287	PREDICTED: Rattus norvegicus similar to RIKEN cDNA D130064H19 (predicted) (LOC310086), mRNA.	LOC310086	1.20011
ILMN_1373691	PREDICTED: Rattus norvegicus similar to integrin beta-5 (predicted) (RGD1563276_predicted), mRNA.	RGD1563276_predicted	1.20011
ILMN_1354937	Rattus norvegicus ribosomal protein L13 (Rpl13), mRNA.	Rpl13	1.20011
ILMN_1651155	PREDICTED: Rattus norvegicus similar to ribonucleotide reductase M1 (LOC685579), mRNA.	LOC685579	1.20006
ILMN_1353217	PREDICTED: Rattus norvegicus signal recognition particle 68 (predicted) (Srp68_predicted), mRNA.	Srp68_predicted	-1.20041
ILMN_1360478	PREDICTED: Rattus norvegicus R3H domain containing 1, transcript variant 3 (R3hdm1), mRNA.	R3hdm1	-1.20072
ILMN_1351775	PREDICTED: Rattus norvegicus Down syndrome critical region homolog 2 (human) (predicted) (Dscr2_predicted), mRNA.	Dscr2_predicted	-1.20085
ILMN_1352667	Rattus norvegicus Ngfi-A binding protein 1 (Nab1), mRNA.	Nab1	-1.20098
ILMN_1353139	Rattus norvegicus cystatin B (Cstb), mRNA.	Cstb	-1.20121
ILMN_1370585	PREDICTED: Rattus norvegicus arginine-rich, mutated in early stage tumors (predicted) (Armet_predicted), mRNA.	Armet_predicted	-1.20132
ILMN_1356008	Rattus norvegicus similar to hypothetical protein FLJ22624 (RGD1309522), mRNA.	RGD1309522	-1.2015
ILMN_1366945	Rattus norvegicus chemokine-like factor (Cklf), mRNA.	Cklf	-1.20174
ILMN_1367537	PREDICTED: Rattus norvegicus sphingosine-1-phosphate phosphatase 1 (Sgpp1), mRNA.	Sgpp1	-1.20182
ILMN_1530391	Rattus norvegicus phospholysine phosphohistidine inorganic pyrophosphate phosphatase (Lhpp), mRNA.	Lhpp	-1.20201
ILMN_1365578	PREDICTED: Rattus norvegicus similar to Ferritin light chain 2 (Ferritin L subunit 2) (Ferritin subunit LG) (predicted) (RGD1561055_predicted), mRNA.	RGD1561055_predicted	-1.20305
ILMN_1370511	Rattus norvegicus ATP synthase, H+ transporting, mitochondrial F0 complex, subunit c (subunit 9), isoform 1 (Atp5g1), nuclear gene encoding mitochondrial protein, mRNA.	Atp5g1	-1.20307
ILMN_1375368	PREDICTED: Rattus norvegicus potassium voltage-gated channel, subfamily Q, member 5 (Kcnq5), mRNA.	Kcnq5	-1.20312
ILMN_1375038	Rattus norvegicus ephrin B1 (Efnb1), mRNA.	Efnb1	-1.20317
ILMN_1365351	Rattus norvegicus homer homolog 2 (Drosophila) (Homer2), mRNA.	Homer2	-1.20334
ILMN_1349400	PREDICTED: Rattus norvegicus SEC24 related gene family, member A (S. cerevisiae) (predicted) (Sec24a_predicted), mRNA.	Sec24a_predicted	-1.20342
ILMN_1351721	PREDICTED: Rattus norvegicus similar to apoptosis related protein APR-3; p18 protein (predicted) (RGD1311605_predicted), mRNA.	RGD1311605_predicted	-1.20381
ILMN_1651010	Rattus norvegicus heat shock protein 1 (chaperonin) (Hspd1), nuclear gene encoding mitochondrial protein, mRNA.	Hspd1	-1.20454
ILMN_1374322	PREDICTED: Rattus norvegicus similar to microsomal glutathione S-transferase 3 (predicted) (RGD1561381_predicted), mRNA.	RGD1561381_predicted	-1.20468
ILMN_1363543	Rattus norvegicus serine/threonine kinase 6 (Stk6), mRNA.	Stk6	-1.20478
ILMN_1357680	Rattus norvegicus enolase-phosphatase 1 (Enoph1), mRNA.	Enoph1	-1.20503
ILMN_1359883	PREDICTED: Rattus norvegicus PHD finger protein 17 (predicted) (Phf17_predicted), mRNA.	Phf17_predicted	-1.20601
ILMN_1368269	PREDICTED: Rattus norvegicus similar to Eno1 protein (predicted) (RGD1561111_predicted), mRNA.	RGD1561111_predicted	-1.20611
ILMN_1364140	Rattus norvegicus COP9 (constitutive photomorphogenic) homolog, subunit 5 (Arabidopsis thaliana) (Cops5), mRNA.	Cops5	-1.20621
ILMN_1371379	PREDICTED: Rattus norvegicus proteasome (prosome, macropain) 26S subunit, non-ATPase, 5 (predicted) (Psmd5_predicted), mRNA.	Psmd5_predicted	-1.2064
ILMN_1372667	PREDICTED: Rattus norvegicus LOC500676 (LOC500676), mRNA.	LOC500676	-1.20685
ILMN_1354033	PREDICTED: Rattus norvegicus exosome component 8 (predicted) (Exosc8_predicted), mRNA.	Exosc8_predicted	-1.20688
ILMN_1351027	Rattus norvegicus cysteine and glycine-rich protein 2 (Csrp2), mRNA.	Csrp2	-1.20706
ILMN_1364292	Rattus norvegicus similar to RIKEN cDNA 2610528E23 (RGD1309437), mRNA.	RGD1309437	-1.20719
ILMN_1373201	Rattus norvegicus eukaryotic translation initiation factor 4A1 (Eif4a1), mRNA.	Eif4a1	-1.20724
ILMN_1364567	PREDICTED: Rattus norvegicus ATP binding domain 1 family, member B (predicted) (Atpbd1b_predicted), mRNA.	Atpbd1b_predicted	-1.20727
ILMN_1364673	PREDICTED: Rattus norvegicus similar to paraneoplastic antigen like 5 (predicted) (RGD1565857_predicted), mRNA.	RGD1565857_predicted	-1.2074
ILMN_1349524	PREDICTED: Rattus norvegicus meningioma expressed antigen 6 (coiled-coil proline-rich) (predicted) (Mgea6_predicted), mRNA.	Mgea6_predicted	-1.20755
ILMN_1530390	Rattus norvegicus transmembrane protein 140 (Tmem140), mRNA.	Tmem140	-1.20759
ILMN_1364154	PREDICTED: Rattus norvegicus similar to glyceraldehyde-3-phosphate dehydrogenase (LOC686275), mRNA.	LOC686275	-1.20766
ILMN_1348795	PREDICTED: Rattus norvegicus similar to 40S ribosomal protein SA (p40) (34/67 kDa laminin receptor) (predicted) (RGD1562225_predicted), mRNA.	RGD1562225_predicted	-1.20837
ILMN_1369816	Rattus norvegicus eukaryotic translation initiation factor 1A (Eif1a), mRNA.	Eif1a	-1.20907
ILMN_1359760	Rattus norvegicus ribosomal protein L18 (Rpl18), mRNA.	Rpl18	-1.20919
ILMN_1355215	Rattus norvegicus COMM domain containing 10 (Commd10), mRNA.	Commd10	-1.2094
ILMN_1359527	PREDICTED: Rattus norvegicus DNP-specific IgE (IgE FE-3), mRNA.	IgE FE-3	-1.20984
ILMN_1357950	PREDICTED: Rattus norvegicus similar to spermidine synthase (LOC362121), mRNA.	LOC362121	-1.21012
ILMN_1364199	PREDICTED: Rattus norvegicus ring finger protein 121 (predicted) (Rnf121_predicted), mRNA.	Rnf121_predicted	-1.21047
ILMN_1350706	PREDICTED: Rattus norvegicus similar to glyceraldehyde-3-phosphate dehydrogenase (LOC295420), mRNA.	LOC295420	-1.21055
ILMN_1365591	PREDICTED: Rattus norvegicus similar to WD repeat domain 53 (predicted) (RGD1559546_predicted), mRNA.	RGD1559546_predicted	-1.2109
ILMN_1351408	Rattus norvegicus solute carrier family 7 (cationic amino acid transporter, y+ system), member 1 (Slc7a1), mRNA.	Slc7a1	-1.21091
ILMN_1650896	Rattus norvegicus osteoclast stimulating factor 1 (Ostf1), mRNA.	Ostf1	-1.21194
ILMN_1373473	Rattus norvegicus acetyl-coenzyme A acetyltransferase 1 (Acat1), nuclear gene encoding mitochondrial protein, mRNA.	Acat1	-1.21211
ILMN_1375064	Rattus norvegicus CD82 antigen (Cd82), mRNA.	Cd82	-1.21338
ILMN_1351859	Rattus norvegicus similar to semaF cytoplasmic domain associated protein 2 (LOC365960), mRNA.	LOC365960	-1.21386
ILMN_1369062	Rattus norvegicus phosphofructokinase, liver, B-type (Pfkl), mRNA.	Pfkl	-1.21389
ILMN_1358842	PREDICTED: Rattus norvegicus similar to RIKEN cDNA 2510038A11 (predicted) (RGD1562823_predicted), mRNA.	RGD1562823_predicted	-1.21438
ILMN_1356731	PREDICTED: Rattus norvegicus similar to NADH:ubiquinone oxidoreductase B15 subunit (LOC499131), mRNA.	LOC499131	-1.21487
ILMN_1366253	PREDICTED: Rattus norvegicus hypothetical LOC287935 (predicted) (RGD1308065_predicted), mRNA.	RGD1308065_predicted	-1.21489
ILMN_1365618	PREDICTED: Rattus norvegicus similar to RIKEN cDNA 1700018B24 (predicted) (RGD1307595_predicted), mRNA.	RGD1307595_predicted	-1.21518
ILMN_1360881	Rattus norvegicus similar to RIKEN cDNA 1110001J03 (MGC112899), mRNA.	MGC112899	-1.21549
ILMN_1351141	PREDICTED: Rattus norvegicus similar to RIKEN cDNA 2600017H02 (LOC497936), mRNA.	LOC497936	-1.2159
ILMN_1352005	Rattus norvegicus MID1 interacting protein 1 (gastrulation specific G12 homolog (zebrafish)) (Mid1ip1), mRNA.	Mid1ip1	-1.21623
ILMN_1350074	PREDICTED: Rattus norvegicus similar to hypothetical protein D10Ertd438e (predicted) (RGD1307879_predicted), mRNA.	RGD1307879_predicted	-1.21663
ILMN_1372184	PREDICTED: Rattus norvegicus similar to glutamate receptor, ionotropic, N-methyl D-aspartate-like 1A (LOC689811), mRNA.	LOC689811	-1.21701
ILMN_1650149	PREDICTED: Rattus norvegicus polymerase (RNA) II (DNA directed) polypeptide J (predicted) (Polr2j_predicted), mRNA.	Polr2j_predicted	-1.21733
ILMN_1357593	PREDICTED: Rattus norvegicus TAF5 RNA polymerase II, TATA box binding protein (TBP)-associated factor (predicted) (Taf5_predicted), mRNA.	Taf5_predicted	-1.21757
ILMN_1359878	PREDICTED: Rattus norvegicus grancalcin (predicted) (Gca_predicted), mRNA.	Gca_predicted	-1.21776
ILMN_1367908	PREDICTED: Rattus norvegicus similar to Discs large homolog 5 (Placenta and prostate DLG) (Discs large protein P-dlg) (LOC363434), mRNA.	LOC363434	-1.21835
ILMN_1359643	PREDICTED: Rattus norvegicus immature colon carcinoma transcript 1 (predicted) (Ict1_predicted), mRNA.	Ict1_predicted	-1.21838
ILMN_1371204	Rattus norvegicus ubiquinol-cytochrome c reductase core protein 1 (Uqcrc1), mRNA.	Uqcrc1	-1.21866
ILMN_1363774	Rattus norvegicus tropomyosin 3, gamma (Tpm3), transcript variant 1, mRNA.	Tpm3	-1.21917
ILMN_2039248	PREDICTED: Rattus norvegicus arginyl-tRNA synthetase (predicted) (Rars_predicted), mRNA.	Rars_predicted	-1.21921
ILMN_1353674	Rattus norvegicus interferon-induced protein 35 (Ifi35), mRNA.	Ifi35	-1.2194
ILMN_1356806	Rattus norvegicus serine (or cysteine) peptidase inhibitor, clade H, member 1 (Serpinh1), mRNA.	Serpinh1	-1.21959
ILMN_1354236	Rattus norvegicus Fas-associated factor 1 (Faf1), mRNA.	Faf1	-1.22028
ILMN_1356243	Rattus norvegicus proteasome (prosome, macropain) 26S subunit, non-ATPase, 12 (Psmd12), mRNA.	Psmd12	-1.2203
ILMN_1368780	Rattus norvegicus chloride intracellular channel 2 (Clic2), mRNA.	Clic2	-1.22048
ILMN_1354390	PREDICTED: Rattus norvegicus similar to RIKEN cDNA 8430426H19 (LOC498687), mRNA.	LOC498687	-1.2206
ILMN_1650776	Rattus norvegicus immunoglobulin superfamily, member 11 (Igsf11), mRNA.	Igsf11	-1.22094
ILMN_1358763	Rattus norvegicus similar to DNA segment, Chr 14, ERATO Doi 449, expressed (RGD1305689), mRNA.	RGD1305689	-1.22133
ILMN_1367571	PREDICTED: Rattus norvegicus similar to glyceraldehyde-3-phosphate dehydrogenase (predicted) (RGD1564688_predicted), mRNA.	RGD1564688_predicted	-1.22147
ILMN_1363325	Rattus norvegicus peroxiredoxin 5 (Prdx5), nuclear gene encoding mitochondrial protein, mRNA.	Prdx5	-1.22154
ILMN_1651012	PREDICTED: Rattus norvegicus similar to Dolichol-phosphate mannosyltransferase subunit 3 (Dolichol-phosphate mannose synthase subunit 3) (Dolichyl-phosphate beta-D-mannosyltransferase subunit 3) (Mannose-P-dolichol synthase subunit 3) (MPD synthase subunit 3) (DPM synthase com... (LOC692000), mRNA.	LOC692000	-1.22162
ILMN_1359659	PREDICTED: Rattus norvegicus mitochondrial ribosomal protein L50 (predicted) (Mrpl50_predicted), mRNA.	Mrpl50_predicted	-1.22207
ILMN_1366346	Rattus norvegicus epithelial membrane protein 3 (Emp3), mRNA.	Emp3	-1.22226
ILMN_1356431	PREDICTED: Rattus norvegicus RGD1560158 (predicted) (RGD1560158_predicted), mRNA.	RGD1560158_predicted	-1.22332
ILMN_1649829	Rattus norvegicus cAMP responsive element binding protein 1 (Creb1), transcript variant A, mRNA.	Creb1	-1.22345
ILMN_1357757	Rattus norvegicus 3-hydroxybutyrate dehydrogenase, type 1 (Bdh1), nuclear gene encoding mitochondrial protein, mRNA.	Bdh1	-1.22355
ILMN_1370450	Rattus norvegicus 2,4-dienoyl CoA reductase 1, mitochondrial (Decr1), nuclear gene encoding mitochondrial protein, mRNA.	Decr1	-1.22359
ILMN_1367182	PREDICTED: Rattus norvegicus WD repeat domain 75 (Wdr75), mRNA.	Wdr75	-1.22412
ILMN_1376954	Rattus norvegicus ubiquitin carboxyl-terminal esterase L5 (Uchl5), mRNA.	Uchl5	-1.22543
ILMN_1367817	Rattus norvegicus PHD finger protein 5A (Phf5a), mRNA.	Phf5a	-1.22546
ILMN_1357206	PREDICTED: Rattus norvegicus cytochrome c-1 (predicted) (Cyc1_predicted), mRNA.	Cyc1_predicted	-1.22567
ILMN_1363864	PREDICTED: Rattus norvegicus centromere protein E (predicted) (Cenpe_predicted), mRNA.	Cenpe_predicted	-1.22614
ILMN_1351635	Rattus norvegicus splicing factor, arginine/serine-rich 2 (SC-35) (Sfrs2), mRNA.	Sfrs2	-1.22664
ILMN_1361129	Rattus norvegicus chloride intracellular channel 3 (Clic3), mRNA.	Clic3	-1.22674
ILMN_1650651	PREDICTED: Rattus norvegicus holocytochrome c synthetase (predicted) (Hccs_predicted), mRNA.	Hccs_predicted	-1.22702
ILMN_2040046	Rattus norvegicus proteasome (prosome, macropain) subunit, beta type 10 (Psmb10), mRNA.	Psmb10	-1.22728
ILMN_1650328	PREDICTED: Rattus norvegicus RNA, U3 small nucleolar interacting protein 2 (predicted) (Rnu3ip2_predicted), mRNA.	Rnu3ip2_predicted	-1.22736
ILMN_1367676	Rattus norvegicus GINS complex subunit 4 (Sld5 homolog) (Gins4), mRNA.	Gins4	-1.22752
ILMN_1364018	PREDICTED: Rattus norvegicus RGD1562114 (predicted) (RGD1562114_predicted), mRNA.	RGD1562114_predicted	-1.22769
ILMN_1649965	PREDICTED: Rattus norvegicus carbonic anhydrase 14 (predicted) (Car14_predicted), mRNA.	Car14_predicted	-1.22792
ILMN_1369522	Rattus norvegicus small glutamine-rich tetratricopeptide repeat (TPR)-containing, alpha (Sgta), mRNA.	Sgta	-1.22806
ILMN_1362167	Rattus norvegicus myo-inositol 1-phosphate synthase A1 (Isyna1), mRNA.	Isyna1	-1.22826
ILMN_1350438	Rattus norvegicus nuclear factor of kappa light chain gene enhancer in B-cells inhibitor, beta (Nfkbib), mRNA.	Nfkbib	-1.22873
ILMN_1376519	Rattus norvegicus nucleotide binding protein 2 (Nubp2), mRNA.	Nubp2	-1.22885
ILMN_1374332	Rattus norvegicus heat shock 27kDa protein 1 (Hspb1), mRNA.	Hspb1	-1.22893
ILMN_1360648	Rattus norvegicus GCD14/PCMT domain containing protein RGD1359191 (RGD1359191), mRNA.	RGD1359191	-1.2299
ILMN_1358946	PREDICTED: Rattus norvegicus coactosin-like 1 (Dictyostelium) (predicted) (Cotl1_predicted), mRNA.	Cotl1_predicted	-1.23029
ILMN_1359694	Rattus norvegicus lectin, galactose binding, soluble 8 (Lgals8), mRNA.	Lgals8	-1.23029
ILMN_1360876	Rattus norvegicus transmembrane protein 97 (Tmem97), mRNA.	Tmem97	-1.23083
ILMN_1368078	PREDICTED: Rattus norvegicus similar to hypothetical protein MGC36831 (predicted) (RGD1306215_predicted), mRNA.	RGD1306215_predicted	-1.23108
ILMN_2039517	PREDICTED: Rattus norvegicus IMP (inosine monophosphate) dehydrogenase 1 (predicted) (Impdh1_predicted), mRNA.	Impdh1_predicted	-1.23137
ILMN_1361584	PREDICTED: Rattus norvegicus similar to citrin (predicted) (RGD1565889_predicted), mRNA.	RGD1565889_predicted	-1.23168
ILMN_1651057	Rattus norvegicus ST3 beta-galactoside alpha-2,3-sialyltransferase 6 (St3gal6), mRNA.	St3gal6	-1.2324
ILMN_1352329	Rattus norvegicus hormone-regulated proliferation associated protein 20 (Hrpap20), mRNA.	Hrpap20	-1.23265
ILMN_1364250	Rattus norvegicus tubulin, alpha 4A (Tuba4a), mRNA.	Tuba4a	-1.23273
ILMN_1353815	PREDICTED: Rattus norvegicus similar to transcription elongation factor B (SIII), polypeptide 1 (predicted) (RGD1565815_predicted), mRNA.	RGD1565815_predicted	-1.23279
ILMN_1354765	PREDICTED: Rattus norvegicus sirtuin 3 (silent mating type information regulation 2, homolog) 3 (S. cerevisiae) (predicted) (Sirt3_predicted), mRNA.	Sirt3_predicted	-1.23316
ILMN_1368184	Rattus norvegicus N-myc (and STAT) interactor (Nmi), mRNA.	Nmi	-1.23318
ILMN_1359864	Rattus norvegicus Yip1 interacting factor homolog (S. cerevisiae) (Yif1), mRNA.	Yif1	-1.23339
ILMN_1368251	PREDICTED: Rattus norvegicus mitochondrial ribosomal protein S18C (predicted) (Mrps18c_predicted), mRNA.	Mrps18c_predicted	-1.23352
ILMN_1359078	Rattus norvegicus solute carrier family 37 (glucose-6-phosphate transporter), member 4 (Slc37a4), mRNA.	Slc37a4	-1.23398
ILMN_1373131	Rattus norvegicus nucleoporin 35 (Nup35), mRNA.	Nup35	-1.23421
ILMN_1364409	PREDICTED: Rattus norvegicus NADH dehydrogenase (ubiquinone) 1 beta subcomplex, 9 (predicted) (Ndufb9_predicted), mRNA.	Ndufb9_predicted	-1.23463
ILMN_1350680	PREDICTED: Rattus norvegicus mitochondrial ribosomal protein L27 (predicted) (Mrpl27_predicted), mRNA.	Mrpl27_predicted	-1.23481
ILMN_1530347	Rattus norvegicus myo-inositol 1-phosphate synthase A1 (Isyna1), mRNA.	Isyna1	-1.23527
ILMN_1354389	PREDICTED: Rattus norvegicus reticuloendotheliosis oncogene (predicted) (Rel_predicted), mRNA.	Rel_predicted	-1.2354
ILMN_1376907	PREDICTED: Rattus norvegicus similar to prohibitin (LOC682174), mRNA.	LOC682174	-1.23603
ILMN_1366121	PREDICTED: Rattus norvegicus similar to RIKEN cDNA 2610510L01 (predicted) (RGD1559774_predicted), mRNA.	RGD1559774_predicted	-1.23779
ILMN_1358373	PREDICTED: Rattus norvegicus Mak3 homolog (S. cerevisiae) (predicted) (Mak3_predicted), mRNA.	Mak3_predicted	-1.23849
ILMN_1376531	Rattus norvegicus transmembrane 7 superfamily member 3 (Tm7sf3), mRNA.	Tm7sf3	-1.23891
ILMN_1348866	Rattus norvegicus quinoid dihydropteridine reductase (Qdpr), mRNA.	Qdpr	-1.23952
ILMN_1355968	PREDICTED: Rattus norvegicus brix domain containing 1 (predicted) (Bxdc1_predicted), mRNA.	Bxdc1_predicted	-1.24042
ILMN_1361407	PREDICTED: Rattus norvegicus Nedd4 family interacting protein 2 (predicted) (Ndfip2_predicted), mRNA.	Ndfip2_predicted	-1.24048
ILMN_1366784	Rattus norvegicus vesicle amine transport protein 1 homolog (T californica) (Vat1), mRNA.	Vat1	-1.2409
ILMN_1373115	PREDICTED: Rattus norvegicus mitochondrial ribosomal protein S36 (predicted) (Mrps36_predicted), mRNA.	Mrps36_predicted	-1.2411
ILMN_1651074	Rattus norvegicus RNA polymerase 1-2 (Rpo1-2), mRNA.	Rpo1-2	-1.24192
ILMN_1351732	PREDICTED: Rattus norvegicus similar to Glyceraldehyde-3-phosphate dehydrogenase (GAPDH) (LOC688528), mRNA.	LOC688528	-1.24327
ILMN_1362435	PREDICTED: Rattus norvegicus chemokine (C-C motif) receptor-like 2 (predicted) (Ccrl2_predicted), mRNA.	Ccrl2_predicted	-1.24368
ILMN_1354206	Rattus norvegicus tubulin, alpha 1A (Tuba1a), mRNA.	Tuba1a	-1.24425
ILMN_1365783	PREDICTED: Rattus norvegicus heat shock 70kDa protein 4-like (predicted) (Hspa4l_predicted), mRNA.	Hspa4l_predicted	-1.24429
ILMN_1371360	PREDICTED: Rattus norvegicus membralin (RGD1311136), mRNA.	RGD1311136	-1.24442
ILMN_1358686	Rattus norvegicus ribosomal protein L5 (Rpl5), mRNA.	Rpl5	-1.24556
ILMN_1650290	PREDICTED: Rattus norvegicus histone 2, H3c2 (predicted) (Hist2h3c2_predicted), mRNA.	Hist2h3c2_predicted	-1.2459
ILMN_1356608	PREDICTED: Rattus norvegicus hypothetical gene supported by BC061525 (LOC499201), mRNA.	LOC499201	-1.2459
ILMN_1370324	Rattus norvegicus eukaryotic translation initiation factor 2B, subunit 3 (Eif2b3), mRNA.	Eif2b3	-1.24694
ILMN_1351960	PREDICTED: Rattus norvegicus similar to glyceraldehyde-3-phosphate dehydrogenase (LOC500506), mRNA.	LOC500506	-1.24741
ILMN_1362728	Rattus norvegicus proteasome (prosome, macropain) subunit, beta type 8 (large multifunctional peptidase 7) (Psmb8), mRNA.	Psmb8	-1.2478
ILMN_1364236	Rattus norvegicus 5-aminoimidazole-4-carboxamide ribonucleotide formyltransferase/IMP cyclohydrolase (Atic), mRNA.	Atic	-1.24846
ILMN_1360448	PREDICTED: Rattus norvegicus similar to U5 snRNP-specific protein (Prp8-binding) (predicted) (RGD1309198_predicted), mRNA.	RGD1309198_predicted	-1.24854
ILMN_1370848	PREDICTED: Rattus norvegicus deltex 4 homolog (Drosophila) (Dtx4), mRNA.	Dtx4	-1.24889
ILMN_1367544	PREDICTED: Rattus norvegicus N-acetyltransferase ARD1 homolog (S. cerevisiae) (predicted) (Ard1_predicted), mRNA.	Ard1_predicted	-1.24985
ILMN_1350983	Rattus norvegicus farnesyl diphosphate synthetase (Fdps), mRNA.	Fdps	-1.25065
ILMN_1352242	Rattus norvegicus H1 histone family, member 0 (H1f0), mRNA.	H1f0	-1.25076
ILMN_1363982	Rattus norvegicus pyruvate dehydrogenase kinase, isoenzyme 1 (Pdk1), nuclear gene encoding mitochondrial protein, mRNA.	Pdk1	-1.25094
ILMN_1350607	Rattus norvegicus seven in absentia 2 (Siah2), mRNA.	Siah2	-1.25123
ILMN_1364303	PREDICTED: Rattus norvegicus similar to citrate synthase (LOC299750), mRNA.	LOC299750	-1.2516
ILMN_1360145	Rattus norvegicus steroid receptor RNA activator 1 (Sra1), mRNA.	Sra1	-1.25172
ILMN_1649861	PREDICTED: Rattus norvegicus similar to Centrosomal protein of 27 kDa (Cep27 protein) (LOC691918), mRNA.	LOC691918	-1.25202
ILMN_1350007	Rattus norvegicus DnaJ (Hsp40) homolog, subfamily B, member 11 (Dnajb11), mRNA.	Dnajb11	-1.25218
ILMN_1359370	Rattus norvegicus adhesion regulating molecule 1 (Adrm1), mRNA.	Adrm1	-1.2524
ILMN_1357961	PREDICTED: Rattus norvegicus similar to CDNA sequence BC024561 (predicted) (RGD1304717_predicted), mRNA.	RGD1304717_predicted	-1.25255
ILMN_1373618	Rattus norvegicus cyclin H (Ccnh), mRNA.	Ccnh	-1.25389
ILMN_1371645	Rattus norvegicus lipolysis stimulated lipoprotein receptor (Lsr), mRNA.	Lsr	-1.25416
ILMN_1375496	Rattus norvegicus sequestosome 1 (Sqstm1), transcript variant 2, mRNA.	Sqstm1	-1.25433
ILMN_1356610	PREDICTED: Rattus norvegicus THO complex 1 (Thoc1), mRNA.	Thoc1	-1.25589
ILMN_1365165	Rattus norvegicus brain protein 44-like (Brp44l), mRNA.	Brp44l	-1.25632
ILMN_1372021	PREDICTED: Rattus norvegicus similar to NADH dehydrogenase (ubiquinone) 1 beta subcomplex, 4, 15kDa (LOC690428), mRNA.	LOC690428	-1.25636
ILMN_1369432	Rattus norvegicus polo-like kinase 1 (Drosophila) (Plk1), mRNA.	Plk1	-1.25688
ILMN_1650736	PREDICTED: Rattus norvegicus similar to glyceraldehyde-3-phosphate dehydrogenase (predicted) (RGD1565368_predicted), mRNA.	RGD1565368_predicted	-1.25747
ILMN_1360629	PREDICTED: Rattus norvegicus small nuclear ribonucleoprotein polypeptide A' (predicted) (Snrpa1_predicted), mRNA.	Snrpa1_predicted	-1.25771
ILMN_1357962	Rattus norvegicus neuroblastoma, suppression of tumorigenicity 1 (Nbl1), mRNA.	Nbl1	-1.25791
ILMN_1358078	PREDICTED: Rattus norvegicus hepatitis B virus x interacting protein (predicted) (Hbxip_predicted), mRNA.	Hbxip_predicted	-1.25798
ILMN_1373472	Rattus norvegicus ubiquitin-conjugating enzyme E2L 6 (Ube2l6), mRNA.	Ube2l6	-1.25865
ILMN_1365610	PREDICTED: Rattus norvegicus similar to Delta-interacting protein A (Hepatitis delta antigen interacting protein A) (predicted) (RGD1565319_predicted), mRNA.	RGD1565319_predicted	-1.26078
ILMN_1366813	Rattus norvegicus palmitoyl-protein thioesterase 2 (Ppt2), mRNA.	Ppt2	-1.26184
ILMN_1370750	Rattus norvegicus calcium and integrin binding 1 (calmyrin) (Cib1), mRNA.	Cib1	-1.26206
ILMN_1371140	PREDICTED: Rattus norvegicus coatomer protein complex, subunit epsilon (predicted) (Cope_predicted), mRNA.	Cope_predicted	-1.26223
ILMN_1351124	Rattus norvegicus SEC13 homolog (S. cerevisiae) (Sec13), mRNA.	Sec13	-1.26259
ILMN_1376674	Rattus norvegicus leucine aminopeptidase 3 (Lap3), mRNA.	Lap3	-1.26269
ILMN_1376279	Rattus norvegicus Fas-activated serine/threonine kinase (Fastk), mRNA.	Fastk	-1.26288
ILMN_1369934	Rattus norvegicus adenosine monophosphate deaminase 3 (Ampd3), mRNA.	Ampd3	-1.26338
ILMN_1350639	Rattus norvegicus DEAD (Asp-Glu-Ala-Asp) box polypeptide 56 (Ddx56), mRNA.	Ddx56	-1.26557
ILMN_1353874	Rattus norvegicus cystathionine beta synthase (Cbs), mRNA.	Cbs	-1.26612
ILMN_1365626	Rattus norvegicus opioid receptor, sigma 1 (Oprs1), mRNA.	Oprs1	-1.26643
ILMN_1360762	Rattus norvegicus ADP-ribosylation factor 1 (Arf1), mRNA.	Arf1	-1.2667
ILMN_1362604	Rattus norvegicus vanin 1 (Vnn1), mRNA.	Vnn1	-1.26682
ILMN_1349127	Rattus norvegicus alkB, alkylation repair homolog 3 (E. coli) (Alkbh3), mRNA.	Alkbh3	-1.26698
ILMN_1368841	Rattus norvegicus leucine rich repeat containing 59 (Lrrc59), mRNA.	Lrrc59	-1.2677
ILMN_1361581	Rattus norvegicus superoxide dismutase 3, extracellular (Sod3), mRNA.	Sod3	-1.26934
ILMN_1349689	Rattus norvegicus proteasome (prosome, macropain) subunit, alpha type 1 (Psma1), mRNA.	Psma1	-1.26956
ILMN_1354766	Rattus norvegicus proteasome (prosome, macropain) subunit, beta type 6 (Psmb6), mRNA.	Psmb6	-1.26968
ILMN_1364809	Rattus norvegicus cysteine-rich protein 2 (Crip2), mRNA.	Crip2	-1.27115
ILMN_1530350	Rattus norvegicus transmembrane protein 98 (Tmem98), mRNA.	Tmem98	-1.2712
ILMN_1355841	PREDICTED: Rattus norvegicus abhydrolase domain containing 8 (predicted) (Abhd8_predicted), mRNA.	Abhd8_predicted	-1.27159
ILMN_1354317	Rattus norvegicus proteasome (prosome, macropain) 28 subunit, beta (Psme2), mRNA.	Psme2	-1.27276
ILMN_1366139	Rattus norvegicus calcitonin gene-related peptide-receptor component protein (Crcp), mRNA.	Crcp	-1.27287
ILMN_1354106	Rattus norvegicus diazepam binding inhibitor (Dbi), mRNA.	Dbi	-1.2755
ILMN_1350444	Rattus norvegicus proteosome (prosome, macropain) subunit, beta type 9 (Psmb9), mRNA.	Psmb9	-1.27589
ILMN_1365061	Rattus norvegicus tyrosine 3-monooxygenase/tryptophan 5-monooxygenase activation protein, gamma polypeptide (Ywhag), mRNA.	Ywhag	-1.27658
ILMN_1365668	PREDICTED: Rattus norvegicus similar to glutamate receptor, ionotropic, N-methyl D-aspartate-like 1A (LOC498325), mRNA.	LOC498325	-1.27679
ILMN_1376680	Rattus norvegicus dystrophin, muscular dystrophy (Dmd), transcript variant Dp71c, mRNA.	Dmd	-1.27863
ILMN_1357336	Rattus norvegicus proteasome (prosome, macropain) subunit, beta type 3 (Psmb3), mRNA.	Psmb3	-1.28186
ILMN_1359126	PREDICTED: Rattus norvegicus protein regulator of cytokinesis 1 (predicted) (Prc1_predicted), mRNA.	Prc1_predicted	-1.28218
ILMN_1361310	PREDICTED: Rattus norvegicus similar to RIKEN cDNA 2510006C20 (RGD1309120), mRNA.	RGD1309120	-1.28218
ILMN_1370343	PREDICTED: Rattus norvegicus similar to Tpi1 protein (predicted) (RGD1563601_predicted), mRNA.	RGD1563601_predicted	-1.28307
ILMN_1363891	Rattus norvegicus translocase of inner mitochondrial membrane 8 homolog a1 (yeast) (Timm8a1), nuclear gene encoding mitochondrial protein, mRNA.	Timm8a1	-1.28388
ILMN_1354802	PREDICTED: Rattus norvegicus similar to Macrophage migration inhibitory factor (MIF) (Phenylpyruvate tautomerase) (Glycosylation-inhibiting factor) (GIF) (Delayed early response protein 6) (DER6) (LOC686548), mRNA.	LOC686548	-1.28503
ILMN_1376398	Rattus norvegicus basic helix-loop-helix domain containing, class B3 (Bhlhb3), mRNA.	Bhlhb3	-1.28585
ILMN_1354878	PREDICTED: Rattus norvegicus LSM7 homolog, U6 small nuclear RNA associated (S. cerevisiae) (predicted) (Lsm7_predicted), mRNA.	Lsm7_predicted	-1.28587
ILMN_1368822	Rattus norvegicus DnaJ (Hsp40) homolog, subfamily C, member 3 (Dnajc3), mRNA.	Dnajc3	-1.28765
ILMN_1365012	PREDICTED: Rattus norvegicus IMP (inosine monophosphate) dehydrogenase 1 (predicted) (Impdh1_predicted), mRNA.	Impdh1_predicted	-1.28769
ILMN_1359784	PREDICTED: Rattus norvegicus similar to RIKEN cDNA 9130404D14 (predicted) (LOC362115), mRNA.	LOC362115	-1.28817
ILMN_1356078	PREDICTED: Rattus norvegicus similar to glyceraldehyde-3-phosphate dehydrogenase (predicted) (RGD1559704_predicted), mRNA.	RGD1559704_predicted	-1.28934
ILMN_1650908	Rattus norvegicus G patch domain containing 4 (Gpatch4), mRNA.	Gpatch4	-1.29003
ILMN_1359024	Rattus norvegicus myeloid differentiation primary response gene 88 (Myd88), mRNA.	Myd88	-1.29038
ILMN_1363572	Rattus norvegicus O-6-methylguanine-DNA methyltransferase (Mgmt), mRNA.	Mgmt	-1.29111
ILMN_1352417	Rattus norvegicus brain protein 16 (Brp16), mRNA.	Brp16	-1.29184
ILMN_1363078	Rattus norvegicus proline-rich coiled-coil 1 (Prrc1), mRNA.	Prrc1	-1.29227
ILMN_1356500	PREDICTED: Rattus norvegicus similar to glyceraldehyde-3-phosphate dehydrogenase (phosphorylating) (EC 1.2.1.12) (predicted) (RGD1561821_predicted), mRNA.	RGD1561821_predicted	-1.29325
ILMN_1368872	PREDICTED: Rattus norvegicus exportin, tRNA (nuclear export receptor for tRNAs) (predicted) (Xpot_predicted), mRNA.	Xpot_predicted	-1.294
ILMN_1373499	PREDICTED: Rattus norvegicus cadherin 3, type 1, P-cadherin (placental) (Cdh3), mRNA.	Cdh3	-1.29667
ILMN_1356110	Rattus norvegicus Kruppel-like factor 4 (gut) (Klf4), mRNA.	Klf4	-1.29698
ILMN_1376738	Rattus norvegicus tryptophanyl-tRNA synthetase (Wars), mRNA.	Wars	-1.29865
ILMN_1358725	Rattus norvegicus neuropeptide W (Npw), mRNA.	Npw	-1.30042
ILMN_1368863	Rattus norvegicus mevalonate (diphospho) decarboxylase (Mvd), mRNA.	Mvd	-1.3006
ILMN_1650818	Rattus norvegicus triosephosphate isomerase 1 (Tpi1), mRNA.	Tpi1	-1.30178
ILMN_1363721	Rattus norvegicus translocase of inner mitochondrial membrane 8 homolog b (yeast) (Timm8b), mRNA.	Timm8b	-1.3041
ILMN_1357510	PREDICTED: Rattus norvegicus membrane-spanning 4-domains, subfamily A, member 7 (predicted) (Ms4a7_predicted), mRNA.	Ms4a7_predicted	-1.30466
ILMN_1366981	Rattus norvegicus ferritin light chain 1 (Ftl1), mRNA.	Ftl1	-1.3072
ILMN_1361826	Rattus norvegicus caspase 1 (Casp1), mRNA.	Casp1	-1.30796
ILMN_1366640	PREDICTED: Rattus norvegicus exosome component 3 (predicted) (Exosc3_predicted), mRNA.	Exosc3_predicted	-1.30811
ILMN_1355184	PREDICTED: Rattus norvegicus N-acetylneuraminic acid synthase (sialic acid synthase) (predicted) (Nans_predicted), mRNA.	Nans_predicted	-1.30904
ILMN_1361406	PREDICTED: Rattus norvegicus similar to Phosphoglycerate mutase 1 (Phosphoglycerate mutase isozyme B) (predicted) (RGD1563963_predicted), mRNA.	RGD1563963_predicted	-1.31137
ILMN_1372095	Rattus norvegicus interferon regulatory factor 1 (Irf1), mRNA.	Irf1	-1.31164
ILMN_1367380	Rattus norvegicus aldolase A (Aldoa), mRNA.	Aldoa	-1.31188
ILMN_1363480	PREDICTED: Rattus norvegicus sterol regulatory element binding factor 1 (Srebf1), mRNA.	Srebf1	-1.31195
ILMN_1358154	PREDICTED: Rattus norvegicus similar to stromal cell-derived factor 2-like 1 (LOC680945), mRNA.	LOC680945	-1.31225
ILMN_1363732	PREDICTED: Rattus norvegicus valyl-tRNA synthetase 2 (Vars2), mRNA.	Vars2	-1.31476
ILMN_1359468	PREDICTED: Rattus norvegicus 24-dehydrocholesterol reductase (Dhcr24), mRNA.	Dhcr24	-1.31558
ILMN_1375131	Rattus norvegicus PAK1 interacting protein 1 (Pak1ip1), mRNA.	Pak1ip1	-1.31906
ILMN_1363581	PREDICTED: Rattus norvegicus similar to WD repeat domain 36 (LOC688637), mRNA.	LOC688637	-1.31926
ILMN_1355190	PREDICTED: Rattus norvegicus stromal interaction molecule 2 (predicted) (Stim2_predicted), mRNA.	Stim2_predicted	-1.32298
ILMN_1368718	PREDICTED: Rattus norvegicus ChaC, cation transport regulator-like 1 (E. coli) (predicted) (Chac1_predicted), mRNA.	Chac1_predicted	-1.32351
ILMN_1362837	Rattus norvegicus galactokinase 1 (Galk1), mRNA.	Galk1	-1.32379
ILMN_2038894	Rattus norvegicus glutamyl-prolyl-tRNA synthetase (Eprs), mRNA.	Eprs	-1.32423
ILMN_1351485	Rattus norvegicus solute carrier family 39 (iron-regulated transporter), member 1 (Slc40a1), mRNA.	Slc40a1	-1.32523
ILMN_1360983	PREDICTED: Rattus norvegicus similar to B99 protein (predicted) (RGD1563164_predicted), mRNA.	RGD1563164_predicted	-1.32528
ILMN_1352342	Rattus norvegicus eukaryotic translation initiation factor 5 (Eif5), mRNA.	Eif5	-1.32657
ILMN_1361472	PREDICTED: Rattus norvegicus triosephosphate isomerase (LOC500959), mRNA.	LOC500959	-1.32741
ILMN_1371286	Rattus norvegicus Jun dimerization protein 2 (Jundm2), mRNA.	Jundm2	-1.32756
ILMN_1358108	Rattus norvegicus spermidine synthase (Srm), mRNA.	Srm	-1.32762
ILMN_1364814	PREDICTED: Rattus norvegicus similar to glyceraldehyde-3-phosphate dehydrogenase (LOC361841), mRNA.	LOC361841	-1.32816
ILMN_1368144	Rattus norvegicus caspase 11 (Casp11), mRNA.	Casp11	-1.32905
ILMN_1374586	PREDICTED: Rattus norvegicus similar to Pins (predicted) (RGD1560967_predicted), mRNA.	RGD1560967_predicted	-1.32932
ILMN_1354441	PREDICTED: Rattus norvegicus protein tyrosine phosphatase, receptor-type, F interacting protein, binding protein 2 (Ppfibp2), mRNA.	Ppfibp2	-1.32935
ILMN_1376726	Rattus norvegicus diacylglycerol O-acyltransferase 2 (Dgat2), mRNA.	Dgat2	-1.32948
ILMN_1373530	Rattus norvegicus cysteine-rich with EGF-like domains 2 (Creld2), mRNA.	Creld2	-1.33022
ILMN_1354116	PREDICTED: Rattus norvegicus pseudogene for diazepam binding inhibitor 1 (LOC301444), mRNA.	LOC301444	-1.33117
ILMN_1361446	PREDICTED: Rattus norvegicus similar to RIKEN cDNA 1810029B16 (predicted) (RGD1305222_predicted), mRNA.	RGD1305222_predicted	-1.33171
ILMN_1376991	Rattus norvegicus dihydroorotate dehydrogenase (Dhodh), nuclear gene encoding mitochondrial protein, mRNA.	Dhodh	-1.33255
ILMN_1362553	Rattus norvegicus hydroxysteroid (17-beta) dehydrogenase 10 (Hsd17b10), nuclear gene encoding mitochondrial protein, mRNA.	Hsd17b10	-1.33352
ILMN_1356539	Rattus norvegicus macrophage migration inhibitory factor (Mif), mRNA.	Mif	-1.3344
ILMN_1373964	Rattus norvegicus nucleolar protein 10 (Nol10), mRNA.	Nol10	-1.33535
ILMN_1376787	Rattus norvegicus pleckstrin homology-like domain, family A, member 3 (Phlda3), mRNA.	Phlda3	-1.33625
ILMN_1366903	PREDICTED: Rattus norvegicus ribosomal protein S6 kinase, polypeptide 4 (predicted) (Rps6ka4_predicted), mRNA.	Rps6ka4_predicted	-1.33693
ILMN_1651136	PREDICTED: Rattus norvegicus coiled-coil-helix-coiled-coil-helix domain containing 6 (predicted), transcript variant 1 (Chchd6_predicted), mRNA.	Chchd6_predicted	-1.33819
ILMN_1371773	PREDICTED: Rattus norvegicus CD248 antigen, endosialin (predicted) (Cd248_predicted), mRNA.	Cd248_predicted	-1.33897
ILMN_1371927	PREDICTED: Rattus norvegicus signal recognition particle 54 kDa (Srp54), mRNA.	Srp54	-1.33952
ILMN_1374906	PREDICTED: Rattus norvegicus similar to glyceraldehyde-3-phosphate dehydrogenase (predicted) (RGD1562758_predicted), mRNA.	RGD1562758_predicted	-1.34043
ILMN_1356564	Rattus norvegicus phenylalanyl-tRNA synthetase, beta subunit (Farsb), mRNA.	Farsb	-1.34269
ILMN_1351352	PREDICTED: Rattus norvegicus lysyl oxidase-like 2 (predicted) (Loxl2_predicted), mRNA.	Loxl2_predicted	-1.34404
ILMN_2039396	Rattus norvegicus NAD(P)H dehydrogenase, quinone 1 (Nqo1), mRNA.	Nqo1	-1.34731
ILMN_1349202	Rattus norvegicus 7-dehydrocholesterol reductase (Dhcr7), mRNA.	Dhcr7	-1.34733
ILMN_1362451	Rattus norvegicus regulator of G-protein signaling 2 (Rgs2), mRNA.	Rgs2	-1.34808
ILMN_1356458	Rattus norvegicus chloride intracellular channel 1 (Clic1), mRNA.	Clic1	-1.3496
ILMN_1349159	PREDICTED: Rattus norvegicus similar to proteasome (prosome, macropain) activator subunit 4 (LOC498433), mRNA.	LOC498433	-1.35075
ILMN_2038783	Rattus norvegicus thioredoxin 1 (Txn1), mRNA.	Txn1	-1.35117
ILMN_1354910	Rattus norvegicus aldo-keto reductase family 1, member B8 (Akr1b8), mRNA.	Akr1b8	-1.35138
ILMN_1353974	PREDICTED: Rattus norvegicus procollagen-proline, 2-oxoglutarate 4-dioxygenase (proline 4-hydroxylase), alpha II polypeptide (predicted) (P4ha2_predicted), mRNA.	P4ha2_predicted	-1.35209
ILMN_1364050	PREDICTED: Rattus norvegicus FK506 binding protein 2 (predicted) (Fkbp2_predicted), mRNA.	Fkbp2_predicted	-1.35227
ILMN_1363976	Rattus norvegicus adenylate kinase 2 (Ak2), transcript variant 1, mRNA.	Ak2	-1.35341
ILMN_1364363	PREDICTED: Rattus norvegicus ribosome binding protein 1 homolog 180kDa (dog) (predicted) (Rrbp1_predicted), mRNA.	Rrbp1_predicted	-1.35569
ILMN_1363059	PREDICTED: Rattus norvegicus similar to glyceraldehyde-3-phosphate dehydrogenase (predicted) (RGD1560797_predicted), mRNA.	RGD1560797_predicted	-1.35717
ILMN_1363216	Rattus norvegicus lon peptidase 1, mitochondrial (Lonp1), nuclear gene encoding mitochondrial protein, mRNA.	Lonp1	-1.35751
ILMN_1368770	PREDICTED: Rattus norvegicus HemK methyltransferase family member 2 (predicted) (Hemk2_predicted), mRNA.	Hemk2_predicted	-1.35765
ILMN_1370638	PREDICTED: Rattus norvegicus similar to Low affinity immunoglobulin gamma Fc region receptor III precursor (IgG Fc receptor III) (Fc-gamma RIII) (FcRIII) (LOC498277), mRNA.	LOC498277	-1.358
ILMN_1361040	PREDICTED: Rattus norvegicus similar to RIKEN cDNA 2310008M10 (predicted) (RGD1560708_predicted), mRNA.	RGD1560708_predicted	-1.35807
ILMN_1356892	Rattus norvegicus BCL2/adenovirus E1B 19 kDa-interacting protein 3 (Bnip3), nuclear gene encoding mitochondrial protein, mRNA.	Bnip3	-1.35897
ILMN_1367094	PREDICTED: Rattus norvegicus zinc finger protein 511 (predicted) (Znf511_predicted), mRNA.	Znf511_predicted	-1.35956
ILMN_1357676	Rattus norvegicus arginase 2 (Arg2), mRNA.	Arg2	-1.35958
ILMN_1349756	Rattus norvegicus similar to hypothetical protein (RGD1310571), mRNA.	RGD1310571	-1.3617
ILMN_1650535	PREDICTED: Rattus norvegicus similar to TR4 orphan receptor associated protein TRA16 (LOC361128), mRNA.	LOC361128	-1.36184
ILMN_1355235	Rattus norvegicus fatty acid desaturase 1 (Fads1), mRNA.	Fads1	-1.36507
ILMN_1352701	Rattus norvegicus lumican (Lum), mRNA.	Lum	-1.36889
ILMN_1376357	Rattus norvegicus aminoacylase 1 (Acy1), mRNA.	Acy1	-1.37003
ILMN_1358746	PREDICTED: Rattus norvegicus similar to ATP synthase lipid-binding protein, mitochondrial precursor (ATP synthase proteolipid P1) (predicted) (RGD1563463_predicted), mRNA.	RGD1563463_predicted	-1.3723
ILMN_1349457	PREDICTED: Rattus norvegicus similar to glyceraldehyde-3-phosphate dehydrogenase (phosphorylating) (EC 1.2.1.12) - mouse (LOC502770), mRNA.	LOC502770	-1.37661
ILMN_2040770	PREDICTED: Rattus norvegicus similar to glyceraldehyde-3-phosphate dehydrogenase (predicted) (RGD1560826_predicted), mRNA.	RGD1560826_predicted	-1.37833
ILMN_1370077	PREDICTED: Rattus norvegicus similar to ribosomal protein L27a (LOC308719), mRNA.	LOC308719	-1.37995
ILMN_1350154	PREDICTED: Rattus norvegicus thioesterase superfamily member 2 (predicted) (Them2_predicted), mRNA.	Them2_predicted	-1.38049
ILMN_1358849	PREDICTED: Rattus norvegicus LOC501211 (LOC501211), mRNA.	LOC501211	-1.38166
ILMN_1370868	Rattus norvegicus homocysteine-inducible, endoplasmic reticulum stress-inducible, ubiquitin-like domain member 1 (Herpud1), mRNA.	Herpud1	-1.38291
ILMN_1376507	Rattus norvegicus ribonuclease P 25 subunit (human) (Rpp25), mRNA.	Rpp25	-1.38445
ILMN_1371515	PREDICTED: Rattus norvegicus growth arrest and DNA-damage-inducible, gamma interacting protein 1 (Gadd45gip1), mRNA.	Gadd45gip1	-1.38527
ILMN_1356886	PREDICTED: Rattus norvegicus similar to Glyceraldehyde-3-phosphate dehydrogenase (GAPDH) (LOC500104), mRNA.	LOC500104	-1.38532
ILMN_1364918	Rattus norvegicus cytochrome P450, subfamily 51 (Cyp51), mRNA.	Cyp51	-1.3858
ILMN_1357604	Rattus norvegicus heat shock protein, alpha-crystallin-related, B6 (Hspb6), mRNA.	Hspb6	-1.38612
ILMN_1365272	Rattus norvegicus solute carrier family 6 (neurotransmitter transporter, taurine), member 6 (Slc6a6), mRNA.	Slc6a6	-1.38713
ILMN_1530502	PREDICTED: Rattus norvegicus similar to Glucosylceramidase precursor (Beta-glucocerebrosidase) (Acid beta-glucosidase) (D-glucosyl-N-acylsphingosine glucohydrolase), transcript variant 1 (LOC684536), mRNA.	LOC684536	-1.39418
ILMN_1368515	Rattus norvegicus calreticulin (Calr), mRNA.	Calr	-1.39984
ILMN_1650254	PREDICTED: Rattus norvegicus similar to BCL2/adenovirus E1B 19 kDa-interacting protein 3 (predicted) (RGD1565371_predicted), mRNA.	RGD1565371_predicted	-1.40145
ILMN_1353625	Rattus norvegicus similar to RIKEN cDNA 2310061F22 (LOC292069), mRNA.	LOC292069	-1.40851
ILMN_1363139	PREDICTED: Rattus norvegicus similar to macrophage migration inhibitory factor (LOC364048), mRNA.	LOC364048	-1.40982
ILMN_1369074	Rattus norvegicus phosphoglycerate kinase 1 (Pgk1), mRNA.	Pgk1	-1.41272
ILMN_1361079	PREDICTED: Rattus norvegicus hypothetical gene supported by NM_031049 (LOC497745), mRNA.	LOC497745	-1.41363
ILMN_1649859	Rattus norvegicus glyceraldehyde-3-phosphate dehydrogenase (Gapdh), mRNA.	Gapdh	-1.41389
ILMN_1352014	PREDICTED: Rattus norvegicus osteoglycin (predicted), transcript variant 3 (Ogn_predicted), mRNA.	Ogn_predicted	-1.4194
ILMN_1650285	Rattus norvegicus heme oxygenase (decycling) 1 (Hmox1), mRNA.	Hmox1	-1.42021
ILMN_1353269	PREDICTED: Rattus norvegicus similar to L-lactate dehydrogenase A chain (LDH-A) (LDH muscle subunit) (LDH-M) (predicted) (RGD1562690_predicted), mRNA.	RGD1562690_predicted	-1.4208
ILMN_1355544	PREDICTED: Rattus norvegicus similar to Fc gamma (IgG) receptor II (low affinity) alpha precursor - rat (LOC498276), mRNA.	LOC498276	-1.42103
ILMN_1369945	PREDICTED: Rattus norvegicus similar to glyceraldehyde-3-phosphate dehydrogenase (phosphorylating) (EC 1.2.1.12) (predicted) (RGD1563464_predicted), mRNA.	RGD1563464_predicted	-1.42105
ILMN_1356719	Rattus norvegicus choline kinase alpha (Chka), mRNA.	Chka	-1.42147
ILMN_1375860	PREDICTED: Rattus norvegicus ribosomal protein, large P2 (Rplp2), mRNA.	Rplp2	-1.42486
ILMN_1355155	PREDICTED: Rattus norvegicus alanyl-tRNA synthetase (Aars), mRNA.	Aars	-1.42688
ILMN_1350695	PREDICTED: Rattus norvegicus proteasome (prosome, macropain) 26S subunit, non-ATPase, 13 (predicted) (Psmd13_predicted), mRNA.	Psmd13_predicted	-1.4328
ILMN_1373595	Rattus norvegicus cell division cycle 20 homolog (S. cerevisiae) (Cdc20), mRNA.	Cdc20	-1.43281
ILMN_1372752	PREDICTED: Rattus norvegicus similar to RIKEN cDNA 1110007C09 (predicted) (RGD1306058_predicted), mRNA.	RGD1306058_predicted	-1.43514
ILMN_1651054	PREDICTED: Rattus norvegicus similar to Bifunctional methylenetetrahydrofolate dehydrogenase/cyclohydrolase, mitochondrial precursor, transcript variant 2 (LOC684490), mRNA.	LOC684490	-1.44232
ILMN_1369105	Rattus norvegicus sarcoglycan, gamma (dystrophin-associated glycoprotein) (Sgcg), mRNA.	Sgcg	-1.44457
ILMN_1356085	PREDICTED: Rattus norvegicus similar to chromosome 13 open reading frame 12 (predicted) (LOC288455), mRNA.	LOC288455	-1.44734
ILMN_1360721	PREDICTED: Rattus norvegicus similar to RIKEN cDNA D630035O19 (predicted) (RGD1311100_predicted), mRNA.	RGD1311100_predicted	-1.45457
ILMN_1367954	Rattus norvegicus DEAD (Asp-Glu-Ala-Asp) box polypeptide 39 (Ddx39), mRNA.	Ddx39	-1.4587
ILMN_1370230	PREDICTED: Rattus norvegicus similar to macrophage migration inhibitory factor (predicted) (RGD1560513_predicted), mRNA.	RGD1560513_predicted	-1.46376
ILMN_1368610	Rattus norvegicus GTP cyclohydrolase I feedback regulator (Gchfr), mRNA.	Gchfr	-1.46703
ILMN_1358103	Rattus norvegicus threonyl-tRNA synthetase (Tars), mRNA.	Tars	-1.4672
ILMN_1361286	Rattus norvegicus peptidylprolyl isomerase D (cyclophilin D) (Ppid), mRNA.	Ppid	-1.46973
ILMN_1354330	PREDICTED: Rattus norvegicus monoamine oxidase A (Maoa), mRNA.	Maoa	-1.47352
ILMN_1370840	Rattus norvegicus lectin, galactose binding, soluble 3 (Lgals3), mRNA.	Lgals3	-1.47474
ILMN_1366169	PREDICTED: Rattus norvegicus similar to glyceraldehyde-3-phosphate dehydrogenase (predicted) (RGD1565891_predicted), mRNA.	RGD1565891_predicted	-1.48092
ILMN_1650784	Rattus norvegicus growth arrest and DNA-damage-inducible 45 alpha (Gadd45a), mRNA.	Gadd45a	-1.48171
ILMN_1366201	Rattus norvegicus aldolase A (Aldoa), mRNA.	Aldoa	-1.483
ILMN_1356091	Rattus norvegicus EBNA1 binding protein 2 (Ebna1bp2), mRNA.	Ebna1bp2	-1.49785
ILMN_1353378	PREDICTED: Rattus norvegicus similar to Macrophage migration inhibitory factor (MIF) (predicted) (RGD1560376_predicted), mRNA.	RGD1560376_predicted	-1.49816
ILMN_1356375	Rattus norvegicus leucyl-tRNA synthetase (Lars), mRNA.	Lars	-1.50207
ILMN_1354240	Rattus norvegicus receptor-interacting serine-threonine kinase 3 (Ripk3), mRNA.	Ripk3	-1.50535
ILMN_1360379	PREDICTED: Rattus norvegicus similar to Glyceraldehyde-3-phosphate dehydrogenase (GAPDH) (predicted) (RGD1565137_predicted), mRNA.	RGD1565137_predicted	-1.51041
ILMN_1357015	Rattus norvegicus solute carrier family 6 (neurotransmitter transporter, glycine), member 9 (Slc6a9), mRNA.	Slc6a9	-1.51299
ILMN_1351656	Rattus norvegicus decorin (Dcn), mRNA.	Dcn	-1.51351
ILMN_1366334	PREDICTED: Rattus norvegicus isoleucine-tRNA synthetase (predicted) (Iars_predicted), mRNA.	Iars_predicted	-1.51589
ILMN_1375179	Rattus norvegicus adenylate kinase 3-like 1 (Ak3l1), mRNA.	Ak3l1	-1.52105
ILMN_1357966	Rattus norvegicus 3-phosphoglycerate dehydrogenase (Phgdh), mRNA.	Phgdh	-1.52621
ILMN_1363488	Rattus norvegicus TSC22 domain family 3 (Tsc22d3), mRNA.	Tsc22d3	-1.52788
ILMN_1364112	PREDICTED: Rattus norvegicus lactate dehydrogenase A (Ldha), mRNA.	Ldha	-1.53008
ILMN_1367523	Rattus norvegicus lectin, galactose binding, soluble 1 (Lgals1), mRNA.	Lgals1	-1.53184
ILMN_1352034	PREDICTED: Rattus norvegicus similar to glyceraldehyde-3-phosphate dehydrogenase (predicted) (RGD1560581_predicted), mRNA.	RGD1560581_predicted	-1.53746
ILMN_1367312	PREDICTED: Rattus norvegicus phosphoenolpyruvate carboxykinase 2 (mitochondrial) (predicted) (Pck2_predicted), mRNA.	Pck2_predicted	-1.54367
ILMN_1374895	PREDICTED: Rattus norvegicus biliverdin reductase B (flavin reductase (NADPH)) (predicted) (Blvrb_predicted), mRNA.	Blvrb_predicted	-1.54544
ILMN_1351094	Rattus norvegicus seryl-aminoacyl-tRNA synthetase (Sars), mRNA.	Sars	-1.5475
ILMN_1372377	Rattus norvegicus solute carrier family 3 (activators of dibasic and neutral amino acid transport), member 2 (Slc3a2), mRNA.	Slc3a2	-1.55144
ILMN_1364841	PREDICTED: Rattus norvegicus methylenetetrahydrofolate dehydrogenase (NADP+ dependent) 1-like (predicted) (Mthfd1l_predicted), mRNA.	Mthfd1l_predicted	-1.55683
ILMN_1349342	PREDICTED: Rattus norvegicus glycyl-tRNA synthetase (Gars), mRNA.	Gars	-1.56313
ILMN_1351105	PREDICTED: Rattus norvegicus nicotinamide N-methyltransferase (predicted) (Nnmt_predicted), mRNA.	Nnmt_predicted	-1.56444
ILMN_1372198	PREDICTED: Rattus norvegicus similar to Histone H2A.1 (predicted) (RGD1562827_predicted), mRNA.	RGD1562827_predicted	-1.56865
ILMN_1367580	PREDICTED: Rattus norvegicus similar to L-lactate dehydrogenase A chain (LDH-A) (LDH muscle subunit) (LDH-M) (predicted) (RGD1564026_predicted), mRNA.	RGD1564026_predicted	-1.56956
ILMN_1355142	PREDICTED: Rattus norvegicus triosephosphate isomerase (LOC500959), mRNA.	LOC500959	-1.57299
ILMN_1374056	PREDICTED: Rattus norvegicus similar to glyceraldehyde-3-phosphate dehydrogenase (LOC365954), mRNA.	LOC365954	-1.5737
ILMN_1365463	Rattus norvegicus enolase 3, beta (Eno3), mRNA.	Eno3	-1.57393
ILMN_1366126	PREDICTED: Rattus norvegicus similar to methylenetetrahydrofolate dehydrogenase (NAD) (EC 1.5.1.15)/methenyltetrahydrofolate cyclohydrolase (EC 3.5.4.9) precursor (predicted) (RGD1564040_predicted), mRNA.	RGD1564040_predicted	-1.60644
ILMN_1375100	Rattus norvegicus activating transcription factor 4 (Atf4), mRNA.	Atf4	-1.6118
ILMN_1372842	PREDICTED: Rattus norvegicus cysteinyl-tRNA synthetase (predicted) (Cars_predicted), mRNA.	Cars_predicted	-1.62641
ILMN_1353028	PREDICTED: Rattus norvegicus hypothetical gene supported by NM_053806 (LOC497732), mRNA.	LOC497732	-1.63222
ILMN_1374544	Rattus norvegicus asparaginyl-tRNA synthetase (Nars), mRNA.	Nars	-1.63348
ILMN_1361396	PREDICTED: Rattus norvegicus procollagen, type 1, alpha 1 (Col1a1), mRNA.	Col1a1	-1.63994
ILMN_1374460	Rattus norvegicus tyrosyl-tRNA synthetase (Yars), mRNA.	Yars	-1.67912
ILMN_1649739	PREDICTED: Rattus norvegicus pyrroline-5-carboxylate synthetase (glutamate gamma-semialdehyde synthetase) (predicted) (Pycs_predicted), mRNA.	Pycs_predicted	-1.71057
ILMN_1353239	Rattus norvegicus eukaryotic translation initiation factor 4E binding protein 1 (Eif4ebp1), mRNA.	Eif4ebp1	-1.72176
ILMN_1368060	PREDICTED: Rattus norvegicus similar to L-lactate dehydrogenase A chain (LDH-A) (LDH muscle subunit) (LDH-M) (LOC307731), mRNA.	LOC307731	-1.75827
ILMN_1354070	PREDICTED: Rattus norvegicus putative ISG12(b) protein (isg12(b)), mRNA.	isg12(b)	-1.77895
ILMN_1357483	Rattus norvegicus cAMP responsive element binding protein 3-like 1 (Creb3l1), mRNA.	Creb3l1	-1.78633
ILMN_1359586	Rattus norvegicus stearoyl-Coenzyme A desaturase 2 (Scd2), mRNA.	Scd2	-1.82336
ILMN_1349221	Rattus norvegicus tribbles homolog 3 (Drosophila) (Trib3), mRNA.	Trib3	-1.82769
ILMN_1374191	Rattus norvegicus stearoyl-Coenzyme A desaturase 1 (Scd1), mRNA.	Scd1	-1.83151
ILMN_1349910	Rattus norvegicus DNA-damage inducible transcript 3 (Ddit3), mRNA.	Ddit3	-1.88796
ILMN_1368671	Rattus norvegicus serine hydroxymethyltransferase 2 (mitochondrial) (Shmt2), nuclear gene encoding mitochondrial protein, mRNA.	Shmt2	-2.07557
ILMN_1359736	Rattus norvegicus activating transcription factor 5 (Atf5), mRNA.	Atf5	-2.20461
ILMN_1353230	PREDICTED: Rattus norvegicus hypothetical gene supported by NM_031815 (LOC497821), mRNA.	LOC497821	-2.2116
ILMN_1365729	Rattus norvegicus solute carrier family 7 (cationic amino acid transporter, y+ system), member 5 (Slc7a5), mRNA.	Slc7a5	-2.26515
ILMN_1357747	Rattus norvegicus DNA-damage-inducible transcript 4 (Ddit4), mRNA.	Ddit4	-2.29048
ILMN_1358252	Rattus norvegicus phosphoserine phosphatase (Psph), mRNA.	Psph	-2.41866
ILMN_1354048	Rattus norvegicus nuclear protein 1 (Nupr1), mRNA.	Nupr1	-2.98998

## Sheet: H5D
H5D Cells
Illumina Probe ID	Gene Title	Gene Symbol	FoldChange
ILMN_1364113	Rattus norvegicus connective tissue growth factor (Ctgf), mRNA.	Ctgf	2.77515
ILMN_1361666	Rattus norvegicus matrix metallopeptidase 3 (Mmp3), mRNA.	Mmp3	1.8633
ILMN_1376388	Rattus norvegicus caveolin, caveolae protein 1 (Cav1), transcript variant 2, mRNA.	Cav1	1.82696
ILMN_1357730	Rattus norvegicus neuropeptide Y (Npy), mRNA.	Npy	1.76906
ILMN_1357041	Rattus norvegicus Purkinje cell protein 4 (Pcp4), mRNA.	Pcp4	1.74377
ILMN_1371619	PREDICTED: Rattus norvegicus kelch repeat and BTB (POZ) domain containing 9 (predicted) (Kbtbd9_predicted), mRNA.	Kbtbd9_predicted	1.73619
ILMN_1372740	PREDICTED: Rattus norvegicus procollagen, type XV (Col15a1), mRNA.	Col15a1	1.7236
ILMN_1350180	Rattus norvegicus epithelial membrane protein 1 (Emp1), mRNA.	Emp1	1.71412
ILMN_1352307	Rattus norvegicus peptidase D (Pepd), mRNA.	Pepd	1.65912
ILMN_1362451	Rattus norvegicus regulator of G-protein signaling 2 (Rgs2), mRNA.	Rgs2	1.61342
ILMN_1355544	PREDICTED: Rattus norvegicus similar to Fc gamma (IgG) receptor II (low affinity) alpha precursor - rat (LOC498276), mRNA.	LOC498276	1.59161
ILMN_1356793	Rattus norvegicus coagulation factor III (F3), mRNA.	F3	1.56292
ILMN_1370638	PREDICTED: Rattus norvegicus similar to Low affinity immunoglobulin gamma Fc region receptor III precursor (IgG Fc receptor III) (Fc-gamma RIII) (FcRIII) (LOC498277), mRNA.	LOC498277	1.53618
ILMN_1362987	Rattus norvegicus hepatocyte growth factor activator (Hgfac), mRNA.	Hgfac	1.51997
ILMN_1369005	Rattus norvegicus early growth response 1 (Egr1), mRNA.	Egr1	1.50138
ILMN_1374391	PREDICTED: Rattus norvegicus ras homolog gene family, member C (predicted) (Rhoc_predicted), mRNA.	Rhoc_predicted	1.49163
ILMN_1354206	Rattus norvegicus tubulin, alpha 1A (Tuba1a), mRNA.	Tuba1a	1.48873
ILMN_1372967	Rattus norvegicus lysosomal-associated protein transmembrane 4A (Laptm4a), mRNA.	Laptm4a	1.48125
ILMN_1355751	PREDICTED: Rattus norvegicus zinc finger protein 523 (predicted) (Zfp523_predicted), mRNA.	Zfp523_predicted	1.48009
ILMN_1352782	Rattus norvegicus tripeptidyl peptidase I (Tpp1), mRNA.	Tpp1	1.47481
ILMN_1353579	Rattus norvegicus similar to RIKEN cDNA 5730469M10 (RGD1309676), mRNA.	RGD1309676	1.47331
ILMN_1363231	Rattus norvegicus endothelin 1 (Edn1), mRNA.	Edn1	1.47012
ILMN_1354695	Rattus norvegicus immunoglobulin (CD79A) binding protein 1 (Igbp1), mRNA.	Igbp1	1.46974
ILMN_1366080	PREDICTED: Rattus norvegicus similar to Gene model 609 (predicted) (RGD1563727_predicted), mRNA.	RGD1563727_predicted	1.45874
ILMN_1359028	PREDICTED: Rattus norvegicus similar to RIKEN cDNA 2410018M08 (predicted) (RGD1559988_predicted), mRNA.	RGD1559988_predicted	1.45843
ILMN_1367049	Rattus norvegicus phytanoyl-CoA dioxygenase domain containing 1 (Phyhd1), mRNA.	Phyhd1	1.45763
ILMN_1376249	Rattus norvegicus transferrin (Trf), mRNA.	Trf	1.4539
ILMN_1368086	Rattus norvegicus insulin-like growth factor binding protein 7 (Igfbp7), mRNA.	Igfbp7	1.44868
ILMN_1368002	PREDICTED: Rattus norvegicus sorting nexin associated golgi protein 1 (predicted) (Snag1_predicted), mRNA.	Snag1_predicted	1.4347
ILMN_1364899	PREDICTED: Rattus norvegicus procollagen, type XVIII, alpha 1 (Col18a1), mRNA.	Col18a1	1.43217
ILMN_1356122	Rattus norvegicus src homology 2 domain-containing transforming protein C1 (Shc1), mRNA.	Shc1	1.41755
ILMN_1354897	PREDICTED: Rattus norvegicus Janus kinase 1 (Jak1), mRNA.	Jak1	1.41748
ILMN_1371388	Rattus norvegicus polyadenylate-binding protein interacting protein 2 (Paip2), mRNA.	Paip2	1.41547
ILMN_1365634	Rattus norvegicus serine incorporator 3 (Serinc3), mRNA.	Serinc3	1.41009
ILMN_1362763	PREDICTED: Rattus norvegicus similar to Sulfide:quinone oxidoreductase, mitochondrial precursor (LOC691966), mRNA.	LOC691966	1.40898
ILMN_1360894	Rattus norvegicus coiled-coil domain containing 90B (Ccdc90b), mRNA.	Ccdc90b	1.40778
ILMN_1372343	Rattus norvegicus leptin receptor overlapping transcript-like 1 (Leprotl1), mRNA.	Leprotl1	1.40675
ILMN_1369440	Rattus norvegicus TERF1 (TRF1)-interacting nuclear factor 2 (Tinf2), mRNA.	Tinf2	1.40641
ILMN_1362122	Rattus norvegicus threonine synthase-like 2 (bacterial) (Thnsl2), mRNA.	Thnsl2	1.40626
ILMN_1375203	Rattus norvegicus protein tyrosine phosphatase 4a1 (Ptp4a1), mRNA.	Ptp4a1	1.40229
ILMN_1364908	PREDICTED: Rattus norvegicus transmembrane, prostate androgen induced RNA (predicted) (Tmepai_predicted), mRNA.	Tmepai_predicted	1.40112
ILMN_1349811	Rattus norvegicus RAB11a, member RAS oncogene family (Rab11a), mRNA.	Rab11a	1.39453
ILMN_1349449	Rattus norvegicus HtrA serine peptidase 1 (Htra1), mRNA.	Htra1	1.38869
ILMN_1360255	PREDICTED: Rattus norvegicus similar to Aig1 protein (predicted) (RGD1562920_predicted), mRNA.	RGD1562920_predicted	1.38858
ILMN_1352583	Rattus norvegicus asialoglycoprotein receptor 1 (Asgr1), mRNA.	Asgr1	1.38787
ILMN_1370549	Rattus norvegicus matrix-remodelling associated 8 (Mxra8), mRNA.	Mxra8	1.38599
ILMN_1372107	Rattus norvegicus nitric oxide synthase 2, inducible (Nos2), mRNA.	Nos2	1.38424
ILMN_1350385	Rattus norvegicus transmembrane protein 150 (Tmem150), mRNA.	Tmem150	1.3837
ILMN_1358773	PREDICTED: Rattus norvegicus gap junction membrane channel protein alpha 5 (Gja5), mRNA.	Gja5	1.38288
ILMN_1355336	Rattus norvegicus similar to RIKEN cDNA 1110003E01 (RGD1311122), mRNA.	RGD1311122	1.38266
ILMN_1374454	PREDICTED: Rattus norvegicus similar to protein 4.1G (LOC309557), mRNA.	LOC309557	1.38186
ILMN_1365332	Rattus norvegicus beta galactoside alpha 2,6 sialyltransferase 1 (St6gal1), mRNA.	St6gal1	1.37976
ILMN_1372285	PREDICTED: Rattus norvegicus similar to RIKEN cDNA 1300002A08 (RGD1305466), mRNA.	RGD1305466	1.37565
ILMN_1373266	Rattus norvegicus integral membrane protein 2B (Itm2b), mRNA.	Itm2b	1.3702
ILMN_1363769	Rattus norvegicus transmembrane emp24 domain containing 3 (Tmed3), mRNA.	Tmed3	1.36712
ILMN_1350201	PREDICTED: Rattus norvegicus reversion-inducing-cysteine-rich protein with kazal motifs (predicted) (Reck_predicted), mRNA.	Reck_predicted	1.36697
ILMN_1355110	Rattus norvegicus F-box and leucine-rich repeat protein 20 (Fbxl20), mRNA.	Fbxl20	1.36628
ILMN_1361562	Rattus norvegicus ST3 beta-galactoside alpha-2,3-sialyltransferase 4 (St3gal4), mRNA.	St3gal4	1.36531
ILMN_1354046	Rattus norvegicus ATP-binding cassette, sub-family G (WHITE), member 1 (Abcg1), mRNA.	Abcg1	1.36115
ILMN_1360078	PREDICTED: Rattus norvegicus similar to RIKEN cDNA 5830475I06 (predicted) (RGD1311744_predicted), mRNA.	RGD1311744_predicted	1.35981
ILMN_1360823	Rattus norvegicus hydroxysteroid (17-beta) dehydrogenase 4 (Hsd17b4), mRNA.	Hsd17b4	1.35759
ILMN_1353162	PREDICTED: Rattus norvegicus transmembrane protein 50A (predicted) (Tmem50a_predicted), mRNA.	Tmem50a_predicted	1.3559
ILMN_1356949	PREDICTED: Rattus norvegicus procollagen, type VI, alpha 1 (predicted) (Col6a1_predicted), mRNA.	Col6a1_predicted	1.35572
ILMN_1368049	Rattus norvegicus Rab acceptor 1 (prenylated) (Rabac1), mRNA.	Rabac1	1.35425
ILMN_1370628	Rattus norvegicus golgi autoantigen, golgin subfamily a, 5 (Golga5), mRNA.	Golga5	1.34833
ILMN_1353540	Rattus norvegicus cytochrome P450, family 4, subfamily b, polypeptide 1 (Cyp4b1), mRNA.	Cyp4b1	1.3464
ILMN_1361318	Rattus norvegicus matrix metallopeptidase 16 (Mmp16), mRNA.	Mmp16	1.34265
ILMN_1358824	PREDICTED: Rattus norvegicus SWI/SNF related, matrix associated, actin dependent regulator of chromatin, subfamily a, member 1 (predicted) (Smarca1_predicted), mRNA.	Smarca1_predicted	1.34251
ILMN_1350497	Rattus norvegicus WD repeat domain 45 (Wdr45), mRNA.	Wdr45	1.33933
ILMN_1370461	PREDICTED: Rattus norvegicus similar to Pygopus homolog 2 (predicted) (RGD1308535_predicted), mRNA.	RGD1308535_predicted	1.3393
ILMN_1357776	Rattus norvegicus caldesmon 1 (Cald1), mRNA.	Cald1	1.33902
ILMN_1355561	Rattus norvegicus cystatin C (Cst3), mRNA.	Cst3	1.33902
ILMN_1368559	PREDICTED: Rattus norvegicus melanoma inhibitory activity 1 (Mia1), mRNA.	Mia1	1.33899
ILMN_1373397	PREDICTED: Rattus norvegicus Eph receptor A2 (predicted) (Epha2_predicted), mRNA.	Epha2_predicted	1.33871
ILMN_1351367	PREDICTED: Rattus norvegicus ring finger protein 7 (predicted) (Rnf7_predicted), mRNA.	Rnf7_predicted	1.33863
ILMN_1356423	PREDICTED: Rattus norvegicus synaptotagmin-like 2 (predicted) (Sytl2_predicted), mRNA.	Sytl2_predicted	1.3386
ILMN_1372650	Rattus norvegicus Yip1 domain family, member 4 (Yipf4), mRNA.	Yipf4	1.33729
ILMN_1375111	Rattus norvegicus eukaryotic translation elongation factor 2 (Eef2), mRNA.	Eef2	1.33667
ILMN_1349299	Rattus norvegicus vesicle-associated membrane protein 5 (Vamp5), mRNA.	Vamp5	1.3353
ILMN_1371005	PREDICTED: Rattus norvegicus cell cycle progression 1 (predicted), transcript variant 3 (Ccpg1_predicted), mRNA.	Ccpg1_predicted	1.3349
ILMN_1356716	Rattus norvegicus protein kinase C, delta binding protein (Prkcdbp), mRNA.	Prkcdbp	1.33483
ILMN_1358399	PREDICTED: Rattus norvegicus similar to small EDRK-rich factor 1 (predicted) (RGD1565105_predicted), mRNA.	RGD1565105_predicted	1.33404
ILMN_1367877	PREDICTED: Rattus norvegicus Fc receptor, IgG, low affinity III (Fcgr3), mRNA.	Fcgr3	1.33383
ILMN_1352808	PREDICTED: Rattus norvegicus laminin, beta 1 (predicted) (Lamb1_predicted), mRNA.	Lamb1_predicted	1.33378
ILMN_1372487	PREDICTED: Rattus norvegicus similar to chromosome 9 open reading frame 7 (predicted) (LOC296599), mRNA.	LOC296599	1.33349
ILMN_1358691	Rattus norvegicus myeloid-associated differentiation marker (Myadm), mRNA.	Myadm	1.33339
ILMN_1360040	PREDICTED: Rattus norvegicus nudix (nucleoside diphosphate linked moiety X)-type motif 14 (predicted) (Nudt14_predicted), mRNA.	Nudt14_predicted	1.33226
ILMN_1356588	PREDICTED: Rattus norvegicus keratin complex 2, basic, gene 7 (Krt2-7), mRNA.	Krt2-7	1.33042
ILMN_1376410	Rattus norvegicus RNA binding motif, single stranded interacting protein 1 (Rbms1), mRNA.	Rbms1	1.33041
ILMN_1363020	Rattus norvegicus protein tyrosine phosphatase, receptor type, N (Ptprn), mRNA.	Ptprn	1.33018
ILMN_1373909	PREDICTED: Rattus norvegicus aminopeptidase-like 1 (predicted) (Npepl1_predicted), mRNA.	Npepl1_predicted	1.32775
ILMN_1357874	PREDICTED: Rattus norvegicus similar to osmosis responsive factor (predicted) (RGD1564042_predicted), mRNA.	RGD1564042_predicted	1.3272
ILMN_1366665	PREDICTED: Rattus norvegicus similar to RIKEN cDNA 0610012D17 (LOC498095), mRNA.	LOC498095	1.32694
ILMN_1352122	Rattus norvegicus Niemann Pick type C2 (Npc2), mRNA.	Npc2	1.32647
ILMN_1357304	PREDICTED: Rattus norvegicus similar to RIKEN cDNA 2310016C16 (predicted) (RGD1307506_predicted), mRNA.	RGD1307506_predicted	1.3262
ILMN_1355977	Rattus norvegicus glyoxalase 1 (Glo1), mRNA.	Glo1	1.32562
ILMN_1362410	Rattus norvegicus ribonuclease, RNase A family 4 (Rnase4), mRNA.	Rnase4	1.32545
ILMN_1357859	PREDICTED: Rattus norvegicus kelch domain containing 8A (Klhdc8a), mRNA.	Klhdc8a	1.32487
ILMN_1371270	Rattus norvegicus G protein-coupled receptor 56 (Gpr56), mRNA.	Gpr56	1.32431
ILMN_1364053	Rattus norvegicus solute carrier family 27 (fatty acid transporter), member 1 (Slc27a1), mRNA.	Slc27a1	1.32419
ILMN_1372152	PREDICTED: Rattus norvegicus development and differentiation enhancing (predicted) (Ddef1_predicted), mRNA.	Ddef1_predicted	1.32412
ILMN_1368194	PREDICTED: Rattus norvegicus similar to Tribbles homolog 2 (predicted) (RGD1564451_predicted), mRNA.	RGD1564451_predicted	1.32408
ILMN_1649927	Rattus norvegicus transmembrane protein 106C (Tmem106c), mRNA.	Tmem106c	1.32388
ILMN_1375522	Rattus norvegicus chondroitin sulfate proteoglycan 5 (Cspg5), transcript variant 1, mRNA.	Cspg5	1.32357
ILMN_1365841	PREDICTED: Rattus norvegicus myosin, heavy polypeptide 14 (Myh14), mRNA.	Myh14	1.32198
ILMN_1350355	PREDICTED: Rattus norvegicus similar to PABP-dependent poly(A) nuclease 3 (LOC360760), mRNA.	LOC360760	1.32063
ILMN_1375793	PREDICTED: Rattus norvegicus similar to transmembrane 6 superfamily member 2 (LOC684448), mRNA.	LOC684448	1.32017
ILMN_1358127	Rattus norvegicus plasminogen activator, tissue (Plat), mRNA.	Plat	1.31995
ILMN_1374546	Rattus norvegicus keratin 8 (Krt8), mRNA.	Krt8	1.31759
ILMN_1353549	Rattus norvegicus related RAS viral (r-ras) oncogene homolog 2 (Rras2), mRNA.	Rras2	1.31655
ILMN_1355034	Rattus norvegicus cardiotrophin-like cytokine factor 1 (Clcf1), mRNA.	Clcf1	1.31648
ILMN_1372690	PREDICTED: Rattus norvegicus cytochrome b-561 (predicted) (Cyb561_predicted), mRNA.	Cyb561_predicted	1.31598
ILMN_1367232	PREDICTED: Rattus norvegicus similar to RIKEN cDNA 6330406I15 (predicted) (RGD1307396_predicted), mRNA.	RGD1307396_predicted	1.31448
ILMN_1350504	PREDICTED: Rattus norvegicus histidine triad nucleotide binding protein 3 (Hint3), mRNA.	Hint3	1.31168
ILMN_1360747	PREDICTED: Rattus norvegicus COMM domain containing 3 (Commd3), mRNA.	Commd3	1.3097
ILMN_1372512	PREDICTED: Rattus norvegicus similar to 60S ribosomal protein L29 (P23) (predicted) (RGD1559877_predicted), mRNA.	RGD1559877_predicted	1.30821
ILMN_1367003	PREDICTED: Rattus norvegicus cytochrome c oxidase subunit VIIa polypeptide 2 like (predicted) (Cox7a2l_predicted), mRNA.	Cox7a2l_predicted	1.30813
ILMN_1356668	PREDICTED: Rattus norvegicus LOC361774 (predicted) (RGD1306116_predicted), mRNA.	RGD1306116_predicted	1.30793
ILMN_1365255	Rattus norvegicus ectonucleotide pyrophosphatase/phosphodiesterase 1 (Enpp1), mRNA.	Enpp1	1.30708
ILMN_1650955	PREDICTED: Rattus norvegicus interferon, alpha-inducible protein 27-like (Ifi27l), mRNA.	Ifi27l	1.30637
ILMN_1373097	PREDICTED: Rattus norvegicus ERGIC and golgi 3 (predicted) (Ergic3_predicted), mRNA.	Ergic3_predicted	1.30433
ILMN_1361650	PREDICTED: Rattus norvegicus similar to protein containing single MORN motif in testis (predicted) (RGD1563988_predicted), mRNA.	RGD1563988_predicted	1.30304
ILMN_1356340	Rattus norvegicus wingless-related MMTV integration site 5A (Wnt5a), mRNA.	Wnt5a	1.30273
ILMN_1356153	PREDICTED: Rattus norvegicus similar to hypothetical protein MGC5528 (predicted) (RGD1561749_predicted), mRNA.	RGD1561749_predicted	1.30244
ILMN_1362033	PREDICTED: Rattus norvegicus procollagen, type VIII, alpha 1 (predicted) (Col8a1_predicted), mRNA.	Col8a1_predicted	1.30025
ILMN_1361781	Rattus norvegicus signal recognition particle receptor ('docking protein') (Srpr), mRNA.	Srpr	1.30002
ILMN_1376796	Rattus norvegicus ring finger protein 166 (Rnf166), mRNA.	Rnf166	1.29899
ILMN_1358198	PREDICTED: Rattus norvegicus endothelial differentiation-related factor 1 (predicted) (Edf1_predicted), mRNA.	Edf1_predicted	1.29835
ILMN_1368291	PREDICTED: Rattus norvegicus similar to ribosomal protein L5 (predicted) (RGD1565286_predicted), mRNA.	RGD1565286_predicted	1.29739
ILMN_1361704	PREDICTED: Rattus norvegicus similar to homeotic protein Hox B5 - mouse (predicted) (RGD1562292_predicted), mRNA.	RGD1562292_predicted	1.29718
ILMN_1368575	Rattus norvegicus leucine-rich repeat LGI family, member 4 (Lgi4), mRNA.	Lgi4	1.29711
ILMN_1371753	PREDICTED: Rattus norvegicus coagulation factor 5 (mapped) (F5_mapped), mRNA.	F5_mapped	1.29692
ILMN_1349419	Rattus norvegicus stathmin 1 (Stmn1), mRNA.	Stmn1	1.29685
ILMN_1372351	Rattus norvegicus cholinergic receptor, nicotinic, beta polypeptide 1 (muscle) (Chrnb1), mRNA.	Chrnb1	1.29515
ILMN_1358074	Rattus norvegicus neural proliferation, differentiation and control, 1 (Npdc1), mRNA.	Npdc1	1.29426
ILMN_2038896	Rattus norvegicus interferon activated gene 204 (Ifi204), mRNA.	Ifi204	1.29287
ILMN_1376361	Rattus norvegicus T-cell immunomodulatory protein (Cda08), mRNA.	Cda08	1.29197
ILMN_1352448	PREDICTED: Rattus norvegicus similar to 60S acidic ribosomal protein P1 (predicted) (RGD1565054_predicted), mRNA.	RGD1565054_predicted	1.29124
ILMN_1351309	Rattus norvegicus nephroblastoma overexpressed gene (Nov), mRNA.	Nov	1.29115
ILMN_1350794	PREDICTED: Rattus norvegicus polymerase I and transcript release factor (predicted) (Ptrf_predicted), mRNA.	Ptrf_predicted	1.29093
ILMN_1359800	PREDICTED: Rattus norvegicus LIM and cysteine-rich domains 1 (predicted) (Lmcd1_predicted), mRNA.	Lmcd1_predicted	1.29087
ILMN_1348991	PREDICTED: Rattus norvegicus similar to RIKEN cDNA 1110003E01 (predicted) (RGD1564372_predicted), mRNA.	RGD1564372_predicted	1.2896
ILMN_1351737	Rattus norvegicus potassium channel tetramerisation domain containing 13 (Kctd13), mRNA.	Kctd13	1.28945
ILMN_1353637	Rattus norvegicus cysteine sulfinic acid decarboxylase (Csad), mRNA.	Csad	1.28912
ILMN_1371101	Rattus norvegicus similar to RIKEN cDNA 4933411K20 (RGD1307325), mRNA.	RGD1307325	1.28883
ILMN_1372744	Rattus norvegicus EH-domain containing 2 (Ehd2), mRNA.	Ehd2	1.28871
ILMN_1352443	Rattus norvegicus C-terminal binding protein 2 (Ctbp2), mRNA.	Ctbp2	1.28826
ILMN_1366361	Rattus norvegicus fasciculation and elongation protein zeta 2 (zygin II) (Fez2), mRNA.	Fez2	1.28814
ILMN_1365485	Rattus norvegicus platelet derived growth factor, alpha (Pdgfa), mRNA.	Pdgfa	1.28604
ILMN_1651100	Rattus norvegicus similar to RIKEN cDNA 5730457F11 (RGD1304601), mRNA.	RGD1304601	1.28599
ILMN_1366023	Rattus norvegicus chemokine (C-C motif) ligand 7 (Ccl7), mRNA.	Ccl7	1.2853
ILMN_1350234	PREDICTED: Rattus norvegicus F-box and WD-40 domain protein 4 (predicted) (Fbxw4_predicted), mRNA.	Fbxw4_predicted	1.28412
ILMN_1352752	Rattus norvegicus catenin (cadherin associated protein), beta 1 (Ctnnb1), mRNA.	Ctnnb1	1.28347
ILMN_1353238	PREDICTED: Rattus norvegicus similar to NAD(P)H dehydrogenase, quinone 2 (LOC365555), mRNA.	LOC365555	1.28251
ILMN_1375214	PREDICTED: Rattus norvegicus ribose 5-phosphate isomerase A (predicted) (Rpia_predicted), mRNA.	Rpia_predicted	1.28211
ILMN_1354735	PREDICTED: Rattus norvegicus similar to 60S ribosomal protein L12 (predicted) (RGD1563956_predicted), mRNA.	RGD1563956_predicted	1.28197
ILMN_1369372	PREDICTED: Rattus norvegicus WD repeat domain, phosphoinositide interacting 1 (predicted), transcript variant 2 (Wipi1_predicted), mRNA.	Wipi1_predicted	1.28163
ILMN_1368262	Rattus norvegicus fumarylacetoacetate hydrolase domain containing 1 (Fahd1), nuclear gene encoding mitochondrial protein, mRNA.	Fahd1	1.28076
ILMN_1651045	Rattus norvegicus microtubule-associated protein 1 light chain 3 alpha (Map1lc3a), mRNA.	Map1lc3a	1.27946
ILMN_1649832	PREDICTED: Rattus norvegicus lysophospholipase-like 1 (predicted) (Lyplal1_predicted), mRNA.	Lyplal1_predicted	1.27919
ILMN_1362230	PREDICTED: Rattus norvegicus nerve growth factor, beta (mapped) (Ngfb_mapped), mRNA.	Ngfb_mapped	1.27869
ILMN_1376437	Rattus norvegicus zinc finger, AN1-type domain 3 (Zfand3), mRNA.	Zfand3	1.27838
ILMN_2040763	PREDICTED: Rattus norvegicus septin 6 (predicted) (Sept6_predicted), mRNA.	Sept6_predicted	1.27772
ILMN_1374973	PREDICTED: Rattus norvegicus Rho GTPase activating protein 1 (predicted) (Arhgap1_predicted), mRNA.	Arhgap1_predicted	1.27728
ILMN_1351608	PREDICTED: Rattus norvegicus Tnf receptor associated factor 4 (predicted) (Traf4_predicted), mRNA.	Traf4_predicted	1.27719
ILMN_1372699	PREDICTED: Rattus norvegicus spermatogenesis associated 5 (predicted) (Spata5_predicted), mRNA.	Spata5_predicted	1.2761
ILMN_1363266	Rattus norvegicus ribosomal protein L13A (Rpl13a), mRNA.	Rpl13a	1.27474
ILMN_1650541	PREDICTED: Rattus norvegicus similar to Protein C14orf101 homolog (predicted) (RGD1562018_predicted), mRNA.	RGD1562018_predicted	1.27429
ILMN_1349559	PREDICTED: Rattus norvegicus Kruppel-like factor 7 (ubiquitous) (predicted) (Klf7_predicted), mRNA.	Klf7_predicted	1.27358
ILMN_1364641	Rattus norvegicus T-cell leukemia translocation altered gene (Tcta), mRNA.	Tcta	1.27305
ILMN_1368380	Rattus norvegicus N-acylsphingosine amidohydrolase 1 (Asah1), mRNA.	Asah1	1.27297
ILMN_1361362	PREDICTED: Rattus norvegicus scavenger receptor class F, member 2 (predicted) (Scarf2_predicted), mRNA.	Scarf2_predicted	1.27151
ILMN_1352296	PREDICTED: Rattus norvegicus LOC500840 (LOC500840), mRNA.	LOC500840	1.27124
ILMN_1348927	Rattus norvegicus thromboxane A synthase 1, platelet (Tbxas1), mRNA.	Tbxas1	1.27124
ILMN_1356188	PREDICTED: Rattus norvegicus similar to aldo-keto reductase family 1, member C12 (predicted) (RGD1562954_predicted), mRNA.	RGD1562954_predicted	1.27065
ILMN_1369511	PREDICTED: Rattus norvegicus breast cancer anti-estrogen resistance 3 (predicted) (Bcar3_predicted), mRNA.	Bcar3_predicted	1.26998
ILMN_1374967	Rattus norvegicus interferon, alpha-inducible protein 27-like (Ifi27l), mRNA.	Ifi27l	1.26952
ILMN_1359195	PREDICTED: Rattus norvegicus ribonuclease T2 (predicted) (Rnaset2_predicted), mRNA.	Rnaset2_predicted	1.26943
ILMN_1359295	Rattus norvegicus serine/threonine/tyrosine interacting-like 1 (Styxl1), mRNA.	Styxl1	1.26915
ILMN_1650870	Rattus norvegicus putative UA20 protein (Ua20), mRNA.	Ua20	1.26821
ILMN_1349839	Rattus norvegicus high mobility group AT-hook 2 (Hmga2), mRNA.	Hmga2	1.26735
ILMN_1376269	Rattus norvegicus zinc finger protein 513 (Zfp513), mRNA.	Zfp513	1.26565
ILMN_1364160	PREDICTED: Rattus norvegicus v-abl Abelson murine leukemia viral oncogene homolog 1 (mapped) (Abl1_mapped), mRNA.	Abl1_mapped	1.26482
ILMN_1349721	PREDICTED: Rattus norvegicus chromodomain protein, Y chromosome-like 2 (predicted) (Cdyl2_predicted), mRNA.	Cdyl2_predicted	1.26471
ILMN_1370925	PREDICTED: Rattus norvegicus similar to RIKEN cDNA E030034P13 (predicted) (RGD1309385_predicted), mRNA.	RGD1309385_predicted	1.26429
ILMN_1350993	PREDICTED: Rattus norvegicus similar to p53-associated parkin-like cytoplasmic protein (predicted) (RGD1562008_predicted), mRNA.	RGD1562008_predicted	1.26417
ILMN_1376802	Rattus norvegicus ectodermal-neural cortex 1 (Enc1), mRNA.	Enc1	1.26318
ILMN_1650508	PREDICTED: Rattus norvegicus similar to ribosomal protein S19 (LOC503110), mRNA.	LOC503110	1.26316
ILMN_1352778	PREDICTED: Rattus norvegicus similar to hypothetical protein 9930016O13 (predicted) (RGD1309983_predicted), mRNA.	RGD1309983_predicted	1.2631
ILMN_1355883	Rattus norvegicus tumor necrosis factor, alpha-induced protein 1 (endothelial) (Tnfaip1), mRNA.	Tnfaip1	1.26237
ILMN_1350714	PREDICTED: Rattus norvegicus oxidation resistance 1 (Oxr1), mRNA.	Oxr1	1.26211
ILMN_1368610	Rattus norvegicus GTP cyclohydrolase I feedback regulator (Gchfr), mRNA.	Gchfr	1.26209
ILMN_1364579	Rattus norvegicus guanine nucleotide binding protein, alpha inhibiting 3 (Gnai3), mRNA.	Gnai3	1.26198
ILMN_1352604	PREDICTED: Rattus norvegicus similar to hypothetical protein (predicted) (RGD1561019_predicted), mRNA.	RGD1561019_predicted	1.26196
ILMN_1367523	Rattus norvegicus lectin, galactose binding, soluble 1 (Lgals1), mRNA.	Lgals1	1.26188
ILMN_1363808	Rattus norvegicus Ssu72 RNA polymerase II CTD phosphatase homolog (yeast) (Ssu72), mRNA.	Ssu72	1.26159
ILMN_1371755	Rattus norvegicus ankyrin repeat and sterile alpha motif domain containing 3 (Anks3), mRNA.	Anks3	1.2604
ILMN_1353912	Rattus norvegicus ubiquitin D (Ubd), mRNA.	Ubd	1.26013
ILMN_1351695	PREDICTED: Rattus norvegicus ankyrin repeat and SOCS box-containing protein 8 (predicted) (Asb8_predicted), mRNA.	Asb8_predicted	1.25966
ILMN_1362377	Rattus norvegicus death-associated protein (Dap), mRNA.	Dap	1.25947
ILMN_1650482	Rattus norvegicus Nedd4 family interacting protein 1 (Ndfip1), mRNA.	Ndfip1	1.25942
ILMN_1371243	Rattus norvegicus phospholipase C, delta 1 (Plcd1), mRNA.	Plcd1	1.25881
ILMN_1363841	Rattus norvegicus mitochondrial ribosomal protein L23 (Mrpl23), nuclear gene encoding mitochondrial protein, mRNA.	Mrpl23	1.2579
ILMN_1376502	Rattus norvegicus tumor necrosis factor ligand superfamily member 12 (Tnfsf12), mRNA.	Tnfsf12	1.25786
ILMN_1356357	PREDICTED: Rattus norvegicus RGD1562012 (predicted) (RGD1562012_predicted), mRNA.	RGD1562012_predicted	1.25649
ILMN_1358918	Rattus norvegicus serine incorporator 1 (Serinc1), mRNA.	Serinc1	1.25607
ILMN_1530353	AGENCOURT_31479076 NIH_MGC_251 Rattus norvegicus cDNA clone IMAGE:7385236 5', mRNA		1.25591
ILMN_1348906	Rattus norvegicus myosin ID (Myo1d), mRNA.	Myo1d	1.25493
ILMN_1360596	Rattus norvegicus Sjogren syndrome antigen B (Ssb), mRNA.	Ssb	1.25489
ILMN_1650161	PREDICTED: Rattus norvegicus hypothetical gene supported by NM_152844 (LOC497669), mRNA.	LOC497669	1.25452
ILMN_1357093	Rattus norvegicus tropomyosin 4 (Tpm4), mRNA.	Tpm4	1.25423
ILMN_1359890	Rattus norvegicus cholinergic receptor, nicotinic, beta polypeptide 4 (Chrnb4), mRNA.	Chrnb4	1.25404
ILMN_1350852	Rattus norvegicus RDCR-0918-3 protein (LOC246120), mRNA.	LOC246120	1.25396
ILMN_1374774	Rattus norvegicus presenilin enhancer 2 homolog (C. elegans) (Psenen), mRNA.	Psenen	1.25307
ILMN_1650805	PREDICTED: Rattus norvegicus similar to RIKEN cDNA 1110003E01 (LOC364253), mRNA.	LOC364253	1.25303
ILMN_1353445	PREDICTED: Rattus norvegicus CTTNBP2 N-terminal like (predicted) (Cttnbp2nl_predicted), mRNA.	Cttnbp2nl_predicted	1.25301
ILMN_1352407	PREDICTED: Rattus norvegicus similar to KIAA1913 (LOC498987), mRNA.	LOC498987	1.2527
ILMN_1353023	Rattus norvegicus prostaglandin F2 receptor negative regulator (Ptgfrn), mRNA.	Ptgfrn	1.25169
ILMN_1367165	Rattus norvegicus peptidyl arginine deiminase, type II (Padi2), mRNA.	Padi2	1.25119
ILMN_1351285	Rattus norvegicus ras homolog gene family, member B (Rhob), mRNA.	Rhob	1.25066
ILMN_1361515	Rattus norvegicus myosin phosphatase-Rho interacting protein (M-rip), transcript variant 2, mRNA.	M-rip	1.25043
ILMN_1366815	PREDICTED: Rattus norvegicus similar to Homeobox protein Hox-D8 (Hox-4.3) (Hox-5.4) (LOC366083), mRNA.	LOC366083	1.25041
ILMN_1351436	PREDICTED: Rattus norvegicus similar to crossveinless 2 CG15671-PA (LOC501231), mRNA.	LOC501231	1.25007
ILMN_1367683	PREDICTED: Rattus norvegicus similar to acetyl-coA dehydrogenase -related (111.6 kD) (5G231) (predicted) (LOC304500), mRNA.	LOC304500	1.24955
ILMN_1356932	Rattus norvegicus RhoA/RAC/CDC42 exchange factor (Geft), mRNA.	Geft	1.24901
ILMN_1349337	PREDICTED: Rattus norvegicus pumilio 2 (Drosophila) (Pum2), mRNA.	Pum2	1.2468
ILMN_1354187	Rattus norvegicus lanC (bacterial lantibiotic synthetase component C)-like 1 (Lancl1), mRNA.	Lancl1	1.24656
ILMN_1353531	Rattus norvegicus mitogen-activated protein kinase 6 (Mapk6), mRNA.	Mapk6	1.24643
ILMN_1367447	Rattus norvegicus family with sequence similarity 110, member C (Fam110c), mRNA.	Fam110c	1.24629
ILMN_1362834	Rattus norvegicus dual specificity phosphatase 6 (Dusp6), mRNA.	Dusp6	1.24503
ILMN_1374468	Rattus norvegicus caveolin 2 (Cav2), mRNA.	Cav2	1.24457
ILMN_1366377	Rattus norvegicus mal, T-cell differentiation protein 2 (Mal2), mRNA.	Mal2	1.24436
ILMN_1350117	Rattus norvegicus Fc receptor, IgG, alpha chain transporter (Fcgrt), mRNA.	Fcgrt	1.24384
ILMN_1351536	Rattus norvegicus F11 receptor (F11r), mRNA.	F11r	1.24383
ILMN_1363917	Rattus norvegicus pre-B-cell colony enhancing factor 1 (Pbef1), mRNA.	Pbef1	1.24338
ILMN_1361375	PREDICTED: Rattus norvegicus proline rich 7 (Prr7), mRNA.	Prr7	1.24337
ILMN_1369946	Rattus norvegicus zinc finger protein 238 (Zfp238), mRNA.	Zfp238	1.2426
ILMN_1349172	PREDICTED: Rattus norvegicus similar to BC003940 protein (predicted) (RGD1311925_predicted), mRNA.	RGD1311925_predicted	1.24202
ILMN_1349851	Rattus norvegicus cytidine monophosphate (UMP-CMP) kinase 1, cytosolic (Cmpk1), mRNA.	Cmpk1	1.24196
ILMN_1356637	Rattus norvegicus Ras homolog enriched in brain like 1 (Rhebl1), mRNA.	Rhebl1	1.24192
ILMN_1357622	Rattus norvegicus calpain, small subunit 1 (Capns1), mRNA.	Capns1	1.24135
ILMN_1357658	Rattus norvegicus WD repeat and SOCS box-containing 1 (Wsb1), transcript variant 2, mRNA.	Wsb1	1.24061
ILMN_2040234	PREDICTED: Rattus norvegicus leprecan-like 2 (predicted) (Leprel2_predicted), mRNA.	Leprel2_predicted	1.23999
ILMN_1371513	Rattus norvegicus glucosidase, alpha, acid (Gaa), mRNA.	Gaa	1.23985
ILMN_1362266	Rattus norvegicus extracellular matrix protein 1 (Ecm1), mRNA.	Ecm1	1.23914
ILMN_1349717	Rattus norvegicus sperm autoantigenic protein 17 (Spa17), mRNA.	Spa17	1.23856
ILMN_1350333	PREDICTED: Rattus norvegicus zinc finger protein 637 (Zfp637), mRNA.	Zfp637	1.23856
ILMN_1374732	PREDICTED: Rattus norvegicus similar to 4632407F12Rik protein (predicted) (LOC310615), mRNA.	LOC310615	1.23843
ILMN_1364072	PREDICTED: Rattus norvegicus coatomer protein complex, subunit zeta 1 (predicted) (Copz1_predicted), mRNA.	Copz1_predicted	1.23836
ILMN_1362050	PREDICTED: Rattus norvegicus similar to hypothetical protein A330042H22 (predicted) (RGD1563994_predicted), mRNA.	RGD1563994_predicted	1.23797
ILMN_1369989	Rattus norvegicus apolipoprotein O-like (Apool), mRNA.	Apool	1.23771
ILMN_1353251	Rattus norvegicus telomerase associated protein 1 (Tep1), mRNA.	Tep1	1.23706
ILMN_1365336	PREDICTED: Rattus norvegicus colony stimulating factor 2 (granulocyte-macrophage) (Csf2), mRNA.	Csf2	1.23688
ILMN_1371607	Rattus norvegicus solute carrier family 1 (neuronal/epithelial high affinity glutamate transporter, system Xag), member 1 (Slc1a1), mRNA.	Slc1a1	1.2359
ILMN_1370452	Rattus norvegicus signal transducing adaptor family member 2 (Stap2), mRNA.	Stap2	1.23562
ILMN_1369980	PREDICTED: Rattus norvegicus chemokine (C-X-C motif) ligand 5 (Cxcl5), mRNA.	Cxcl5	1.23485
ILMN_1376327	Rattus norvegicus SH2B adaptor protein 3 (Sh2b3), mRNA.	Sh2b3	1.23467
ILMN_1358225	Rattus norvegicus similar to RIKEN cDNA 1110005A03 (RGD1306284), mRNA.	RGD1306284	1.2338
ILMN_1365702	PREDICTED: Rattus norvegicus pantothenate kinase 2 (Hallervorden-Spatz syndrome) (predicted) (Pank2_predicted), mRNA.	Pank2_predicted	1.23374
ILMN_1352635	Rattus norvegicus etoposide induced 2.4 mRNA (Ei24), mRNA.	Ei24	1.23373
ILMN_1376297	Rattus norvegicus retinol dehydrogenase 14 (all-trans and 9-cis) (Rdh14), mRNA.	Rdh14	1.2337
ILMN_1349633	PREDICTED: Rattus norvegicus zinc finger protein 358 (predicted) (Zfp358_predicted), mRNA.	Zfp358_predicted	1.2333
ILMN_1371113	Rattus norvegicus chemokine (C-X3-C motif) ligand 1 (Cx3cl1), mRNA.	Cx3cl1	1.23321
ILMN_1352410	Rattus norvegicus proenkephalin 1 (Penk1), mRNA.	Penk1	1.23284
ILMN_1368928	PREDICTED: Rattus norvegicus ankyrin repeat domain 50 (predicted) (Ankrd50_predicted), mRNA.	Ankrd50_predicted	1.23274
ILMN_1376524	Rattus norvegicus solute carrier family 10, member 2 (Slc10a2), mRNA.	Slc10a2	1.23219
ILMN_1350792	PREDICTED: Rattus norvegicus similar to PHD finger protein 20-like 1 isoform 1 (LOC314964), mRNA.	LOC314964	1.2321
ILMN_1354679	PREDICTED: Rattus norvegicus a disintegrin-like and metallopeptidase (reprolysin type) with thrombospondin type 1 motif, 7 (predicted) (Adamts7_predicted), mRNA.	Adamts7_predicted	1.23206
ILMN_1367615	PREDICTED: Rattus norvegicus splA/ryanodine receptor domain and SOCS box containing 1 (predicted) (Spsb1_predicted), mRNA.	Spsb1_predicted	1.23162
ILMN_1651137	PREDICTED: Rattus norvegicus biogenesis of lysosome-related organelles complex-1, subunit 1 (predicted) (Bloc1s1_predicted), mRNA.	Bloc1s1_predicted	1.23078
ILMN_1372071	PREDICTED: Rattus norvegicus tumor protein p53 inducible protein 11 (predicted), transcript variant 1 (Tp53i11_predicted), mRNA.	Tp53i11_predicted	1.23008
ILMN_1360861	PREDICTED: Rattus norvegicus zinc finger protein 532 (predicted) (Znf532_predicted), mRNA.	Znf532_predicted	1.23007
ILMN_1355779	PREDICTED: Rattus norvegicus hypothetical gene supported by NM_134416 (LOC497691), mRNA.	LOC497691	1.22919
ILMN_1360518	PREDICTED: Rattus norvegicus Harvey rat sarcoma oncogene, subgroup R (predicted) (Rras_predicted), mRNA.	Rras_predicted	1.22916
ILMN_1370878	Rattus norvegicus CD38 antigen (Cd38), mRNA.	Cd38	1.22905
ILMN_1363659	PREDICTED: Rattus norvegicus TAP binding protein-like (predicted) (Tapbpl_predicted), mRNA.	Tapbpl_predicted	1.22847
ILMN_1353188	Rattus norvegicus lysine-rich coiled-coil 1 (Krcc1), mRNA.	Krcc1	1.2278
ILMN_1371021	Rattus norvegicus oxidative stress responsive gene (RGD1303142), mRNA.	RGD1303142	1.22712
ILMN_1351083	PREDICTED: Rattus norvegicus transmembrane protein 14A (predicted) (Tmem14a_predicted), mRNA.	Tmem14a_predicted	1.22645
ILMN_1351793	PREDICTED: Rattus norvegicus integrin, alpha 6, transcript variant 4 (Itga6), mRNA.	Itga6	1.22575
ILMN_1362579	Rattus norvegicus SMT3 suppressor of mif two 3 homolog 1 (yeast) (Sumo1), mRNA.	Sumo1	1.22565
ILMN_1352908	PREDICTED: Rattus norvegicus similar to Ski protein (predicted) (RGD1565591_predicted), mRNA.	RGD1565591_predicted	1.22541
ILMN_1366612	PREDICTED: Rattus norvegicus mitogen activated protein kinase 3 (Mapk3), mRNA.	Mapk3	1.22531
ILMN_1356828	Rattus norvegicus arginase 1 (Arg1), mRNA.	Arg1	1.22489
ILMN_1358269	PREDICTED: Rattus norvegicus similar to Antxr2 protein (LOC305633), mRNA.	LOC305633	1.2244
ILMN_1650728	Rattus norvegicus KDEL (Lys-Asp-Glu-Leu) endoplasmic reticulum protein retention receptor 1 (Kdelr1), mRNA.	Kdelr1	1.22425
ILMN_1349516	Rattus norvegicus ST3 beta-galactoside alpha-2,3-sialyltransferase 2 (St3gal2), mRNA.	St3gal2	1.22363
ILMN_1376918	Rattus norvegicus cell adhesion molecule JCAM (LOC304000), mRNA.	LOC304000	1.22356
ILMN_2040901	PREDICTED: Rattus norvegicus schwannomin interacting protein 1 (Schip1), mRNA.	Schip1	1.22268
ILMN_1364744	PREDICTED: Rattus norvegicus hypothetical LOC294942 (LOC294942), mRNA.	LOC294942	1.2225
ILMN_1374203	PREDICTED: Rattus norvegicus cholinergic receptor, nicotinic, alpha polypeptide 3 (Chrna3), mRNA.	Chrna3	1.22196
ILMN_1356800	Rattus norvegicus calcium binding and coiled coil domain 1 (Calcoco1), mRNA.	Calcoco1	1.22183
ILMN_1372371	Rattus norvegicus coagulation factor II (thrombin) receptor (F2r), mRNA.	F2r	1.22115
ILMN_1367799	PREDICTED: Rattus norvegicus similar to hypothetical protein MGC19604 (predicted) (RGD1561264_predicted), mRNA.	RGD1561264_predicted	1.22091
ILMN_1650963	PREDICTED: Rattus norvegicus hypothetical protein LOC685888, transcript variant 2 (LOC685888), mRNA.	LOC685888	1.22061
ILMN_1371618	Rattus norvegicus pleckstrin homology-like domain, family A, member 1 (Phlda1), mRNA.	Phlda1	1.21884
ILMN_1372095	Rattus norvegicus interferon regulatory factor 1 (Irf1), mRNA.	Irf1	1.21866
ILMN_1372572	Rattus norvegicus peroxisome proliferator activated receptor gamma (Pparg), mRNA.	Pparg	1.21865
ILMN_1368903	Rattus norvegicus ribosomal protein L31 (Rpl31), mRNA.	Rpl31	1.21836
ILMN_1373687	PREDICTED: Rattus norvegicus similar to chondroitin beta1,4 N-acetylgalactosaminyltransferase (predicted), transcript variant 3 (RGD1307618_predicted), mRNA.	RGD1307618_predicted	1.21779
ILMN_1352205	Rattus norvegicus aldehyde dehydrogenase family 1, subfamily A3 (Aldh1a3), mRNA.	Aldh1a3	1.21731
ILMN_1372547	PREDICTED: Rattus norvegicus F-box only protein 4 (predicted) (Fbxo4_predicted), mRNA.	Fbxo4_predicted	1.21667
ILMN_1650883	PREDICTED: Rattus norvegicus similar to RIKEN cDNA 1110003E01 (predicted) (RGD1561956_predicted), mRNA.	RGD1561956_predicted	1.21616
ILMN_1359642	Rattus norvegicus UDP-N-acetyl-alpha-D-galactosamine:polypeptide N-acetylgalactosaminyltransferase 11 (Galnt11), mRNA.	Galnt11	1.21615
ILMN_1371416	PREDICTED: Rattus norvegicus recombination activating gene 1 activating protein 1 (predicted) (Rag1ap1_predicted), mRNA.	Rag1ap1_predicted	1.216
ILMN_1362303	PREDICTED: Rattus norvegicus VPS10 domain receptor protein SORCS 1 (predicted) (Sorcs1_predicted), mRNA.	Sorcs1_predicted	1.21574
ILMN_1364769	PREDICTED: Rattus norvegicus similar to Protein C21orf58 (predicted) (RGD1307288_predicted), mRNA.	RGD1307288_predicted	1.21573
ILMN_1352930	Rattus norvegicus echinoderm microtubule associated protein like 2 (Eml2), mRNA.	Eml2	1.21543
ILMN_1372688	PREDICTED: Rattus norvegicus similar to hypothetical protein FLJ31951 (predicted) (RGD1309561_predicted), mRNA.	RGD1309561_predicted	1.2153
ILMN_1363137	Rattus norvegicus coilin (Coil), mRNA.	Coil	1.21514
ILMN_1360769	PREDICTED: Rattus norvegicus zyg-11 homolog B (C. elegans)-like, transcript variant 2 (Zyg11bl), mRNA.	Zyg11bl	1.21498
ILMN_1373883	Rattus norvegicus S100 calcium binding protein A11 (calizzarin) (S100a11), mRNA.	S100a11	1.21393
ILMN_1368604	PREDICTED: Rattus norvegicus similar to Hypothetical protein LOC270802 (predicted) (RGD1565498_predicted), mRNA.	RGD1565498_predicted	1.21331
ILMN_1357312	Rattus norvegicus myeloid cell leukemia sequence 1 (Mcl1), mRNA.	Mcl1	1.2131
ILMN_1355794	PREDICTED: Rattus norvegicus similar to fatty acid translocase/CD36 (predicted) (RGD1562323_predicted), mRNA.	RGD1562323_predicted	1.21302
ILMN_1372599	PREDICTED: Rattus norvegicus similar to Endoplasmic reticulum mannosyl-oligosaccharide 1,2-alpha-mannosidase (ER alpha-1,2-mannosidase) (predicted) (RGD1563595_predicted), mRNA.	RGD1563595_predicted	1.21291
ILMN_1363624	PREDICTED: Rattus norvegicus similar to RIKEN cDNA 3110001D03 (predicted) (RGD1309148_predicted), mRNA.	RGD1309148_predicted	1.21281
ILMN_1350489	Rattus norvegicus hyaluronoglucosaminidase 2 (Hyal2), mRNA.	Hyal2	1.21262
ILMN_1352338	Rattus norvegicus discoidin domain receptor family, member 1 (Ddr1), mRNA.	Ddr1	1.21241
ILMN_1350770	Rattus norvegicus sodium channel, voltage-gated, type III, beta (Scn3b), mRNA.	Scn3b	1.2121
ILMN_1374246	PREDICTED: Rattus norvegicus similar to Phosphatidylinositol glycan, class F (LOC500614), mRNA.	LOC500614	1.2119
ILMN_1358257	Rattus norvegicus polymerase (DNA-directed), delta 4 (Pold4), mRNA.	Pold4	1.21167
ILMN_1373384	PREDICTED: Rattus norvegicus desmuslin, transcript variant 2 (Dmn), mRNA.	Dmn	1.21125
ILMN_1351387	PREDICTED: Rattus norvegicus similar to tumor protein, translationally-controlled 1 (predicted) (RGD1565798_predicted), mRNA.	RGD1565798_predicted	1.2107
ILMN_1375676	PREDICTED: Rattus norvegicus neuralized-like 2 (Drosophila) (predicted) (Neurl2_predicted), mRNA.	Neurl2_predicted	1.21038
ILMN_1650535	PREDICTED: Rattus norvegicus similar to TR4 orphan receptor associated protein TRA16 (LOC361128), mRNA.	LOC361128	1.21035
ILMN_1370544	Rattus norvegicus tubulin, beta 5 (Tubb5), mRNA.	Tubb5	1.20992
ILMN_1352826	Rattus norvegicus phosphopantothenoylcysteine synthetase (Ppcs), mRNA.	Ppcs	1.20982
ILMN_1372828	PREDICTED: Rattus norvegicus bromodomain containing 4 (Brd4), mRNA.	Brd4	1.20891
ILMN_1372583	PREDICTED: Rattus norvegicus poly A binding protein, cytoplasmic 4 (predicted) (Pabpc4_predicted), mRNA.	Pabpc4_predicted	1.20839
ILMN_1357363	PREDICTED: Rattus norvegicus nucleotide binding protein-like (predicted) (Nubpl_predicted), mRNA.	Nubpl_predicted	1.20836
ILMN_1372790	Rattus norvegicus similar to Sec1 family domain containing protein 2 (Syntaxin binding protein 1-like 1) (Neuronal Sec1) (LOC498353), mRNA.	LOC498353	1.20821
ILMN_1363682	PREDICTED: Rattus norvegicus solute carrier family 16 (monocarboxylic acid transporters), member 11 (predicted) (Slc16a11_predicted), mRNA.	Slc16a11_predicted	1.20813
ILMN_1361139	Rattus norvegicus transmembrane protease, serine 8 (intestinal) (Tmprss8), mRNA.	Tmprss8	1.20797
ILMN_1349966	PREDICTED: Rattus norvegicus centrin 2 (Cetn2), mRNA.	Cetn2	1.20779
ILMN_1357137	PREDICTED: Rattus norvegicus LPS-induced TN factor (Litaf), mRNA.	Litaf	1.20699
ILMN_1373888	PREDICTED: Rattus norvegicus histidine triad nucleotide binding protein 2 (predicted) (Hint2_predicted), mRNA.	Hint2_predicted	1.2063
ILMN_1372236	Rattus norvegicus zinc finger protein 36, C3H type-like 1 (Zfp36l1), mRNA.	Zfp36l1	1.20625
ILMN_1376804	Rattus norvegicus glutaminyl-tRNA synthetase (Qars), mRNA.	Qars	1.20587
ILMN_1373348	Rattus norvegicus Fas (TNF receptor superfamily, member 6) (Fas), mRNA.	Fas	1.20533
ILMN_1362483	Rattus norvegicus Axl receptor tyrosine kinase (Axl), transcript variant 2, mRNA.	Axl	1.20523
ILMN_1375120	PREDICTED: Rattus norvegicus G protein-coupled receptor 126 (predicted) (Gpr126_predicted), mRNA.	Gpr126_predicted	1.20404
ILMN_1369927	PREDICTED: Rattus norvegicus transmembrane and coiled-coil domains 3 (predicted) (Tmco3_predicted), mRNA.	Tmco3_predicted	1.20403
ILMN_1352965	Rattus norvegicus ubiquitin-like domain containing CTD phosphatase 1 (Ublcp1), mRNA.	Ublcp1	1.2032
ILMN_1649715	PREDICTED: Rattus norvegicus similar to hypothetical protein PP1665 (predicted) (RGD1559673_predicted), mRNA.	RGD1559673_predicted	1.2026
ILMN_1353885	Rattus norvegicus zinc finger protein 219 (Zfp219), mRNA.	Zfp219	1.20205
ILMN_1360361	Rattus norvegicus scinderin (Scin), mRNA.	Scin	1.20154
ILMN_1358312	PREDICTED: Rattus norvegicus procollagen, type IX, alpha 3 (predicted) (Col9a3_predicted), mRNA.	Col9a3_predicted	1.20123
ILMN_1362575	PREDICTED: Rattus norvegicus similar to hypothetical protein MGC17337 (predicted) (RGD1308165_predicted), mRNA.	RGD1308165_predicted	1.2012
ILMN_1371904	PREDICTED: Rattus norvegicus pellino homolog 1 (Drosophila) (predicted) (Peli1_predicted), mRNA.	Peli1_predicted	1.20104
ILMN_1362595	Rattus norvegicus glutamate receptor interacting protein 1 (Grip1), mRNA.	Grip1	1.20095
ILMN_1358009	PREDICTED: Rattus norvegicus mannose receptor, C type 2 (predicted) (Mrc2_predicted), mRNA.	Mrc2_predicted	1.20056
ILMN_1367076	PREDICTED: Rattus norvegicus isoleucine-tRNA synthetase 2, mitochondrial (predicted) (Iars2_predicted), mRNA.	Iars2_predicted	1.20043
ILMN_1364180	PREDICTED: Rattus norvegicus similar to 60S ribosomal protein L12 (predicted) (RGD1564883_predicted), mRNA.	RGD1564883_predicted	1.20014
ILMN_1354658	Rattus norvegicus RIB43A domain with coiled-coils 1 (Ribc1), mRNA.	Ribc1	1.20007
ILMN_1376705	Rattus norvegicus NUF2, NDC80 kinetochore complex component, homolog (S. cerevisiae) (Nuf2), mRNA.	Nuf2	-1.20013
ILMN_1357504	Rattus norvegicus similar to PHD zinc finger containing protein JUNE1 (MGC94192), mRNA.	MGC94192	-1.20029
ILMN_1357060	PREDICTED: Rattus norvegicus mitochondrial ribosomal protein L3 (predicted) (Mrpl3_predicted), mRNA.	Mrpl3_predicted	-1.20061
ILMN_1361779	Rattus norvegicus transcription elongation factor A (SII), 3 (Tcea3), mRNA.	Tcea3	-1.20084
ILMN_1373251	PREDICTED: Rattus norvegicus similar to LRRGT00176 (LOC500285), mRNA.	LOC500285	-1.20106
ILMN_1371361	PREDICTED: Rattus norvegicus similar to helicase-like protein NHL isoform 2 (RGD1306721), mRNA.	RGD1306721	-1.20111
ILMN_1361919	Rattus norvegicus aminolevulinate, delta-, dehydratase (Alad), mRNA.	Alad	-1.20139
ILMN_1373746	Rattus norvegicus catenin, beta like 1 (Ctnnbl1), mRNA.	Ctnnbl1	-1.20167
ILMN_1372513	Rattus norvegicus transducer of ErbB-2.1 (Tob1), mRNA.	Tob1	-1.20172
ILMN_1355787	Rattus norvegicus eukaryotic translation initiation factor 2B, subunit 1 alpha (Eif2b1), mRNA.	Eif2b1	-1.20177
ILMN_1361885	PREDICTED: Rattus norvegicus pleckstrin homology-like domain, family A, member 2 (predicted) (Phlda2_predicted), mRNA.	Phlda2_predicted	-1.20182
ILMN_1356013	PREDICTED: Rattus norvegicus similar to MDM2 Binding protein (predicted), transcript variant 1 (RGD1565672_predicted), mRNA.	RGD1565672_predicted	-1.20199
ILMN_1366131	PREDICTED: Rattus norvegicus SMC2 structural maintenance of chromosomes 2-like 1 (yeast) (predicted) (Smc2l1_predicted), mRNA.	Smc2l1_predicted	-1.2021
ILMN_1369261	Rattus norvegicus similar to 2410004L22Rik protein (RGD1311565), mRNA.	RGD1311565	-1.20239
ILMN_1358384	PREDICTED: Rattus norvegicus NTF2-related export protein 1 (predicted) (Nxt1_predicted), mRNA.	Nxt1_predicted	-1.2029
ILMN_1375075	Rattus norvegicus ATPase family, AAA domain containing 3A (Atad3a), mRNA.	Atad3a	-1.20331
ILMN_1358804	PREDICTED: Rattus norvegicus exonuclease 1 (predicted) (Exo1_predicted), mRNA.	Exo1_predicted	-1.20406
ILMN_1353220	Rattus norvegicus stomatin (Epb7.2)-like 2 (Stoml2), mRNA.	Stoml2	-1.20493
ILMN_1349535	Rattus norvegicus RNA binding motif protein 10 (Rbm10), mRNA.	Rbm10	-1.20515
ILMN_1350438	Rattus norvegicus nuclear factor of kappa light chain gene enhancer in B-cells inhibitor, beta (Nfkbib), mRNA.	Nfkbib	-1.20527
ILMN_1367519	Rattus norvegicus isopentenyl-diphosphate delta isomerase (Idi1), mRNA.	Idi1	-1.20561
ILMN_1351640	Rattus norvegicus Hspb associated protein 1 (Hspbap1), mRNA.	Hspbap1	-1.20604
ILMN_1374114	Rattus norvegicus glutamate cysteine ligase, modifier subunit (Gclm), mRNA.	Gclm	-1.20622
ILMN_1376726	Rattus norvegicus diacylglycerol O-acyltransferase 2 (Dgat2), mRNA.	Dgat2	-1.20632
ILMN_1356628	PREDICTED: Rattus norvegicus nuclear factor of kappa light chain gene enhancer in B-cells inhibitor, alpha (Nfkbia), mRNA.	Nfkbia	-1.20639
ILMN_1360708	PREDICTED: Rattus norvegicus protein phosphatase methylesterase 1 (Ppme1), mRNA.	Ppme1	-1.20659
ILMN_1366394	Rattus norvegicus translocase of inner mitochondrial membrane 13 homolog (yeast) (Timm13), nuclear gene encoding mitochondrial protein, mRNA.	Timm13	-1.20661
ILMN_1351254	Rattus norvegicus T-cell, immune regulator 1, ATPase, H+ transporting, lysosomal V0 protein A3 (Tcirg1), mRNA.	Tcirg1	-1.20726
ILMN_1359089	Rattus norvegicus coenzyme Q3 homolog, methyltransferase (yeast) (Coq3), mRNA.	Coq3	-1.20748
ILMN_1359078	Rattus norvegicus solute carrier family 37 (glucose-6-phosphate transporter), member 4 (Slc37a4), mRNA.	Slc37a4	-1.2075
ILMN_1350421	PREDICTED: Rattus norvegicus similar to M2 ribonucleotide reductase (LOC304657), mRNA.	LOC304657	-1.20829
ILMN_1352417	Rattus norvegicus brain protein 16 (Brp16), mRNA.	Brp16	-1.20831
ILMN_1369074	Rattus norvegicus phosphoglycerate kinase 1 (Pgk1), mRNA.	Pgk1	-1.20892
ILMN_1350697	PREDICTED: Rattus norvegicus solute carrier family 25 (mitochondrial carrier; ornithine transporter) member 15, transcript variant 2 (Slc25a15), mRNA.	Slc25a15	-1.20932
ILMN_1367083	PREDICTED: Rattus norvegicus PAP associated domain containing 1 (predicted) (Papd1_predicted), mRNA.	Papd1_predicted	-1.20953
ILMN_1363792	Rattus norvegicus insulin degrading enzyme (Ide), mRNA.	Ide	-1.20963
ILMN_2039089	PREDICTED: Rattus norvegicus alcohol dehydrogenase 1 (class I) (Adh1), mRNA.	Adh1	-1.20981
ILMN_1362490	PREDICTED: Rattus norvegicus similar to RIKEN cDNA 2410004B18 (LOC499724), mRNA.	LOC499724	-1.21002
ILMN_1369326	PREDICTED: Rattus norvegicus asp (abnormal spindle)-like, microcephaly associated (Drosophila) (predicted) (Aspm_predicted), mRNA.	Aspm_predicted	-1.21011
ILMN_1357106	Rattus norvegicus caspase 6 (Casp6), mRNA.	Casp6	-1.2103
ILMN_1365068	Rattus norvegicus S100 calcium binding protein A3 (S100a3), mRNA.	S100a3	-1.21044
ILMN_1364154	PREDICTED: Rattus norvegicus similar to glyceraldehyde-3-phosphate dehydrogenase (LOC686275), mRNA.	LOC686275	-1.21057
ILMN_1374210	PREDICTED: Rattus norvegicus similar to hypothetical protein (RGD1311361), mRNA.	RGD1311361	-1.21071
ILMN_1359094	Rattus norvegicus glutathione S-transferase Yc2 subunit (Yc2), mRNA.	Yc2	-1.212
ILMN_1353855	Rattus norvegicus hydroxysteroid (17-beta) dehydrogenase 2 (Hsd17b2), mRNA.	Hsd17b2	-1.21239
ILMN_1370151	PREDICTED: Rattus norvegicus cyclin-dependent kinase 7 (homolog of Xenopus MO15 cdk-activating kinase) (Cdk7), mRNA.	Cdk7	-1.21252
ILMN_1364084	Rattus norvegicus lectin, galactose binding, soluble 4 (Lgals4), mRNA.	Lgals4	-1.21263
ILMN_1361132	Rattus norvegicus mitogen-activated protein kinase kinase 6 (Map2k6), mRNA.	Map2k6	-1.21303
ILMN_1360753	Rattus norvegicus uridine monophosphate synthetase (Umps), mRNA.	Umps	-1.21336
ILMN_1371398	Rattus norvegicus arginine/serine-rich coiled-coil 1 (Rsrc1), mRNA.	Rsrc1	-1.21369
ILMN_1351196	PREDICTED: Rattus norvegicus RAB, member of RAS oncogene family-like 4 (predicted) (Rabl4_predicted), mRNA.	Rabl4_predicted	-1.21396
ILMN_1365628	Rattus norvegicus sorting nexing 24 (Snx24), mRNA.	Snx24	-1.21466
ILMN_1368251	PREDICTED: Rattus norvegicus mitochondrial ribosomal protein S18C (predicted) (Mrps18c_predicted), mRNA.	Mrps18c_predicted	-1.21475
ILMN_1366081	PREDICTED: Rattus norvegicus similar to Glyceraldehyde-3-phosphate dehydrogenase (GAPDH) (LOC365321), mRNA.	LOC365321	-1.21484
ILMN_1353960	Rattus norvegicus isocitrate dehydrogenase 1 (NADP+), soluble (Idh1), mRNA.	Idh1	-1.21534
ILMN_1356224	Rattus norvegicus synaptogyrin 1 (Syngr1), mRNA.	Syngr1	-1.21547
ILMN_1349756	Rattus norvegicus similar to hypothetical protein (RGD1310571), mRNA.	RGD1310571	-1.2162
ILMN_1369803	PREDICTED: Rattus norvegicus FKBP-associated protein (Glmn), mRNA.	Glmn	-1.21712
ILMN_1366329	Rattus norvegicus torsin family 2, member A (Tor2a), mRNA.	Tor2a	-1.21793
ILMN_1368833	PREDICTED: Rattus norvegicus nucleolar protein 1 (predicted) (Nol1_predicted), mRNA.	Nol1_predicted	-1.21918
ILMN_1363823	PREDICTED: Rattus norvegicus coiled-coil domain containing 58 (predicted) (Ccdc58_predicted), mRNA.	Ccdc58_predicted	-1.22058
ILMN_1372846	Rattus norvegicus BCL2-antagonist/killer 1 (Bak1), mRNA.	Bak1	-1.22061
ILMN_1376891	Rattus norvegicus CNDP dipeptidase 2 (metallopeptidase M20 family) (Cndp2), mRNA.	Cndp2	-1.2218
ILMN_1368994	PREDICTED: Rattus norvegicus bobby sox homolog (Drosophila) (predicted) (Bbx_predicted), mRNA.	Bbx_predicted	-1.22181
ILMN_1376819	PREDICTED: Rattus norvegicus septin 4 (Sept4), mRNA.	2008-09-04	-1.2221
ILMN_1366813	Rattus norvegicus palmitoyl-protein thioesterase 2 (Ppt2), mRNA.	Ppt2	-1.22294
ILMN_1361983	PREDICTED: Rattus norvegicus sodium channel modifier 1 (predicted) (Scnm1_predicted), mRNA.	Scnm1_predicted	-1.2231
ILMN_1355760	PREDICTED: Rattus norvegicus phosphoglucomutase 1 (predicted) (Pgm1_predicted), mRNA.	Pgm1_predicted	-1.22317
ILMN_1353117	Rattus norvegicus peroxisomal trans-2-enoyl-CoA reductase (Pecr), mRNA.	Pecr	-1.22341
ILMN_1368342	PREDICTED: Rattus norvegicus similar to Putative protein 15E1.2 (predicted) (RGD1309698_predicted), mRNA.	RGD1309698_predicted	-1.22348
ILMN_1368461	PREDICTED: Rattus norvegicus similar to KIAA1126 protein (predicted) (RGD1309971_predicted), mRNA.	RGD1309971_predicted	-1.22357
ILMN_1373131	Rattus norvegicus nucleoporin 35 (Nup35), mRNA.	Nup35	-1.22419
ILMN_1370903	PREDICTED: Rattus norvegicus similar to glyoxylate reductase/hydroxypyruvate reductase (LOC683694), mRNA.	LOC683694	-1.22434
ILMN_1366253	PREDICTED: Rattus norvegicus hypothetical LOC287935 (predicted) (RGD1308065_predicted), mRNA.	RGD1308065_predicted	-1.22456
ILMN_1350418	PREDICTED: Rattus norvegicus similar to tubulin, beta 2 (LOC498736), mRNA.	LOC498736	-1.22507
ILMN_1374350	PREDICTED: Rattus norvegicus inositol polyphosphate-5-phosphatase A (predicted) (Inpp5a_predicted), mRNA.	Inpp5a_predicted	-1.22584
ILMN_1371867	PREDICTED: Rattus norvegicus similar to Putative ATP-dependent Clp protease proteolytic subunit, mitochondrial precursor (Endopeptidase Clp) (LOC301117), mRNA.	LOC301117	-1.22584
ILMN_1365924	PREDICTED: Rattus norvegicus similar to RIKEN cDNA 2610318K02 (predicted) (RGD1310905_predicted), mRNA.	RGD1310905_predicted	-1.22728
ILMN_1363228	PREDICTED: Rattus norvegicus elongation factor RNA polymerase II 2 (Ell2), mRNA.	Ell2	-1.22733
ILMN_1369875	PREDICTED: Rattus norvegicus similar to Phosphatidylserine receptor (predicted) (LOC498027), mRNA.	LOC498027	-1.22819
ILMN_1373210	Rattus norvegicus ectonucleoside triphosphate diphosphohydrolase 5 (Entpd5), mRNA.	Entpd5	-1.2283
ILMN_1351674	Rattus norvegicus growth differentiation factor 15 (Gdf15), mRNA.	Gdf15	-1.2284
ILMN_1358788	PREDICTED: Rattus norvegicus heat shock 70kDa protein 9A (predicted) (Hspa9a_predicted), mRNA.	Hspa9a_predicted	-1.22867
ILMN_1358078	PREDICTED: Rattus norvegicus hepatitis B virus x interacting protein (predicted) (Hbxip_predicted), mRNA.	Hbxip_predicted	-1.22873
ILMN_1371540	PREDICTED: Rattus norvegicus NADH dehydrogenase (ubiquinone) 1 alpha subcomplex, 8 (Ndufa8), mRNA.	Ndufa8	-1.22875
ILMN_1353818	Rattus norvegicus peroxisomal biogenesis factor 3 (Pex3), mRNA.	Pex3	-1.22898
ILMN_1372431	PREDICTED: Rattus norvegicus similar to G protein-coupled receptor 23 (LOC302378), mRNA.	LOC302378	-1.229
ILMN_1365251	PREDICTED: Rattus norvegicus hypothetical protein LOC311254 (LOC311254), mRNA.	LOC311254	-1.22902
ILMN_1349106	Rattus norvegicus WD repeat domain 23 (Wdr23), mRNA.	Wdr23	-1.22955
ILMN_1361156	Rattus norvegicus FXYD domain-containing ion transport regulator 3 (Fxyd3), mRNA.	Fxyd3	-1.22959
ILMN_1373399	Rattus norvegicus disabled homolog 2 (Drosophila) interacting protein (Dab2ip), mRNA.	Dab2ip	-1.22999
ILMN_1362859	PREDICTED: Rattus norvegicus mitochondrial ribosomal protein L22 (predicted) (Mrpl22_predicted), mRNA.	Mrpl22_predicted	-1.23003
ILMN_1373829	Rattus norvegicus endoplasmic reticulum metallopeptidase 1 (Ermp1), mRNA.	Ermp1	-1.2301
ILMN_2040226	Rattus norvegicus acidic (leucine-rich) nuclear phosphoprotein 32 family, member E (Anp32e), mRNA.	Anp32e	-1.23082
ILMN_1372842	PREDICTED: Rattus norvegicus cysteinyl-tRNA synthetase (predicted) (Cars_predicted), mRNA.	Cars_predicted	-1.23109
ILMN_1650112	PREDICTED: Rattus norvegicus similar to CGI-96 protein; gastric cancer antigen Zg14 (RGD1311547), mRNA.	RGD1311547	-1.23141
ILMN_1354271	PREDICTED: Rattus norvegicus polymerase (DNA directed), epsilon 2 (p59 subunit) (predicted) (Pole2_predicted), mRNA.	Pole2_predicted	-1.23146
ILMN_1368907	Rattus norvegicus MMR_HSR1 domain containing protein RGD1359460 (RGD1359460), mRNA.	RGD1359460	-1.23168
ILMN_1355763	Rattus norvegicus eukaryotic translation initiation factor 2B, subunit 4 delta (Eif2b4), mRNA.	Eif2b4	-1.23254
ILMN_1373264	PREDICTED: Rattus norvegicus poly (ADP-ribose) polymerase family, member 2 (predicted) (Parp2_predicted), mRNA.	Parp2_predicted	-1.2328
ILMN_1360658	PREDICTED: Rattus norvegicus similar to hypothetical protein LOC168850 (predicted) (RGD1560157_predicted), mRNA.	RGD1560157_predicted	-1.23288
ILMN_1349112	Rattus norvegicus exocyst complex component 6 (Exoc6), mRNA.	Exoc6	-1.23294
ILMN_1366773	Rattus norvegicus sorbitol dehydrogenase (Sord), mRNA.	Sord	-1.233
ILMN_1371925	Rattus norvegicus iron-sulfur cluster assembly 1 homolog (S. cerevisiae) (Isca1), mRNA.	Isca1	-1.23313
ILMN_1364926	PREDICTED: Rattus norvegicus similar to Myosin VI (predicted) (RGD1560646_predicted), mRNA.	RGD1560646_predicted	-1.23335
ILMN_1650818	Rattus norvegicus triosephosphate isomerase 1 (Tpi1), mRNA.	Tpi1	-1.23369
ILMN_1354619	PREDICTED: Rattus norvegicus similar to RNA (guanine-9-) methyltransferase domain containing 2 (LOC295496), mRNA.	LOC295496	-1.23408
ILMN_1358183	Rattus norvegicus kinesin family member 22 (Kif22), mRNA.	Kif22	-1.23418
ILMN_1372262	Rattus norvegicus small G protein signaling modulator 3 (Sgsm3), mRNA.	Sgsm3	-1.23432
ILMN_1352220	PREDICTED: Rattus norvegicus cofilin 2, muscle (predicted) (Cfl2_predicted), mRNA.	Cfl2_predicted	-1.23445
ILMN_1374297	PREDICTED: Rattus norvegicus similar to Glyceraldehyde-3-phosphate dehydrogenase (GAPDH) (LOC502077), mRNA.	LOC502077	-1.23462
ILMN_1359532	PREDICTED: Rattus norvegicus solute carrier family 4 (anion exchanger), member 1, adaptor protein (predicted) (Slc4a1ap_predicted), mRNA.	Slc4a1ap_predicted	-1.23548
ILMN_1359126	PREDICTED: Rattus norvegicus protein regulator of cytokinesis 1 (predicted) (Prc1_predicted), mRNA.	Prc1_predicted	-1.23575
ILMN_1364536	Rattus norvegicus dihydrolipoamide S-acetyltransferase (E2 component of pyruvate dehydrogenase complex) (Dlat), mRNA.	Dlat	-1.23674
ILMN_2040300	Rattus norvegicus branched chain aminotransferase 1, cytosolic (Bcat1), mRNA.	Bcat1	-1.2368
ILMN_1376696	Rattus norvegicus polymerase (RNA) III (DNA directed) polypeptide C (Polr3c), mRNA.	Polr3c	-1.23841
ILMN_1359322	Rattus norvegicus nuclear distribution gene C homolog (Aspergillus) (Nudc), mRNA.	Nudc	-1.23939
ILMN_1364997	Rattus norvegicus nucleoporin 85 (Nup85), mRNA.	Nup85	-1.24001
ILMN_1372596	Rattus norvegicus peroxiredoxin 1 (Prdx1), mRNA.	Prdx1	-1.24035
ILMN_1355507	Rattus norvegicus bromodomain containing 2 (Brd2), mRNA.	Brd2	-1.24125
ILMN_1351732	PREDICTED: Rattus norvegicus similar to Glyceraldehyde-3-phosphate dehydrogenase (GAPDH) (LOC688528), mRNA.	LOC688528	-1.24134
ILMN_1354116	PREDICTED: Rattus norvegicus pseudogene for diazepam binding inhibitor 1 (LOC301444), mRNA.	LOC301444	-1.2415
ILMN_1350318	Rattus norvegicus phosphofructokinase, platelet (Pfkp), mRNA.	Pfkp	-1.24183
ILMN_1358541	Rattus norvegicus insulin-like growth factor binding protein 6 (Igfbp6), mRNA.	Igfbp6	-1.24249
ILMN_1364990	PREDICTED: Rattus norvegicus similar to NF-kappa-B-repressing factor (Transcription factor NRF) (predicted) (RGD1563950_predicted), mRNA.	RGD1563950_predicted	-1.24346
ILMN_1356563	PREDICTED: Rattus norvegicus prostaglandin E synthase 2 (predicted) (Ptges2_predicted), mRNA.	Ptges2_predicted	-1.24363
ILMN_1370063	Rattus norvegicus malate dehydrogenase 1, NAD (soluble) (Mdh1), mRNA.	Mdh1	-1.2437
ILMN_1353748	PREDICTED: Rattus norvegicus similar to Hypothetical UPF0049 protein ZK1128.2 in chromosome III (LOC360568), mRNA.	LOC360568	-1.24445
ILMN_1370511	Rattus norvegicus ATP synthase, H+ transporting, mitochondrial F0 complex, subunit c (subunit 9), isoform 1 (Atp5g1), nuclear gene encoding mitochondrial protein, mRNA.	Atp5g1	-1.24515
ILMN_1369643	Rattus norvegicus mitochondrial ribosomal protein L37 (Mrpl37), nuclear gene encoding mitochondrial protein, mRNA.	Mrpl37	-1.24532
ILMN_1351935	Rattus norvegicus muskelin 1, intracellular mediator containing kelch motifs (Mkln1), mRNA.	Mkln1	-1.24562
ILMN_1367920	Rattus norvegicus enolase 2, gamma (Eno2), mRNA.	Eno2	-1.2459
ILMN_1363587	Rattus norvegicus solute carrier family 25 (mitochondrial thiamine pyrophosphate carrier), member 19 (Slc25a19), nuclear gene encoding mitochondrial protein, mRNA.	Slc25a19	-1.24696
ILMN_1358763	Rattus norvegicus similar to DNA segment, Chr 14, ERATO Doi 449, expressed (RGD1305689), mRNA.	RGD1305689	-1.24894
ILMN_1370863	PREDICTED: Rattus norvegicus similar to 39S ribosomal protein L28, mitochondrial precursor (L28mt) (MRP-L28) (LOC497876), mRNA.	LOC497876	-1.24983
ILMN_1365523	Rattus norvegicus methylenetetrahydrofolate dehydrogenase (NADP+ dependent), methenyltetrahydrofolate cyclohydrolase, formyltetrahydrofolate synthase (Mthfd1), mRNA.	Mthfd1	-1.25003
ILMN_1351035	Rattus norvegicus H2A histone family, member Z (H2afz), mRNA.	H2afz	-1.25017
ILMN_1360881	Rattus norvegicus similar to RIKEN cDNA 1110001J03 (MGC112899), mRNA.	MGC112899	-1.25027
ILMN_1372814	PREDICTED: Rattus norvegicus immediate early response 5-like (Ier5l), mRNA.	Ier5l	-1.25186
ILMN_1371849	PREDICTED: Rattus norvegicus coiled-coil domain containing 59 (predicted) (Ccdc59_predicted), mRNA.	Ccdc59_predicted	-1.25187
ILMN_1369433	Rattus norvegicus aminoadipate aminotransferase (Aadat), mRNA.	Aadat	-1.25214
ILMN_1349218	Rattus norvegicus caspase 3, apoptosis related cysteine protease (Casp3), mRNA.	Casp3	-1.25237
ILMN_1364310	PREDICTED: Rattus norvegicus similar to RIKEN cDNA 2410004C24 (predicted) (RGD1308049_predicted), mRNA.	RGD1308049_predicted	-1.25252
ILMN_1376712	Rattus norvegicus COX4 neighbor (Cox4nb), mRNA.	Cox4nb	-1.25337
ILMN_1353040	PREDICTED: Rattus norvegicus SLIT and NTRK-like family, member 5 (predicted) (Slitrk5_predicted), mRNA.	Slitrk5_predicted	-1.25371
ILMN_1369426	Rattus norvegicus carbonic anhydrase 8 (Car8), mRNA.	Car8	-1.25534
ILMN_1354821	PREDICTED: Rattus norvegicus similar to chromosome 13 open reading frame 3 (predicted) (RGD1307201_predicted), mRNA.	RGD1307201_predicted	-1.25596
ILMN_1367571	PREDICTED: Rattus norvegicus similar to glyceraldehyde-3-phosphate dehydrogenase (predicted) (RGD1564688_predicted), mRNA.	RGD1564688_predicted	-1.25645
ILMN_1365610	PREDICTED: Rattus norvegicus similar to Delta-interacting protein A (Hepatitis delta antigen interacting protein A) (predicted) (RGD1565319_predicted), mRNA.	RGD1565319_predicted	-1.25789
ILMN_1372195	PREDICTED: Rattus norvegicus RAB, member of RAS oncogene family-like 3 (predicted) (Rabl3_predicted), mRNA.	Rabl3_predicted	-1.25844
ILMN_1350035	Rattus norvegicus glutathione S-transferase theta 1 (Gstt1), mRNA.	Gstt1	-1.2587
ILMN_1355184	PREDICTED: Rattus norvegicus N-acetylneuraminic acid synthase (sialic acid synthase) (predicted) (Nans_predicted), mRNA.	Nans_predicted	-1.25953
ILMN_1376480	Rattus norvegicus 3-hydroxy-3-methylglutaryl-Coenzyme A synthase 1 (Hmgcs1), mRNA.	Hmgcs1	-1.26022
ILMN_1356747	PREDICTED: Rattus norvegicus similar to RIKEN cDNA 2410116I05 (LOC363377), mRNA.	LOC363377	-1.26072
ILMN_1376244	Rattus norvegicus UPF3 regulator of nonsense transcripts homolog A (yeast) (Upf3a), mRNA.	Upf3a	-1.26191
ILMN_1376694	Rattus norvegicus cAMP responsive element modulator (Crem), transcript variant 2, mRNA.	Crem	-1.26203
ILMN_1359063	PREDICTED: Rattus norvegicus TAF6-like RNA polymerase II, p300/CBP-associated factor (PCAF)-associated factor (predicted) (Taf6l_predicted), mRNA.	Taf6l_predicted	-1.26361
ILMN_1362980	PREDICTED: Rattus norvegicus BMS1-like, ribosome assembly protein (yeast) (Bms1l), mRNA.	Bms1l	-1.26374
ILMN_1349648	Rattus norvegicus glycogen synthase kinase 3 beta (Gsk3b), mRNA.	Gsk3b	-1.26414
ILMN_1363374	PREDICTED: Rattus norvegicus similar to ferritin light chain (predicted) (RGD1566189_predicted), mRNA.	RGD1566189_predicted	-1.26561
ILMN_1366344	Rattus norvegicus DEAH (Asp-Glu-Ala-His) box polypeptide 16 (Dhx16), mRNA.	Dhx16	-1.26588
ILMN_1363543	Rattus norvegicus serine/threonine kinase 6 (Stk6), mRNA.	Stk6	-1.26686
ILMN_1376840	Rattus norvegicus SH2 domain containing 4A (Sh2d4a), mRNA.	Sh2d4a	-1.26703
ILMN_1365083	PREDICTED: Rattus norvegicus H2.0-like homeo box 1 (Drosophila) (predicted) (Hlx1_predicted), mRNA.	Hlx1_predicted	-1.26721
ILMN_1367834	PREDICTED: Rattus norvegicus cellular retinoic acid binding protein 2 (Crabp2), mRNA.	Crabp2	-1.26739
ILMN_1361657	Rattus norvegicus elaC homolog 2 (E. coli) (Elac2), mRNA.	Elac2	-1.2678
ILMN_1365578	PREDICTED: Rattus norvegicus similar to Ferritin light chain 2 (Ferritin L subunit 2) (Ferritin subunit LG) (predicted) (RGD1561055_predicted), mRNA.	RGD1561055_predicted	-1.26802
ILMN_1376738	Rattus norvegicus tryptophanyl-tRNA synthetase (Wars), mRNA.	Wars	-1.26807
ILMN_1372022	Rattus norvegicus GTP cyclohydrolase 1 (Gch1), mRNA.	Gch1	-1.26844
ILMN_1350091	Rattus norvegicus G0/G1 switch gene 2 (G0s2), mRNA.	G0s2	-1.26906
ILMN_1352534	PREDICTED: Rattus norvegicus metastasis associated 3 (predicted) (Mta3_predicted), mRNA.	Mta3_predicted	-1.26944
ILMN_1359219	Rattus norvegicus allograft inflammatory factor 1 (Aif1), mRNA.	Aif1	-1.27189
ILMN_1651054	PREDICTED: Rattus norvegicus similar to Bifunctional methylenetetrahydrofolate dehydrogenase/cyclohydrolase, mitochondrial precursor, transcript variant 2 (LOC684490), mRNA.	LOC684490	-1.27276
ILMN_1361287	PREDICTED: Rattus norvegicus SRB7 (suppressor of RNA polymerase B) homolog (S. cerevisiae) (predicted) (Surb7_predicted), mRNA.	Surb7_predicted	-1.27292
ILMN_1353223	Rattus norvegicus nudix (nucleoside diphosphate linked moiety X)-type motif 19 (Nudt19), mRNA.	Nudt19	-1.27477
ILMN_1353786	PREDICTED: Rattus norvegicus similar to Dual specificity protein phosphatase 3 (T-DSP11) (predicted) (RGD1560049_predicted), mRNA.	RGD1560049_predicted	-1.27537
ILMN_1348958	Rattus norvegicus RAB14, member RAS oncogene family (Rab14), mRNA.	Rab14	-1.27554
ILMN_1357206	PREDICTED: Rattus norvegicus cytochrome c-1 (predicted) (Cyc1_predicted), mRNA.	Cyc1_predicted	-1.27683
ILMN_1367396	Rattus norvegicus F-box protein 2 (Fbxo2), mRNA.	Fbxo2	-1.27708
ILMN_1354185	Rattus norvegicus nucleolar and coiled-body phosphoprotein 1 (Nolc1), mRNA.	Nolc1	-1.27848
ILMN_1650700	PREDICTED: Rattus norvegicus similar to ORF7 (LOC360941), mRNA.	LOC360941	-1.27892
ILMN_1358232	Rattus norvegicus transmembrane 7 superfamily member 2 (Tm7sf2), mRNA.	Tm7sf2	-1.27973
ILMN_1366911	Rattus norvegicus asparaginase like 1 (Asrgl1), mRNA.	Asrgl1	-1.28335
ILMN_1373380	Rattus norvegicus mitochondrial ribosomal protein L19 (Mrpl19), nuclear gene encoding mitochondrial protein, mRNA.	Mrpl19	-1.2834
ILMN_1356965	PREDICTED: Rattus norvegicus GTP binding protein 6 (putative) (predicted) (Gtpbp6_predicted), mRNA.	Gtpbp6_predicted	-1.28374
ILMN_1363216	Rattus norvegicus lon peptidase 1, mitochondrial (Lonp1), nuclear gene encoding mitochondrial protein, mRNA.	Lonp1	-1.2839
ILMN_1364409	PREDICTED: Rattus norvegicus NADH dehydrogenase (ubiquinone) 1 beta subcomplex, 9 (predicted) (Ndufb9_predicted), mRNA.	Ndufb9_predicted	-1.28603
ILMN_1358144	Rattus norvegicus heat shock protein 90, alpha (cytosolic), class A member 1 (Hsp90aa1), mRNA.	Hsp90aa1	-1.28793
ILMN_1355922	Rattus norvegicus deoxyhypusine synthase (Dhps), mRNA.	Dhps	-1.2888
ILMN_1373755	Rattus norvegicus armadillo repeat containing, X-linked 3 (Armcx3), mRNA.	Armcx3	-1.28935
ILMN_1373862	PREDICTED: Rattus norvegicus selenophosphate synthetase 2 (Sephs2), mRNA.	Sephs2	-1.29015
ILMN_1357053	Rattus norvegicus lipoprotein lipase (Lpl), mRNA.	Lpl	-1.29126
ILMN_1364500	PREDICTED: Rattus norvegicus heat shock 90kDa protein 1, alpha-like 3 (predicted) (Hspcal3_predicted), mRNA.	Hspcal3_predicted	-1.29504
ILMN_1360587	Rattus norvegicus cyclin B2 (Ccnb2), mRNA.	Ccnb2	-1.29508
ILMN_1370603	Rattus norvegicus UFM1-specific peptidase 2 (Ufsp2), mRNA.	Ufsp2	-1.29571
ILMN_1360052	PREDICTED: Rattus norvegicus similar to adaptor molecule SRCASM (LOC287622), mRNA.	LOC287622	-1.29582
ILMN_1363670	Rattus norvegicus cyclin G1 (Ccng1), mRNA.	Ccng1	-1.29618
ILMN_2039222	PREDICTED: Rattus norvegicus glyceraldehyde 3-phosphate dehydrogenase (Gapdh), mRNA.	Gapdh	-1.29671
ILMN_1376866	Rattus norvegicus zinc finger with KRAB and SCAN domains 6 (Zkscan6), mRNA.	Zkscan6	-1.29793
ILMN_1530495	Rattus norvegicus hypothetical protein LOC303332 (LOC303332), mRNA.	LOC303332	-1.29826
ILMN_1358103	Rattus norvegicus threonyl-tRNA synthetase (Tars), mRNA.	Tars	-1.29897
ILMN_1370269	PREDICTED: Rattus norvegicus kinesin family member 20A (predicted) (Kif20a_predicted), mRNA.	Kif20a_predicted	-1.3
ILMN_1349445	PREDICTED: Rattus norvegicus exosome component 2 (predicted) (Exosc2_predicted), mRNA.	Exosc2_predicted	-1.30298
ILMN_1368601	Rattus norvegicus mammary tumor virus receptor 2 (Mtvr2), mRNA.	Mtvr2	-1.30318
ILMN_1366923	Rattus norvegicus acyl-CoA thioesterase 7 (Acot7), mRNA.	Acot7	-1.30372
ILMN_1373523	Rattus norvegicus insulin-like growth factor binding protein 3 (Igfbp3), mRNA.	Igfbp3	-1.30455
ILMN_1369432	Rattus norvegicus polo-like kinase 1 (Drosophila) (Plk1), mRNA.	Plk1	-1.30494
ILMN_1368841	Rattus norvegicus leucine rich repeat containing 59 (Lrrc59), mRNA.	Lrrc59	-1.30539
ILMN_1359632	PREDICTED: Rattus norvegicus similar to Glyceraldehyde-3-phosphate dehydrogenase (GAPDH) (LOC295452), mRNA.	LOC295452	-1.30584
ILMN_1361128	Rattus norvegicus acetyl-Coenzyme A acetyltransferase 2 (Acat2), mRNA.	Acat2	-1.30637
ILMN_1354236	Rattus norvegicus Fas-associated factor 1 (Faf1), mRNA.	Faf1	-1.30756
ILMN_1374332	Rattus norvegicus heat shock 27kDa protein 1 (Hspb1), mRNA.	Hspb1	-1.30794
ILMN_1364814	PREDICTED: Rattus norvegicus similar to glyceraldehyde-3-phosphate dehydrogenase (LOC361841), mRNA.	LOC361841	-1.30835
ILMN_1366334	PREDICTED: Rattus norvegicus isoleucine-tRNA synthetase (predicted) (Iars_predicted), mRNA.	Iars_predicted	-1.30889
ILMN_1369504	Rattus norvegicus PIH1 domain containing 1 (Pih1d1), mRNA.	Pih1d1	-1.31537
ILMN_1361035	Rattus norvegicus pyridoxal (pyridoxine, vitamin B6) kinase (Pdxk), mRNA.	Pdxk	-1.31595
ILMN_1371379	PREDICTED: Rattus norvegicus proteasome (prosome, macropain) 26S subunit, non-ATPase, 5 (predicted) (Psmd5_predicted), mRNA.	Psmd5_predicted	-1.31722
ILMN_1368121	Rattus norvegicus opioid growth factor receptor-like 1 (Ogfrl1), mRNA.	Ogfrl1	-1.3174
ILMN_1376894	Rattus norvegicus sequestosome 1 (Sqstm1), transcript variant 1, mRNA.	Sqstm1	-1.32232
ILMN_1356169	Rattus norvegicus 5'-nucleotidase domain containing 2 (Nt5dc2), mRNA.	Nt5dc2	-1.32809
ILMN_1650288	PREDICTED: Rattus norvegicus hypothetical protein LOC682248 (LOC682248), mRNA.	LOC682248	-1.32966
ILMN_1368982	PREDICTED: Rattus norvegicus similar to ribosomal protein P0-like protein; 60S acidic ribosomal protein PO; ribosomal protein, large, P0-like (predicted) (RGD1311709_predicted), mRNA.	RGD1311709_predicted	-1.32982
ILMN_1362278	Rattus norvegicus solute carrier family 5 (inositol transporters), member 3 (Slc5a3), mRNA.	Slc5a3	-1.33105
ILMN_1367954	Rattus norvegicus DEAD (Asp-Glu-Ala-Asp) box polypeptide 39 (Ddx39), mRNA.	Ddx39	-1.33114
ILMN_1369615	Rattus norvegicus Interleukin 23, alpha subunit p19 (Il23a), mRNA.	Il23a	-1.33624
ILMN_1359516	Rattus norvegicus glutamate-cysteine ligase, catalytic subunit (Gclc), mRNA.	Gclc	-1.33646
ILMN_1355484	Rattus norvegicus rod outer segment membrane protein 1 (Rom1), mRNA.	Rom1	-1.33678
ILMN_1360989	PREDICTED: Rattus norvegicus HIG1 domain family, member 2A (predicted) (Higd2a_predicted), mRNA.	Higd2a_predicted	-1.3476
ILMN_1363365	PREDICTED: Rattus norvegicus MAD2 (mitotic arrest deficient, homolog)-like 1 (yeast) (predicted) (Mad2l1_predicted), mRNA.	Mad2l1_predicted	-1.34836
ILMN_1371795	Rattus norvegicus phenazine biosynthesis-like protein domain containing (Pbld), mRNA.	Pbld	-1.34877
ILMN_1371376	PREDICTED: Rattus norvegicus stromal interaction molecule 1 (predicted) (Stim1_predicted), mRNA.	Stim1_predicted	-1.35418
ILMN_1358746	PREDICTED: Rattus norvegicus similar to ATP synthase lipid-binding protein, mitochondrial precursor (ATP synthase proteolipid P1) (predicted) (RGD1563463_predicted), mRNA.	RGD1563463_predicted	-1.35483
ILMN_1376588	Rattus norvegicus glucose-6-phosphate dehydrogenase X-linked (G6pdx), mRNA.	G6pdx	-1.35673
ILMN_1374125	PREDICTED: Rattus norvegicus hypothetical protein LOC686771 (LOC686771), mRNA.	LOC686771	-1.35831
ILMN_1366126	PREDICTED: Rattus norvegicus similar to methylenetetrahydrofolate dehydrogenase (NAD) (EC 1.5.1.15)/methenyltetrahydrofolate cyclohydrolase (EC 3.5.4.9) precursor (predicted) (RGD1564040_predicted), mRNA.	RGD1564040_predicted	-1.36084
ILMN_1360629	PREDICTED: Rattus norvegicus small nuclear ribonucleoprotein polypeptide A' (predicted) (Snrpa1_predicted), mRNA.	Snrpa1_predicted	-1.3611
ILMN_1370665	Rattus norvegicus zinc finger, AN1-type domain 2A (Zfand2a), mRNA.	Zfand2a	-1.36149
ILMN_1369002	PREDICTED: Rattus norvegicus similar to glyceraldehyde-3-phosphate dehydrogenase (predicted) (RGD1565238_predicted), mRNA.	RGD1565238_predicted	-1.36728
ILMN_1360491	PREDICTED: Rattus norvegicus similar to RIKEN cDNA 1500031M22 (predicted) (RGD1311752_predicted), mRNA.	RGD1311752_predicted	-1.3709
ILMN_1352626	PREDICTED: Rattus norvegicus similar to H2A histone family, member Z (LOC499180), mRNA.	LOC499180	-1.37153
ILMN_1357590	Rattus norvegicus achaete-scute complex homolog 2 (Drosophila) (Ascl2), mRNA.	Ascl2	-1.37366
ILMN_1354070	PREDICTED: Rattus norvegicus putative ISG12(b) protein (isg12(b)), mRNA.	isg12(b)	-1.37514
ILMN_1353258	PREDICTED: Rattus norvegicus discs, large homolog 7 (Drosophila) (predicted) (Dlg7_predicted), mRNA.	Dlg7_predicted	-1.37873
ILMN_1362585	Rattus norvegicus acylpeptide hydrolase (Apeh), mRNA.	Apeh	-1.38005
ILMN_1354571	Rattus norvegicus proteasome (prosome, macropain) 26S subunit, non-ATPase, 9 (Psmd9), mRNA.	Psmd9	-1.38361
ILMN_1363059	PREDICTED: Rattus norvegicus similar to glyceraldehyde-3-phosphate dehydrogenase (predicted) (RGD1560797_predicted), mRNA.	RGD1560797_predicted	-1.38397
ILMN_1374825	PREDICTED: Rattus norvegicus similar to Hypothetical protein FLJ25422 (predicted) (LOC294789), mRNA.	LOC294789	-1.38501
ILMN_1376870	Rattus norvegicus huntingtin-associated protein 1 (Hap1), transcript variant 2, mRNA.	Hap1	-1.40117
ILMN_1364259	PREDICTED: Rattus norvegicus annexin A13 (predicted) (Anxa13_predicted), mRNA.	Anxa13_predicted	-1.40259
ILMN_1369934	Rattus norvegicus adenosine monophosphate deaminase 3 (Ampd3), mRNA.	Ampd3	-1.40397
ILMN_1368144	Rattus norvegicus caspase 11 (Casp11), mRNA.	Casp11	-1.40984
ILMN_1366203	Rattus norvegicus selenium binding protein 1 (Selenbp1), mRNA.	Selenbp1	-1.41165
ILMN_1361302	Rattus norvegicus Kruppel-like factor 5 (Klf5), mRNA.	Klf5	-1.41321
ILMN_1349207	Rattus norvegicus inhibitor of DNA binding 2 (Id2), mRNA.	Id2	-1.41905
ILMN_1374544	Rattus norvegicus asparaginyl-tRNA synthetase (Nars), mRNA.	Nars	-1.4225
ILMN_1367107	Rattus norvegicus aquaporin 8 (Aqp8), mRNA.	Aqp8	-1.42383
ILMN_1360706	Rattus norvegicus solute carrier family 7 (cationic amino acid transporter, y+ system), member 3 (Slc7a3), mRNA.	Slc7a3	-1.44245
ILMN_1376479	Rattus norvegicus glutathione-S-transferase, pi 1 (Gstp1), mRNA.	Gstp1	-1.44325
ILMN_1354910	Rattus norvegicus aldo-keto reductase family 1, member B8 (Akr1b8), mRNA.	Akr1b8	-1.44427
[truncated: 22 more rows]
